1  
2  
3  
4  
5  
6  
7  
8  
9  
10  
11  
12  
13  
14  
15  
16  
17  
18  
19  
20  
21  
22  
23  
24  
25  
26  
27  
28

**The hexosamine biosynthesis pathway is a targetable liability in lung cancers with concurrent KRAS and LKB1 mutations.**

Jiyeon Kim<sup>1\*</sup>, Feng Cai<sup>2</sup>, Bookyung Ko<sup>2</sup>, Chendong Yang<sup>2</sup>, Hyun Min Lee<sup>1</sup>, Nefertiti Muhammad<sup>1</sup>, Kailong Li<sup>2</sup>, Mohamed Haloul<sup>1</sup>, Wen Gu<sup>2</sup>, Brandon Faubert<sup>2</sup>, Akash K. Kaushik<sup>2</sup>, Ling Cai<sup>3</sup>, Sahba Kasiri<sup>4</sup>, Ummay Marriam<sup>4</sup>, Kien Nham<sup>5</sup>, Luc Girard<sup>4</sup>, Hui Wang<sup>6,14</sup>, Xiankai Sun<sup>5,7</sup>, James Kim<sup>4,8</sup>, John D. Minna<sup>4,12</sup>, Keziban Unsal-Kacmaz<sup>9,15</sup> and Ralph J. DeBerardinis<sup>2,10,11,13\*</sup>

<sup>1</sup>Department of Biochemistry and Molecular Genetics, University of Illinois at Chicago, Chicago IL USA 60607

<sup>2</sup>Children’s Medical Center Research Institute, <sup>3</sup>Department of Population and Data Sciences, <sup>4</sup>Hamon Center for Therapeutic Oncology Research, <sup>5</sup>Department of Radiology, <sup>7</sup>Advanced Imaging Research Center, <sup>8</sup>Department of Internal Medicine, <sup>10</sup>Department of Pediatrics, <sup>11</sup>McDermott Center for Human Growth and Development, <sup>12</sup>Simmons Comprehensive Cancer Center, UT Southwestern Medical Center, Dallas, TX USA 75390-8502.

<sup>6</sup>Oncology Research & Development, Pfizer Inc., 10674 Science Center Drive, San Diego, CA 92121, USA

<sup>9</sup>Oncology Research Unit, Pfizer Inc., 401 North Middletown Road, Pearl River, NY 10965

<sup>13</sup>Howard Hughes Medical Institute, UT Southwestern Medical Center, Dallas, TX USA 75390-8502.

<sup>14</sup>Current address: Cancer Therapeutics Department, Genomics Institute of the Novartis Research Foundation, San Diego, CA 92121, USA

<sup>15</sup>Current address: Oncology Translational Development, Bristol Myers Squibb, Lawrenceville, NJ 08543

\*Co-corresponding authors

Email address:

[jiyeonk@uic.edu](mailto:jiyeonk@uic.edu), [Ralph.Deberardinis@UTSouthwestern.edu](mailto:Ralph.Deberardinis@UTSouthwestern.edu)

## 29 **Abstract**

30 In non–small cell lung cancer (NSCLC), concurrent mutations in the oncogene *KRAS* and the tumor  
31 suppressor *STK11* encoding the kinase LKB1 result in aggressive tumors prone to metastasis but with  
32 liabilities arising from reprogrammed metabolism. We previously demonstrated perturbed nitrogen  
33 metabolism and addiction to an unconventional pathway of pyrimidine synthesis in *KRAS*/LKB1 co-mutant  
34 (KL) cancer cells. To gain broader insight into metabolic reprogramming in NSCLC, we analyzed tumor  
35 metabolomes in a series of genetically engineered mouse models with oncogenic *KRAS* combined with  
36 mutations in LKB1 or p53. Metabolomics and gene expression profiling pointed towards an activation of  
37 the hexosamine biosynthesis pathway (HBP), another nitrogen-related metabolic pathway, in both mouse  
38 and human KL mutant tumors. KL cells contain high levels of HBP metabolites, higher flux through the HBP  
39 pathway and elevated dependence on the HBP enzyme Glutamine-Fructose-6-Phosphate Transaminase 2  
40 (GFPT2). GFPT2 inhibition selectively reduced KL cell growth in culture and xenografts. Our results define  
41 a new metabolic vulnerability in KL tumors and provide a rationale for targeting GFPT2 in this aggressive  
42 NSCLC subtype.

## 43 **Introduction**

44 Despite recent advances in treatment of non-small cell lung cancers (NSCLCs), they continue to be the  
45 leading cause of cancer-related deaths worldwide. Large-scale sequencing efforts have defined the tumor  
46 suppressors and oncogenes mutated in NSCLC, but most of these mutations are not yet subject to targeted  
47 therapy. Of these mutations, *STK11*, which encodes the tumor suppressor LKB1, is mutated in ~20% of  
48 NSCLCs. *KRAS* is the most frequently mutated oncogene in lung adenocarcinoma (LUAD, ~30%), the most  
49 common histological subtype of NSCLC. Some 6-12% of LUAD contain concurrent mutations in *KRAS* and  
50 LKB1, and these co-mutant tumors display a highly metastatic phenotype not observed with other  
51 combinations of mutations<sup>1-3</sup>. LKB1 alterations in the context of *KRAS* mutation drive primary resistance  
52 to PD-1 blockade, rendering these tumors unfavorable for immunotherapy<sup>4</sup>. Thus, further insight into the  
53 biology and vulnerabilities of these tumors could yield substantial therapeutic impact.

54

55

56 Metabolic reprogramming is a hallmark of cancer, as tumors alter metabolic pathways to meet the  
57 bioenergetic, biosynthetic, and redox requirements of malignancy. Mutation of oncogenes and/or tumor  
58 suppressors are a major factor in cell-autonomous metabolic reprogramming. Interestingly, oncogenic

59 KRAS and LKB1 loss independently alter metabolism in cancer cells. Oncogenic KRAS enhances glucose  
60 uptake and glycolysis<sup>5,6</sup>, stimulates glutamine catabolism<sup>7</sup>, increases fatty acid uptake for macromolecular  
61 synthesis and modulates redox balance<sup>8</sup>. LKB1 participates in fuel sensing by regulating AMP-activated  
62 protein kinase (AMPK) and other kinases during energetic stress<sup>9</sup>. The LKB1-AMPK pathway suppresses  
63 mTOR complex 1 signaling, re-setting the balance between energy production and utilization<sup>10</sup>. Liabilities  
64 in the KRAS/LKB1 co-mutant state include enhanced dependence on the electron transport chain<sup>11</sup>, the  
65 pyrimidine synthesis enzyme deoxythymidylate kinase<sup>12</sup>, lysosomal acidification<sup>13</sup> and the urea cycle  
66 enzyme carbamoyl phosphate synthetase 1 (CPS1)<sup>14</sup>.

67 In order to identify additional metabolic vulnerabilities in KRAS/LKB1 co-mutants, we integrated metabolic  
68 and gene expression profiles of lung tumors from a series of genetically-modified mice. This analysis  
69 pointed to induction of the hexosamine biosynthesis pathway (HBP) and enhanced reliance on the HBP  
70 enzyme Glutamine-Fructose-6-Phosphate Transaminase 2 (GFPT2) in KRAS/LKB1 co-mutant tumors.

## 71 **Results**

### 72 **Lkb1 loss alters metabolism of Kras-mutant lung tumors in mice.**

73 We first compared metabolomes between Kras (K), Kras/p53 (KP), and Kras/Lkb1 (KL)-co-mutant lung  
74 tumors and adjacent lung, using autochthonous mouse models from Kwok-Kin Wong's group<sup>1</sup>  
75 (Supplementary Table 1). Supervised analysis produced the largest number of metabolites differing  
76 between KL co-mutant lung tumors and normal lung tissue (Fig 1a). Further, most metabolites that  
77 discriminate between K and KL tumors also discriminated between KP and KL tumors, whereas  
78 metabolites discriminating between K and KP tumors were largely distinct from ones between K and KL.  
79 These data imply that LKB1 mutation imparts a specific metabolomic signature in lung tumors  
80 (Supplementary Data 1a,b).

81 In accordance with results from our previous study on human NSCLC cell lines and tumors<sup>14</sup>, KL co-mutant  
82 tumors had hallmarks of altered metabolism of nitrogen-related pathways; in the current analysis of  
83 murine tumors, these included pathways involving amino acids, pyrimidines and amino sugars/nucleotide  
84 sugars (Fig. 1b and Supplementary Table 2). Direct inspection of individual metabolites related to amino  
85 sugars/nucleotide sugar pathways revealed that several were elevated in KL co-mutant tumors (Fig.1c and  
86 Supplementary Fig. 1c). Primary human KL co-mutant NSCLCs also accumulated amino sugar metabolites  
87 compared to adjacent, non-tumor involved lung tissue (Fig. 1d). Gene sets involved in amino sugar and  
88 nucleotide sugar metabolism, fructose and mannose metabolism, and oxidative phosphorylation were

89 elevated in KL tumors from mice compared with normal lungs (Supplementary Fig. 2a, b). These gene sets,  
90 along with genes related to O-glycan biosynthesis, associated with KL tumors when compared with tumors  
91 containing mutations in *Kras* but not *Lkb1* (Fig. 1e, Supplementary Fig. 2c and Supplementary Tables 3-5).  
92 It is worth noting that although many metabolites discriminating between normal lungs and co-mutant  
93 tumors were shared between humans and mice, mice unlike humans do not induce expression of *CPS1*  
94 mRNA (Supplementary Fig. 3a-c)<sup>14</sup>, indicating incomplete cross-species conservation of metabolic  
95 adaptations in tumors with these mutations. Although sphingolipid metabolism ranks as a highly altered  
96 pathway by metabolomics (Fig. 1b), none of the sphingolipid-related gene sets were associated with KL  
97 status (Supplementary Table 4). Because results from both metabolomics and gene set enrichment  
98 analysis (GSEA) indicate the association of the ‘amino sugar and nucleotide sugar pathway’ and ‘fructose  
99 and mannose metabolism pathway’ with KL co-mutation status, we focused on how these two pathways  
100 impact tumors with KL co-mutation.

#### 101 **The hexosamine biosynthesis pathway is upregulated in KL co-mutants.**

102 Amino sugar/nucleotide sugar metabolism and fructose and mannose metabolism all contribute to the  
103 hexosamine biosynthesis pathway (HBP), which uses glycolytic intermediates (fructose-6-phosphate, F6P),  
104 uridine, acetyl-CoA and glutamine (Fig. 2a and Supplementary Fig. 4a). The first and rate-limiting step is  
105 transfer of the amide nitrogen from glutamine to fructose-6-phosphate by glutamine-fructose-6-  
106 phosphate transaminase (GFPT) to generate glucosamine-6-phosphate (GlcN-6-P). GlcN-6-P is acetylated  
107 to become N-acetyl glucosamine 6-P (GlcNAc-6-P) and then converted to N-acetyl glucosamine 1-P  
108 (GlcNAc-1-P) via a mutase reaction. Finally, it reacts with UTP, forming UDP-N-acetylglucosamine (UDP-  
109 GlcNAc), the end product of this pathway<sup>15</sup>.

110 To examine the HBP in human NSCLC cells, we measured UDP-HexNAc as a surrogate of UDP-GlcNAc.  
111 UDP-GlcNAc is not separated from UDP-GlcNAc in our LC/MS system, although the UDP-HexNAc peak is  
112 almost entirely composed of UDP-GlcNAc<sup>16-18</sup> in a panel of cell lines with either KRAS (K) or KRAS/LKB1 (KL)  
113 mutations. Steady-state levels of UDP-HexNAc were modestly elevated in KL cells (Fig. 2b). The amide  
114 nitrogen donated by glutamine at the GFPT step is transmitted to downstream amino sugar metabolites  
115 including N-acetylmannosamine (ManNAc) and N-acetylneuraminic acid (Neu5Ac) (Supplementary Fig.  
116 4a). To evaluate HBP flow, we measured transfer of <sup>15</sup>N from [amide-<sup>15</sup>N]glutamine ([ $\gamma$ -<sup>15</sup>N]glutamine) to  
117 UDP-HexNAc. After 6hr of incubation with [ $\gamma$ -<sup>15</sup>N]glutamine, KL cells as a group had uniformly high labeling  
118 in HBP intermediates, whereas labeling in K cell lines was heterogenous (Fig. 2c).

119 UDP-GlcNAc is a substrate for post-translational protein modification by glycosylation and the synthesis  
120 of glycolipids, proteoglycans, and glycosylphosphatidylinositol anchors (Fig. 2a and Supplementary Fig.  
121 4a). One of the most common modifications is O-GlcNAcylation of cytoplasmic, nuclear and mitochondrial  
122 proteins to regulate signaling, transcription and other functions<sup>19</sup>. In our cell line panel, KL cells had higher  
123 levels of global O-GlcNAcylation than K cells (Fig. 2d). UDP-GlcNAc is also required for O-linked and N-  
124 linked glycosylation of membrane proteins, especially for both initiation of N-glycosylation in the  
125 endoplasmic reticulum (ER) and N-glycan branching and antenna elongation in the Golgi apparatus<sup>20,21</sup>.  
126 GlcNAc-branched N-glycans are recognized by the lectin phytohemagglutinin-L (L-PHA)<sup>22</sup>, while poly N-  
127 acetylactosamine (polyLacNAc) extension of N-linked glycan antennae is recognized by the lectin  
128 *Lycopersicon esculentum* (LEA). To compare N-linked glycan structures between K and KL cells, we  
129 measured surface binding of L-PHA and LEA by FACS analysis. KL cells displayed enhanced binding of both  
130 L-PHA and LEA (Fig. 2e), indicating more complex glycan structures on their surface glycoproteins. Taken  
131 together, these data suggest that enhanced hexosamine biosynthesis in KL-comutant cancer cells increase  
132 both intracellular O-GlcNAcylation and complex N-Glycan structures on cell surface glycoproteins<sup>23</sup>, which  
133 may contribute to tumor aggressiveness.

#### 134 **LKB1 regulates the hexosamine biosynthesis rate.**

135 We next examined whether LKB1 loss regulates hexosamine metabolism in KRAS-mutant NSCLC cells. To  
136 this end, we engineered two KL cell lines (H460 and H2122) to express wild-type LKB1 (Fig. 3a). Expression  
137 of LKB1 reduced the transfer of <sup>15</sup>N from [ $\gamma$ -<sup>15</sup>N]glutamine into HBP metabolites including GlcNAc-6-P,  
138 UDP-HexNAc, and ManNAc (Fig. 3b). Time course labeling with [ $\gamma$ -<sup>15</sup>N]glutamine also demonstrated  
139 delayed hexosamine biosynthesis (Fig. 3c). Reduced hexosamine biosynthesis in LKB1-expressing cells led  
140 to decreased protein O-GlcNAcylation and decreased complex N-glycan structures on cell surface  
141 glycoproteins (Figs. 3d-f and Supplementary Fig. 4b). Collectively, these data demonstrate that LKB1  
142 suppresses protein glycosylation through mechanisms involving reduced HBP synthesis.

#### 143 **KL cells are selectively vulnerable to GFPT inhibition.**

144 To test whether enhanced hexosamine biosynthesis imposes metabolic liabilities, several K and KL cell  
145 lines were treated with inhibitors of hexosamine biosynthesis and N-linked glycosylation, including  
146 azaserine (GFPT inhibitor), OSMI-1 (O-GlcNAc transferase (OGT) inhibitor) and siRNA against OGT (Fig.4a).  
147 Inhibiting either GFPT or OGT more potently suppressed growth of KL cells (Fig. 4b-d and Supplementary  
148 Fig. 5a-f) although efficiency of OGT silencing or of OSMI-1 treatment was comparable between K and KL

149 cells (Supplementary Fig. 5c,d and f), indicating that KL cells are more dependent on the HBP for survival.  
150 Azaserine treatment also markedly enhanced cell death, but only in KL cells (Supplementary Fig. 6a-c). Of  
151 note, in all four KL cell lines tested, azaserine's toxicity at 0.5 $\mu$ M (the average IC<sub>50</sub> among KL cells) was at  
152 least partially reversed by supplementing with N-acetyl glucosamine (GlcNAc), a metabolite that enters  
153 the HBP at GlcNAc-6-P after phosphorylation by N-acetylglucosamine kinase (NAGK) (Fig. 4a,e). This  
154 finding indicates that in these cells, azaserine's mechanism of action involves HBP suppression. This is  
155 important because azaserine inhibits a number of amidotransferases and other enzymes in addition to  
156 GFPT. Collectively, these data show that KL cells require GFPT and the HBP for survival, and do so to a  
157 greater degree than K cells.

### 158 **KL cells and tumors require GFPT2.**

159 Two GFPT isoforms, GFPT1 and 2, are encoded by separate genes with different tissue distributions<sup>24</sup>, and  
160 either or both of these isoforms could account for azaserine toxicity in KL cells. To identify the target of  
161 azaserine in NSCLC cells, we transfected K and KL cells with siRNAs targeting either GFPT1 or GFPT2. Only  
162 H2122 was affected by GFPT1 silencing (Fig. 5a and Supplementary Fig. 7a). On the other hand, silencing  
163 GFPT2 reduced viability in all KL cell lines tested, but no K cells (Fig.5b and Supplementary Fig. 7b).  
164 Supplementing GlcNAc completely reversed the effects of GFPT2 silencing in H460 KL cells (Fig. 5c). High  
165 levels of *GFPT2* mRNA, but not *GFPT1* mRNA, correlate with poor prognosis in NSCLC cohorts  
166 (Supplementary Fig. 7c,d). GFPT2 protein levels tend to be higher in KL cells while GFPT1 levels are  
167 invariable between K and KL cells (Supplementary Fig.7e,f). H2122, the only cell line to respond to GFPT1  
168 silencing, had the lowest expression of GFPT2 protein. We generated two KL cell lines (H460 and H157)  
169 with doxycycline (Dox)-inducible expression of a CRISPR-Cas9 KO system where Cas9 is induced by Dox  
170 treatment<sup>25</sup> and GFPT2 becomes depleted (Supplementary Fig. 7h). While Dox-mediated GFPT2 depletion  
171 barely affected growth in a monolayer culture, it suppressed anchorage-independent cell growth and  
172 invasion capacity (Fig. 5d,e and Supplementary Fig. 7g). GFPT2 KO clones generated by conventional,  
173 constitutive CRISPR-mediated genome editing<sup>26</sup> decreased both proliferation and colony formation (Fig.  
174 5f,g and Supplementary Fig. 7i,j). Supplementing GlcNAc normalized colony formation and O-  
175 GlcNAcylation in GFPT2 KO cells (Supplementary Fig. 7k,l), as expected if the GFPT2 CRISPR effects are  
176 through HBP suppression. Consistent with this, GFPT2 deletion reduces intracellular levels of HBP  
177 intermediates and N-glycan branching of glycoproteins on the cell surface (Fig. 5h,i and Supplementary  
178 Fig. 7m,n). KL cells reconstituted with LKB1 lost sensitivity to GFPT2 silencing, indicating that dependence  
179 on GFPT2 in KL cells is mediated by LKB1 (Fig. 5j).

180 Next, to examine the effect of GFPT inhibition on tumor growth and in vivo HBP suppression, nude mice  
181 were subcutaneously injected with two KL (A549, H460) and two K cell lines (Calu-1, Calu-6) and treated  
182 with azaserine when palpable tumors were present. Compared with vehicle control, azaserine attenuated  
183 growth of both KL tumor lines, but neither K tumor line (Fig. 6a and Supplementary Fig. 8a,b). We then  
184 examined turnover of HBP metabolites by infusing mice bearing subcutaneous A549 xenografts with [ $\gamma$ -  
185  $^{15}\text{N}$ ]glutamine after two weeks of vehicle control or azaserine treatment. Tumors from the azaserine-  
186 treated mice displayed lower incorporation of  $^{15}\text{N}$  into GlcNAc-6-P and UDP-HexNAc (m+1 labeling)  
187 compared with those from control mice (Fig. 6b). Consistent with the in vivo infusions, targeted  
188 metabolomics of two KL tumors revealed depletion of several HBP intermediates in azaserine-treated  
189 tumors (Fig. 6c).

190 We also assessed the effect of conditional GFPT2 CRISPR on tumor growth. Nude mice were injected  
191 subcutaneously with two KL cell lines (H460, H157) and one K cell line (Calu-1) expressing sgGFPT2 and  
192 treated with or without Dox. Dox induction of Cas9-mediated GFPT2 KO reduced tumor growth in H460  
193 and H157, but not Calu-1 (Fig. 6d and Supplementary Fig. 8c-e). Tumor growth suppression was also  
194 observed after constitutive CRISPR-mediated GFPT2 loss in H460 cells (Fig. 6e and Supplementary Fig. 8f).

195 Finally, to assess the efficacy of HBP suppression in genetically engineered mouse models with  
196 autochthonous NSCLC and an intact immune system, we used mice with a genotype of  
197  $Kras^{G12D/wt}/Lkb1^{LoxP/LoxP1}$ . At 4-5 weeks after inhalation of an Ad5-CMV-Cre, when tumor burden reaches  
198 ~5% of the total pulmonary volume<sup>27,28</sup>, the mice were randomized to receive vehicle or azaserine  
199 (2.5mg/kg every other day, 6-7 times total). Mice were euthanized after the final treatment and lung  
200 tumor tissues were analyzed histologically. Azaserine monotherapy reduced tumor burden relative to  
201 total lung volume (Fig. 6f,g).

## 202 Discussion

203 The simultaneous incidence of oncogenic KRAS and loss of LKB1 has been shown to specify aggressive  
204 oncological behavior both in mouse models of lung cancer and human patients. In this study, we provide  
205 evidence that KL tumor aggressiveness is associated with dependence on the HBP through GFPT2  
206 (Supplementary Fig. 9). LKB1 loss in the context of oncogenic KRAS plays a prominent role in the flux of  
207 glutamine into the HBP through GFPT2, the rate-limiting step of the HBP. GFPT also feeds the glutamate  
208 pool, which may complement glutaminase's contribution to anaplerosis. In pancreatic ductal  
209 adenocarcinoma (PDAC), oncogenic KRAS mutation stimulates glucose-dependent biosynthetic pathways



210 including the HBP<sup>6</sup>. Ras oncogenes have been shown to induce N-glycosylation and oncogenic KRAS is  
211 associated with complex N-glycan structures in colorectal cancer cells<sup>29,30</sup>. In line with these previous  
212 findings, our GSEA of metabolic gene transcript profiles from normal lung tissues versus KRAS mutant lung  
213 tumors also returned “fructose and mannose metabolism,” a gene set related to the HBP, as highly  
214 associated with KRAS mutation status. When we compared KL co-mutant lung tumors with KRAS tumors,  
215 however, the association of genes in HBP-related pathways was even stronger in the co-mutants. This is  
216 consistent with the elevated rate of <sup>15</sup>N entry into HBP metabolites in KL co-mutant cells, suppression of  
217 this activity by LKB1, and increased sensitivity to GFPT inhibition in commutant cells and tumors. Thus,  
218 our data collectively suggest that, at least in NSCLC, LKB1 loss in the context of oncogenic KRAS alters  
219 metabolic preferences, rendering cancer cells dependent on the HBP and subsequent glycosylation  
220 pathways.

221 Another difference between PDAC and NSCLC is related to isoform specificity of HBP dependence. GFPT2  
222 and GFPT1 both catalyze the entry step into the HBP. In PDAC, GFPT1 is required for glycosylation and  
223 KRAS regulates GFPT1 expression<sup>31</sup>. In our study, however, GFPT1 silencing barely impacted NSCLC cell  
224 survival regardless of their mutation status, and expression of *GFPT2* but not *GFPT1* correlated with poor  
225 clinical outcomes in LUAD. The reason for this isoform specificity is unknown, but may involve its  
226 association with the epithelial-mesenchymal transition (EMT). EMT transcription factors *SNAI1* and  
227 *TWIST1* are highly correlated with *GFPT2*, but not *GFPT1*, in clinical lung adenocarcinoma samples<sup>32</sup>.  
228 Upregulation of *GFPT2* expression was observed in transcriptomic signatures of both mesenchymal lung  
229 tumors in mice and the mesenchymal, or claudin-low, subtype of triple-negative breast cancer<sup>13,32</sup>. Given  
230 that KL co-mutants emulate claudin-low breast cancer, which are aggressively metastatic tumors enriched  
231 with self-renewing tumor-initiating cells<sup>33</sup>, and that *GFPT2*, not *GFPT1*, is one of the 10 upregulated,  
232 claudin-low signature genes found in KL NSCLC<sup>13</sup>, our current findings imply that GFPT2, not GFPT1, is  
233 associated with tumor aggressiveness in lung cancer.

234 We demonstrated that LKB1 loss is required for GFPT2 addiction in KRAS-mutant NSCLC. To fully  
235 understand the mechanism by which LKB1 inhibits GFPT2, further work will be required. AMPK is a major  
236 metabolic effector and it has been reported to inhibit GFPT1 enzyme activity by phosphorylation<sup>34</sup>. This  
237 raises the possibility that AMPK may also be involved in GFPT2 regulation. It will be worthwhile to  
238 investigate how GFPT2 activity is perturbed by LKB1, either transcriptionally, translationally, or post-  
239 translationally, and which downstream effectors are required to regulate GFPT2.



240 There are no clinically-approved drugs to inhibit GFPT2 in a well-tolerated manner. Although we found  
241 that azaserine selectively reduces viability of KL co-mutant cells, this compound also inhibits purine  
242 biosynthesis and other pathways<sup>35</sup>. Prolonged treatment of azaserine (> 3weeks) induces tumor growth  
243 in rats<sup>36</sup>. UDP-GlcNAc, a major end product of the HBP, is required for both glycosylation of membrane  
244 proteins and O-GlcNAcylation of intracellular proteins. Thus, inhibiting these glyco-functionalization  
245 pathways may mimic azaserine treatment. A recent study reported that FR054, a specific inhibitor of the  
246 HBP enzyme N-acetylglucosamine-phosphate mutase (PGM3), has an anti-breast cancer effect both in  
247 vitro and in vivo and is relatively well tolerated<sup>37</sup>. PGM3 catalyzes the conversion of GlcNAc-6-P into  
248 GlcNAc-1-P. Its modulation permits control of both O-GlcNAcylation and glycosylation, and PGM3  
249 inhibition reduces HBP flux and levels of complex N-glycans and O-GlcNAcylation. FR054 treatment may  
250 phenocopy GFPT2 suppression and have therapeutic potential for KL co-mutant tumors. It will also be  
251 interesting to determine whether HBP inhibition synergizes with other metabolic or cytotoxic therapies in  
252 NSCLC.

253 We previously reported that the urea cycle enzyme carbamoyl phosphate synthetase 1 (CPS1) provides  
254 an alternative pool of carbamoyl phosphate to maintain pyrimidine availability and supports survival of  
255 KL NSCLC. Our current study demonstrates the significance of GFPT2 in the HBP, another nitrogen-related  
256 metabolic pathway, in this aggressive subtype of lung cancer. O-GlcNAcylation, functional consequence  
257 of the HBP, can stabilize proteins involved in tumorigenic processes such as c-Myc and  $\beta$ -catenin<sup>38,39</sup>.  
258 Glycan modification, another arm of the HBP-mediated protein modification, modulates receptor tyrosine  
259 kinases, proteoglycans, cadherins and integrins, which contribute to malignant cells' ability to invade,  
260 migrate and metastasize<sup>40,41</sup>. Upregulation of the HBP in KL co-mutants, therefore, may not only be  
261 required for primary cancer growth but also for tumor aggressiveness. The fact that cells with mutation  
262 of either KRAS or LKB1 do not require GFPT2 suggests that the metabolic effects mediated by KL co-  
263 mutations are essential for GFPT2 addiction. One possible explanation would be that enhanced glucose  
264 and glutamine uptake by oncogenic KRAS might provide ample supply for the HBP while LKB1 loss  
265 enhances the HBP through GFPT2 (Supplementary Fig. 9). Collectively, our findings suggest the use of  
266 GFPT2 or related pathway components as therapeutic targets in KL mutant lung adenocarcinomas,  
267 providing a new mechanism of oncogene addiction.

## 268 **Acknowledgment**

269 R.J.D. is supported by the Howard Hughes Medical Institute and by grants from the National Cancer  
270 Institute (NCI) (R35CA22044901) and the Cancer Prevention and Research Institute of TEXAS (CPRIT)

271 (RP160089). J.K. (UIC) is supported by the NCI (1K22CA226676-01A1), American Lung Association (LCD-  
272 614827) and the V Foundation (V2019-022). J.D.M. is supported by the NCI (SPORE P50CA070907) and  
273 CPRIT (RP160652). J.K. (UTSW) is supported by NCI (1R01CA196851, SPORE P50CA70907) and the  
274 American Cancer Society (RSG-16-090-01-TBG). S.K. was supported by the National Heart, Lung, and Blood  
275 Institute (5T32HL098040).

276

277 R.J.D. is an advisor for Agios Pharmaceuticals. J.D.M. receives cell line licensing royalties from the NIH and  
278 UTSW.

279

## 280 **Figure Legends**

281 **Figure 1. Altered hexosamine metabolism in KL mouse tumors.** **a**, Venn diagrams of Variable Importance  
282 in the Projection metabolites (VIP>1.0) between normal lung (NL) and tumor tissues with different  
283 genotypes. K, Kras mutant tumor; KP, Kras/p53 mutant tumor; KL, Kras/Lkb1 tumor. **b**, Pathway analysis  
284 based on metabolites differentiating between normal lung tissues and KL tumor tissues (VIP>1.0).  
285 Darkness and size of the dot represents statistical significance of the pathway. Metabolic pathways first  
286 observed in the current metabolomics data as opposed to our previous analysis of human tumors<sup>14</sup> are in  
287 red. **c**, Abundance of metabolites in amino sugar and nucleotide sugar metabolism and fructose and  
288 mannose metabolism in normal mouse lung tissues (normal) and KL tumor tissues. Individual data points  
289 are shown with mean values and SD for six normal and ten KL tissues. **d**, Abundance of metabolites in  
290 amino sugar and nucleotide sugar metabolism and fructose and mannose metabolism in normal human  
291 lung tissues (normal) and KL tumor tissues. Individual data points are shown with mean values and SD for  
292 18 normal sections and 15 KL tumor sections used in the previous paper<sup>14</sup>. **e**, Enriched KEGG pathways  
293 were identified using GSEA against C2 pathways of the MSig database<sup>42</sup> in the KL mouse tumors compared  
294 with matched normal tissues. The top three enriched pathways from the analysis are represented. Their  
295 leading-edge genes are shown in Supplementary Fig. 2c and the complete list (FDR q-val <0.05) is available  
296 in Supplementary Table 3. Statistical significance was assessed using two-tailed Student's t-test (c) and (d).  
297 \*\*p<0.01; \*\*\*\* p<0.0001. Metabolomics was performed once.

298 **Figure 2. The hexosamine biosynthesis pathway is upregulated in KL cells.** **a**, Schematic of the  
299 hexosamine biosynthesis pathway (HBP). Metabolites in the glycosylation pathway are in lilac and O-  
300 GlcNAcylation is in light blue. Schematic of <sup>15</sup>N incorporation from [ $\gamma$ -<sup>15</sup>N]glutamine into the HBP

301 intermediates is shown in Supplementary Fig. 4a. **b**, Abundance of UDP-HexNAc in K and KL cell lines.  
302 AUC= area under the curve. Individual data points represent replicates from each cell line and are shown  
303 with mean values and SD for five K and KL cell lines. Three replicates were analyzed for each cell line,  
304 except for H441 and H358, for which two replicates were analyzed. **c**,  $^{15}\text{N}$  labeling in UDP-HexNAc,  
305 ManNAc, and Neu5Ac in K and KL cells cultured with  $[\gamma\text{-}^{15}\text{N}]$ glutamine containing media for 6 hours.  
306 Individual data points represent the average value of each cell line (3 replicates/cell line). **d**, *Left*, Global  
307 O-GlcNAcylation in K and KL cells. Human bronchial epithelial cell line HBEC51 is used as control. *Right*,  
308 Quantification of O-GlcNAcylation normalized by actin levels. **e**, Cell surface L-PHA and LEA lectin binding  
309 in K and KL cells was measured by flow cytometry. Statistical significance was assessed using two-tailed  
310 Student's t-test (b), (c), (d), and (e). In **c**, statistical analysis was done with individual replicate of each cell  
311 lines (n=3/each cell line). \*p<0.05; \*\*p<0.01; \*\*\*p < 0.001; \*\*\*\*p<0.0001. In targeted metabolomics,  
312 single time point stable isotope labeling for ManNAc and Neu5Ac was performed once, and single time  
313 point stable isotope labeling for UDP-HexNAc was performed twice. Western blots were repeated three  
314 times or more. FACS analyses were performed twice.

315 **Figure 3. LKB1 regulates the hexosamine biosynthesis pathway.** **a**, LKB1 re-expression in H460 and H2122,  
316 two KL cells. Cyclophilin B (CB) is used as loading control. **b**,  $^{15}\text{N}$  labeling in GlcNAc-6-P, UDP-HexNAc and  
317 ManNAc in empty vector (EV) control and wildtype LKB1 (LKB1) expressing H460 and H2122 cells cultured  
318 with  $[\gamma\text{-}^{15}\text{N}]$ glutamine. **c**, Time-course of  $^{15}\text{N}$  labeling in UDP-HexNAc in EV and LKB1 expressing H460 cells  
319 cultured with  $[\gamma\text{-}^{15}\text{N}]$ glutamine. **d**, *Left*, Global O-GlcNAcylation in EV and LKB1 expressing H460 and H2122  
320 cells. *Right*, Relative intensity of O-GlcNAcylation (in red bracket) to a loading control (cyclophilin B, CB).  
321 **e**, Cell surface LEA lectin binding in EV and LKB1-expressing H460 and H2122 cells was measured by flow  
322 cytometry. **f**, Cell surface L-PHA lectin binding in EV and LKB1 expressing H460 and H2122 cells was  
323 measured by flow cytometry. Data in **b** and **c** are the average and SD of three independent cultures. In  
324 **b,e,f**, statistical significance was assessed using two-tailed Student's t-test. In **c**, to calculate significance  
325 on repeated measurements over time, two-way ANOVA was used. Stable isotope experiments and O-  
326 GlcNAcylation western blotting were repeated twice. All other experiments were repeated three times or  
327 more. \*p<0.05; \*\*p<0.01; \*\*\*p<0.005.

328 **Figure 4. KL cells are dependent on the rate limiting step of the hexosamine biosynthesis pathway.** **a**,  
329 Schematic of the hexosamine biosynthesis pathway. Enzyme/pathway targeted by each inhibitor and  
330 siRNA is shown. **b**, Relative viability of a panel of K and KL lines following a 72hr exposure to OSMI-1  
331 (25 $\mu\text{M}$ ). **c**, Relative viability of K and KL lines to OGT silencing for 96hr. **d**, Dose-response curves for K and

332 KL lines following 72hr exposure to azaserine. **e**, Effect of GlcNAc (40mM) on azaserine (0.5 $\mu$ M)-treated  
333 KL cells (four cell lines, n=6/line). Data are average and SD of three or more independent cultures.  
334 Statistical significance was assessed using unpaired t-test with Welch's correction (**b,c**), Mann-Whitney U  
335 test (**d**), two-tailed Student's t-tests (**e**); \*\*p<0.01; \*\*\*\*p<0.0001. Cell viability assay of OSMI-1 and dose-  
336 response assay were performed three times or more. OGT silencing assay and viability assay with  
337 azaserine treatment in the presence or absence of GlcNAc were repeated twice.

338 **Figure 5. KL cells require GFPT2. a and b**, Sensitivity to GFPT1 (**a**) and GFPT2 (**b**) silencing in K and KL cells  
339 (n = 6). **c**, Rescue effect of GlcNAc supplementation on GFPT2 silencing-induced cell death (n=6). **d**, Effects  
340 of a Dox-induced GFPT2 sgRNA (GFPT2) on anchorage independent growth of H460 and H157 (n = 3 for  
341 H157, n=4 for H460). Gal4 is a Dox-inducible control sgRNA. **e**, Effects of Dox-induced GFPT2 KO on  
342 invasion capacity of H460 and H157 cells (n=4 for H460-sgGal4-/+ Dox, n=8 for H460-sgGFPT2-/+Dox, n=12  
343 for H157 GFPT2-Dox and H157-Gal4-Dox, n=8 for H157 GFPT2+Dox, n=7 for H157-Gal4+Dox). **f**,  
344 Abundance of GFPT1 and 2 in parental and GFPT2 KO H460 cells. Actin was used as a loading control. **g**,  
345 Effects of GFPT2 KO (two clones) on anchorage independent growth of H460. **h**, Abundance of hexosamine  
346 metabolites in Dox-inducible GFPT2 KO H460 cells (n=3). sgGal4 is used as a Dox-inducible sgRNA control.  
347 **i**, Effect of Dox-inducible GFPT2 KO H460 cells on cell surface L-PHA lectin binding. **j**, Effect of LKB1 on  
348 GFPT2 silencing-induced loss of viability (n=5). In **b, d, e, g, h, and i**, statistical significance was assessed  
349 using two-tailed Student's t-test. In **c** and **j**, statistical significance was assessed using one-way ANOVA  
350 followed by Tukey's post hoc test was used. In **c**, \*, p<0.05 comparing to sieGFP without GlcNAc; #, p<0.05  
351 comparing to sieGFP with GlcNAc treatment; \$ p<0.05 comparing to siGFPT2 with GlcNAc treatment.  
352 \*p<0.05; \*\*p<0.01; \*\*\*\*p<0.0001. Western blot was repeated three times and all other experiments  
353 were performed twice.

354 **Figure 6. GFPT2 suppression inhibits KL tumor growth. a, Top**, growth of A549 (left) and H460 (right)  
355 xenografts in presence and absence of azaserine (2.5mg/kg, qod for 6-7 times total, arrows indicate when  
356 azaserine was injected). *Bottom*, growth of Calu-1 (left) and Calu-6 (right) xenograft in presence and  
357 absence of azaserine. Mean tumor volume and SD are shown for each group (n=4 for A549, n=4 for H460,  
358 n=5 for both Calu-1 and Calu-6. Combined results from two independent H460 xenograft experiments  
359 (total n=8) are shown here). **b**, <sup>15</sup>N labeling in GlcNAc-6-P (top) and UDP-HexNAc (bottom) in mice bearing  
360 A549 treated (purple) or non-treated (turquoise) with azaserine. **c**, Abundance of hexosamine metabolites  
361 in A549 (first three panels) and H460 (last three panels) xenografts in Fig. 6a. AUC/TIC=Area under the  
362 curve/total ion count. Individual data points are shown with mean values and SD for 12 sections (three

363 fragments per tumor). **d**, Growth of Dox-inducible GFPT2 KO H460 (left) and H157 (right) xenografts in  
364 presence and absence of Dox. Mean tumor volume and SEM are shown for each group (n=5 per group).  
365 **e**, Growth of H460 WT or GFPT2 KO (two different clones) xenografts. Mean tumor volume and SEM are  
366 shown for each group (n=5 per group). **f**, Representative images of non-treated KL mice (upper panel,  
367 total 7 mice) and azaserine treated mice (lower panel, total 6 mice). Numbering is [mouse identification]-  
368 [image #]. **g**, Tumor area from Fig. 6f was quantified with imageJ and % of tumor burden out of total lung  
369 was analyzed. 39 images from non-treated mice and 34 images from azaserine-treated mice were used  
370 for quantification. Significance was assessed using two-tailed Student's t-tests (**b**, **c**, **g**); two-way ANOVA  
371 with Sidak's multiple comparisons test (**a,d**); two-way ANOVA with Tukey's multiple comparisons (**e**).  
372 \*p<0.05; \*\*p<0.01; \*\*\*\*p<0.0001. Tumor growth studies in **e** and **f**, in vivo infusion in **b**, and targeted  
373 metabolomics in **c** were performed once. Tumor growth study in **a** and **d** were repeated twice.

#### 374 **Supplementary Information**

#### 375 **Legends to Supplementary Data Figures**

376 **Supplementary Data Fig. 1. Lkb1 mutation significantly alters metabolism of Kras mutant mouse lung**  
377 **tumor while p53 mutation does not.** **a**, Key metabolites differentiating between Kras (K) and Kras/Lkb1  
378 (KL) tumors (left), Kras/Lkb1 (KL) and Kras/p53 (KP) tumors (middle) and Kras (K) and Kras/p53 (KP) tumors  
379 (right) (VIP>~ 1.5). Metabolites shown in all three groups are in red. Relative metabolite abundance is  
380 indicated in the bar, with red representing metabolite accumulation. **b**, Venn diagrams of Variable  
381 Importance in the Projection metabolites (VIP>1.0) between [K and KL tumor tissues] and [KP and KL  
382 tumor tissues] (left) and between [K and KP tumor tissues] and [K and KL tumor tissues]. **c**, Abundance of  
383 fructose and mannose pathway intermediates from the metabolomics in Supplementary Data Fig. 1a.  
384 Individual data points are shown with mean values and SD for six (normal) or ten (KL) mouse tumors.  
385 Statistical significance was assessed using Wilcoxon signed rank test. \*p<0.05; \*\*p<0.01.

386 **Supplementary Data Fig. 2. Hexosamine-related metabolic pathways are associated with KL mouse**  
387 **tumors.** **a**, GSEA returned "Amino sugar and nucleotide metabolism", "Fructose and mannose  
388 metabolism", and "Oxidative Phosphorylation" as the top ranked metabolic gene ontology term from  
389 KEGG database. Enrichment statistics include nominal p value and nominal enrichment score (NES). **b**, The  
390 leading-edge genes of "Aminosugar and nucleotide sugar metabolism" (left) and "Fructose and mannose  
391 metabolism" (right) are in Supplementary Data Fig 2a. The leading-edge genes of "Oxidative  
392 Phosphorylation" (not displayed here) are in Supplementary information table 3. **c**, The leading-edge

393 genes of “Aminosugar and nucleotide sugar metabolism”, “Fructose and mannose metabolism” and “O-  
394 Glycan biosynthesis” in Fig. 1e.

395  
396 **Supplementary Data Fig. 3. Mouse KL tumors do not display CPS1 induction.** **a**, RNAseq result for CPS1  
397 in mouse lung and mouse tumors of the indicated genotypes. Data are the average and SD of tissues from  
398 three independent mice except Kras mice (n=2). **b**, CPS1 expression in the tissues used in Supplementary  
399 Data Fig. 2a. q-rt-PCR Data are the average and SD of three fragments from three independent mice except  
400 Kras mice (three fragments from two mice). **c**, CPS protein expression in the tissues used in Supplementary  
401 Fig. 2b. Statistical significance was assessed using one-way ANOVA followed by Tukey’s post hoc test was  
402 used and there was no statistical significance among the groups.

403 **Supplementary Data Fig. 4.** Schematic of the hexosamine biosynthesis pathway and <sup>15</sup>N incorporation  
404 from [ $\gamma$ -<sup>15</sup>N]glutamine (labeled in pink) into the HBP intermediates is shown. **b**, Relative intensity of O-  
405 GlcNAcylation to loading control in H2122 cells; O-GlcNAcylation signal was derived from the bracketed  
406 region of the blot in Fig. 3d.

407 **Supplementary Data Fig. 5. KL cells are sensitive to inhibition of the HBP.** **a**, Abundance of OGT protein  
408 in K and KL cell lines transfected with a control siRNA or siRNA directed against OGT. Actin is used as a  
409 loading control. **b**, Effect of OGT silencing on global O-GlcNAcylation of K and KL cells. **c**, Effect of OSMI-1  
410 treatment on global O-GlcNAcylation of K and KL cells. Actin is used as a loading control. All Western blots  
411 are repeated three times or more.

412 **Supplementary Data Fig. 6. KL cells are sensitive to inhibition of GFPT activity.** **a**, Effect of azaserine  
413 treatment (1 $\mu$ M) on K and KL cells’ viability (14 cell lines, n=6). Data are the average and SD of six  
414 independent cultures. **b**, Effect of azaserine treatment on cell death in K and KL cells (n=3). **c**, Effect of  
415 azaserine treatment on global O-GlcNAcylation of K and KL cells. Actin is used as a loading control.  
416 Statistical significance was assessed using two-tailed Student’s t-tests after combining data points from  
417 all the KL and K cells. \*\*\*\*p<0.0001. Cell viability assay and Western blots are repeated at least twice.  
418 FACS analysis is performed once.

419 **Supplementary Data Fig. 7. KL cells are sensitive to inhibition of GFPT2.** **a**, Abundance of GFPT1 protein  
420 in cell lines transfected with a control esiRNA or esiRNA directed against GFPT1. Actin is used as a loading  
421 control. **b**, Abundance of GFPT2 protein in cell lines transfected with a control esiRNA or esiRNA directed  
422 against GFPT2. Actin is used as a loading control. **c**, Kaplan–Meier plot associating *GFPT1* mRNA expression



423 with survival. Dataset is from KM Plotter (<http://kmplot.com/analysis/index.php?p=service&cancer=lung>).  
424 **d**, Kaplan–Meier plot associating *GFPT2* mRNA expression with survival. **e**, Abundance of GFPT1 in a panel  
425 of K and KL cells. Actin is used as a loading control. **f**, Abundance of GFPT2 in a panel of K and KL cells.  
426 Actin is used as a loading control. **g**, Effect of Dox-induced GFPT2 deletion on growth in a monolayer  
427 culture. Data are the average and SD of 6 replicates. **h**, Abundance of GFPT2 in Dox-inducible GFPT2 KO  
428 H157 (left) and H460 (right) cells with or without Dox induction. Actin is used as a loading control. **i**,  
429 Representative images of colonies grown in soft agar in Fig. 5**g**. **j**, Effects of a GFPT2 KO on cell proliferation  
430 (H460 cells, n = 5). **k**, Effect of GlcNAc on anchorage-independent growth of GFPT2 KO cells. **l**, Global O-  
431 GlcNAcylation of GFPT2 WT, KO and KO treated with GlcNAc. **m**, Abundance of GlcNAc-6-P and ManNAc  
432 in Dox-inducible GFPT2 KO H157 cells (n=3). **n**, Effect of Dox-inducible GFPT2 KO H157 cells on cell surface  
433 L-PHA lectin binding. Statistical significance in **g**, **j**, **m**, and **n** was assessed using two-tailed Student's t-  
434 tests. In **j**, to calculate significance on repeated measurements over time, a two-way ANOVA with Tukey's  
435 post hoc test was used. In **k**, statistical significance was assessed using one-way ANOVA with Tukey post  
436 hoc test. \*p<0.05, \*\*p<0.01, \*\*\*p<0.005. Targeted metabolomics was performed once. Soft agar assay,  
437 monolayer cell growth, GFPT1 and 2, and O-GlcNAcylation western blotting were assayed twice. All  
438 experiments were repeated three times or more.

439 **Supplementary Data Fig. 8. GFPT2 suppression inhibits KL tumor growth.** **a**, Global O-GlcNAcylation in  
440 A549 (left) and H460 (right) xenografts in presence and absence of azaserine. Actin was used as a loading  
441 control. **b**, Global O-GlcNAcylation in Calu-1 (left) and Calu-6 (right) xenografts in presence and absence  
442 of azaserine. Actin was used as a loading control. **c**, Abundance of GFPT2 protein in Dox-inducible GFPT2  
443 KO H460 (left) and H157 (right) xenografts with or without Dox induction. Actin was used as a loading  
444 control. **d**, Growth of Dox-inducible GFPT2 KO Calu-1 xenografts in presence and absence of Dox. Mean  
445 tumor volume and SEM are shown for each group (n=5 for GFPT2-Dox, n=4 for GFPT2+Dox). **e**, Abundance  
446 of GFPT2 protein in Dox-inducible GFPT2 KO Calu-1 xenografts with or without Dox induction. Actin was  
447 used as a loading control. **f**, Abundance of GFPT2 protein in GFPT2 WT and KO (two independent clones)  
448 H460 xenografts with or without Dox induction. Note that only three mice bearing KO #2 cells developed  
449 tumors. Actin was used as a loading control. Statistical significance was assessed using two-way ANOVA  
450 followed by Sidak's multiple comparisons test. Mouse experiments were performed once. Western blots  
451 were repeated twice.

452 **Supplementary Data Fig. 9.** Illustration of the HBP and tricarboxylic acid (TCA) cycle. Metabolic alterations  
453 mediated by concurrent mutations of KRAS and LKB1 render cells dependent on GFPT2 for hexosamine



454 synthesis. Uptake of glucose and glutamine is elevated by mutant KRAS, establishing the environment  
455 favoring hexosamine synthesis. LKB1 loss in the context of KRAS mutation then enhances HBP through  
456 GFPT2. Increased GFPT2 activity may also contribute to the glutamate pool for anaplerosis in the  
457 mitochondria.  $\alpha$  KG,  $\alpha$ -ketoglutaric acid.

458

459 **Supplementary Data Table 1. Metabolomics in GEMM tissues.** A set of 305 metabolites was monitored  
460 in 10 tumor tissues/genotype and 6 normal lung tissues (see row labeled “Class”).

461 **Supplementary Information Table 2: Variable Importance in the Projection (VIP) analysis of**  
462 **metabolomic differences between tissues.** Primary data used in the analysis are in Supplementary  
463 Information Table 1.

464 **Supplementary Information Table 3: RNA seq analysis of mouse normal lung and tumor tissues.** mRNA  
465 expression of 2602 metabolic genes are shown.

466 **Supplementary Information Table 4: Gene Set Enrichment Analysis (GSEA) using mouse normal lung and**  
467 **tumor tissues.** Primary data used in the analysis are in Supplementary Information Table 3.

468 **Supplementary Information Table 5: Leading-edge gene rank of GSEA results.** Leading-edge gene ranks  
469 from Supplementary Information Table 4 are shown.

470 **Supplementary Information Table 6: Information about genetically engineered mouse model (GEMM).**  
471 Sex, date of birth (DOB), body weight at the time of treatment are listed.

## 472 **Methods**

473 **Cell lines, Culture, and Reagents.** All NSCLC cell lines (A549, H1355, Hcc515, H157, H2122, H2030, H460,  
474 DFCI-024, H1155, H1373, H2347, H358, H441, H1792, H2291, Calu-1, Calu-6) used in this study were  
475 obtained from the Hamon Cancer Center Collection (University of Texas–Southwestern Medical Center).  
476 Cells were maintained in RPMI-1640 supplemented with penicillin/streptomycin, and 5% fetal bovine  
477 serum (FBS) at 37°C in a humidified atmosphere containing 5% CO<sub>2</sub> and 95% air. All cell lines have been  
478 DNA fingerprinted for provenance using the PowerPlex 1.2 kit (Promega) and were mycoplasma free using  
479 the e-Myco kit (Bulldog Bio). H460- and H2122-EV, -LKB1 WT were generated as described previously  
480 (CPS1 paper). pBABE-FLAG-LKB1 WT were from Lewis Cantley (Addgene plasmid #8592). GFPT2-deficient  
481 H460 clones for population doubling, colony formation, mouse xenograft assays were generated using the  
482 original CRISPR-Cas9 system<sup>43</sup>. To generate inducible CRISPR-Cas9 GFPT2 KO cell lines, parental cells (H460,

483 H157, Calu-1) were first infected by pCW-Cas9 plasmid (Addgene plasmid #50661), sorted by puromycin  
484 selection. Stable integrants were then further infected by modified lentiGuide-puro plasmid (Addgene  
485 plasmid # 52963) whose original puro selection marker is replaced with ZSGreen1 which is  
486 amplified from pLVX-EF1a-IRES-zsGreen1 (Clontech: Catalog No. 631982). lentiGuide-ZSGreen1  
487 expressing sgRNA targeting yeast Gal4 as negative control or sgRNAs targeting GFPT2, and stable  
488 integrants were obtained by flow cytometry (FACS Aria II SORP). The primers used to generate sgGFPT2  
489 constructs were as follows:

490 sgGFPT2-#1 forward, 5-CACCGTACAGAGGCTACGACTCGGC-3,

491 sgGFPT2-#2 forward, 5-CACCGACTACAGAGTCCCCGGACG-3,

492 sgGFPT2-#1 forward, 5-CACCGTCGGCATTGCCACACGCGC-3,

493 sgGFPT2-#1 forward, 5-CACCGAGACAGCATGGACTTAAAAG-3.

494 Doxycycline was from Research Products International (RPI), N-Acetyl glucosamine (GlcNAc), azaserine,  
495 OSMI-1, and cisplatin were from Sigma-Aldrich.

496 **Metabolomics.** Mouse tissue metabolomics was performed by Metabolon, Inc. Data from human tissues  
497 were retrieved from a previous study<sup>14</sup>. NSCLC cell lines were plated at  $3-5 \times 10^6$  cells per 10 cm plate for  
498 16hr prior to harvest. Two hours before harvest, cells were incubated with fresh media. At the time of  
499 harvest, cells were washed with ice-cold saline, lysed with 80% methanol in water and quickly scraped  
500 into an Eppendorf tube followed by three freeze-thaw cycles in liquid nitrogen. The insoluble material  
501 was pelleted in a cooled centrifuge (4 °C) and the supernatant was transferred to a new tube and  
502 evaporated to dryness using a SpeedVac concentrator (Thermo Savant). Metabolites were reconstituted  
503 in 100  $\mu$ l of 0.03% formic acid in LCMS-grade water, vortex-mixed, and centrifuged to remove debris. For  
504 human NSCLC metabolomics, frozen tissues were weighed and divided into 3-9 fragments (~3mg/each  
505 fragment) for technical replicates. Fragments were homogenized in 80% methanol in water and  
506 centrifuged at 14,000g for 15 minutes (4 °C). The supernatant was transferred to a new tube and  
507 evaporated to dryness as described above for cell lysates. Samples were randomized and blinded prior to  
508 analyzing by LC/MS/MS. LC/MS/MS and data acquisition were performed using an AB QTRAP 5500 liquid  
509 chromatograph/triple quadrupole mass spectrometer (Applied Biosystems SCIEX, Foster City, CA) as  
510 described previously<sup>44</sup> with injection volume of 20  $\mu$ L. Chromatogram review and peak area integration  
511 were performed using MultiQuant software version 2.1 (Applied Biosystems SCIEX, Foster City, CA), and

512 the peak area for each detected metabolite was normalized against the total ion count (TIC) of that sample  
513 to correct any variations introduced from sample handling through instrument analysis. The normalized  
514 areas were used as variables for the multivariate and univariate statistical data analysis. All multivariate  
515 analyses and modeling on the normalized data were carried out using Metaboanalyst 4.0  
516 (<http://www.metaboanalyst.ca>). Univariate statistical differences of the metabolites between two groups  
517 were analyzed using two-tailed Student's *t*-test.

518 **<sup>15</sup>N glutamine labeling.** Cells were plated at  $3 \times 10^6$  cells per 10cm plate for 16hr prior to labeling. The  
519 next day, cells were incubated in labeling media containing 2 mM [ $\gamma$ -<sup>15</sup>N]glutamine for 6hr before harvest.  
520 At the time of harvest, the cells were washed with ice-cold saline, lysed with 80% methanol: 20% water  
521 and processed as described above (Metabolomics). Metabolites were reconstituted in 100  $\mu$ l of 0.1%  
522 formic acid in LCMS-grade water, vortex-mixed, and centrifuged to remove debris. Samples were  
523 randomized and blinded prior to analyzing by LC/MS/MS. LC/MS/MS was performed on an AB SCIEX 5500  
524 QTRAP liquid chromatography/mass spectrometer (Applied Biosystems SCIEX), equipped with a vacuum  
525 degasser, a quaternary pump, an autosampler, a thermostatted column compartment, and a triple  
526 quadrupole/ion-trap mass spectrometer with electrospray ionization interface, controlled by AB SCIEX  
527 Analyst 1.6.1 Software. SeQuant® ZIC®-pHILIC (150mm $\times$ 2.1mm, 5 $\mu$ m) PEEK coated column was used.  
528 Solvents for the mobile phase were 10mM NH<sub>4</sub>Ac in H<sub>2</sub>O (pH = 9.8, adjusted with conc. NH<sub>4</sub>OH) (A) and  
529 acetonitrile (B). The gradient elution was: 0–15 min, linear gradient 90–30% B; 15–18 min, 30% B, 18–19  
530 min, linear gradient 30–90% B; and finally reconditioning it for 9 min using 90% B. The flow-rate was 0.25  
531 ml/min, and injection volume was 20  $\mu$ L. Columns were operated at 35°C. Declustering potential (DP),  
532 collision energy (CE) and Collision Cell Exit Potential (CXP) were optimized for each metabolite by direct  
533 infusion of reference standards using a syringe pump prior to sample analysis. MRM data were acquired  
534 with the following transitions: hexosamine-6-phosphate: 258/79 (CE, -40V); N-acetylhexosamine-1/6-  
535 phosphate: 300/79 (CE, -80V); Uridine diphosphate N-acetyl hexosamine: 608/204 (DP, 80V; CE, 12V) and  
536 282/79 (DP, -280V, in-source fragmentation; CE, -72V); Neu5NAc: 310/292 (CE, 8V). Chromatogram review  
537 and peak area integration were performed using MultiQuant software version 2.1 (AB SCIEX). The peak  
538 area for each metabolite was normalized against total cell number. The normalized area values were for  
539 statistical analysis.

540 **Mouse Xenografts and Infusions.** Animal procedures were performed with the approval of the UT  
541 Southwestern IACUC. Doxycycline-inducible GFPT2 KO cells (H460, H157, and Calu-1) were suspended in  
542 RPMI, mixed with Matrigel (Becton Dickinson), and  $0.1 \times 10^6$  for H460 and  $3 \times 10^6$  cells for H157 and Calu-1

543 were implanted subcutaneously into 6-week-old NCRNU mice. After tumor cell injection, mice were  
544 randomized and then allocated into cages. Mice were fed regular chow or Doxycycline-containing chow  
545 (200mg/kg, Bio-Serv), starting 1 day after implantation. For azaserine treatment, cells (H460, A549, Calu-  
546 1, or Calu-6) were suspended in serum free RPMI, mixed 1:1 with Matrigel (Becton Dickinson), then  
547  $0.1 \times 10^6$  (H460),  $1 \times 10^6$  (Calu-6),  $2 \times 10^6$  (A549),  $3 \times 10^6$  (Calu-1) cells were subcutaneously injected into the  
548 flanks of 6-week-old NCRNU mice. After tumor cell injection, mice were randomized, allocated into cages,  
549 and intraperitoneally injected azaserine at 2.5mg/kg or PBS when the xenografted tumors measured  
550  $\sim 100 \text{mm}^3$ . Injections were performed every other day for a total of 6 or 7 doses. Tumor size was measured  
551 every other day with electronic calipers. Tumor volumes were calculated every 3 to 4 days by caliper  
552 measurements of the short (a) and long (b) tumor diameters (volume =  $a^2 \times b / 2$ ) or of tumor height (h),  
553 short (a) and long (b) tumor width (volume =  $h \times a \times b / 2$ ) depending on tumor shape. Infusions occurred  
554 when flank tumors were 0.5-1.5cm diameter. Mice were fasted the night before the infusion for about 16  
555 hours, and the next day, 25-gauge catheters were placed in the lateral tail vein under anesthesia. [ $\gamma$   
556  $^{15}\text{N}$ ]glutamine infusions started immediately after implantation of the catheter and continued for 5 hours  
557 at the rate of 5mg/kg/min with the total dose of 1.5g/kg in 750 $\mu\text{l}$  saline, also under anesthesia. The  
558 glutamine solution was administered as a bolus 150 $\mu\text{l}/\text{min}$  (1min) followed by a continuous rate of  
559 2.5ml/min for 5 hours. Blood samples (10-20 $\mu\text{l}$ ) were collected at 0.5, 1, 2 and 5 hours via retro-orbital  
560 bleed. Animals were euthanized at the end of the infusion, tumors were harvested, rinsed briefly in cold  
561 saline and frozen in liquid nitrogen. Frozen tissues were then weighed and divided into 3 fragments for  
562 technical replicates. Fragments were homogenized in 80% methanol:20% water and processed and  
563 analyzed as described above (Metabolomics).

564 **Cell growth, Cell death, and Viability.** To monitor proliferation in monolayer culture,  $1-3 \times 10^5$  cells were  
565 seeded in a 6 cm dish. Every 3 days, cells were trypsinized and counted with a hemacytometer. The live  
566 cell content was estimated using CellTiter-glo assay (CTG, Promega). To examine cell death, cells were  
567 treated as indicated in the Figure Legend and stained with propidium iodide (PI) or with Annexin V-FITC  
568 and PI. Cells were then analyzed by flow cytometry (FACS Aria II SORP).

569 **Soft-Agar Colony Formation Assay.** Four days after Dox induction, cells (2,000/well) were suspended in  
570 0.375% agar (Noble agar, Difco) pre-equilibrated with growth medium, over a 0.75% bottom agar layer in  
571 each well of a 6-well plate. There was no pre-doxycycline treatment for GFPT2 KO and WT H460 clones  
572 generated by the original CRISPR-Cas9 system. Colonies were allowed to form for 20-22 days with  
573 intermittent medium supplementation (a few drops twice a week). Images were acquired with G box-

574 Syngene (Syngene) and colonies were detected with GeneTools software (Syngene). To examine  
575 constitutive CRISPR-mediated GFPT2 KO clones in soft agar, the same procedures was used.

576 **Analysis of cell invasion.** Invasion assays were carried out by seeding  $5 \times 10^4$  cells on Corning BioCoat  
577 Matrigel Invasion Systems (354480, Corning). The Corning BioCoat control inserts were used as a cell  
578 migration control (354578, Corning). Fetal bovine serum (5%) in RPMI 1640 was used as the  
579 chemoattractant. Non-invasive cells on the upper membrane of the insert were removed with Q-tips, and  
580 invasive cells attached to the bottom membrane of the insert were stained with Hema 3™ Fixative and  
581 Solutions (Fisher Scientific) after 24-hour incubation at 37°C. Invaded cells were imaged with an Olympus  
582 IX81 microscope and quantified using ImageJ.

583 **FACS analysis.** Lectin binding was evaluated by flow cytometry as described previously<sup>45</sup>. The following  
584 reagents were used at the final concentrations indicated: allophycocyanin-streptavidin (APC-Strep) (Life  
585 Sciences, S-868), 5  $\mu\text{g}/\text{mL}$ , LEA-biotin (Vector labs B-1175, 1  $\mu\text{g}/\text{mL}$ ), L-PHA rhodamine (Vector labs RL-  
586 1112, 20  $\mu\text{g}/\text{mL}$ ). Empty vector (EV) control and LKB1 WT expressing H460 and H2122 cells, and  
587 doxycycline-inducible GFPT2 KO H460 and H157 cells were harvested by centrifugation, washed twice with  
588 DPBS, then resuspended in DPBS at  $2.0 \times 10^6$  cells/ml. Then, 200  $\mu\text{L}$  of cell suspension was transferred to  
589 V-bottom 96-well plate and pelleted by centrifugation at 600g for 5 minutes. The cell pellets were  
590 incubated with 100  $\mu\text{L}$  of lectin diluted in DPBS for 60 min at 4 °C (LEA incubation was 30 min), then  
591 washed with DPBS three times. When a secondary detection reagent was used, cells were incubated with  
592 5  $\mu\text{g}/\text{mL}$  APC-Strep in DPBS for 45 min at 4 °C. Fluorescence was analyzed by flow cytometry on a FACS  
593 Aria II SORP with dual lasers at 488 nm and 635 nm. Plots show the mean fluorescence intensity (MFI),  
594 typically for 10,000 cells.

595 **RNAi.** Transient gene-silencing experiments were performed with endoribonuclease-prepared siRNAs  
596 (esiRNA, Sigma) for GFPT1 and GFPT2, and with ON-TARGETplus-SMART pools (Dharmacon) for LKB1 and  
597 OGT. Viability assays were performed after 96hr and cell death analyses and all other western blots were  
598 performed after 48hr.

599 **Western Blot Analysis.** Protein lysates were prepared in either RIPA or CHAPS buffer and quantified using  
600 the BCA Protein Assay (Thermo Scientific). Protein was separated on 4%–20% SDS-PAGE gels, transferred  
601 to PVDF membranes, and probed with antibodies against O-GlcNAcylation (Santa Cruz, sc-59623),  $\beta$ -actin  
602 (Abcam, ab8227), cyclophilin B (clone EPR12703(B), ab178397), CPS1 (ab3682), GFPT1 (ab125069), GFPT2

603 (ab190966), phospho-ACC (Cell Signaling, #11818), LKB1 (Cell Signaling, #3050), and OGT (Sigma, O6264-  
604 200UL).

605 **Immunohistochemistry.** Paraffin-embedded sections from mouse lung tumors were deparaffinized with  
606 xylene followed by ethanol rehydration, fixed in 4% paraformaldehyde, and antigen-retrieved with 10 mM  
607 sodium citrate pH 6.0. Sections were then subjected to endogenous peroxidase blocking with 0.3% H<sub>2</sub>O<sub>2</sub>.  
608 Bovine serum albumin (BSA, 3%) in 0.1% PBST was used as the blocking agent and antibody dilution  
609 solution. After 1hr blocking, samples were incubated overnight at 4°C with the primary antibody (Galectin-  
610 3, ab2785), washed, incubated for 30 minutes with diluted biotinylated secondary antibodies (Vector lab,  
611 PK-4000). After washing, sections were incubated for 30 minutes with VECTASTAIN® ABC Reagent, washed  
612 for 5 minutes in buffer, incubated in peroxidase substrate solution until desired stain intensity developed.  
613 Images were acquired with an Olympus IX81 microscope.

614 **Patient Survival Data.** Differences in survival based on either *GFPT1* or *GFPT2* mRNA expression was  
615 determined in lung adenocarcinoma tumors from The Cancer Genome Atlas (TCGA)<sup>46</sup> and data from KM  
616 Plotter (<http://kmplot.com/analysis/index.php?p=service&cancer=lung>)<sup>47</sup>. Methods for data generation,  
617 normalization, and bioinformatics analyses were previously described in the publication. For the present  
618 analysis, data from this cohort was analyzed using Lung Cancer Explorer (<http://lce.biohpc.swmed.edu>).

619 **Statistical Analysis.** No statistical methods were used to predetermine sample size. Metabolomics and  
620 flux analysis samples were randomized prior to LC-MS/MS analysis. For xenograft experiments, mice  
621 injected with tumor cells were randomized prior to being allocated to cages. All other experiments were  
622 not randomized, and the investigators were not blinded to allocation during experiments or to outcome  
623 assessment. Experiments in Figs 1a, 1c, 1d, 2b, 2c, 6b, 6c, 6e-f, Supplementary Data Figs 1c, 3a, 5e, 6b,  
624 7m, 8d were performed once. Experiments in Figs 2e, 3b, 3c, 4c, 4e, 5a-i, 6a, 6d, Supplementary Data Figs.  
625 3b, 3c, 6a, 6c, 7a, 7b, 7g, 7j, 7l, 7n, 8a-c, 8e, 8f were performed twice. All other experiments were  
626 performed three times or more. Variation for xenograft tumor volume is indicated using standard error  
627 of the mean, and variation in all other experiments is indicated using standard deviation. To assess the  
628 significance of differences between two conditions, a two-tailed Welch's unequal variances t-test was  
629 used. Where the data points showed skewed distribution (e.g. Supplementary Data Fig. 1c), Wilcoxon  
630 signed rank test was performed. For comparisons among three or more groups, a one-way ANOVA  
631 followed by Tukey's multiple comparisons test was performed. To assay significance of differences  
632 between K and KL cells on azaserine treatment, R package drc was used to fit a four-parameter log-logistic  
633 model for data from each cell line. Area under the fitted curve was calculated for each cell line. Mann-



634 Whitney U test was used to calculate p-value from comparing AUC values from KL cell lines and K cell lines.  
635 To examine significance in xenograft tumor growth between two or among three or more groups, two-  
636 way ANOVA followed by Tukey's multiple comparisons test was performed. Before applying ANOVA, we  
637 first tested whether there was homogeneity of variation among the groups (as required for ANOVA) using  
638 the Brown–Forsythe test. In all xenograft assays, we injected 6-7 week old NCRNU mice (both male and  
639 female) 10 mice per treatment, as we expected based on previous pilot experiments to observe  
640 differences in tumor size after 2 weeks.

641

- 642 1 Ji, H. *et al.* LKB1 modulates lung cancer differentiation and metastasis. *Nature* **448**, 807-810,  
643 doi:10.1038/nature06030 (2007).
- 644 2 Calles, A. *et al.* Immunohistochemical Loss of LKB1 Is a Biomarker for More Aggressive Biology in  
645 KRAS-Mutant Lung Adenocarcinoma. *Clinical cancer research : an official journal of the American*  
646 *Association for Cancer Research* **21**, 2851-2860, doi:10.1158/1078-0432.Ccr-14-3112 (2015).
- 647 3 Skoulidis, F. & Heymach, J. V. Co-occurring genomic alterations in non-small-cell lung cancer  
648 biology and therapy. *Nature reviews. Cancer* **19**, 495-509, doi:10.1038/s41568-019-0179-8  
649 (2019).
- 650 4 Skoulidis, F. *et al.* STK11/LKB1 Mutations and PD-1 Inhibitor Resistance in KRAS-Mutant Lung  
651 Adenocarcinoma. *Cancer discovery* **8**, 822-835, doi:10.1158/2159-8290.Cd-18-0099 (2018).
- 652 5 Racker, E., Resnick, R. J. & Feldman, R. Glycolysis and methylaminoisobutyrate uptake in rat-1  
653 cells transfected with ras or myc oncogenes. *Proceedings of the National Academy of Sciences of*  
654 *the United States of America* **82**, 3535-3538, doi:10.1073/pnas.82.11.3535 (1985).
- 655 6 Ying, H. *et al.* Oncogenic Kras maintains pancreatic tumors through regulation of anabolic  
656 glucose metabolism. *Cell* **149**, 656-670, doi:10.1016/j.cell.2012.01.058 (2012).
- 657 7 Bryant, K. L., Mancias, J. D., Kimmelman, A. C. & Der, C. J. KRAS: feeding pancreatic cancer  
658 proliferation. *Trends in biochemical sciences* **39**, 91-100, doi:10.1016/j.tibs.2013.12.004 (2014).
- 659 8 Padanad, M. S. *et al.* Fatty Acid Oxidation Mediated by Acyl-CoA Synthetase Long Chain 3 Is  
660 Required for Mutant KRAS Lung Tumorigenesis. *Cell reports* **16**, 1614-1628,  
661 doi:10.1016/j.celrep.2016.07.009 (2016).
- 662 9 Hardie, D. G., Ross, F. A. & Hawley, S. A. AMPK: a nutrient and energy sensor that maintains  
663 energy homeostasis. *Nat Rev Mol Cell Biol* **13**, 251-262, doi:10.1038/nrm3311 (2012).
- 664 10 Shackelford, D. B. & Shaw, R. J. The LKB1-AMPK pathway: metabolism and growth control in  
665 tumour suppression. *Nature reviews. Cancer* **9**, 563-575, doi:10.1038/nrc2676 (2009).
- 666 11 Shackelford, D. B. *et al.* LKB1 inactivation dictates therapeutic response of non-small cell lung  
667 cancer to the metabolism drug phenformin. *Cancer cell* **23**, 143-158,  
668 doi:10.1016/j.ccr.2012.12.008 (2013).
- 669 12 Liu, Y. *et al.* Metabolic and functional genomic studies identify deoxythymidylate kinase as a  
670 target in LKB1-mutant lung cancer. *Cancer discovery* **3**, 870-879, doi:10.1158/2159-8290.Cd-13-  
671 0015 (2013).
- 672 13 Kim, H. S. *et al.* Systematic identification of molecular subtype-selective vulnerabilities in non-  
673 small-cell lung cancer. *Cell* **155**, 552-566, doi:10.1016/j.cell.2013.09.041 (2013).
- 674 14 Kim, J. *et al.* CPS1 maintains pyrimidine pools and DNA synthesis in KRAS/LKB1-mutant lung  
675 cancer cells. *Nature* **546**, 168-172, doi:10.1038/nature22359 (2017).



- 676 15 Hanover, J. A., Krause, M. W. & Love, D. C. The hexosamine signaling pathway: O-GlcNAc cycling  
677 in feast or famine. *Biochimica et biophysica acta* **1800**, 80-95, doi:10.1016/j.bbagen.2009.07.017  
678 (2010).
- 679 16 Hawkins, M., Angelov, I., Liu, R., Barzilai, N. & Rossetti, L. The tissue concentration of UDP-N-  
680 acetylglucosamine modulates the stimulatory effect of insulin on skeletal muscle glucose  
681 uptake. *The Journal of biological chemistry* **272**, 4889-4895, doi:10.1074/jbc.272.8.4889 (1997).
- 682 17 Denzel, M. S. *et al.* Hexosamine pathway metabolites enhance protein quality control and  
683 prolong life. *Cell* **156**, 1167-1178, doi:10.1016/j.cell.2014.01.061 (2014).
- 684 18 Olson, A. K., Bouchard, B., Zhu, W. Z., Chatham, J. C. & Des Rosiers, C. First characterization of  
685 glucose flux through the hexosamine biosynthesis pathway (HBP) in ex vivo mouse heart. *The*  
686 *Journal of biological chemistry*, doi:10.1074/jbc.RA119.010565 (2020).
- 687 19 Hardiville, S. & Hart, G. W. Nutrient regulation of signaling, transcription, and cell physiology by  
688 O-GlcNAcylation. *Cell metabolism* **20**, 208-213, doi:10.1016/j.cmet.2014.07.014 (2014).
- 689 20 Dennis, J. W., Nabi, I. R. & Demetriou, M. Metabolism, cell surface organization, and disease. *Cell*  
690 **139**, 1229-1241, doi:10.1016/j.cell.2009.12.008 (2009).
- 691 21 Kornfeld, R. & Kornfeld, S. Assembly of asparagine-linked oligosaccharides. *Annual review of*  
692 *biochemistry* **54**, 631-664, doi:10.1146/annurev.bi.54.070185.003215 (1985).
- 693 22 Lau, K. S. *et al.* Complex N-glycan number and degree of branching cooperate to regulate cell  
694 proliferation and differentiation. *Cell* **129**, 123-134, doi:10.1016/j.cell.2007.01.049 (2007).
- 695 23 Peixoto, A., Relvas-Santos, M., Azevedo, R., Santos, L. L. & Ferreira, J. A. Protein Glycosylation  
696 and Tumor Microenvironment Alterations Driving Cancer Hallmarks. *Front Oncol* **9**, 380,  
697 doi:10.3389/fonc.2019.00380 (2019).
- 698 24 Oki, T., Yamazaki, K., Kuromitsu, J., Okada, M. & Tanaka, I. cDNA cloning and mapping of a novel  
699 subtype of glutamine:fructose-6-phosphate amidotransferase (GFAT2) in human and mouse.  
700 *Genomics* **57**, 227-234, doi:10.1006/geno.1999.5785 (1999).
- 701 25 Wan, L. *et al.* ENL links histone acetylation to oncogenic gene expression in acute myeloid  
702 leukaemia. *Nature* **543**, 265-269, doi:10.1038/nature21687 (2017).
- 703 26 Cong, L. *et al.* Multiplex genome engineering using CRISPR/Cas systems. *Science (New York, N.Y.)*  
704 **339**, 819-823, doi:10.1126/science.1231143 (2013).
- 705 27 Huang, F. *et al.* Inosine Monophosphate Dehydrogenase Dependence in a Subset of Small Cell  
706 Lung Cancers. *Cell metabolism* **28**, 369-382.e365, doi:10.1016/j.cmet.2018.06.005 (2018).
- 707 28 Mollaoglu, G. *et al.* MYC Drives Progression of Small Cell Lung Cancer to a Variant  
708 Neuroendocrine Subtype with Vulnerability to Aurora Kinase Inhibition. *Cancer cell* **31**, 270-285,  
709 doi:10.1016/j.ccell.2016.12.005 (2017).
- 710 29 Bolscher, J. G. *et al.* Ras (proto)oncogene induces N-linked carbohydrate modification: temporal  
711 relationship with induction of invasive potential. *The EMBO journal* **7**, 3361-3368 (1988).
- 712 30 Wojciechowicz, D. C., Park, P. Y. & Paty, P. B. Beta 1-6 branching of N-linked carbohydrate is  
713 associated with K-ras mutation in human colon carcinoma cell lines. *Biochemical and biophysical*  
714 *research communications* **212**, 758-766, doi:10.1006/bbrc.1995.2034 (1995).
- 715 31 Yang, C. *et al.* High expression of GFAT1 predicts poor prognosis in patients with pancreatic  
716 cancer. *Sci Rep* **6**, 39044, doi:10.1038/srep39044 (2016).
- 717 32 Taparra, K. *et al.* O-GlcNAcylation is required for mutant KRAS-induced lung tumorigenesis. *The*  
718 *Journal of clinical investigation* **128**, 4924-4937, doi:10.1172/jci94844 (2018).
- 719 33 Prat, A. *et al.* Phenotypic and molecular characterization of the claudin-low intrinsic subtype of  
720 breast cancer. *Breast Cancer Res* **12**, R68, doi:10.1186/bcr2635 (2010).
- 721 34 Zibrova, D. *et al.* GFAT1 phosphorylation by AMPK promotes VEGF-induced angiogenesis. *The*  
722 *Biochemical journal* **474**, 983-1001, doi:10.1042/bcj20160980 (2017).

- 723 35 Hershfield, M. S. & Seegmiller, J. E. Regulation of de novo purine biosynthesis in human  
724 lymphoblasts. Coordinate control of proximal (rate-determining) steps and the inosinic acid  
725 branch point. *The Journal of biological chemistry* **251**, 7348-7354 (1976).
- 726 36 Longnecker, D. S. & Curphey, T. J. Adenocarcinoma of the pancreas in azaserine-treated rats.  
727 *Cancer research* **35**, 2249-2258 (1975).
- 728 37 Ricciardiello, F. *et al.* Inhibition of the Hexosamine Biosynthetic Pathway by targeting PGM3  
729 causes breast cancer growth arrest and apoptosis. *Cell death & disease* **9**, 377,  
730 doi:10.1038/s41419-018-0405-4 (2018).
- 731 38 Olivier-Van Stichelen, S. *et al.* The hexosamine biosynthetic pathway and O-GlcNAcylation drive  
732 the expression of beta-catenin and cell proliferation. *Am J Physiol Endocrinol Metab* **302**, E417-  
733 424, doi:10.1152/ajpendo.00390.2011 (2012).
- 734 39 Slawson, C., Copeland, R. J. & Hart, G. W. O-GlcNAc signaling: a metabolic link between diabetes  
735 and cancer? *Trends in biochemical sciences* **35**, 547-555, doi:10.1016/j.tibs.2010.04.005 (2010).
- 736 40 Hauselmann, I. & Borsig, L. Altered tumor-cell glycosylation promotes metastasis. *Front Oncol* **4**,  
737 28, doi:10.3389/fonc.2014.00028 (2014).
- 738 41 Taniguchi, N. & Kizuka, Y. Glycans and cancer: role of N-glycans in cancer biomarker, progression  
739 and metastasis, and therapeutics. *Advances in cancer research* **126**, 11-51,  
740 doi:10.1016/bs.acr.2014.11.001 (2015).
- 741 42 Subramanian, A. *et al.* Gene set enrichment analysis: a knowledge-based approach for  
742 interpreting genome-wide expression profiles. *Proceedings of the National Academy of Sciences*  
743 *of the United States of America* **102**, 15545-15550, doi:10.1073/pnas.0506580102 (2005).
- 744 43 Ran, F. A. *et al.* Genome engineering using the CRISPR-Cas9 system. *Nat Protoc* **8**, 2281-2308,  
745 doi:10.1038/nprot.2013.143 (2013).
- 746 44 Mullen, A. R. *et al.* Oxidation of alpha-ketoglutarate is required for reductive carboxylation in  
747 cancer cells with mitochondrial defects. *Cell Rep* **7**, 1679-1690, doi:10.1016/j.celrep.2014.04.037  
748 (2014).
- 749 45 Pham, N. D. *et al.* Effects of altered sialic acid biosynthesis on N-linked glycan branching and cell  
750 surface interactions. *The Journal of biological chemistry* **292**, 9637-9651,  
751 doi:10.1074/jbc.M116.764597 (2017).
- 752 46 Comprehensive molecular profiling of lung adenocarcinoma. *Nature* **511**, 543-550,  
753 doi:10.1038/nature13385 (2014).
- 754 47 Gyorfyy, B., Surowiak, P., Budczies, J. & Lanczky, A. Online survival analysis software to assess  
755 the prognostic value of biomarkers using transcriptomic data in non-small-cell lung cancer. *PLoS*  
756 *one* **8**, e82241, doi:10.1371/journal.pone.0082241 (2013).

757



# Figure 1

**a**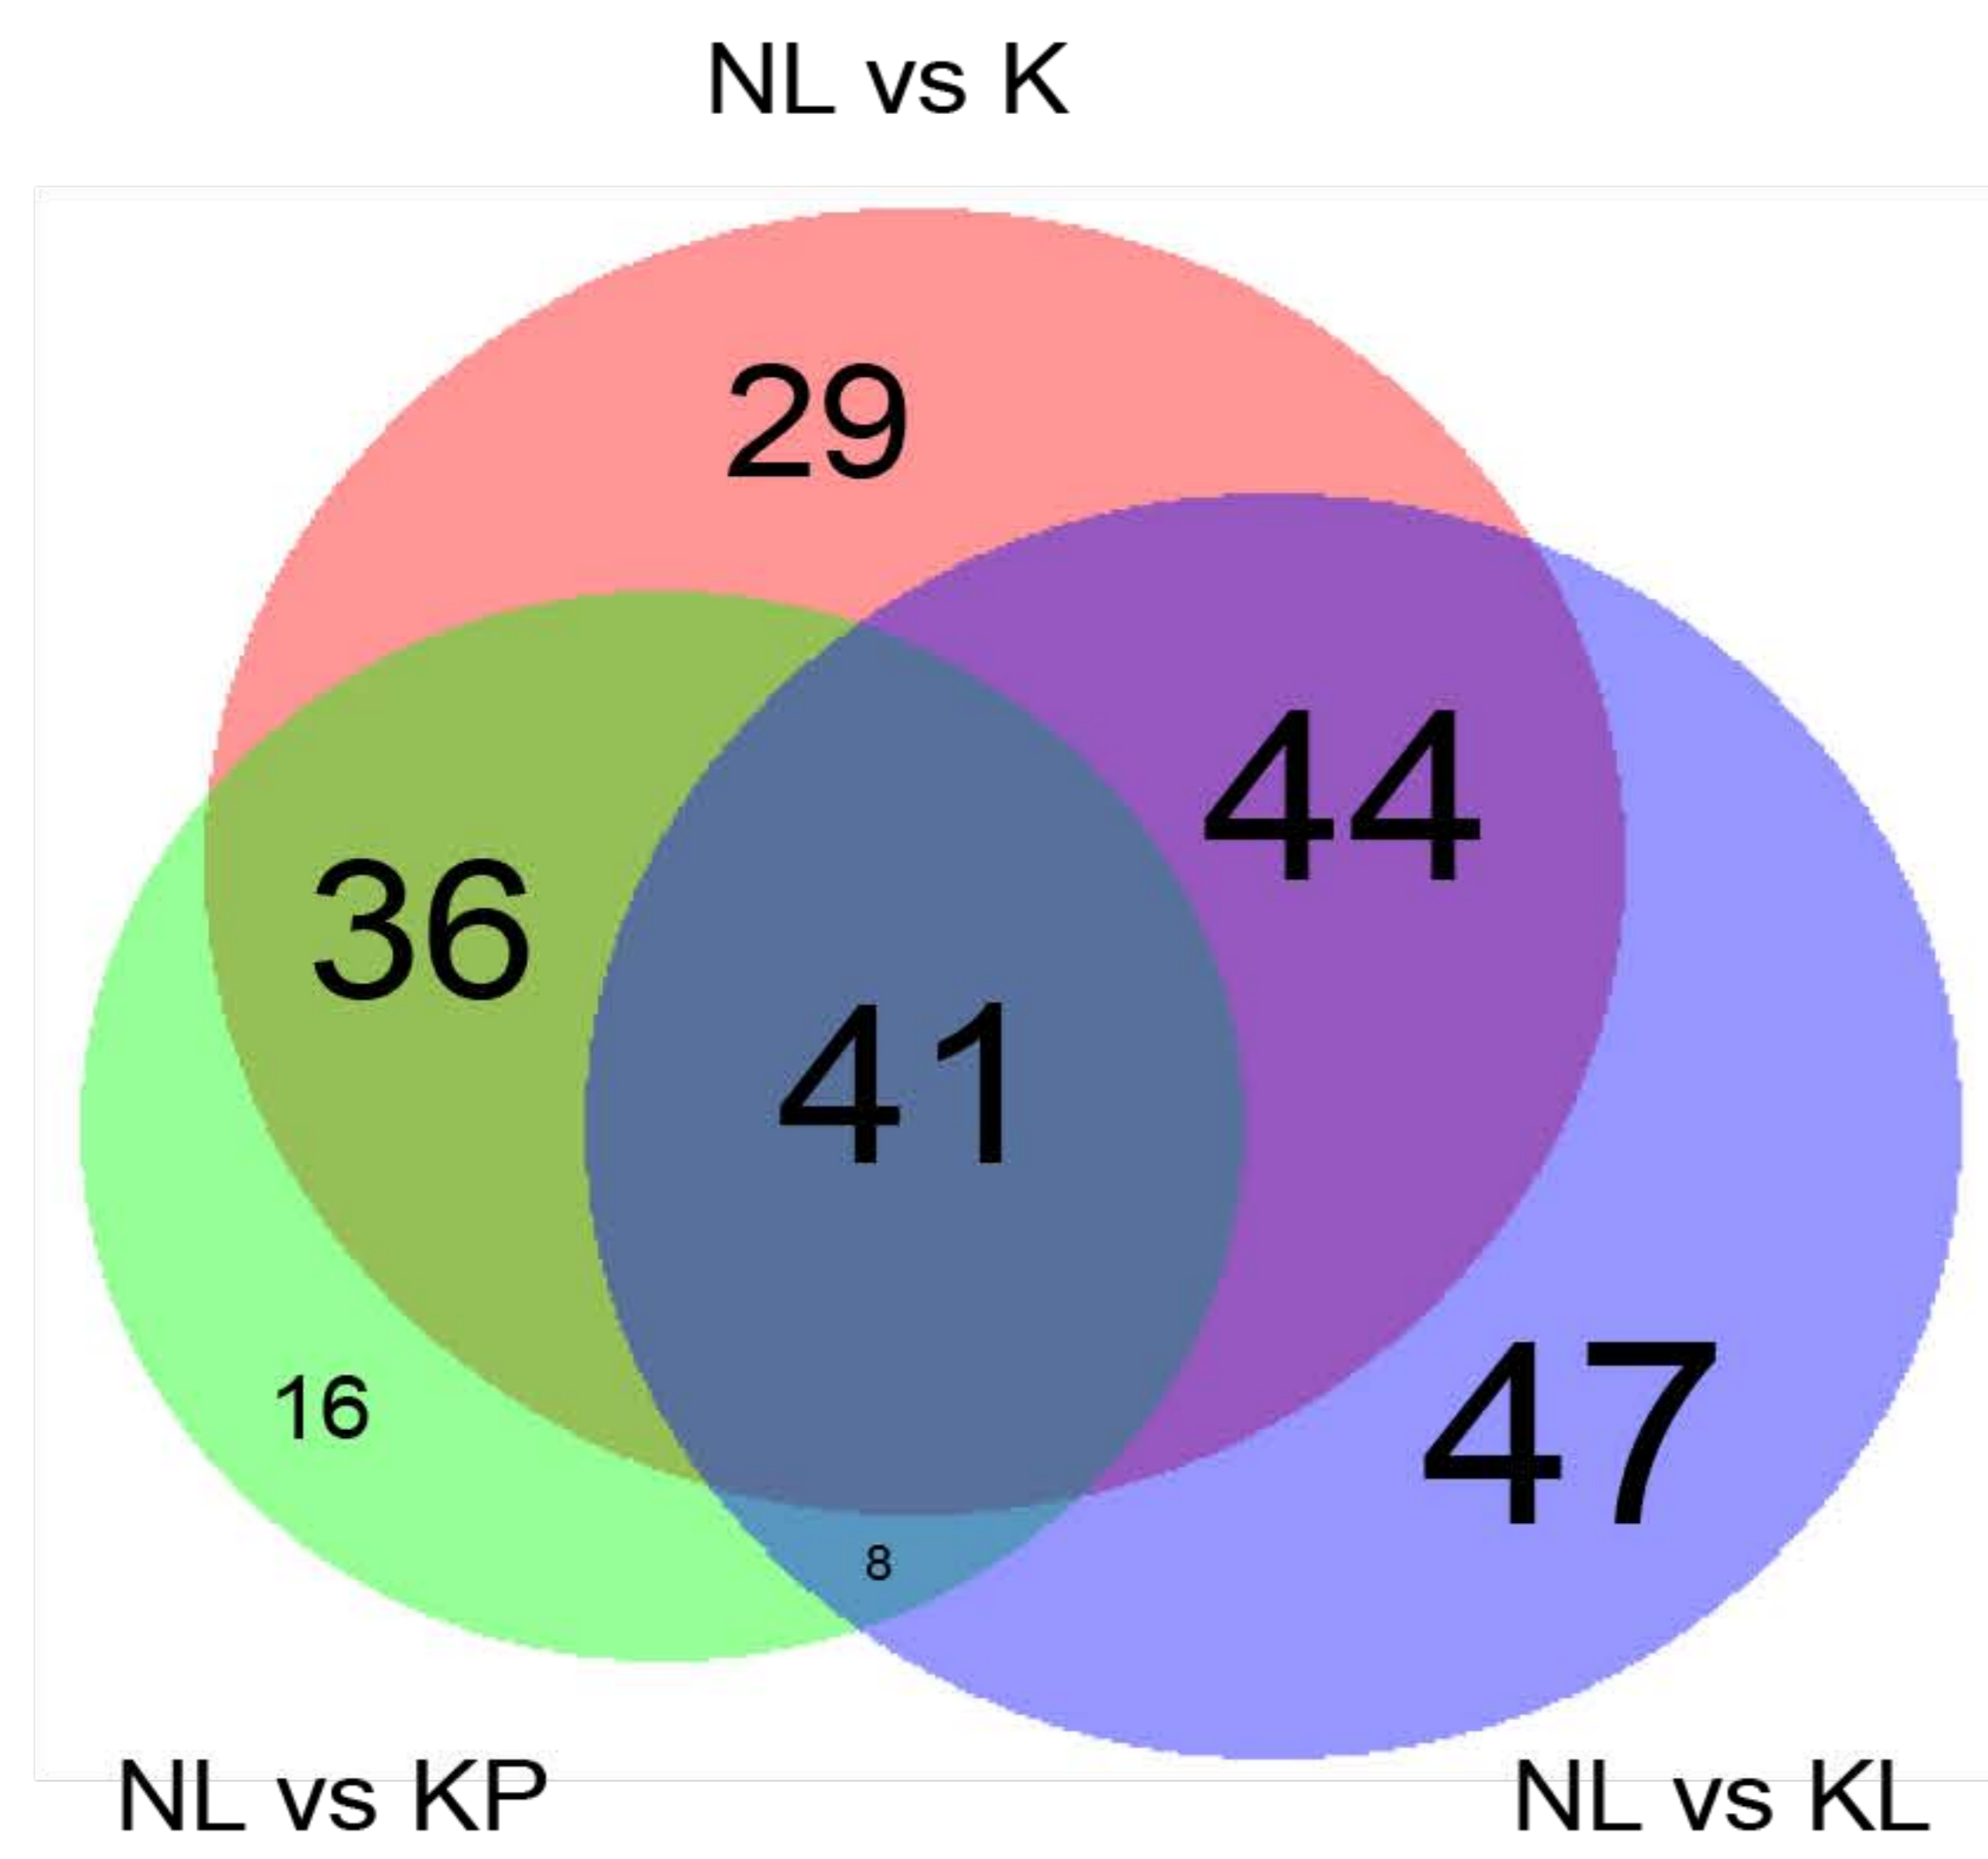**b**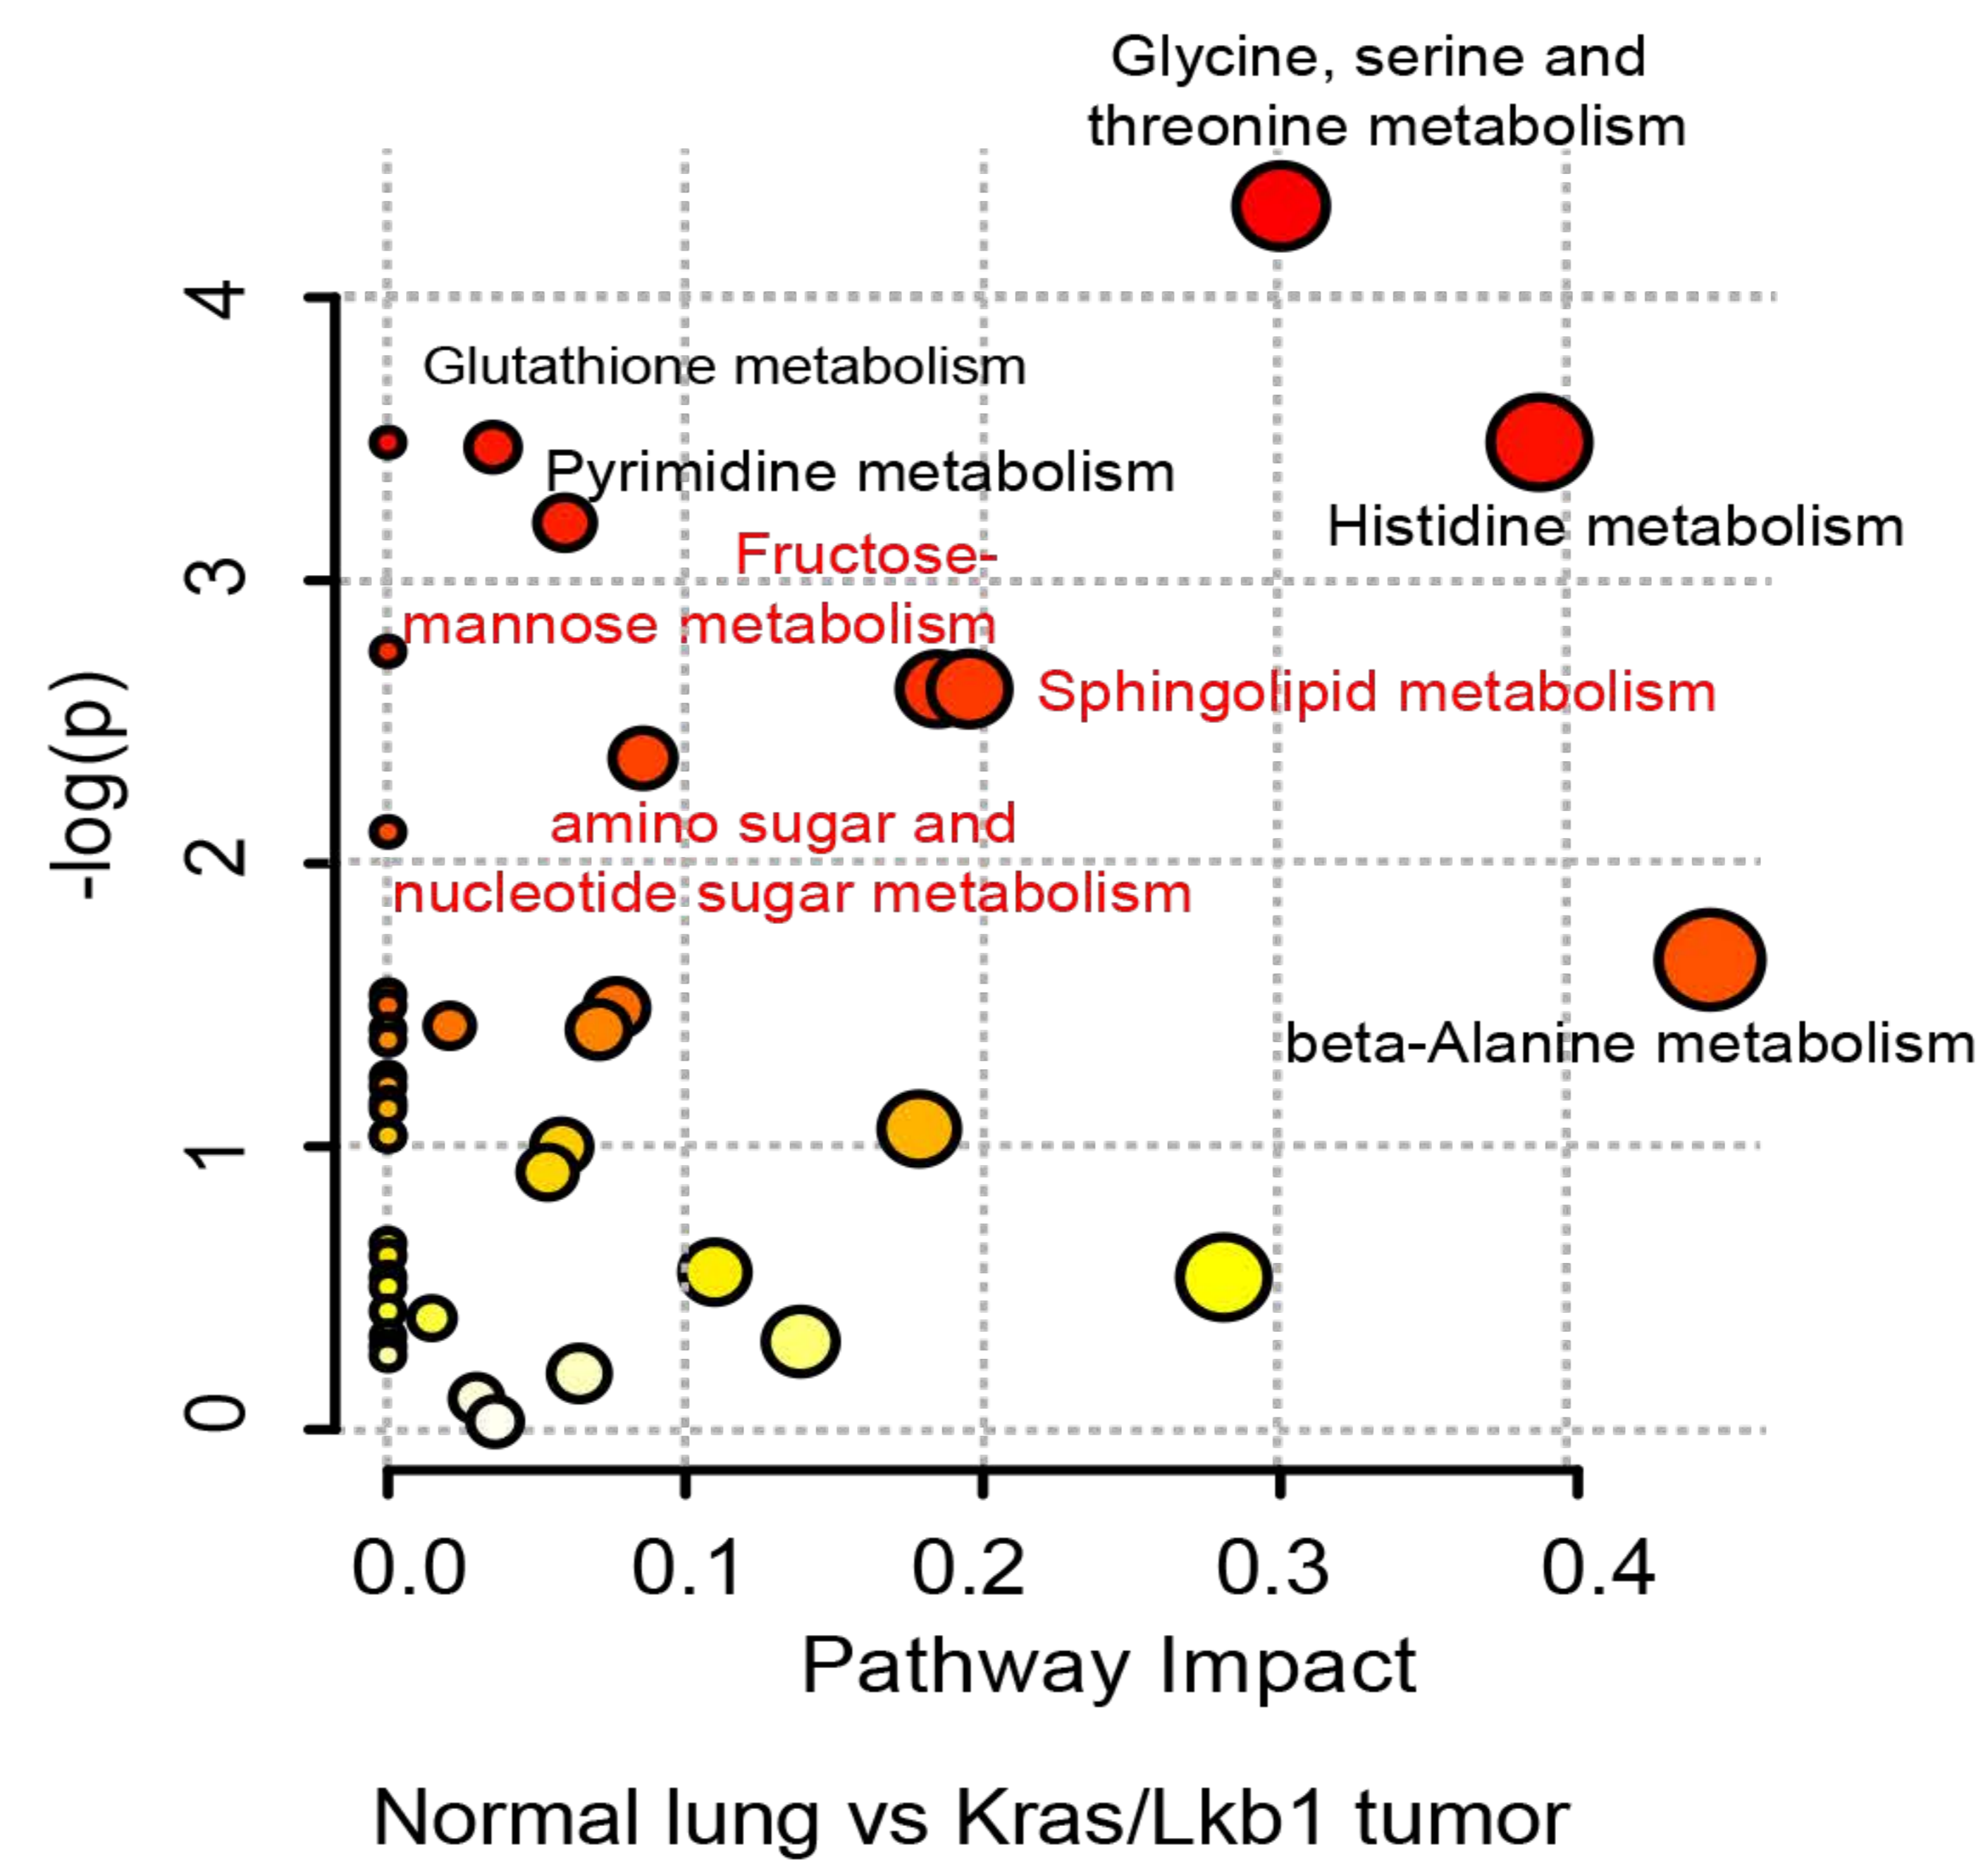**c**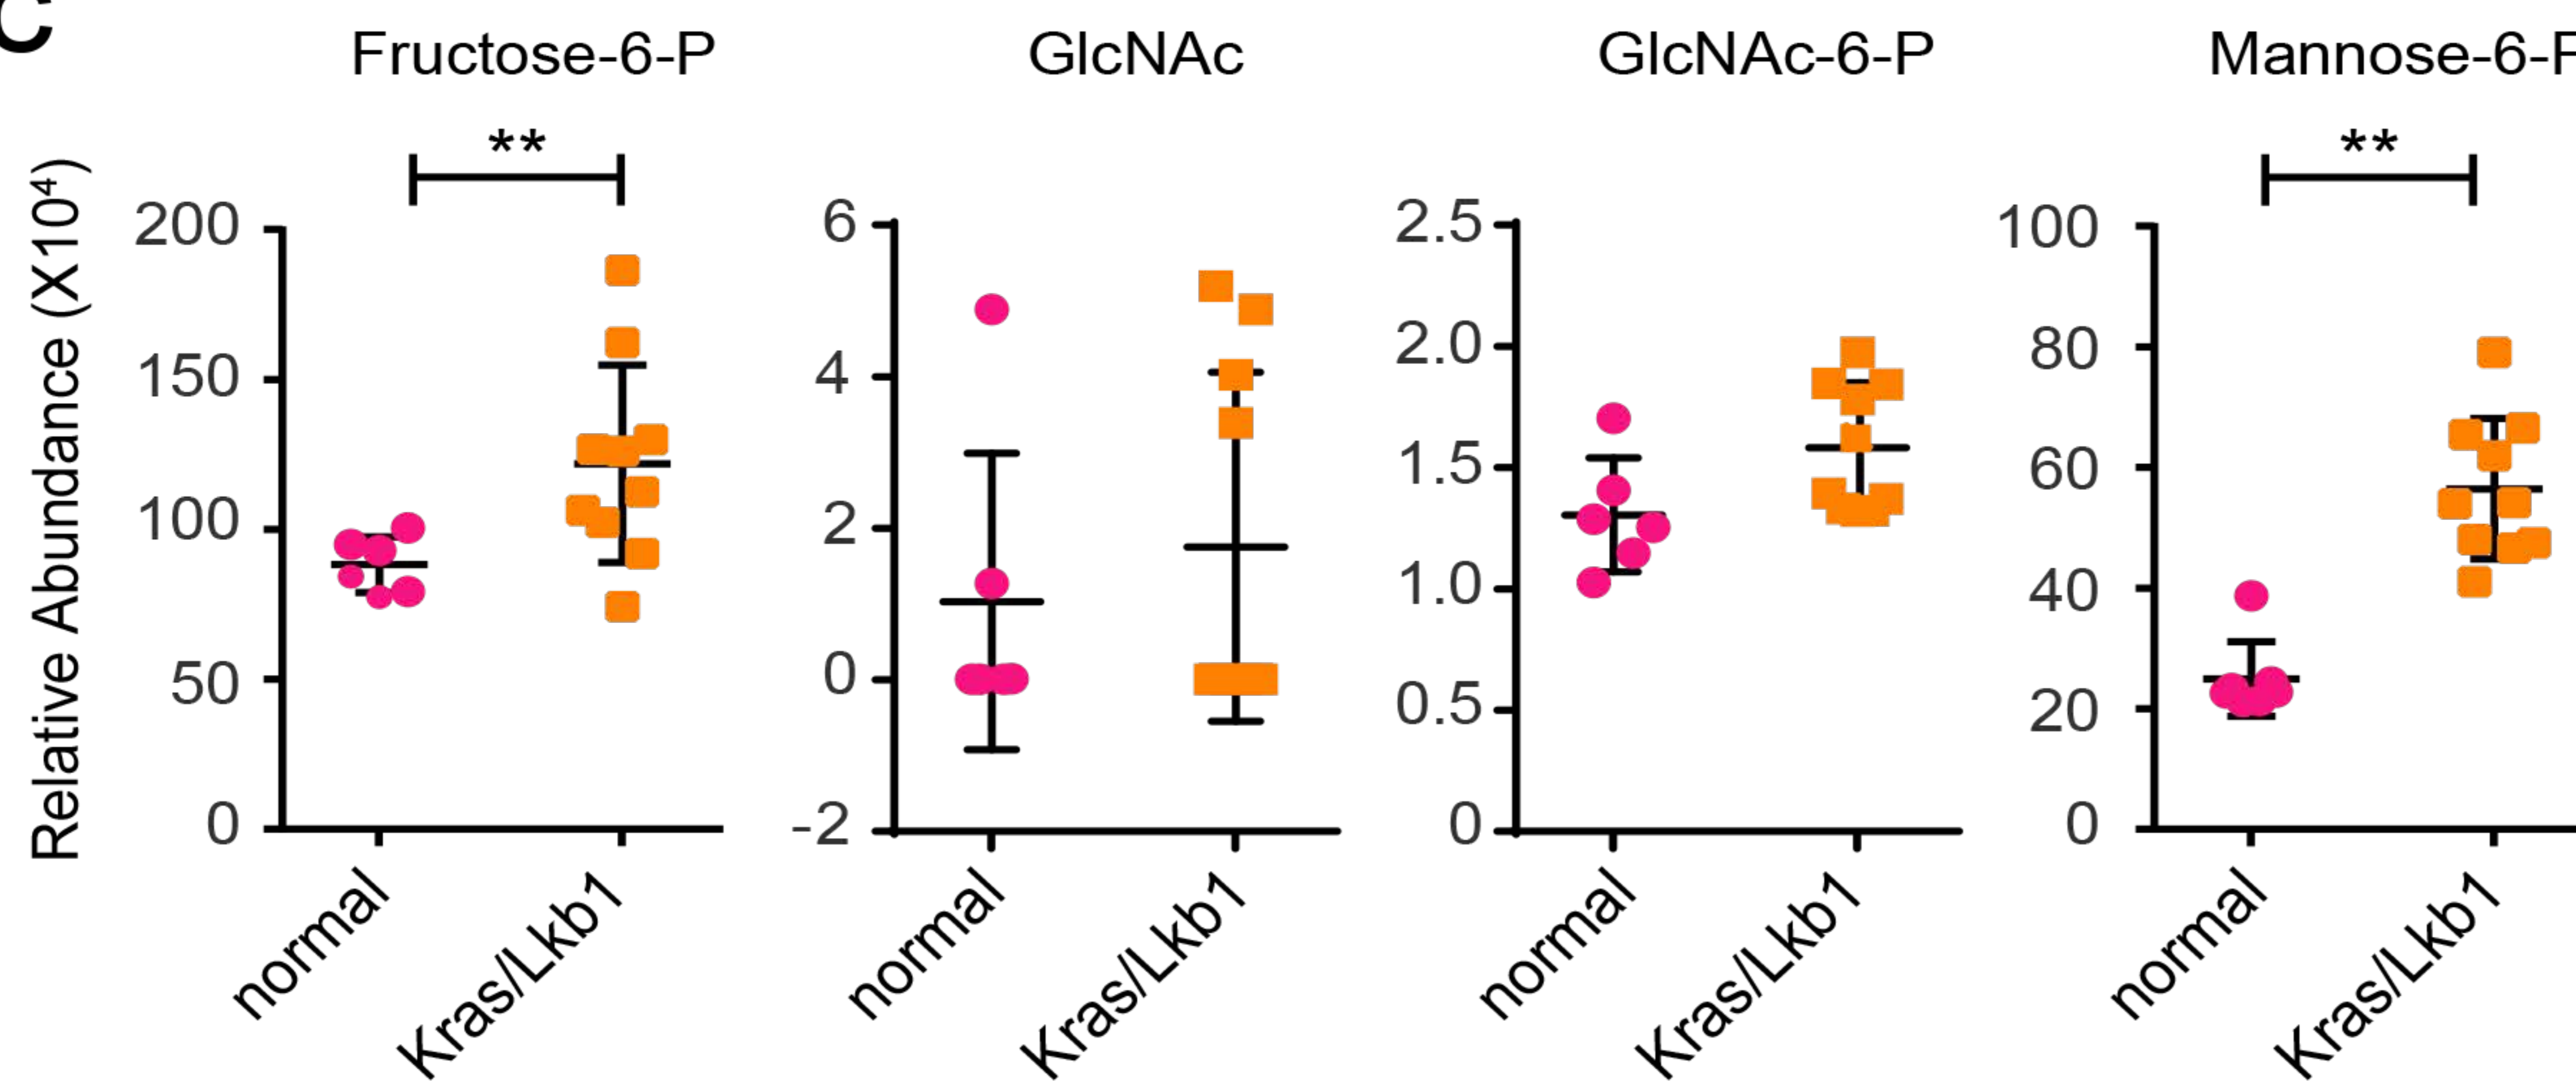**d**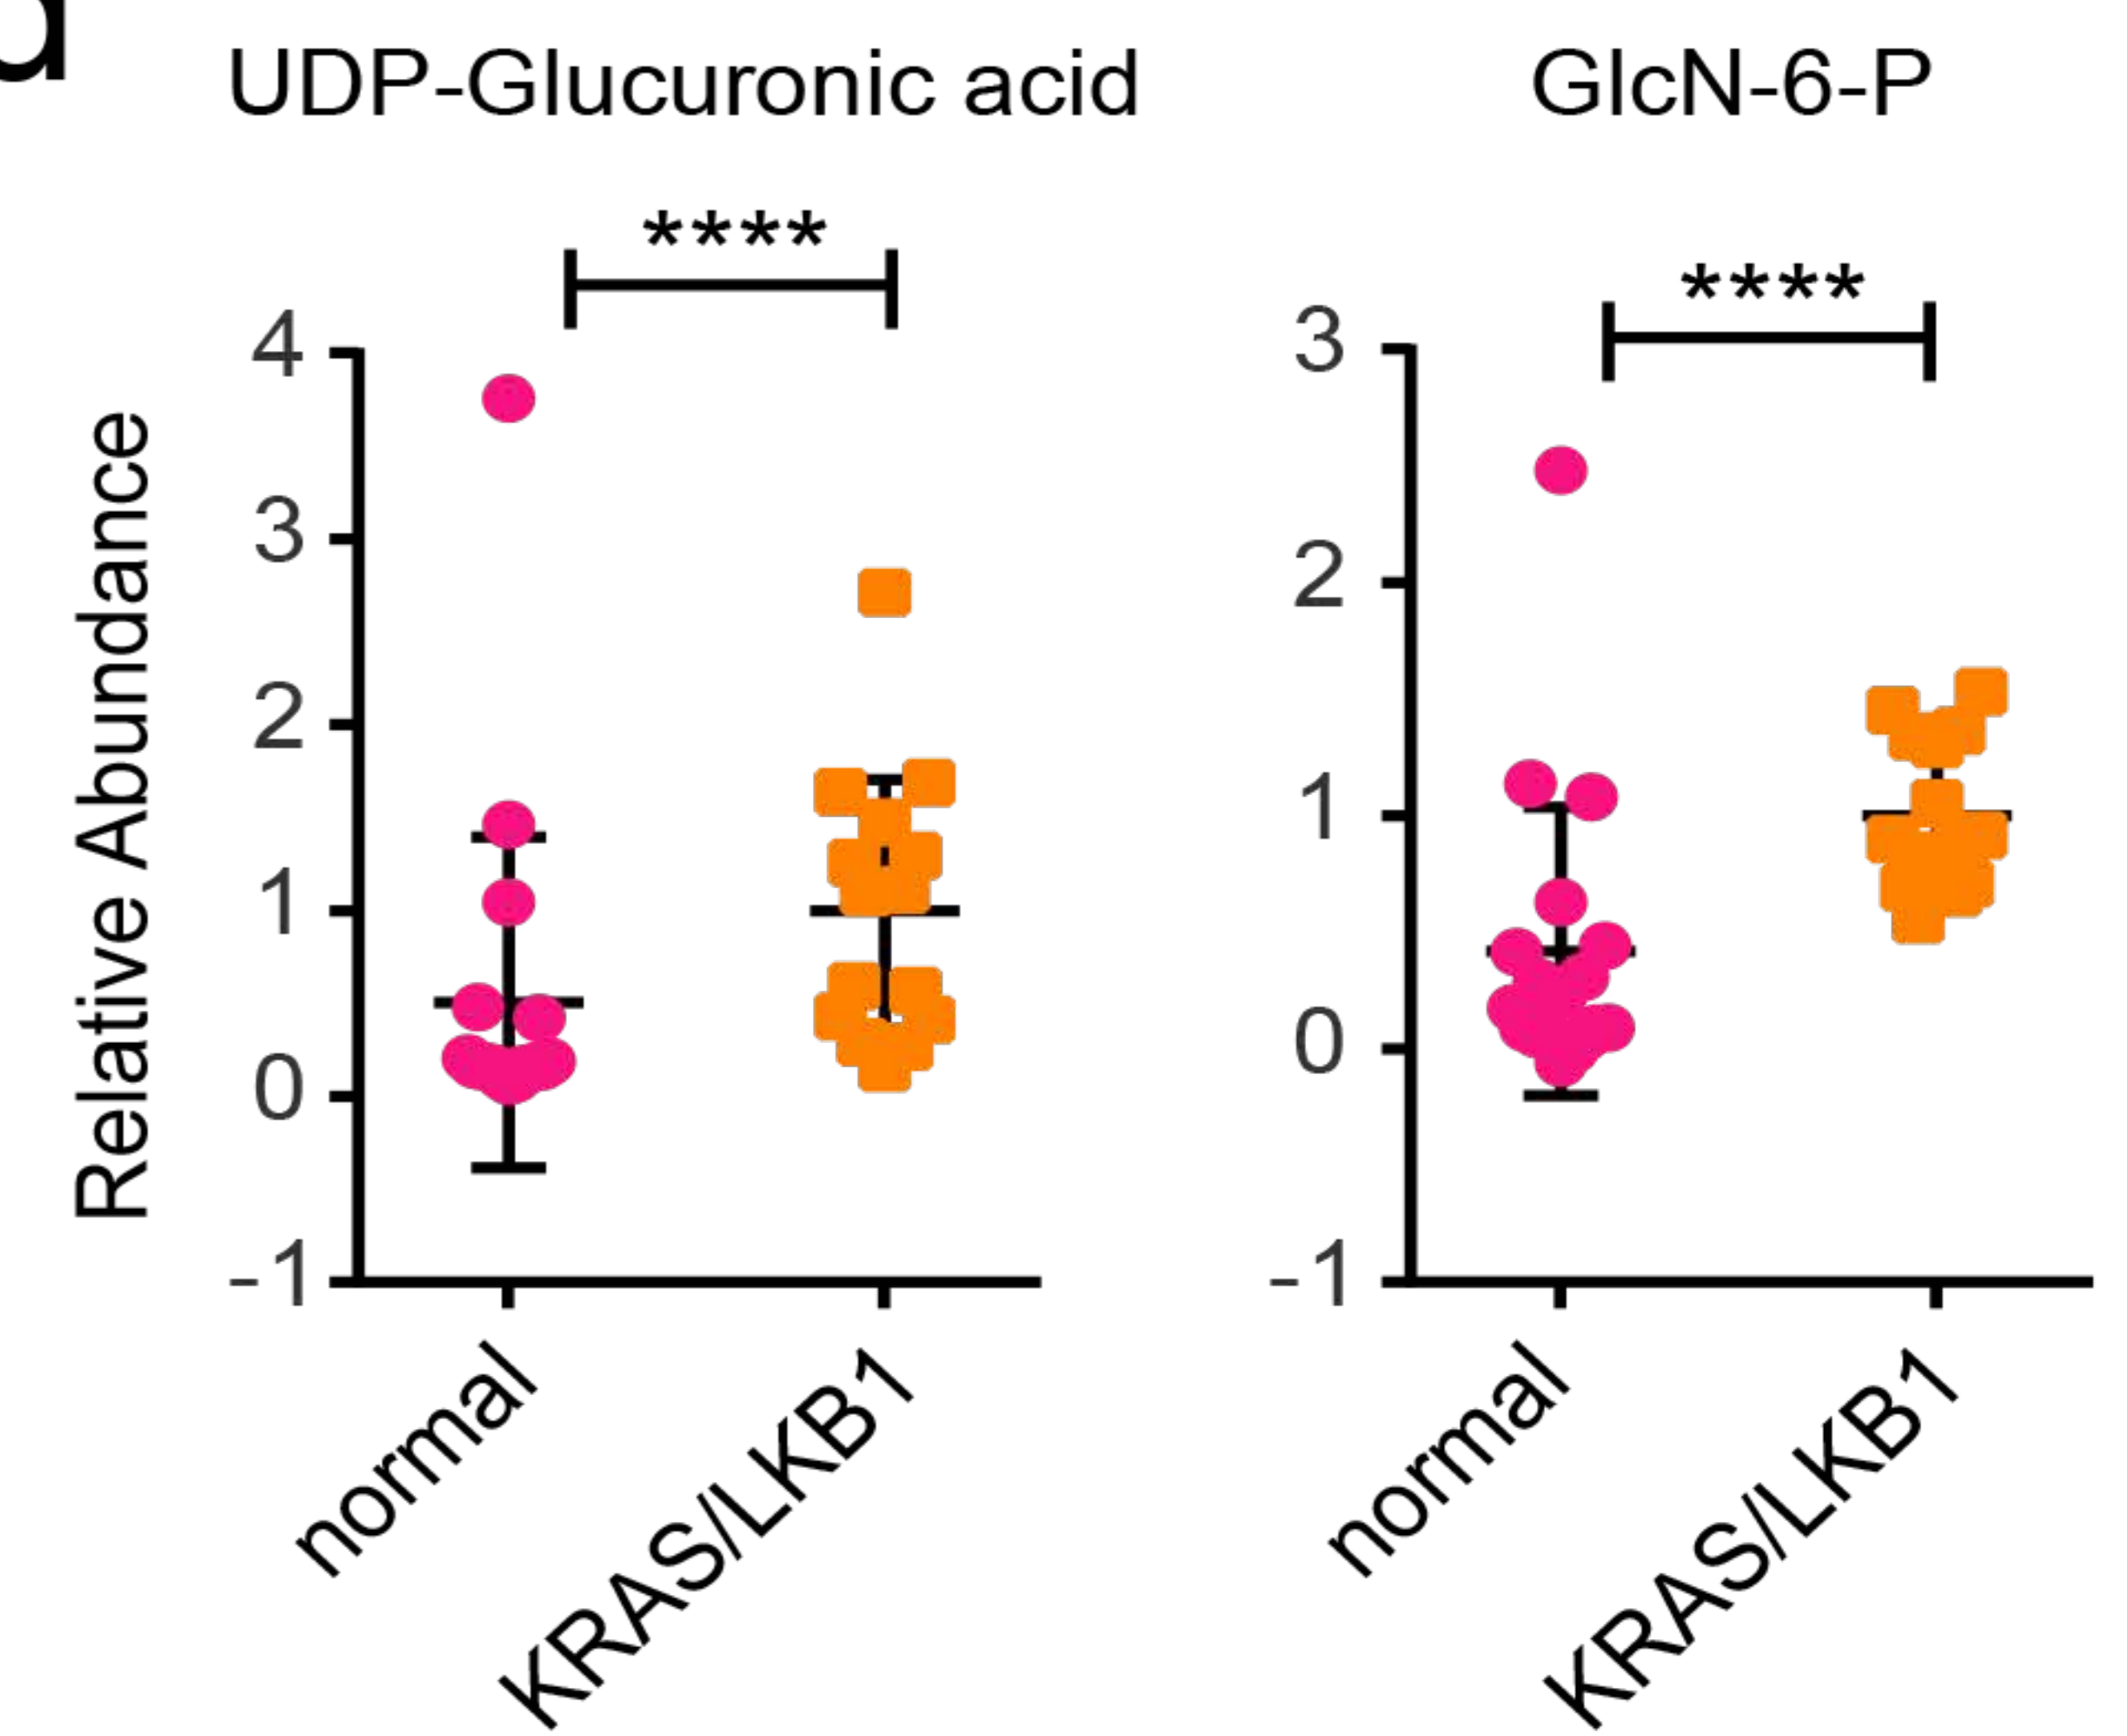**e**

KEGG\_Aminosugar and nucleotide sugar metabolism

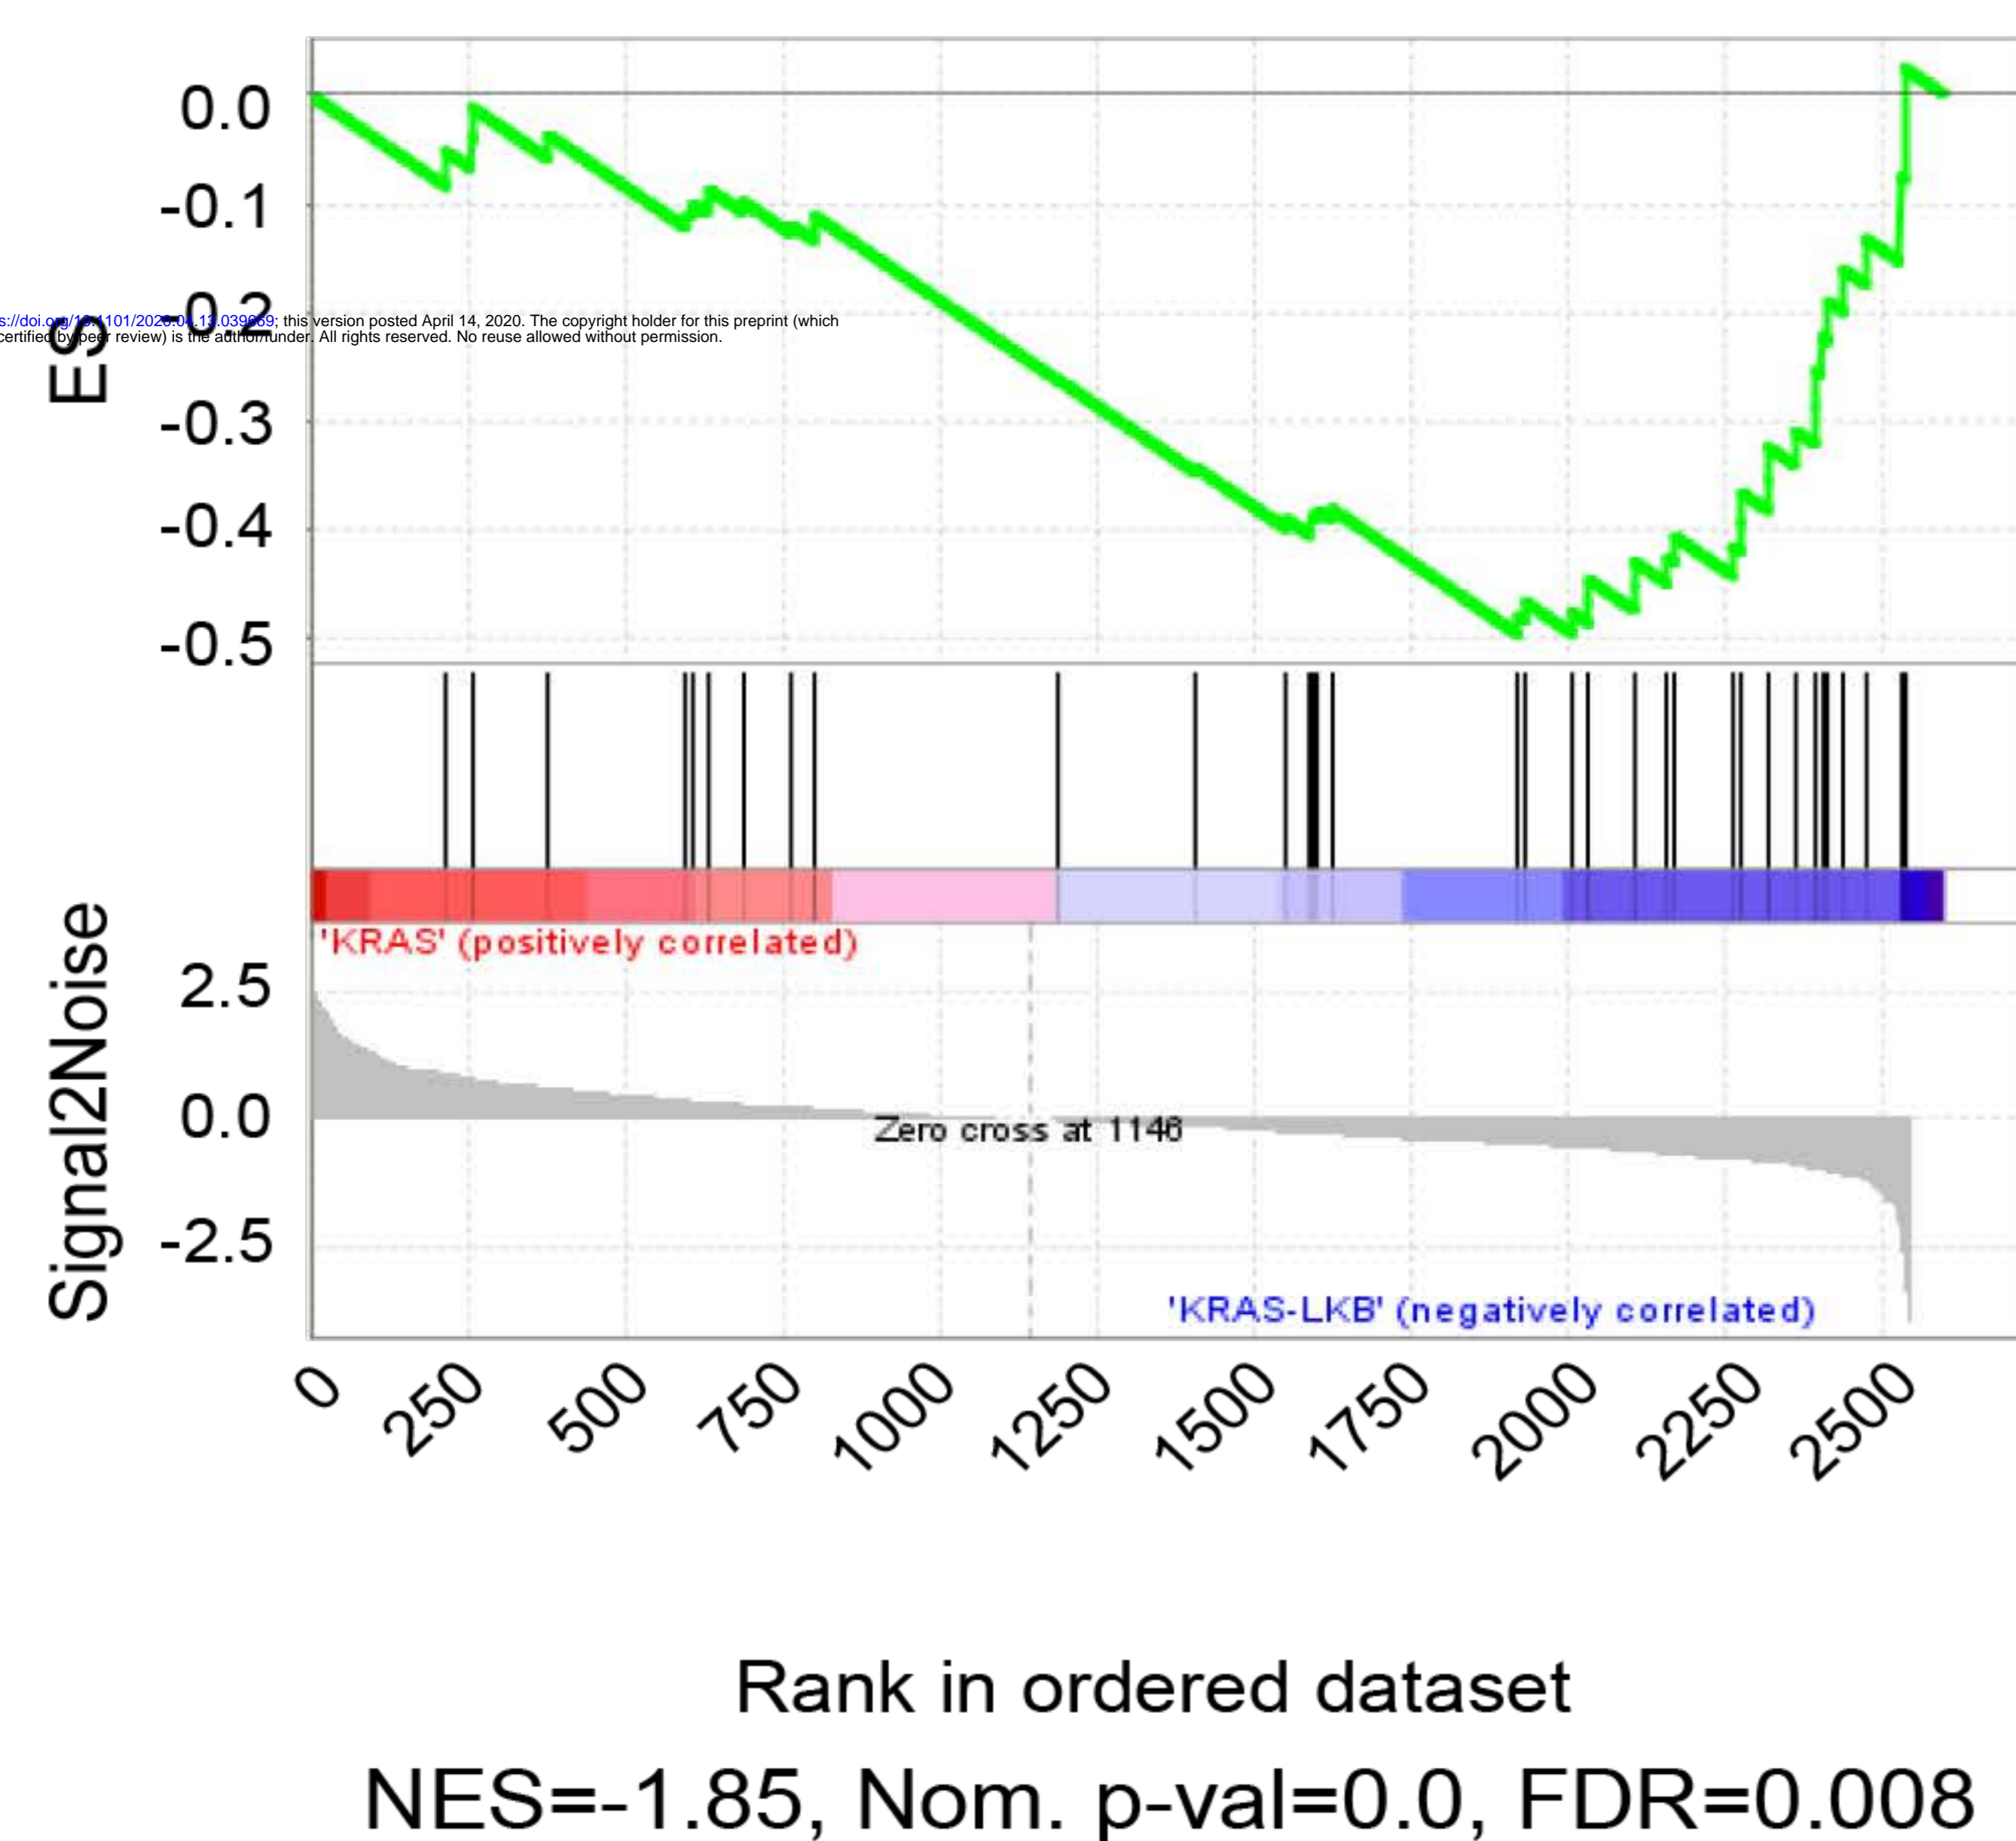

KEGG\_Fructose and mannose metabolism

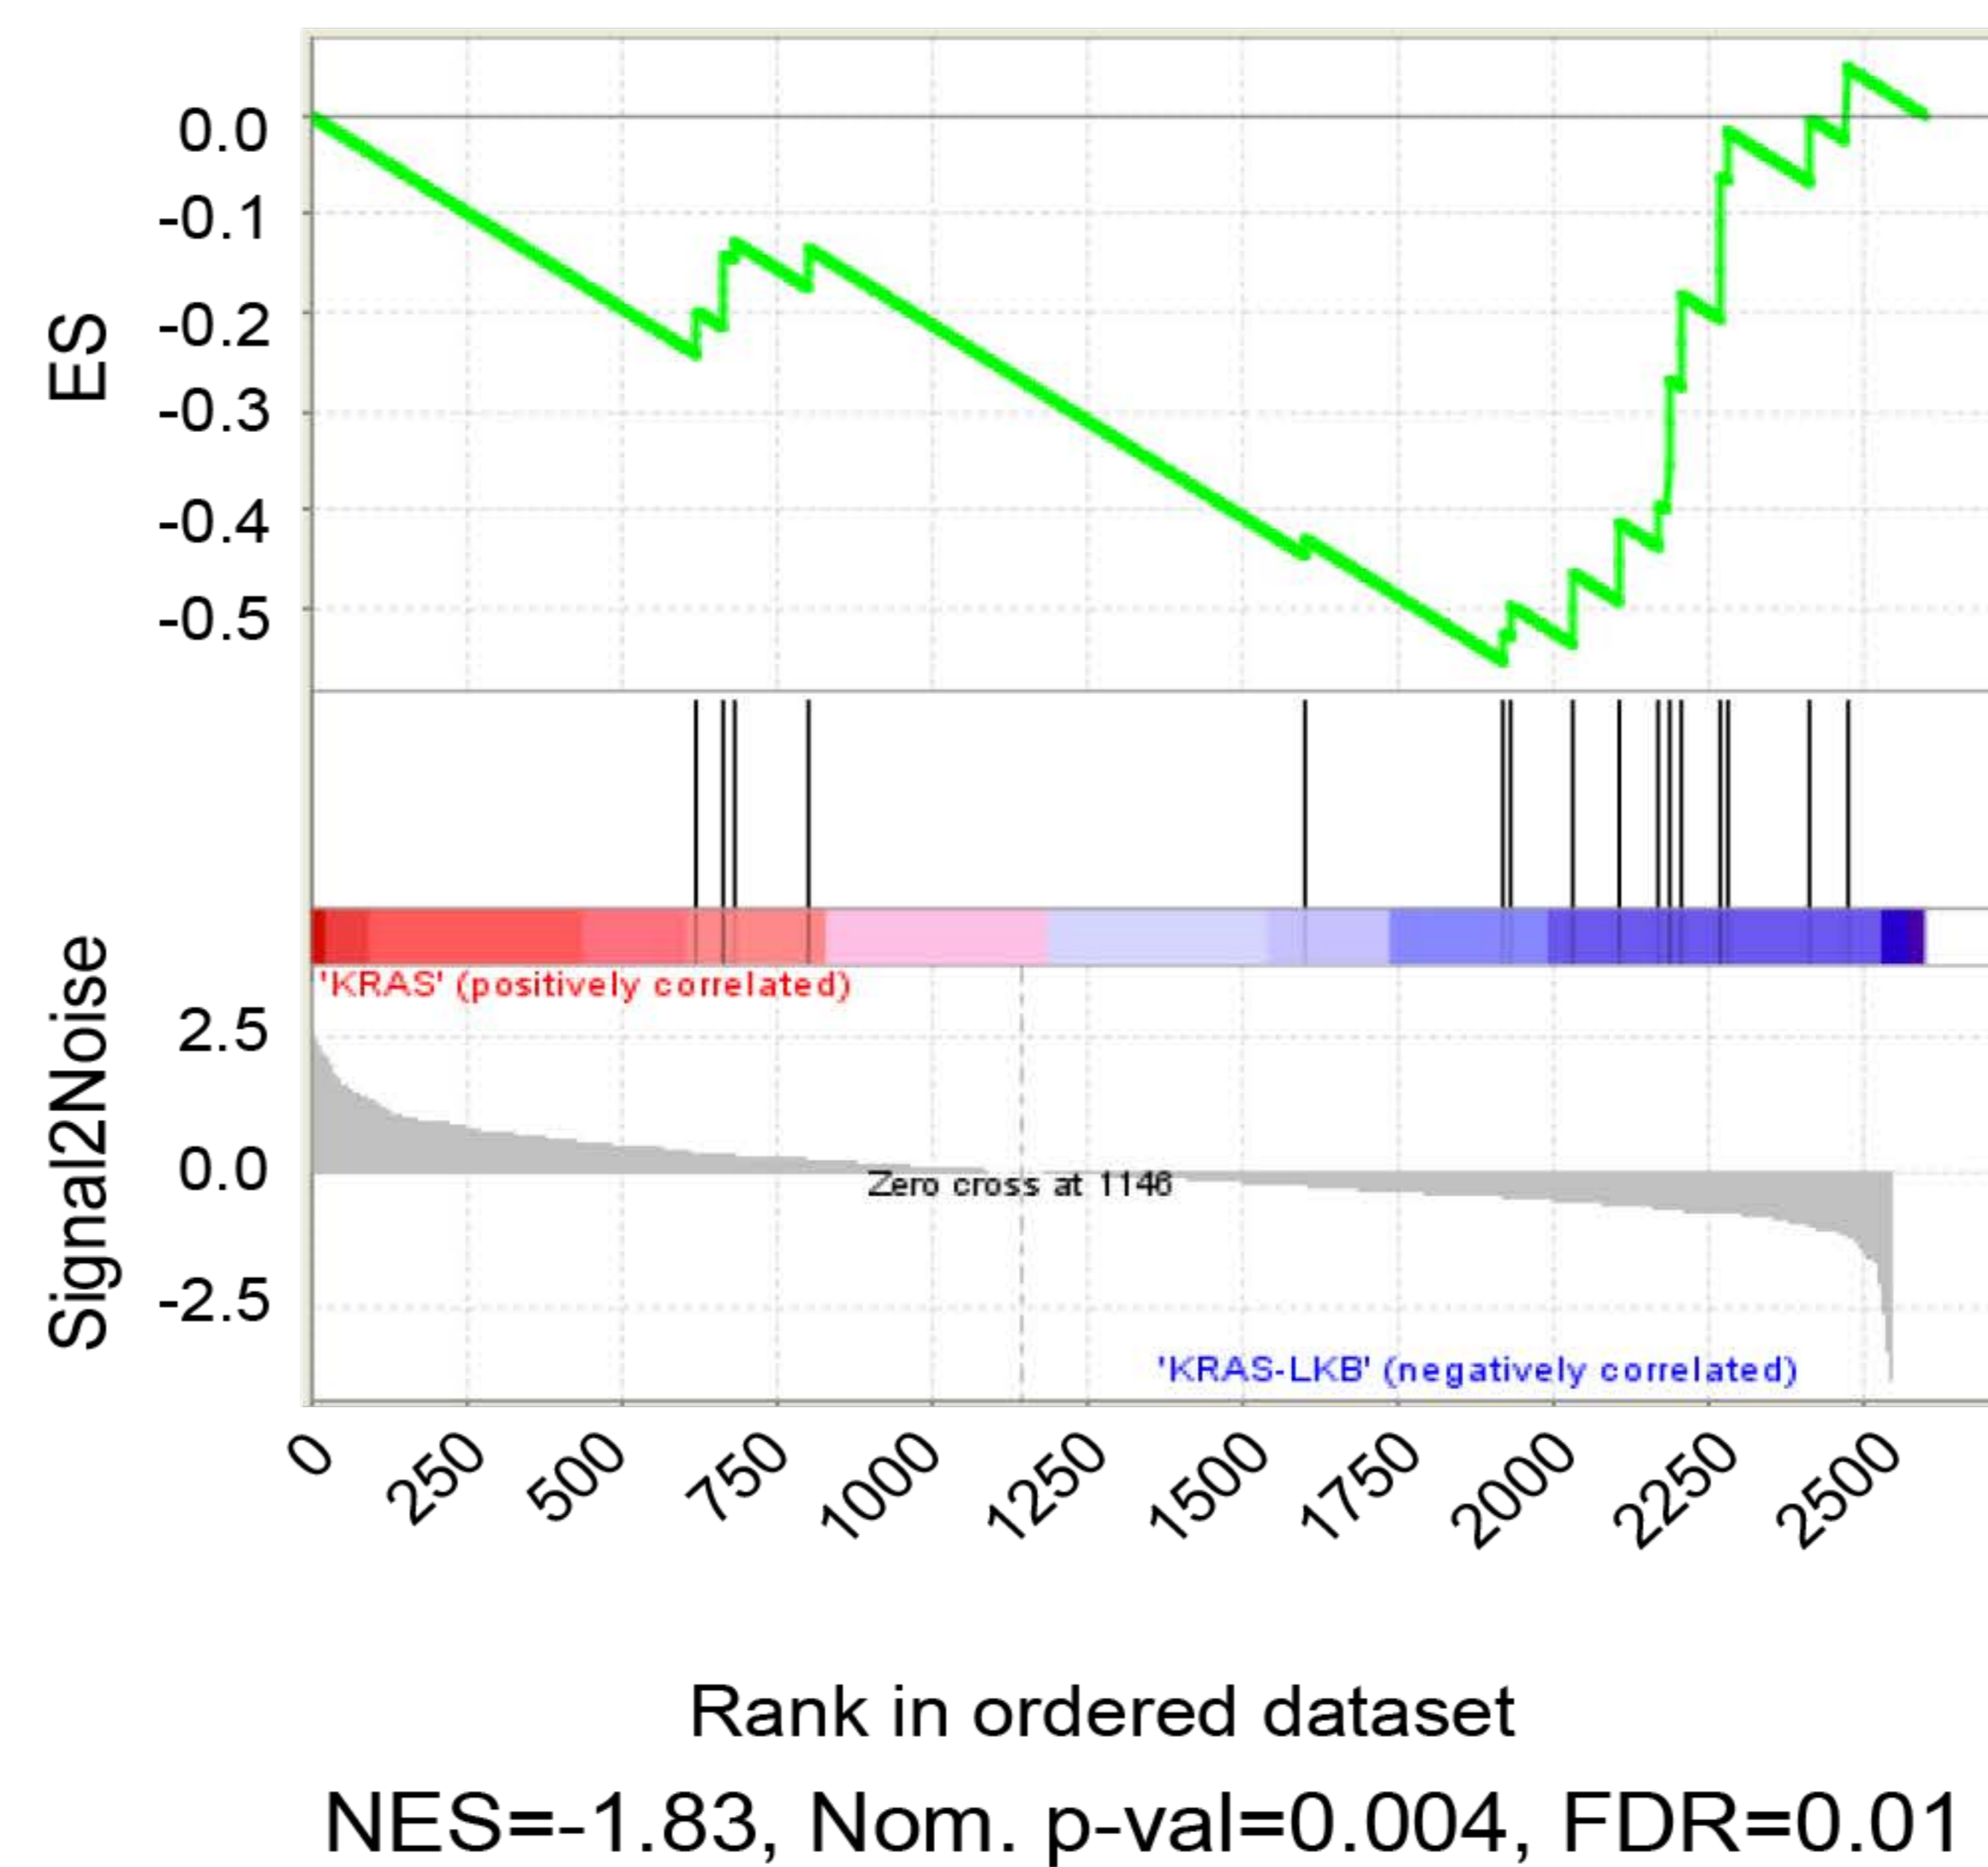

KEGG\_O-Glycan biosynthesis

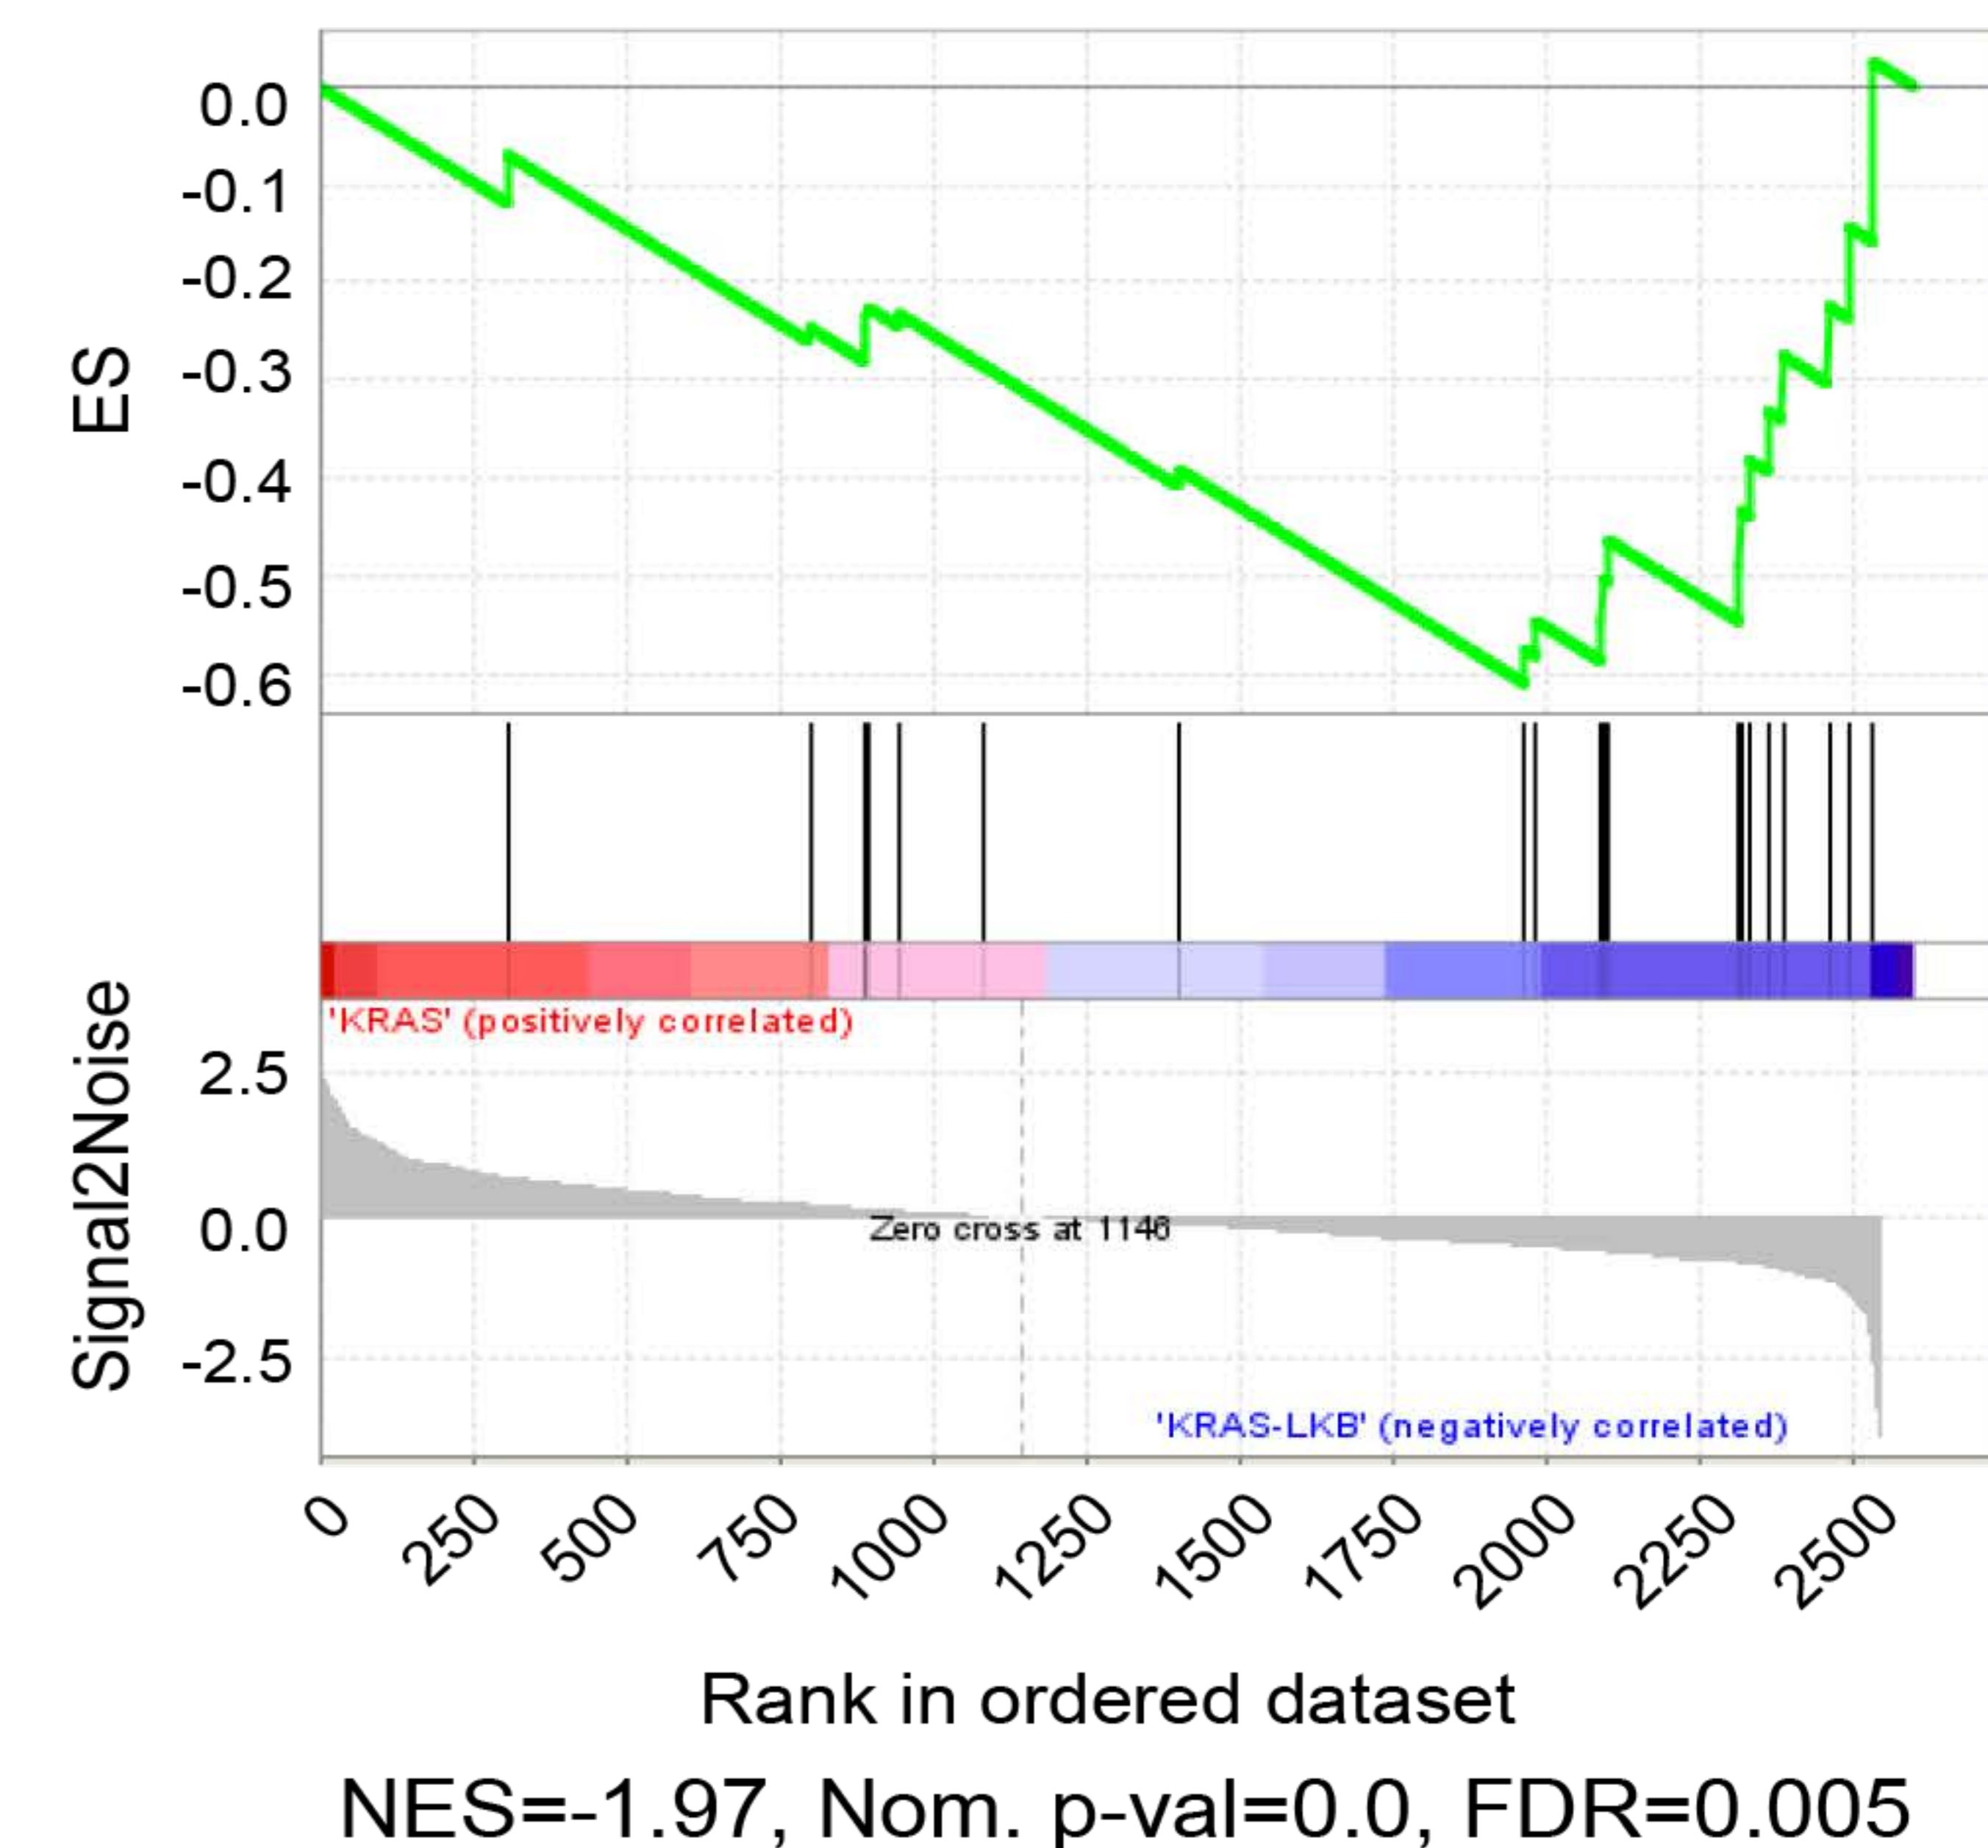



# Figure 2

**a**

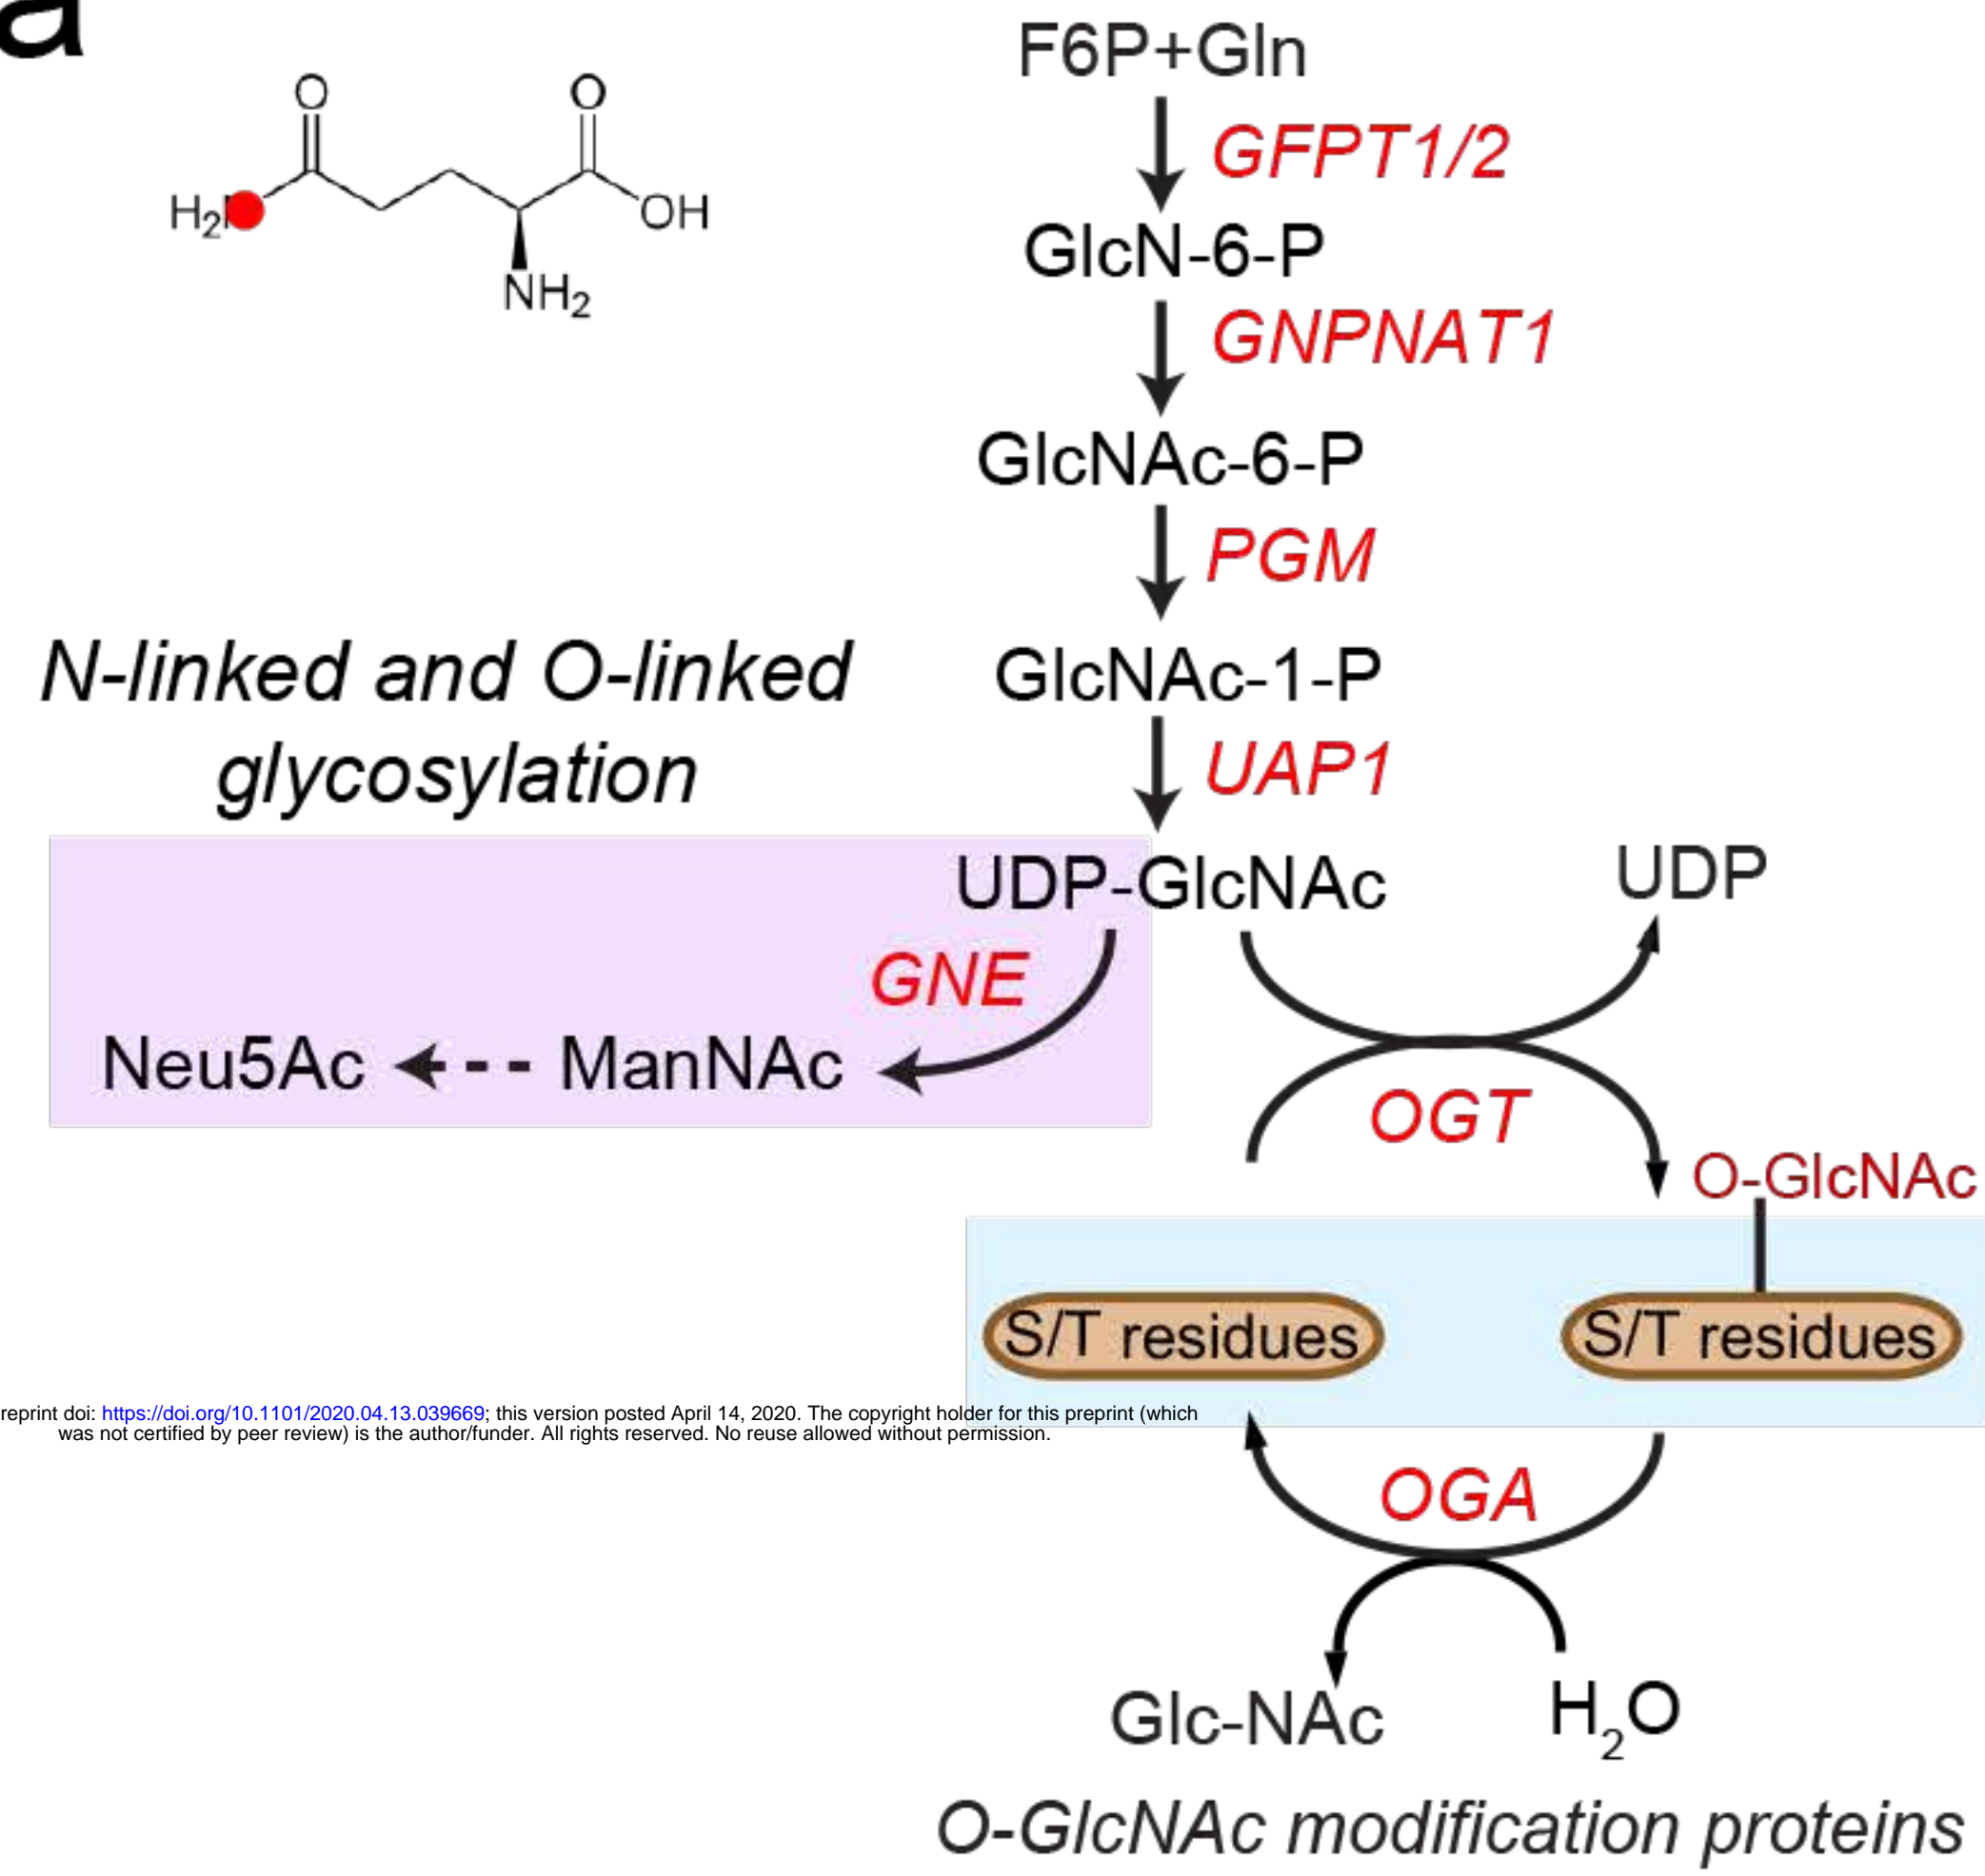

**b**

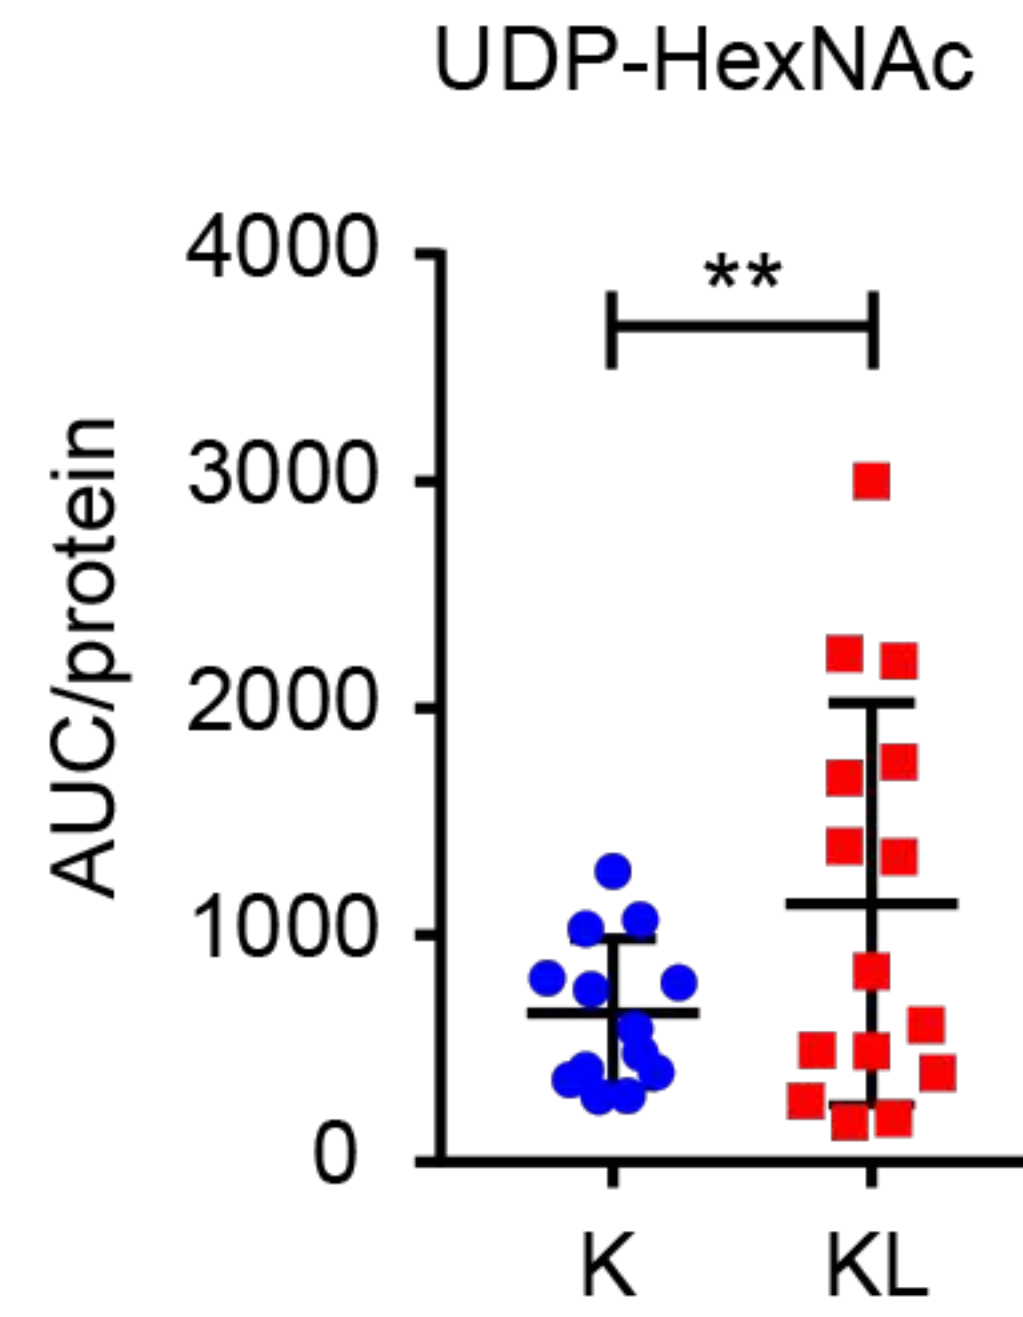

**c**

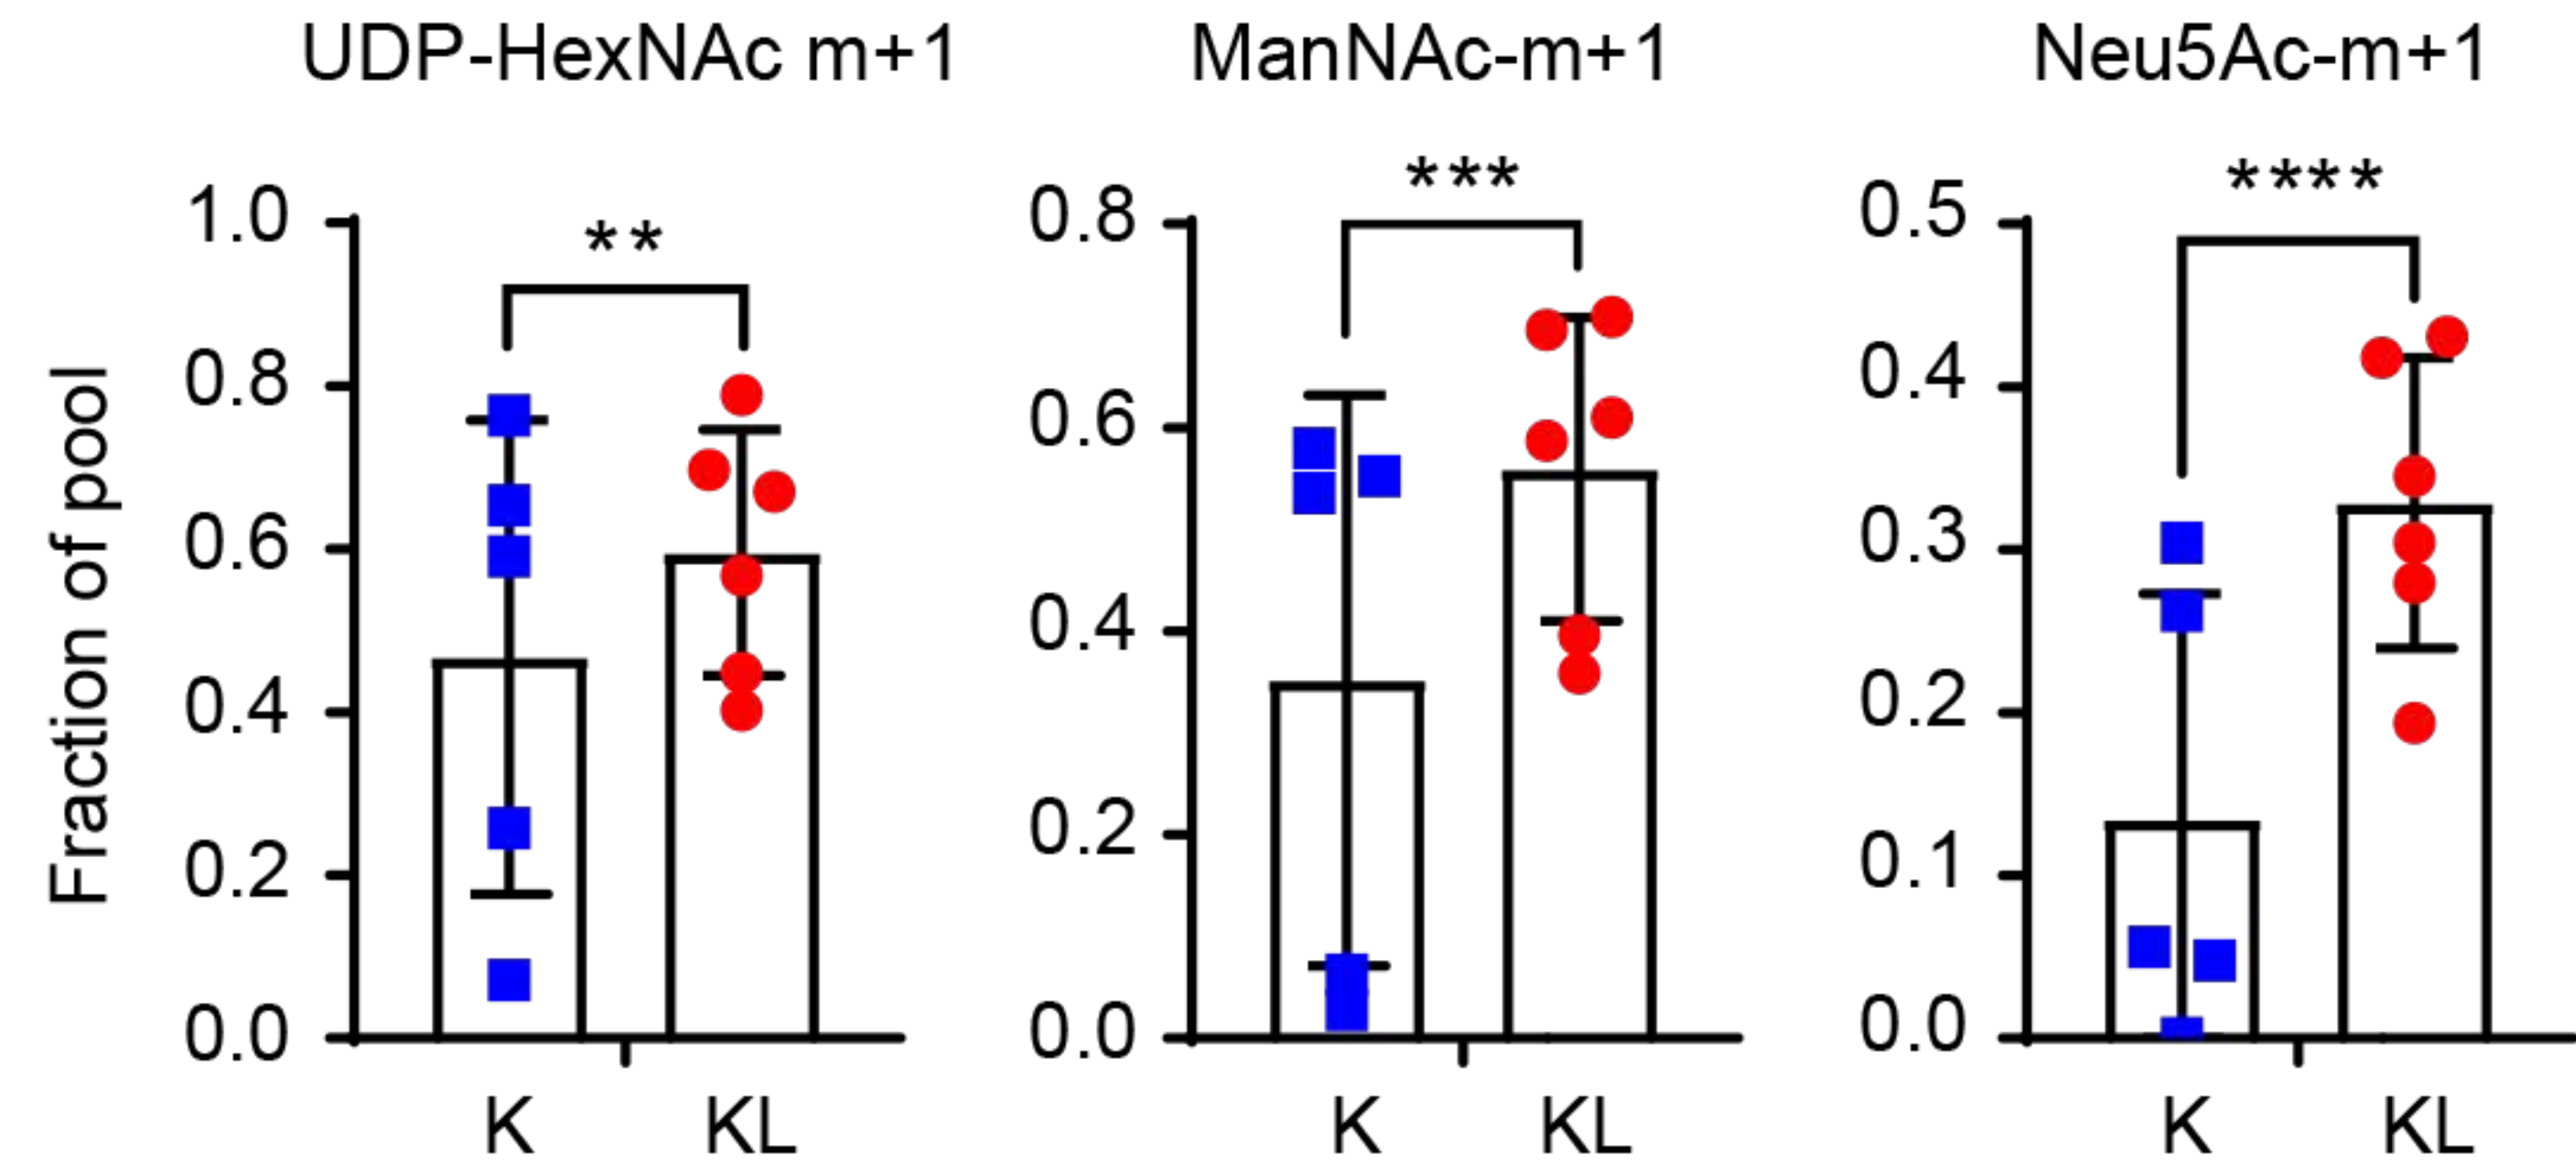

**d**

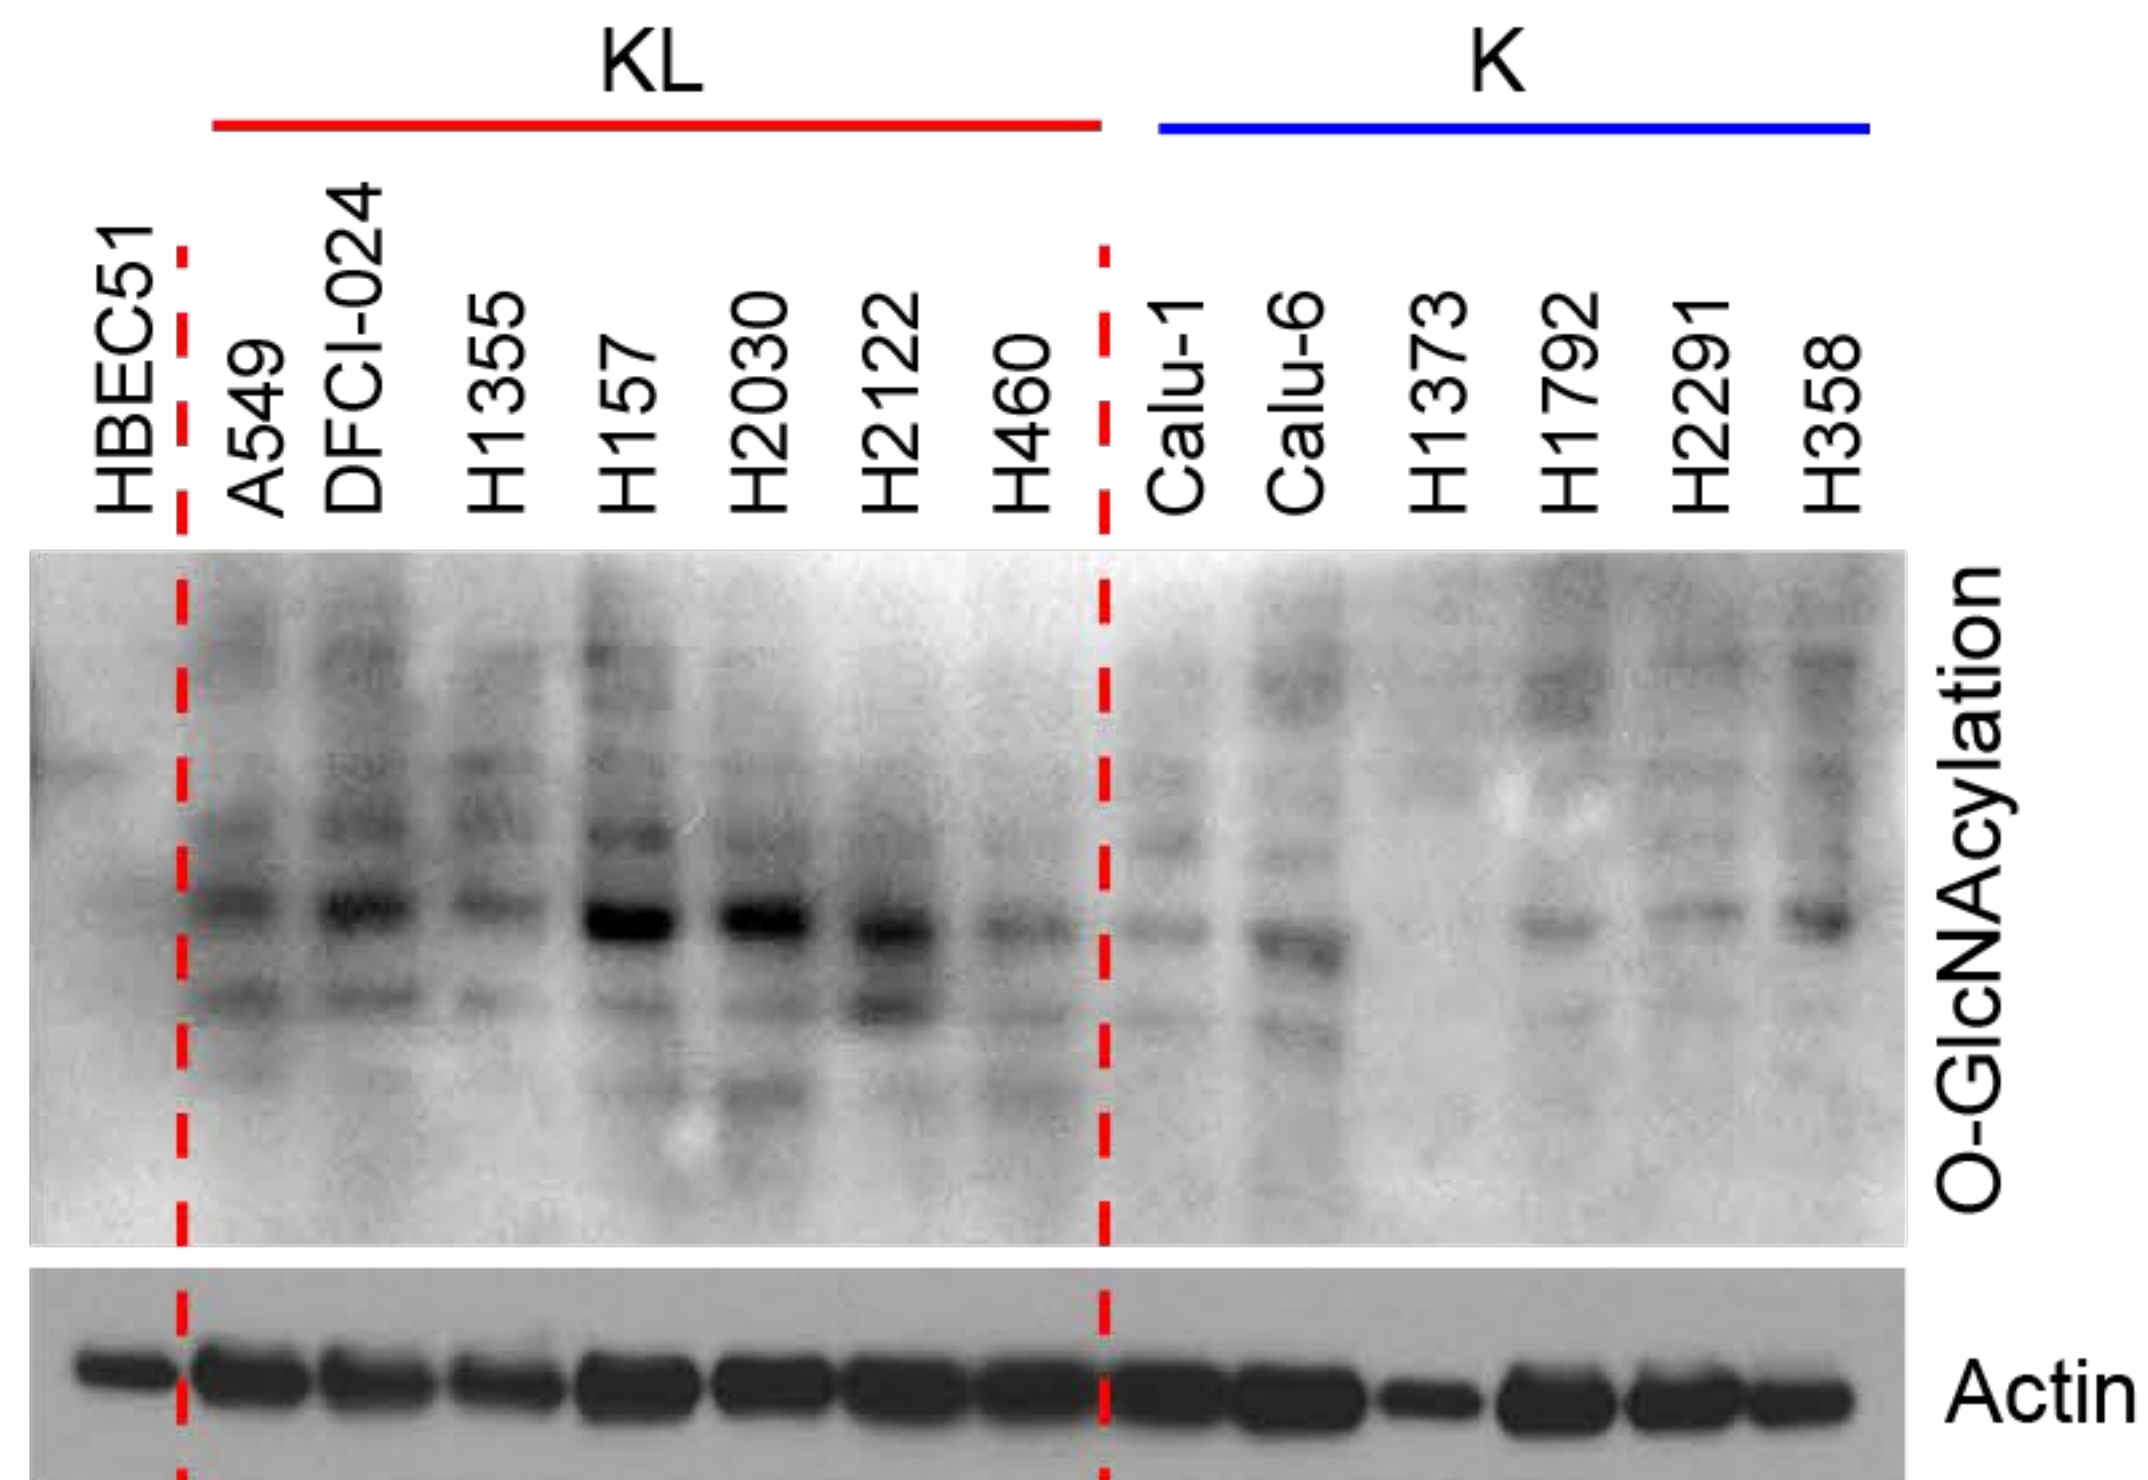

**e**

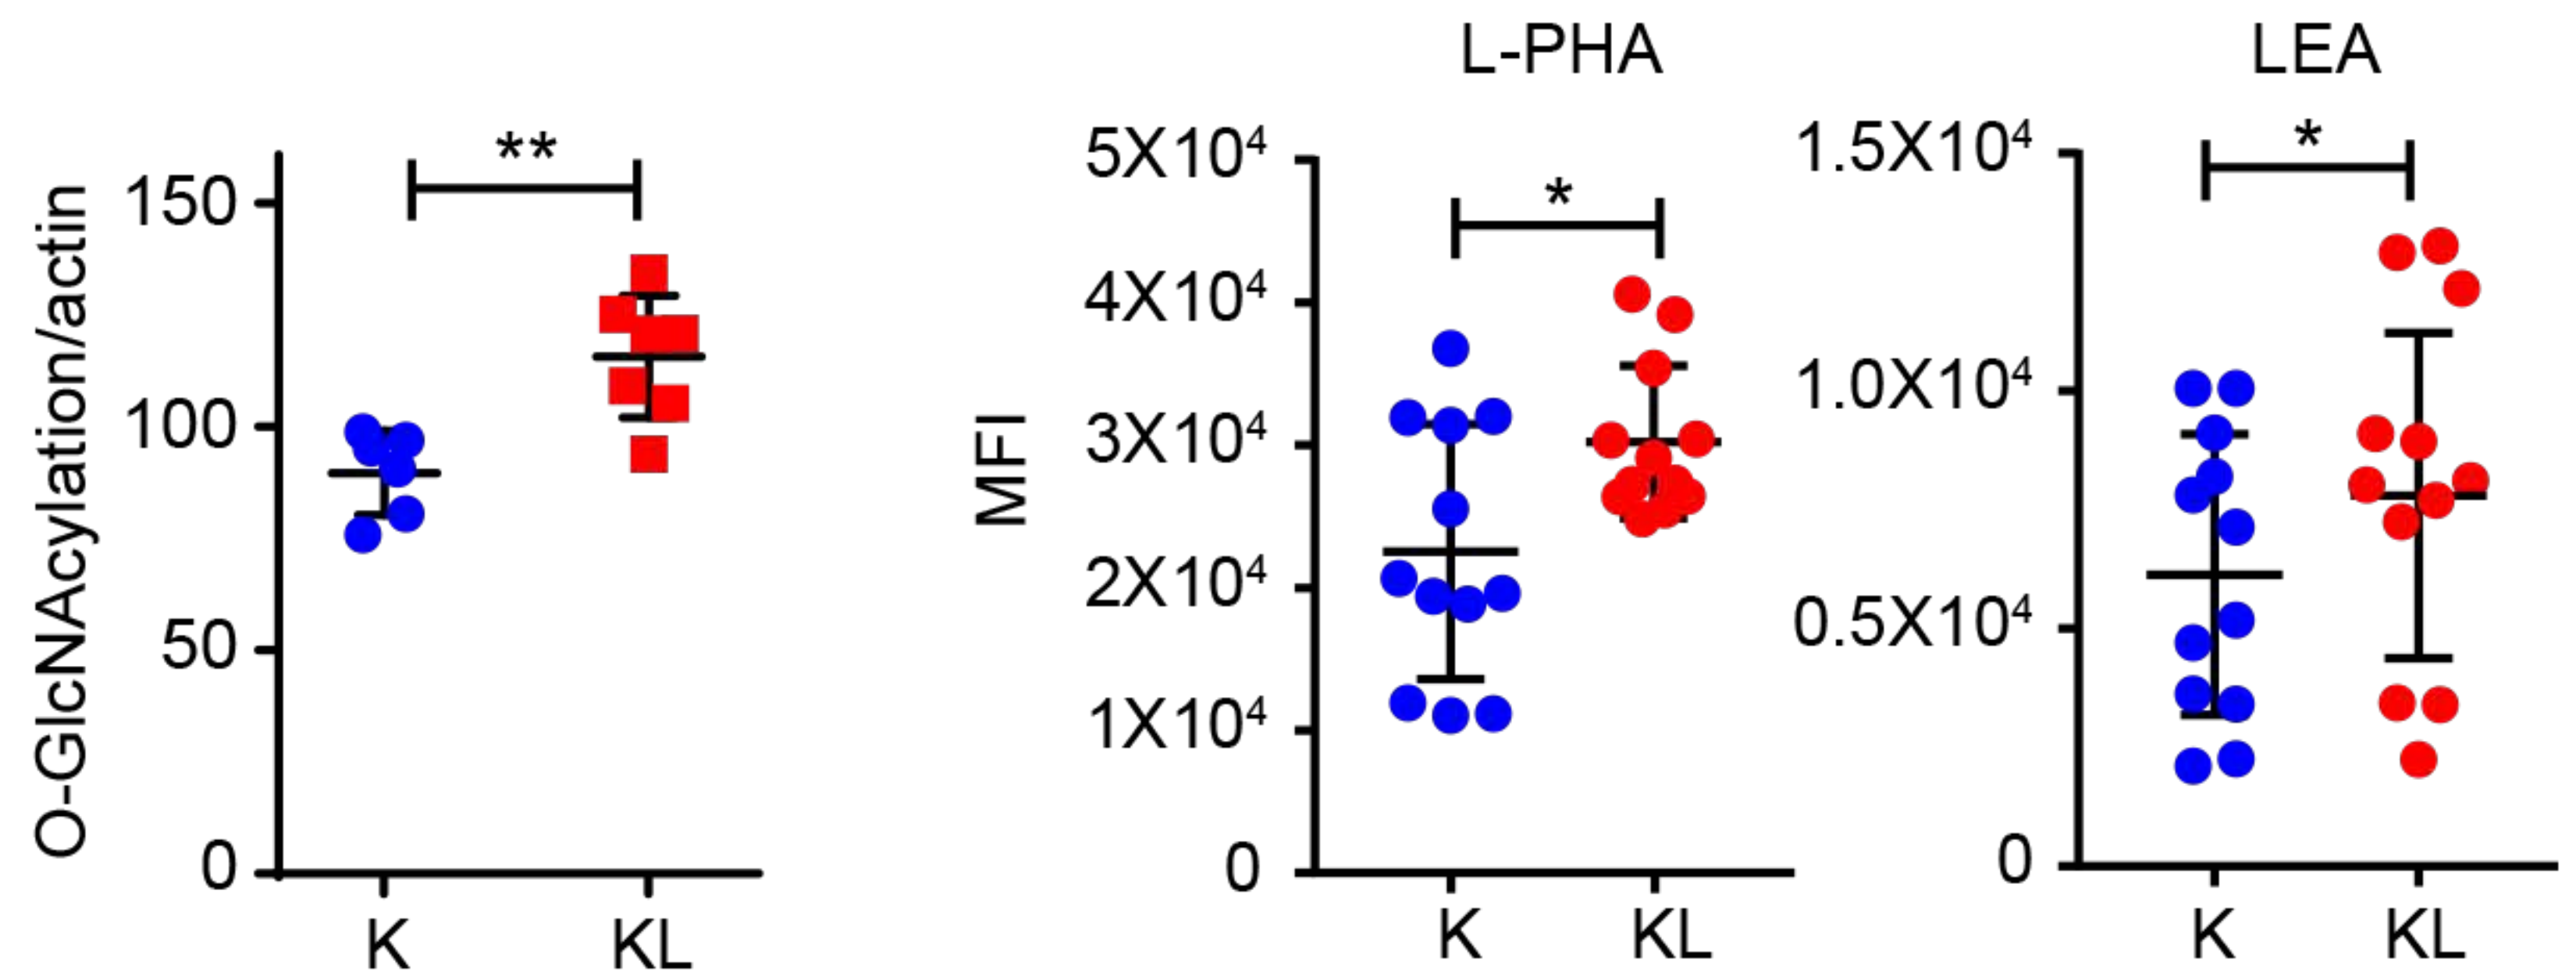



# Figure 3

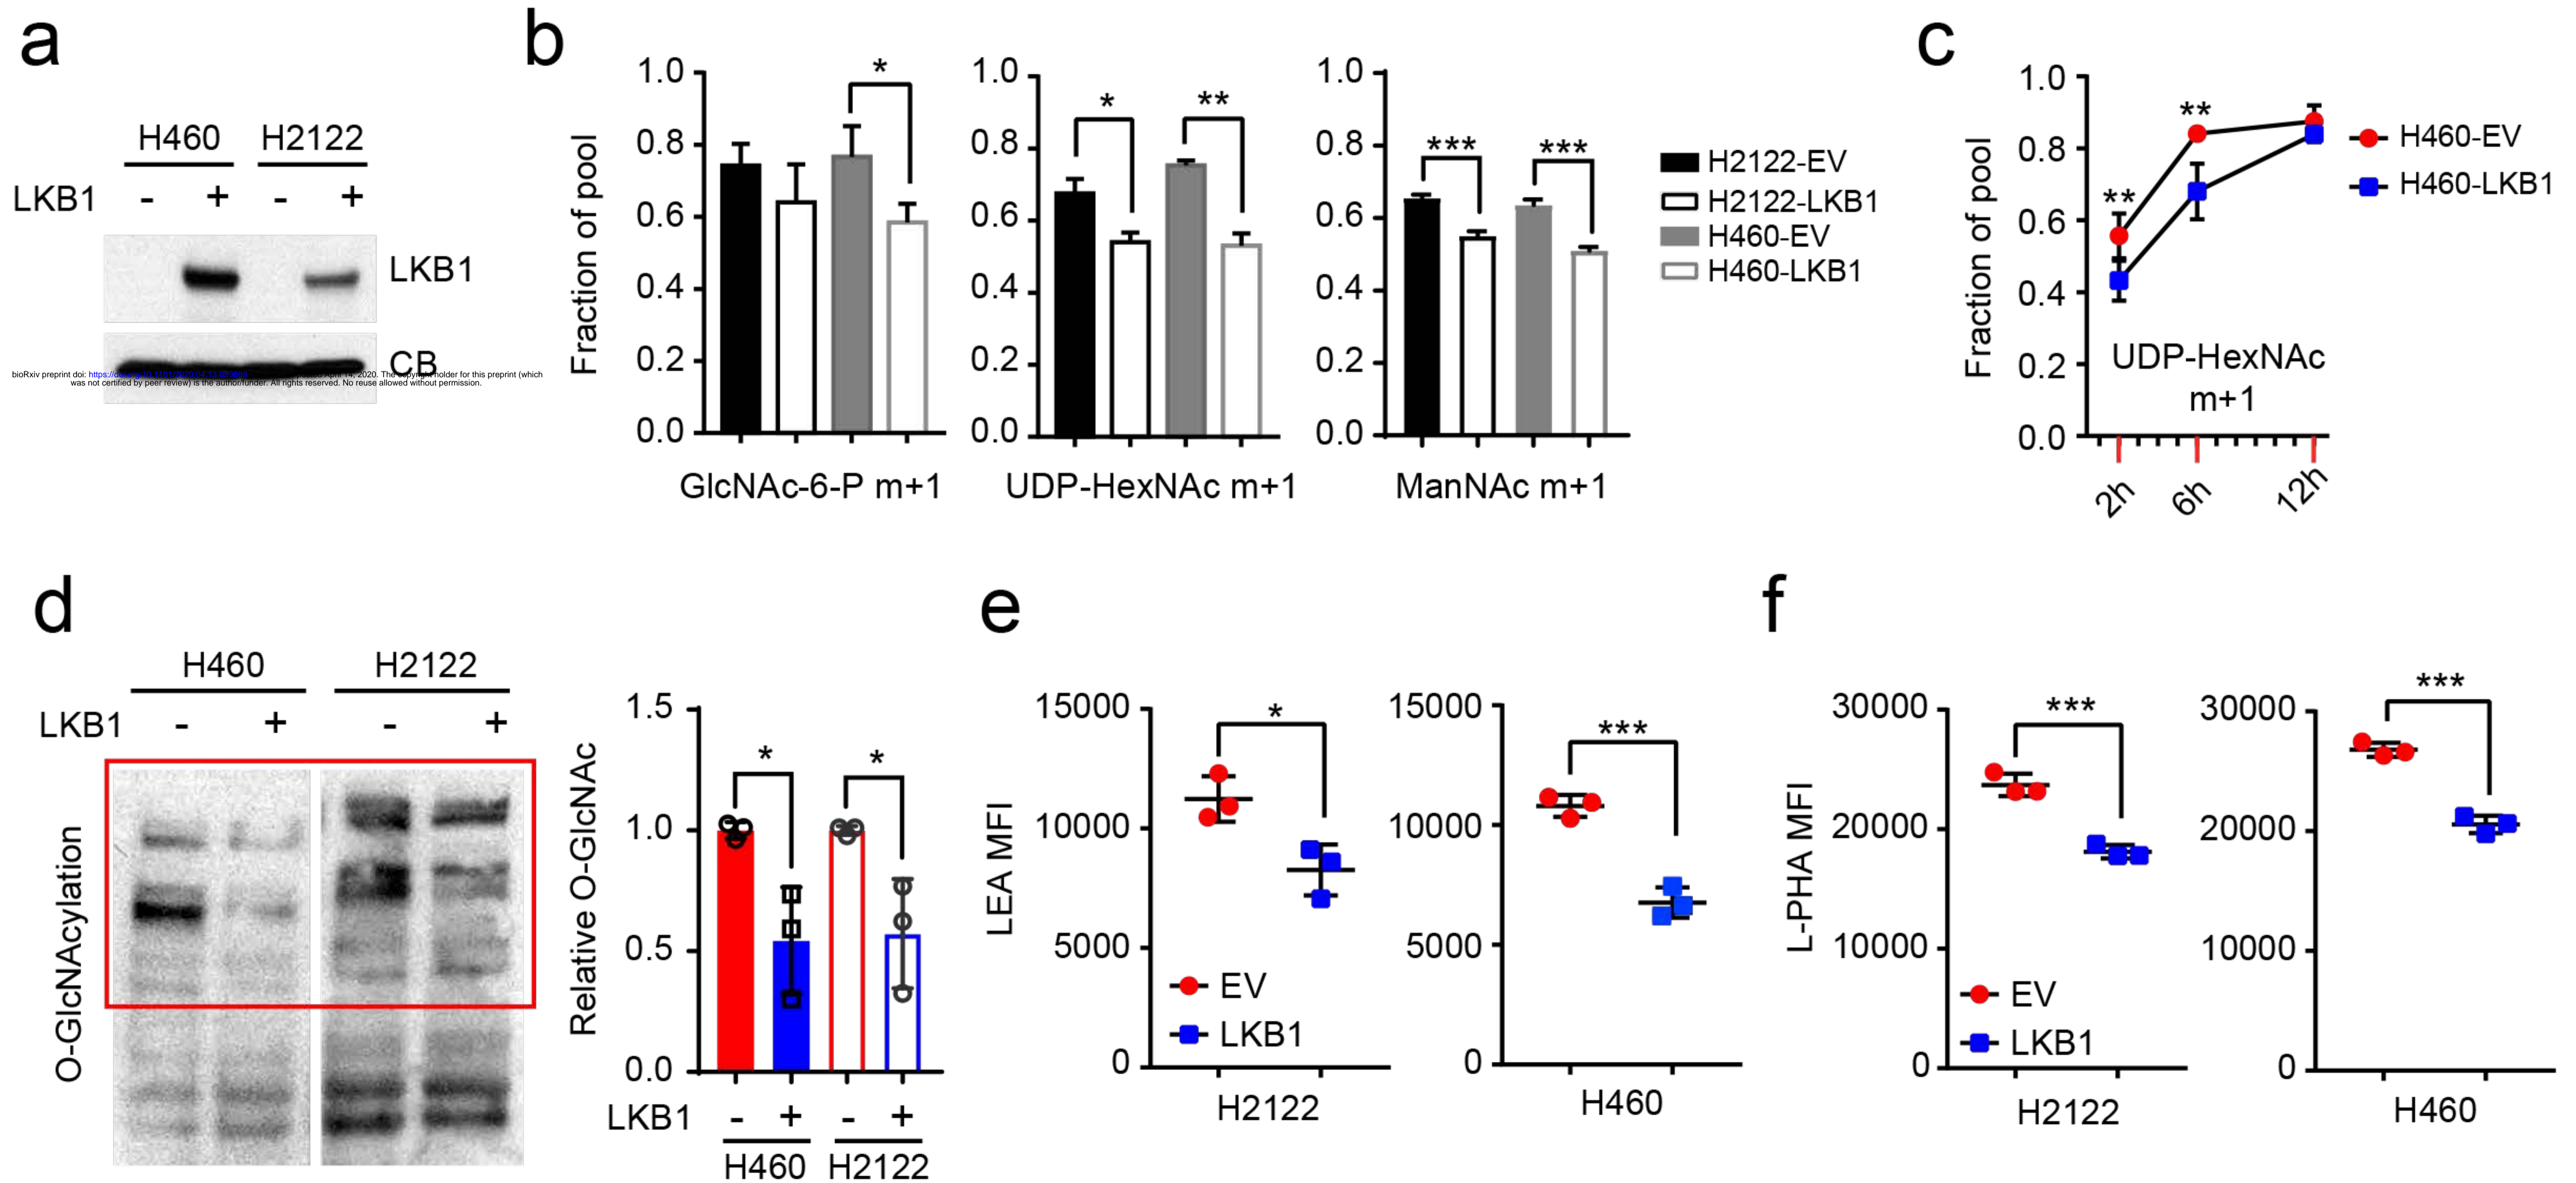



# Figure 4

**a**

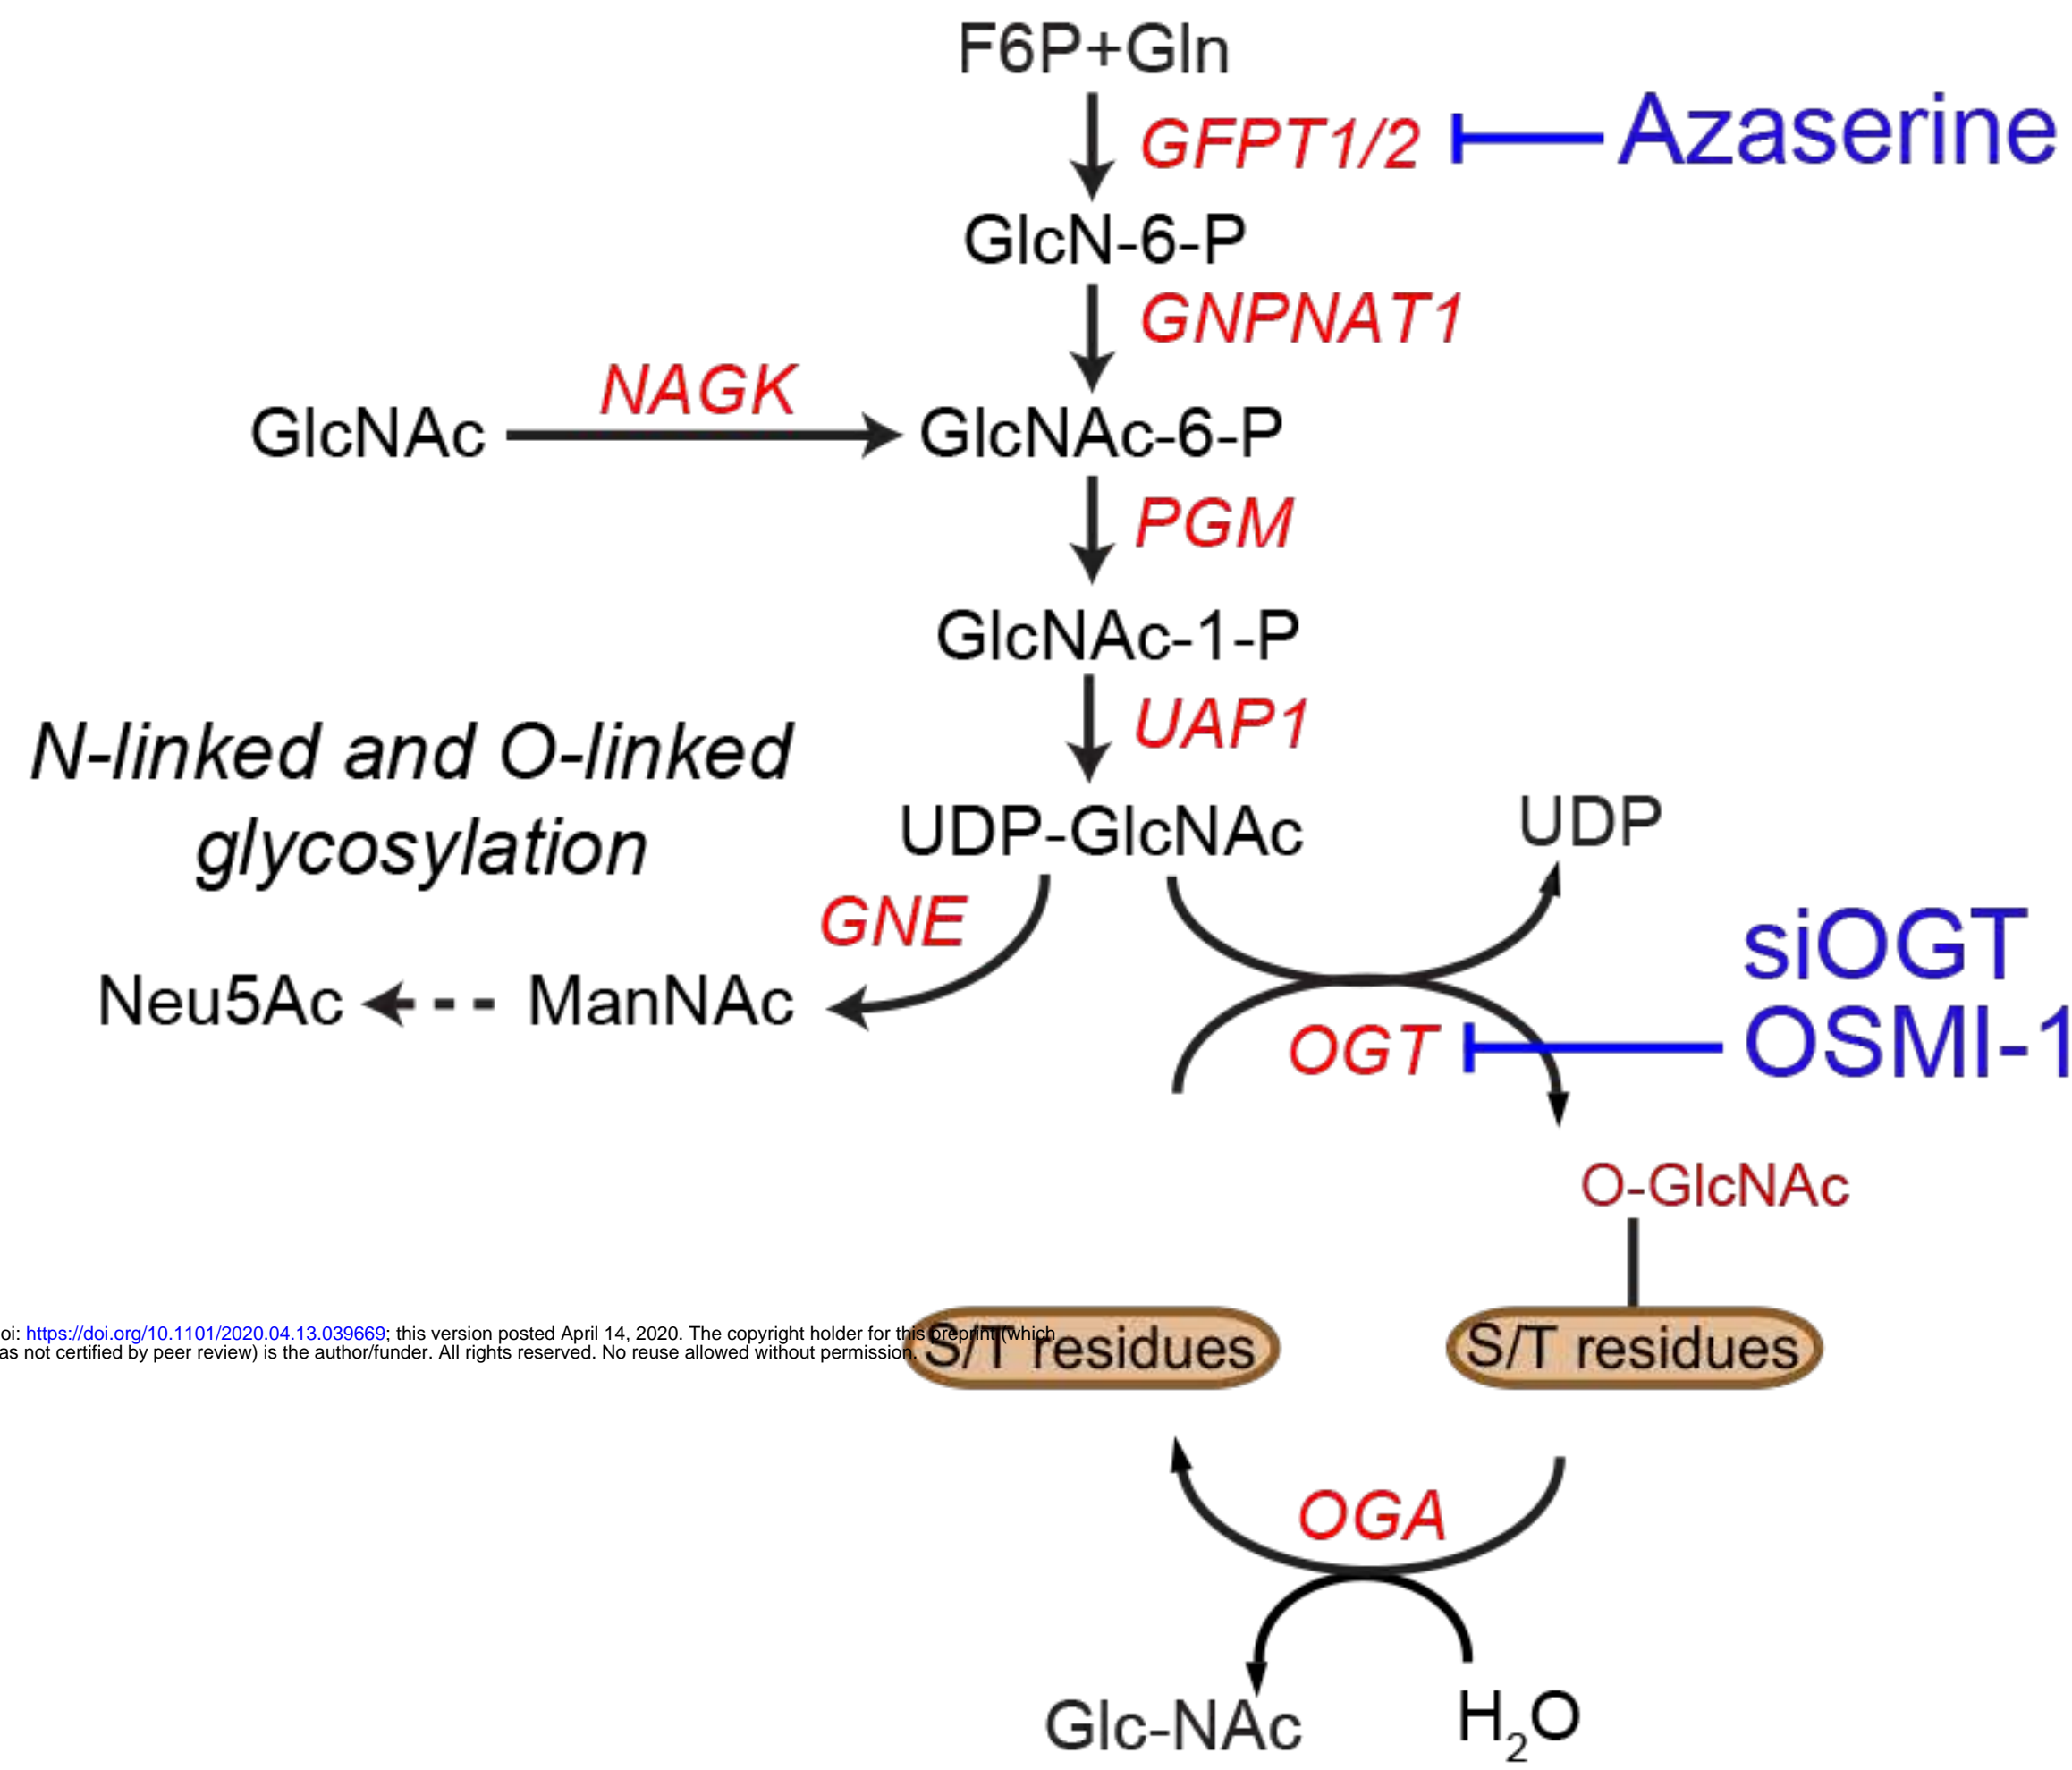

bioRxiv preprint doi: <https://doi.org/10.1101/2020.04.13.039669>; this version posted April 14, 2020. The copyright holder for this preprint (which was not certified by peer review) is the author/funder. All rights reserved. No reuse allowed without permission.

**b**

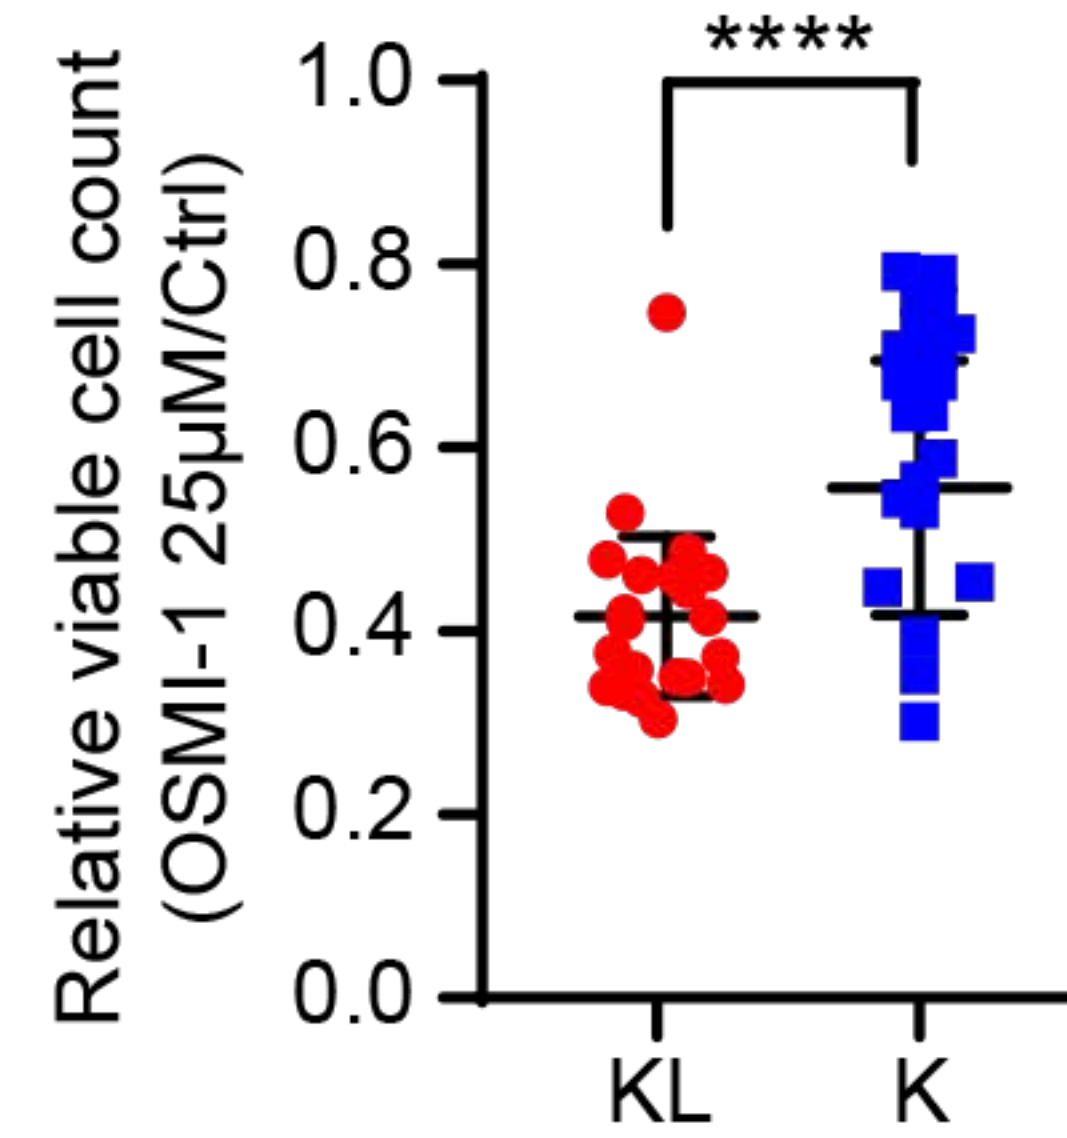

**c**

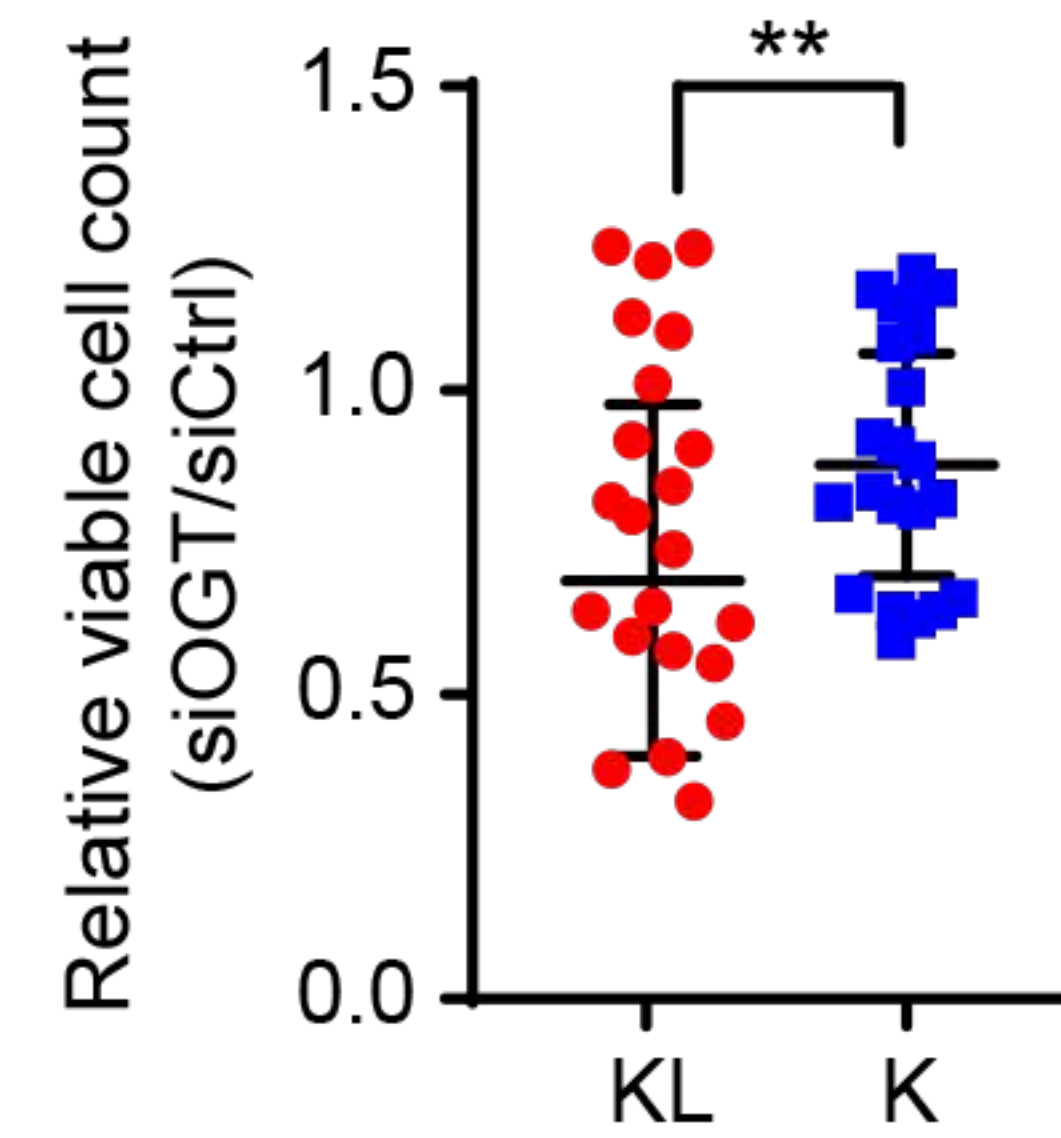

**d**

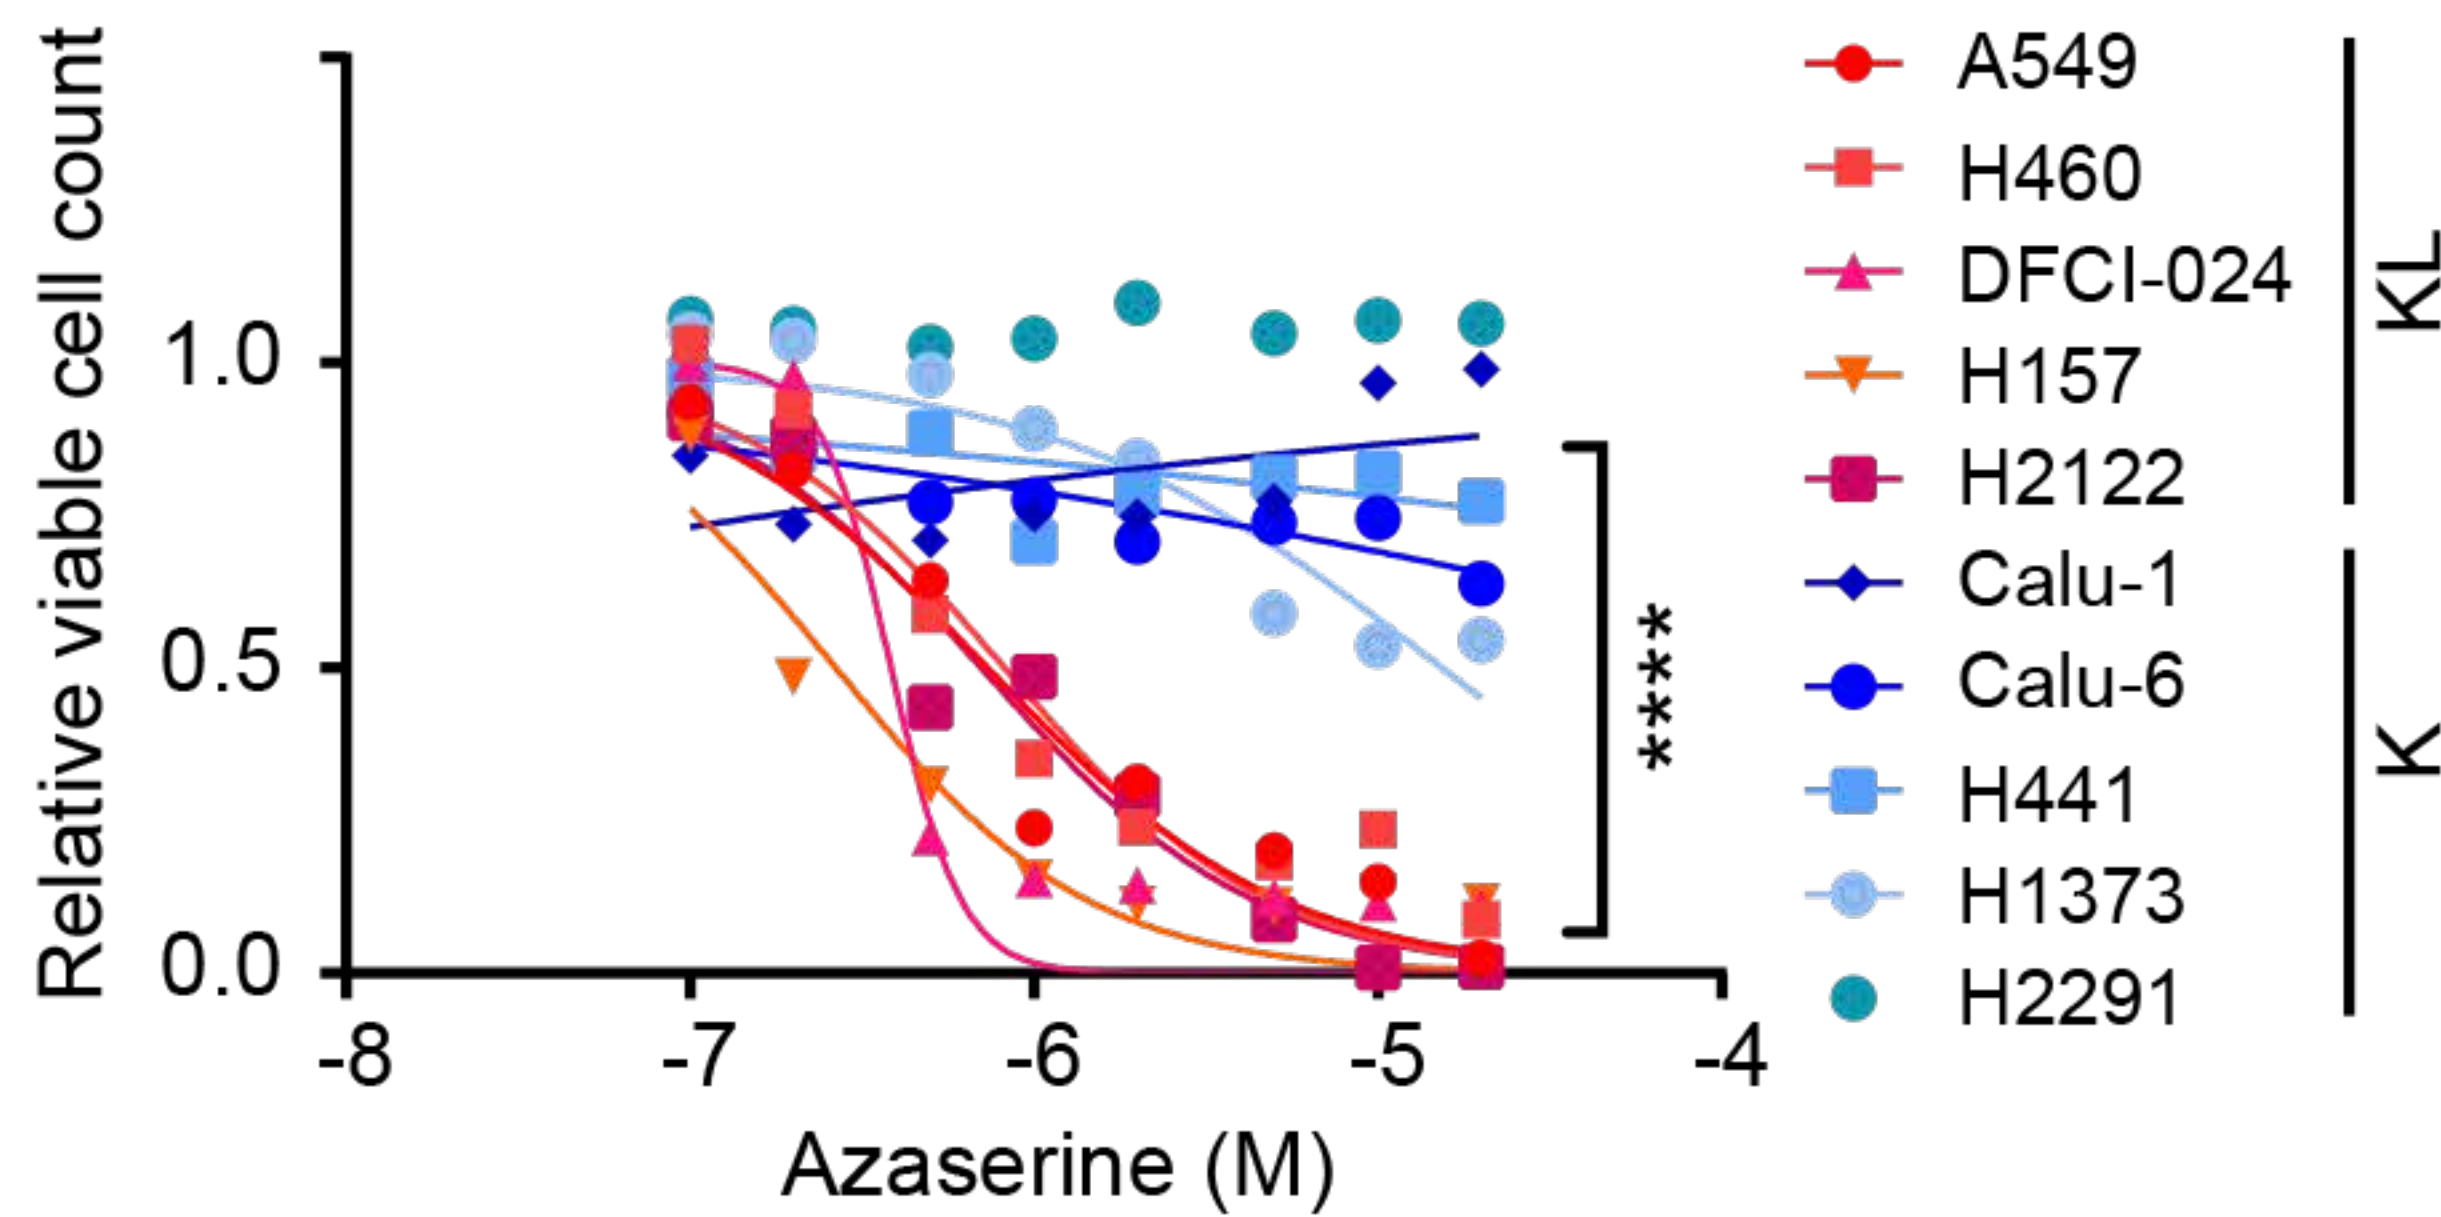

**e**

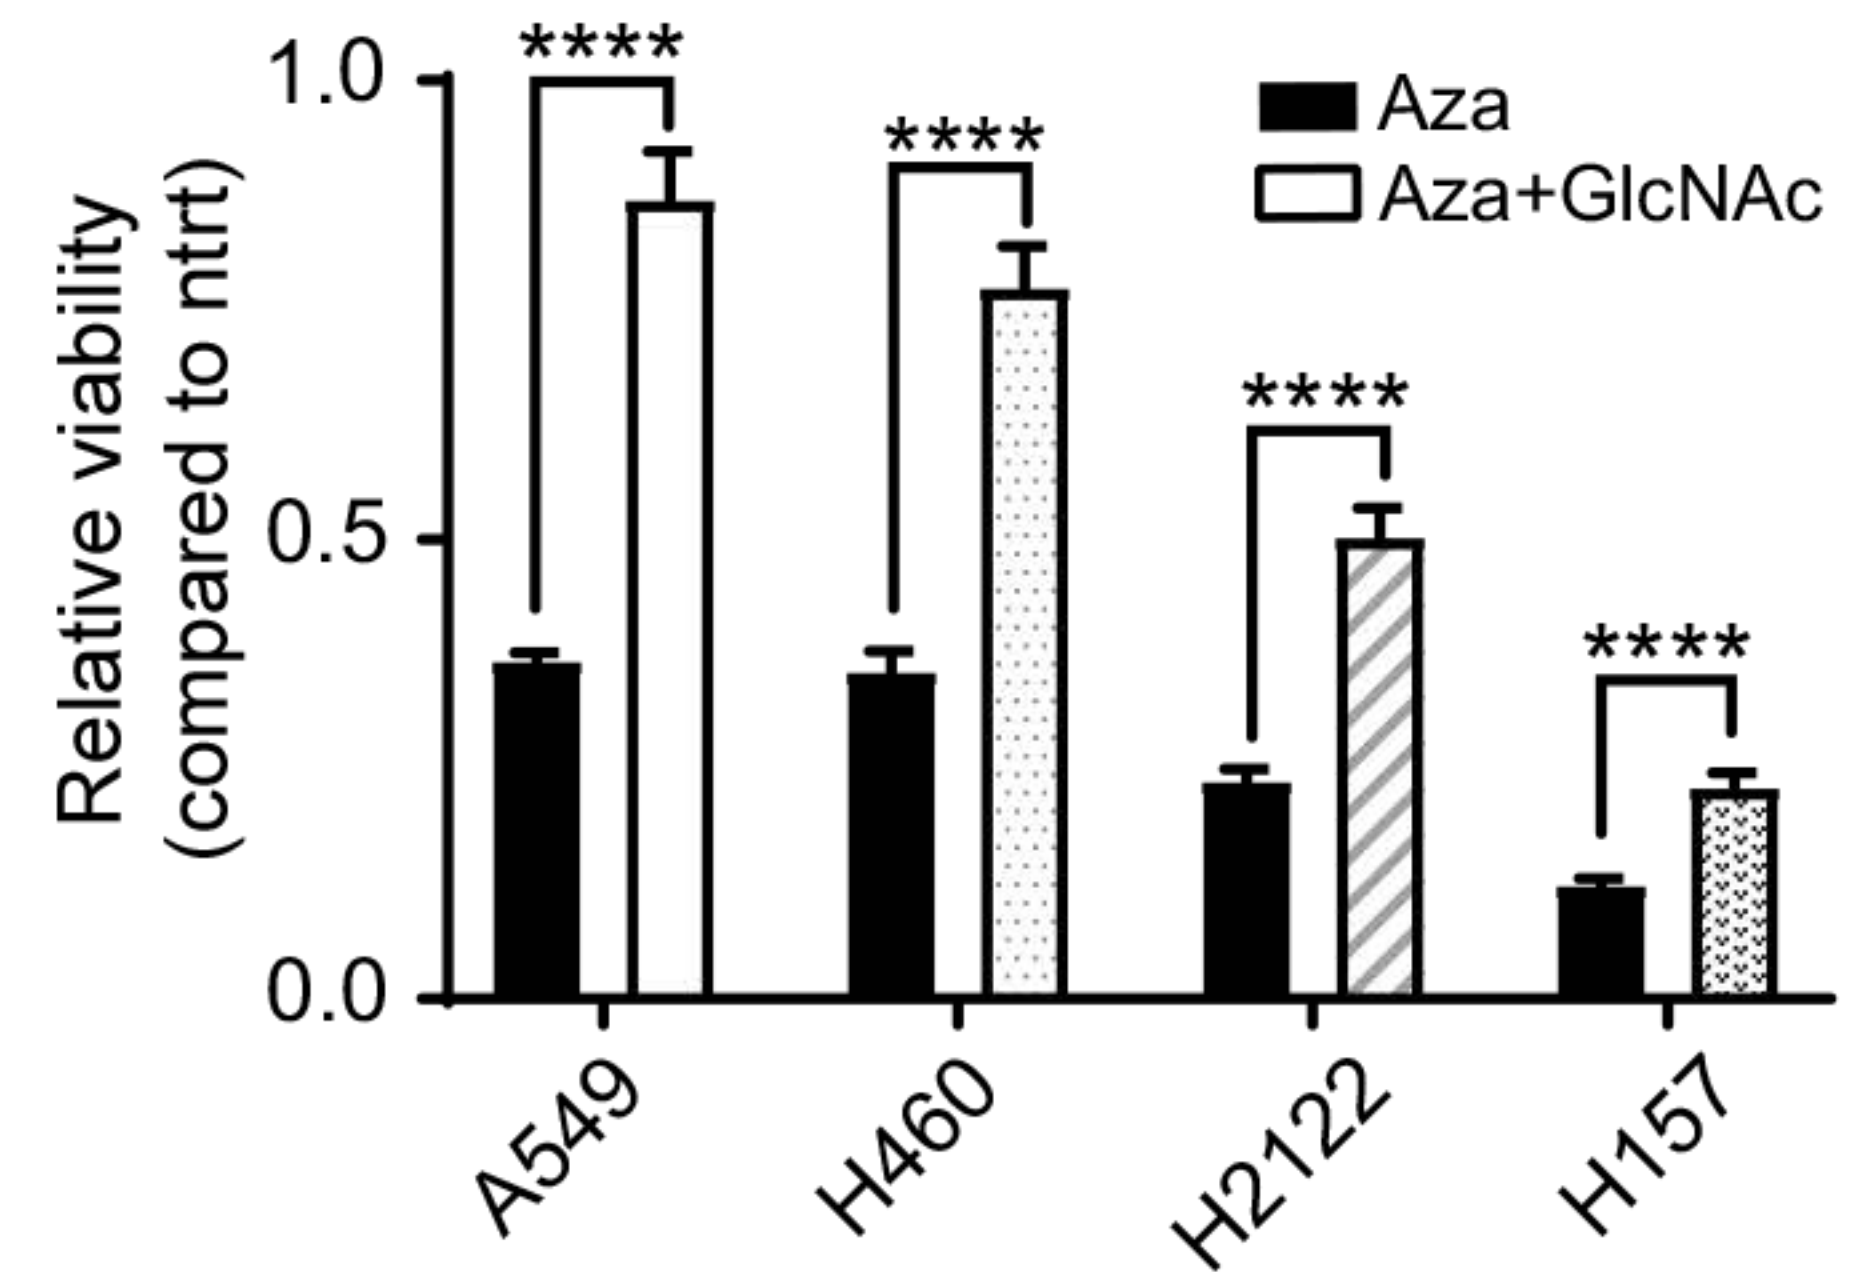



# Figure 5

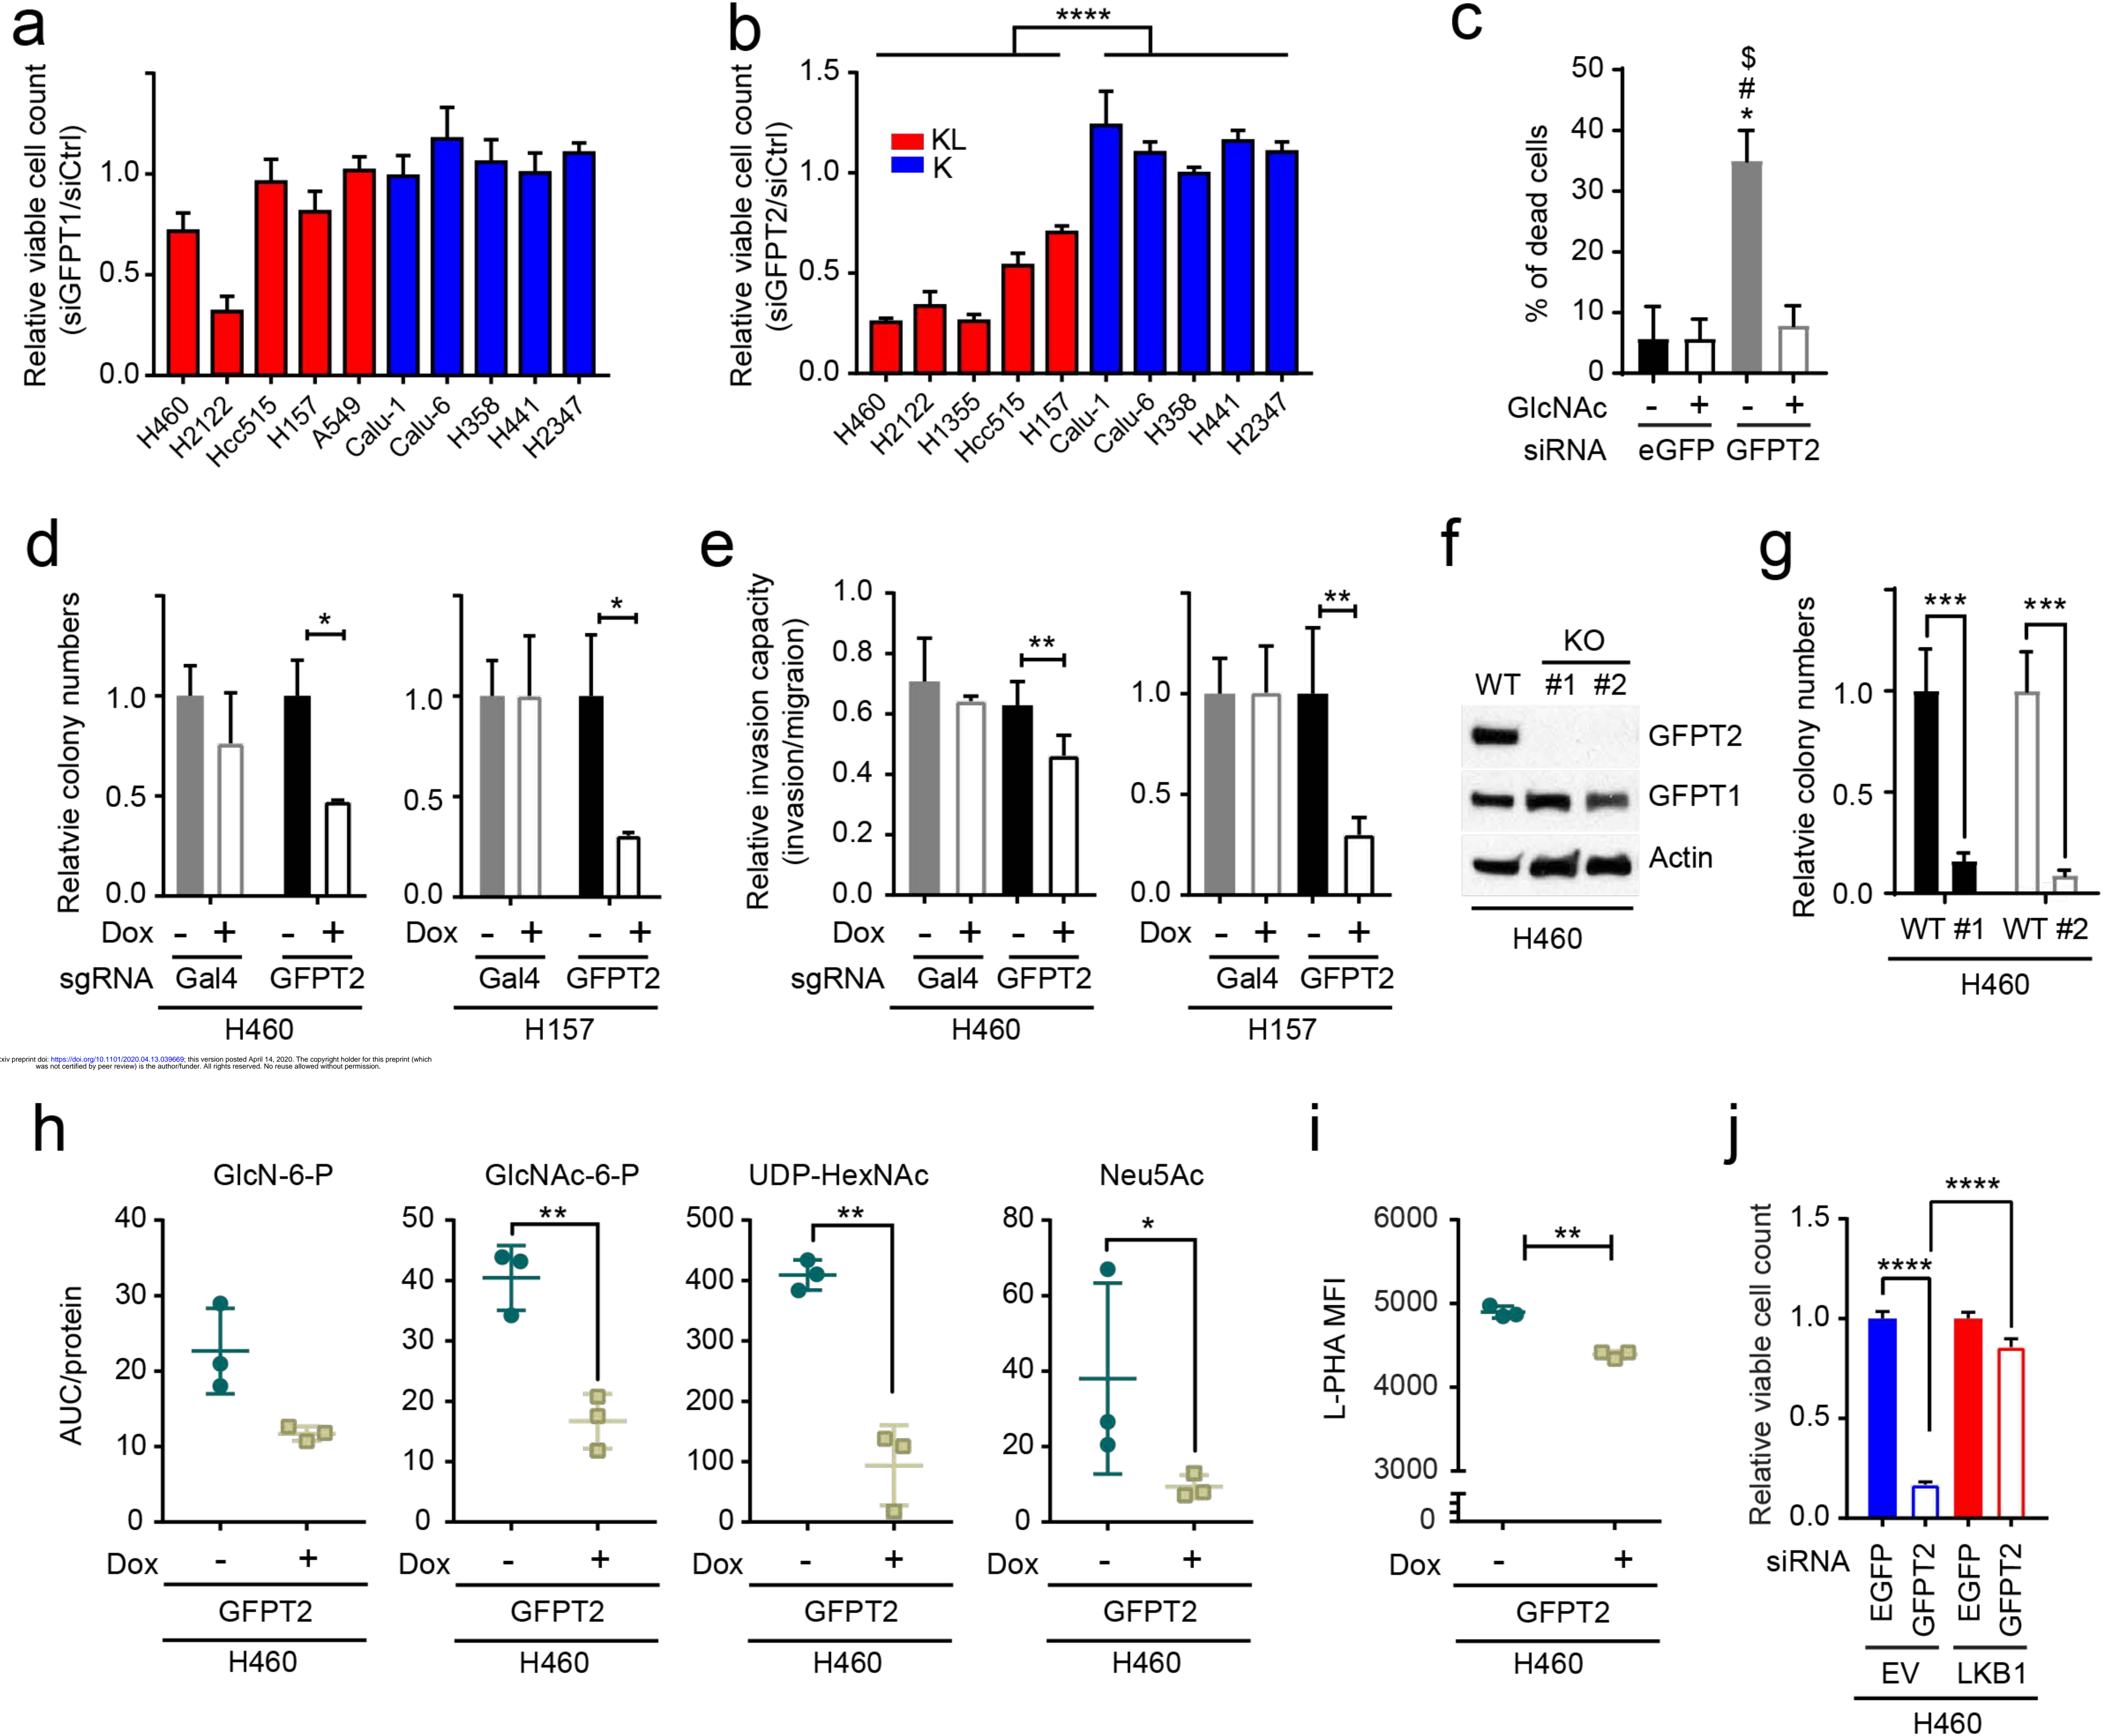



# Figure 6

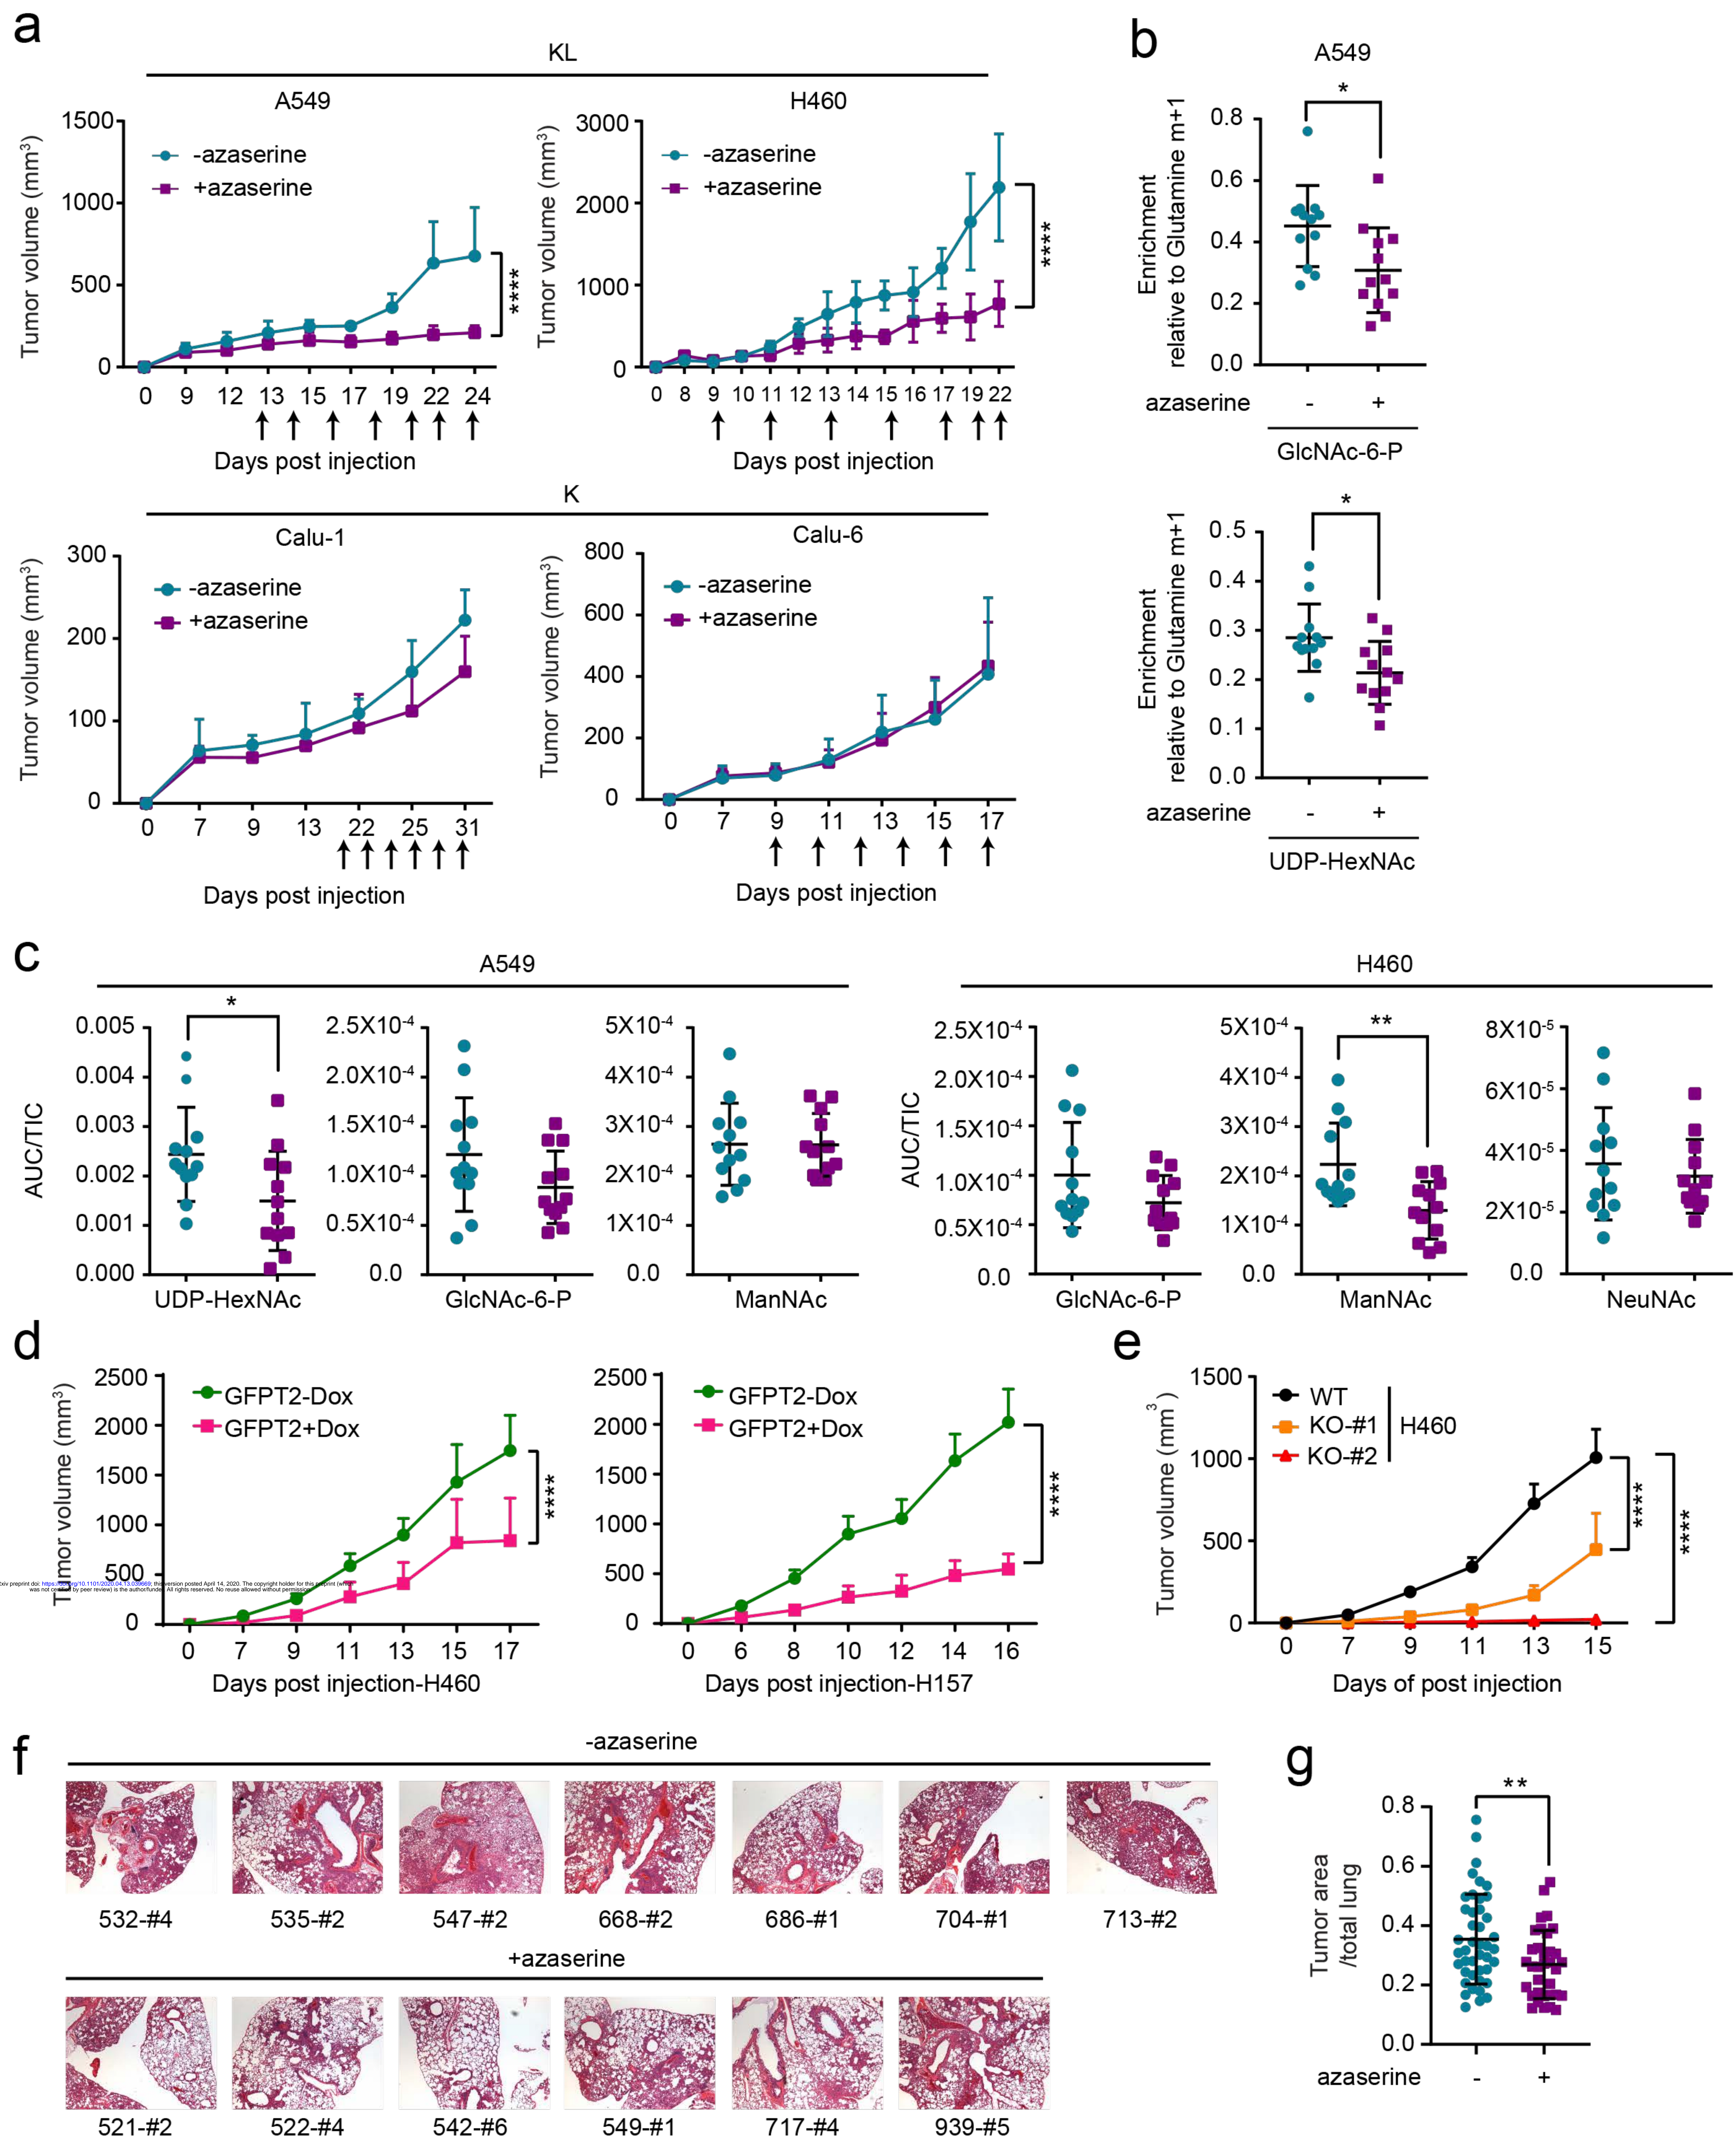



# Supplementary Figure 1

a

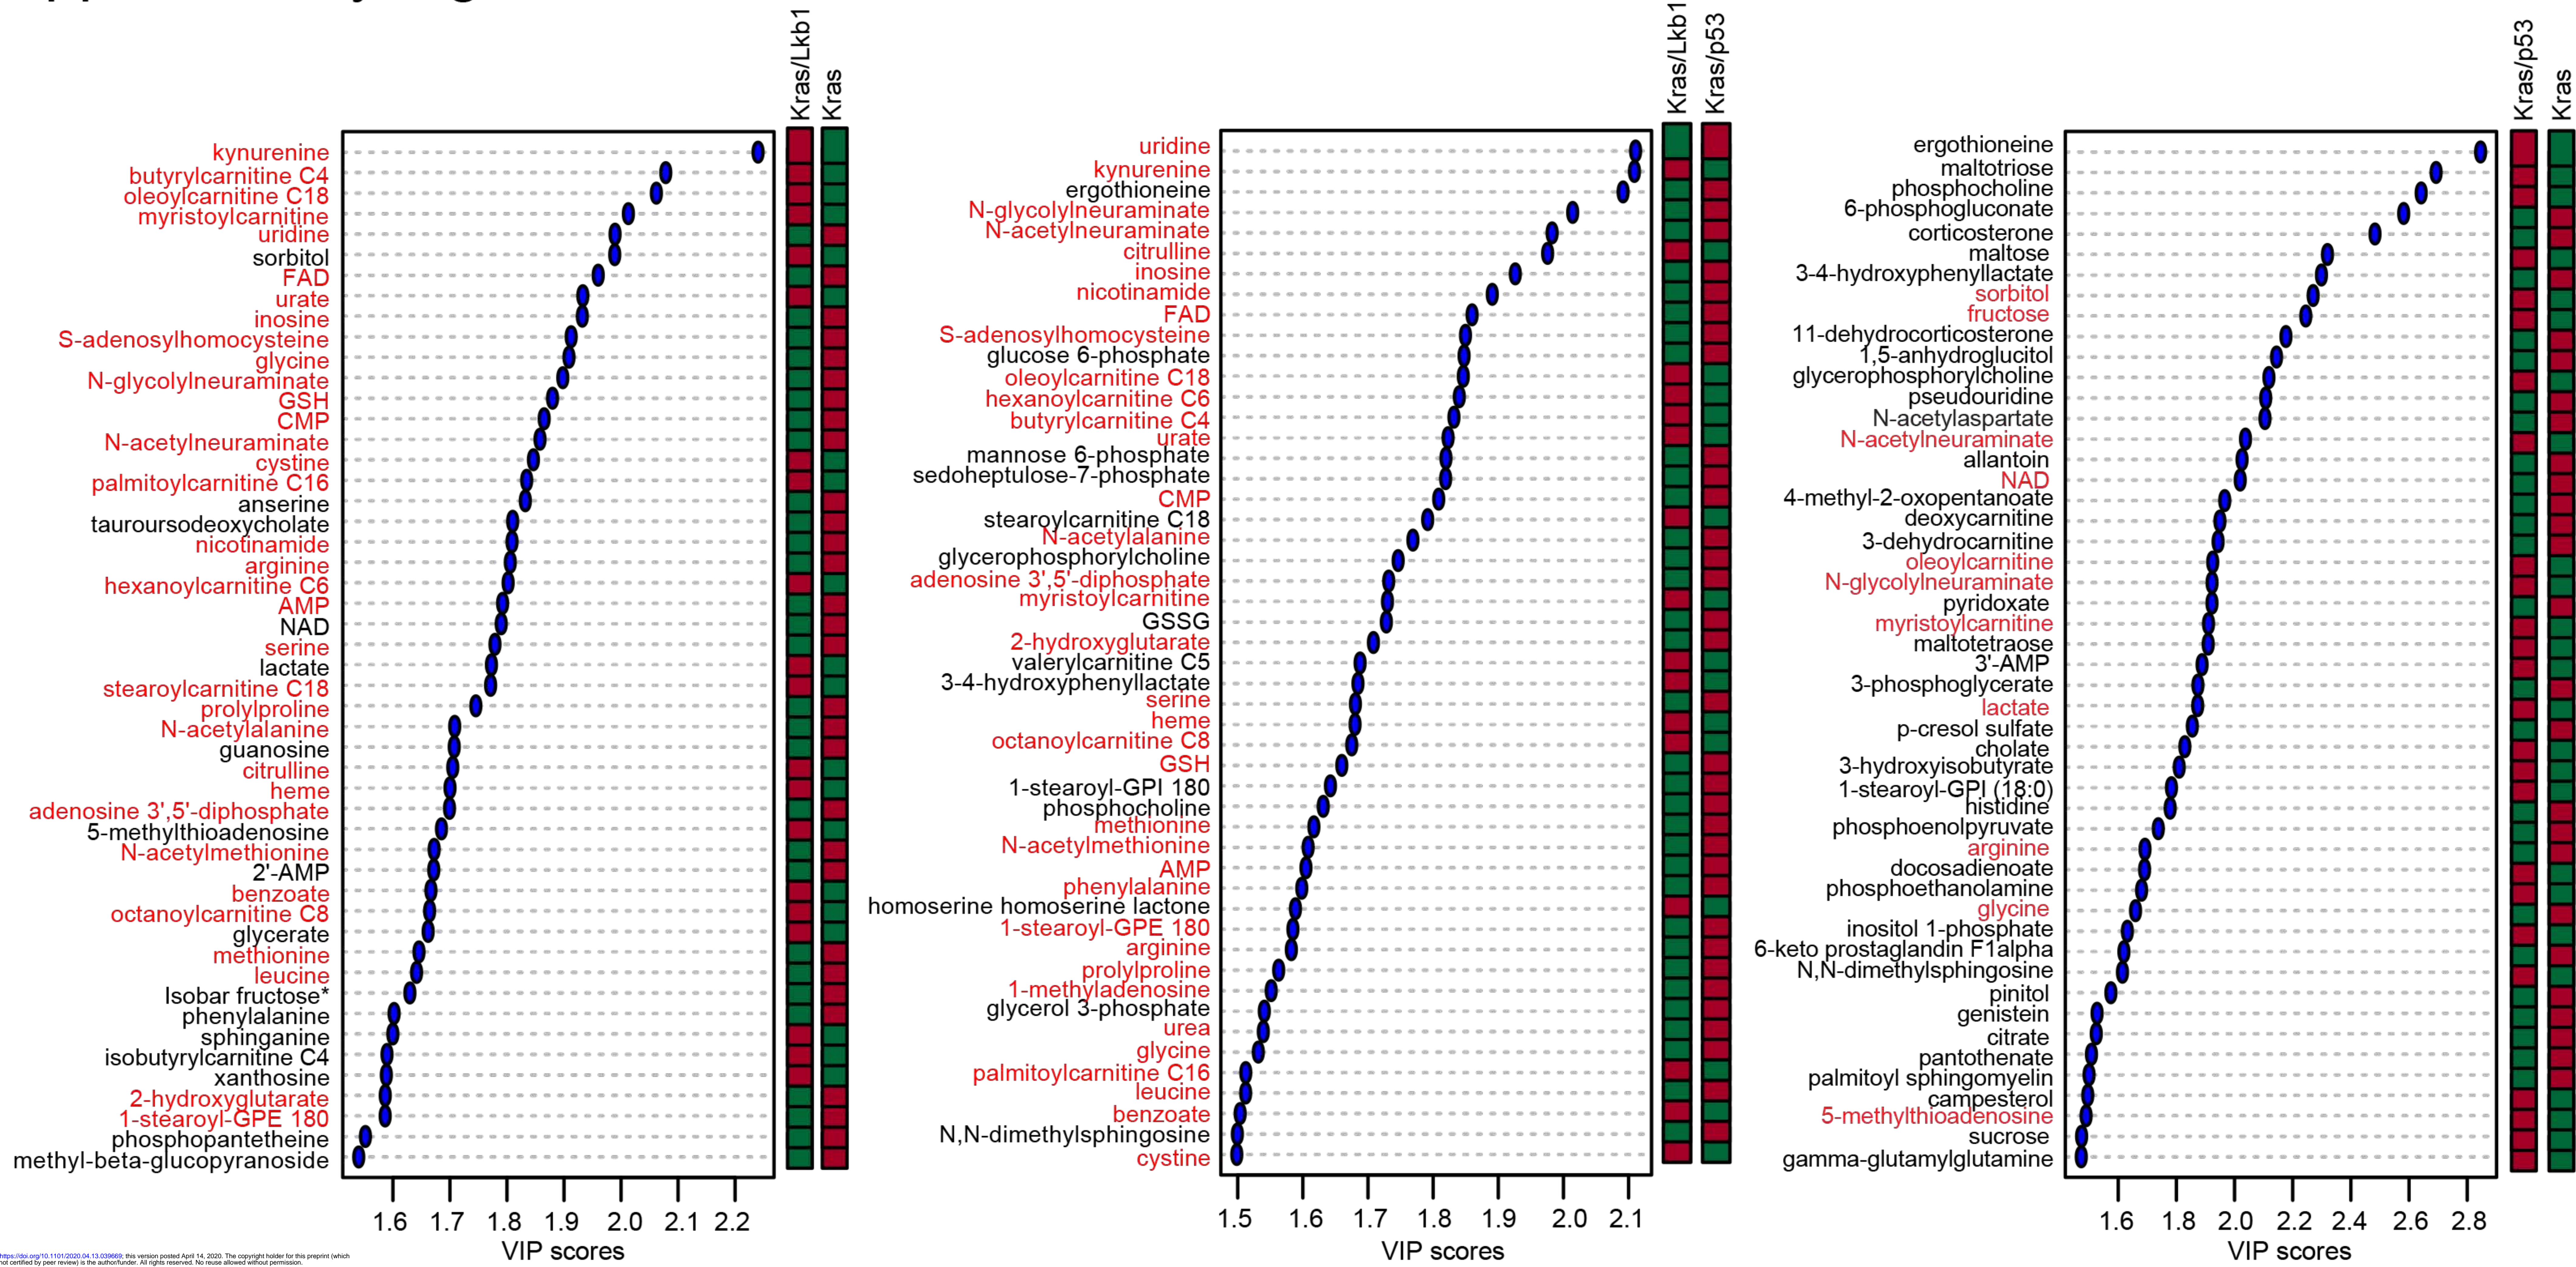

bioRxiv preprint doi: <https://doi.org/10.1101/2020.04.13.028990>; this version posted April 14, 2020. The copyright holder for this preprint (which was not certified by peer review) is the author/funder. All rights reserved. No reuse allowed without permission.

b

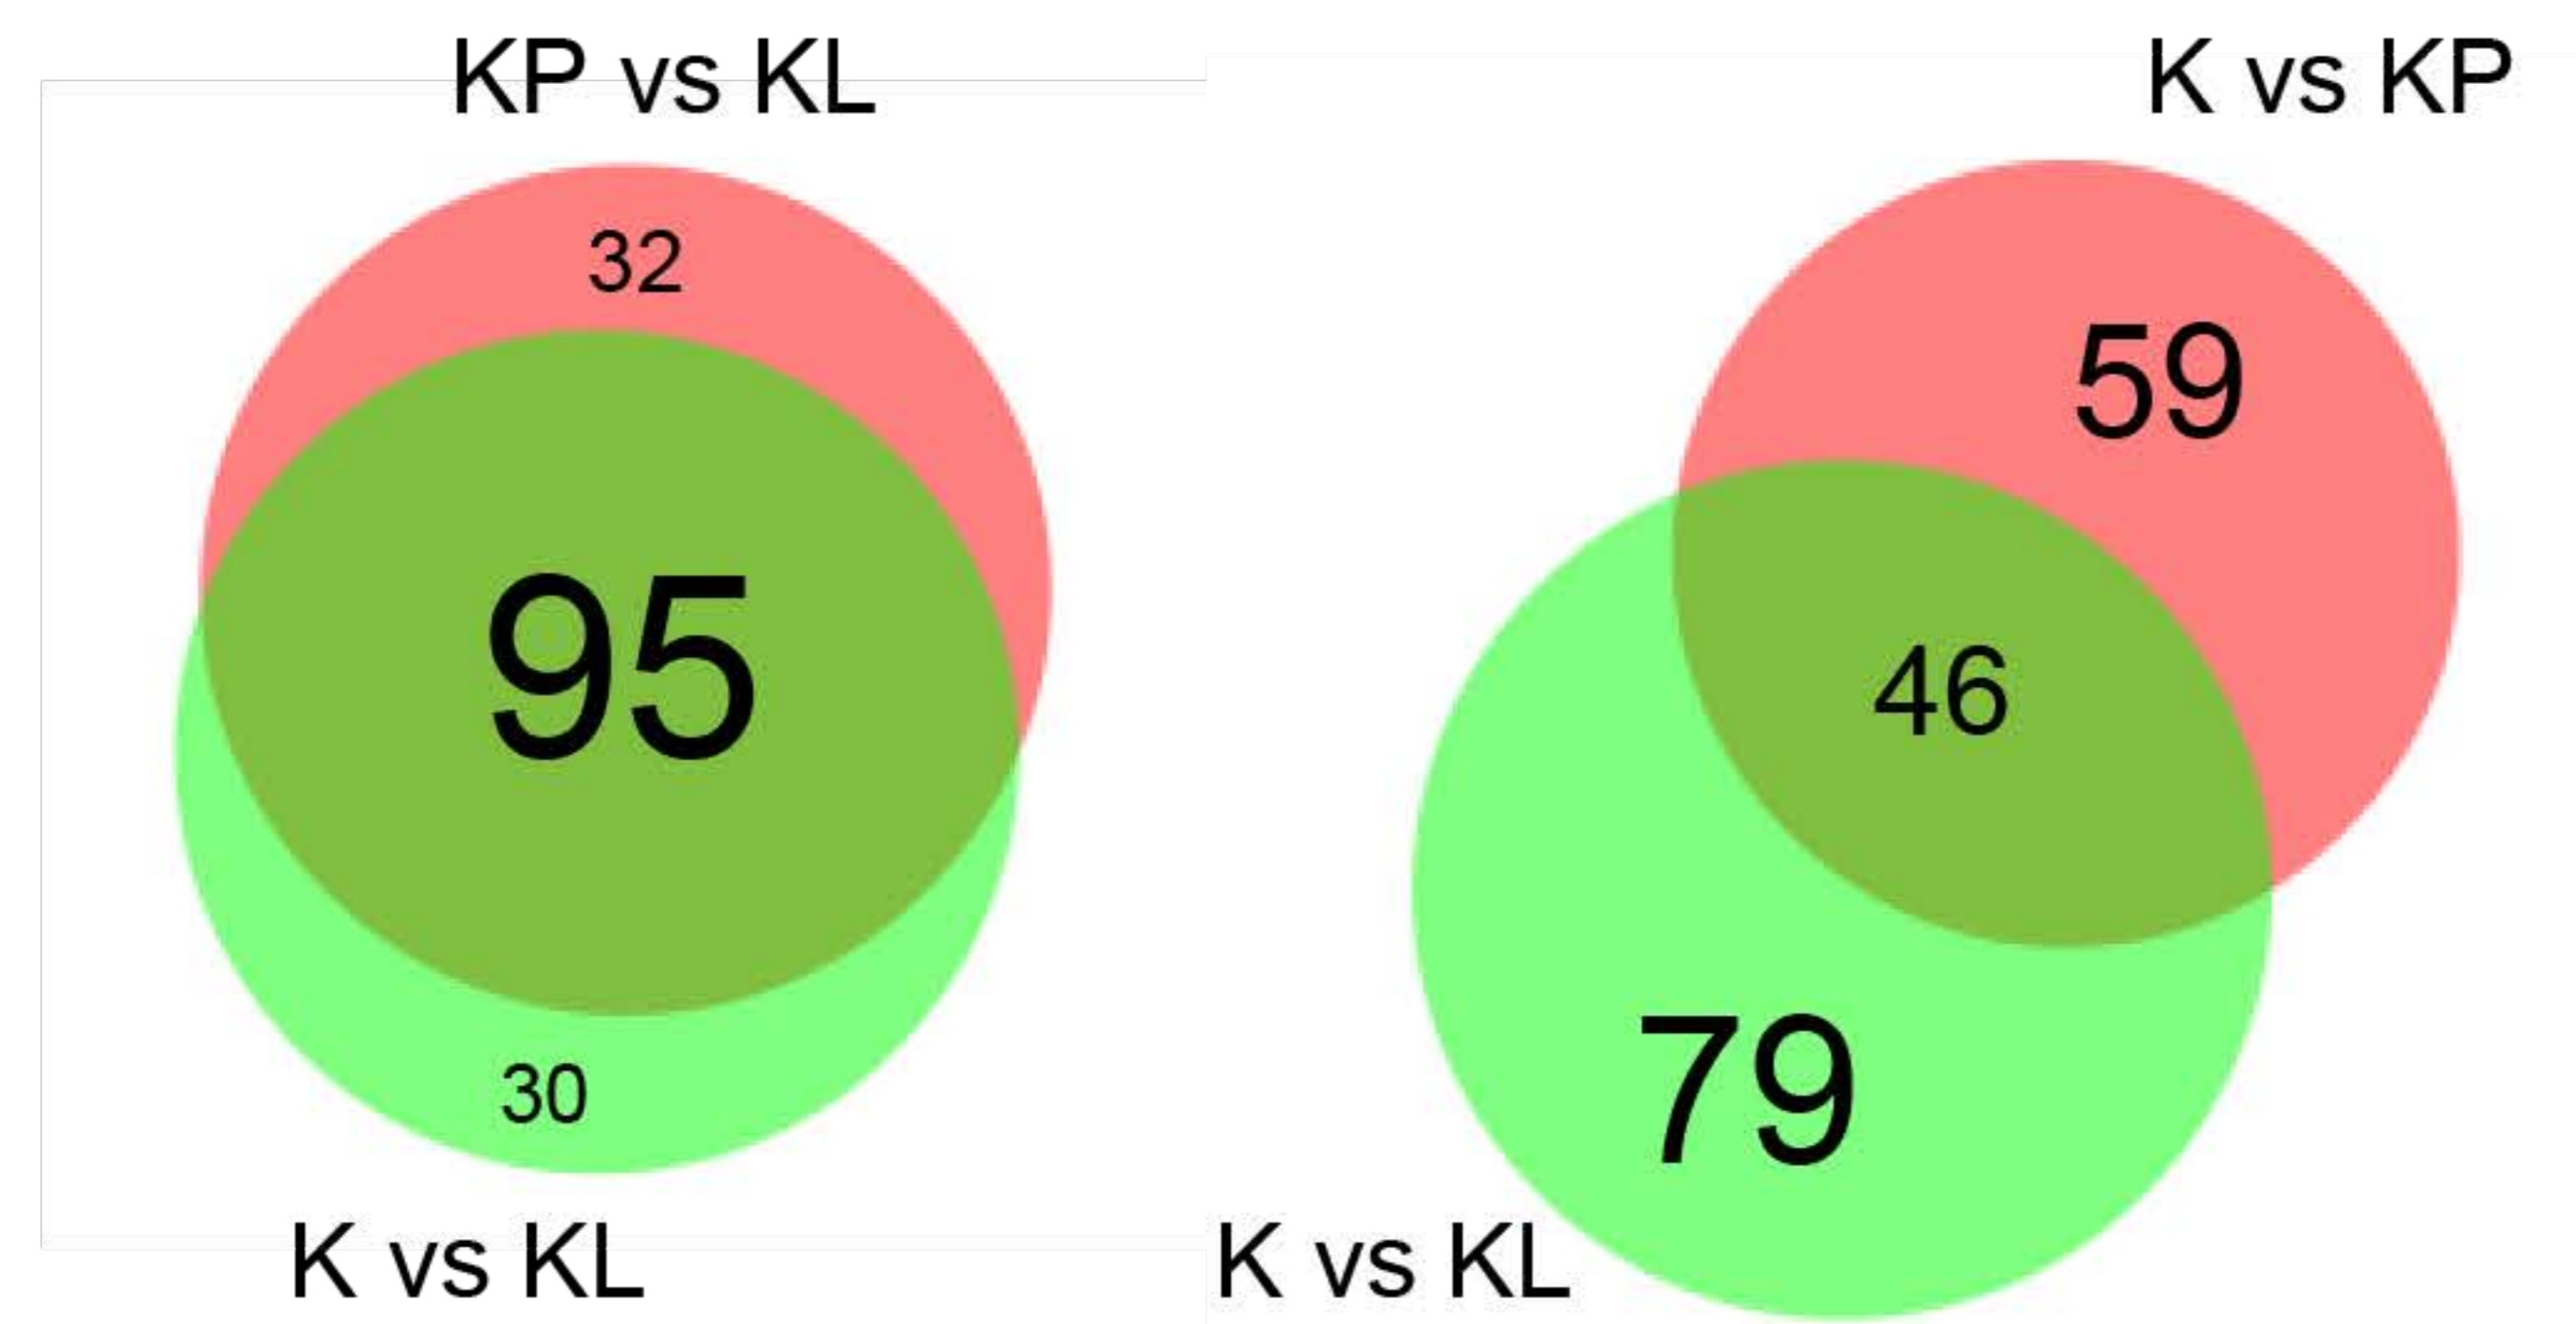

c

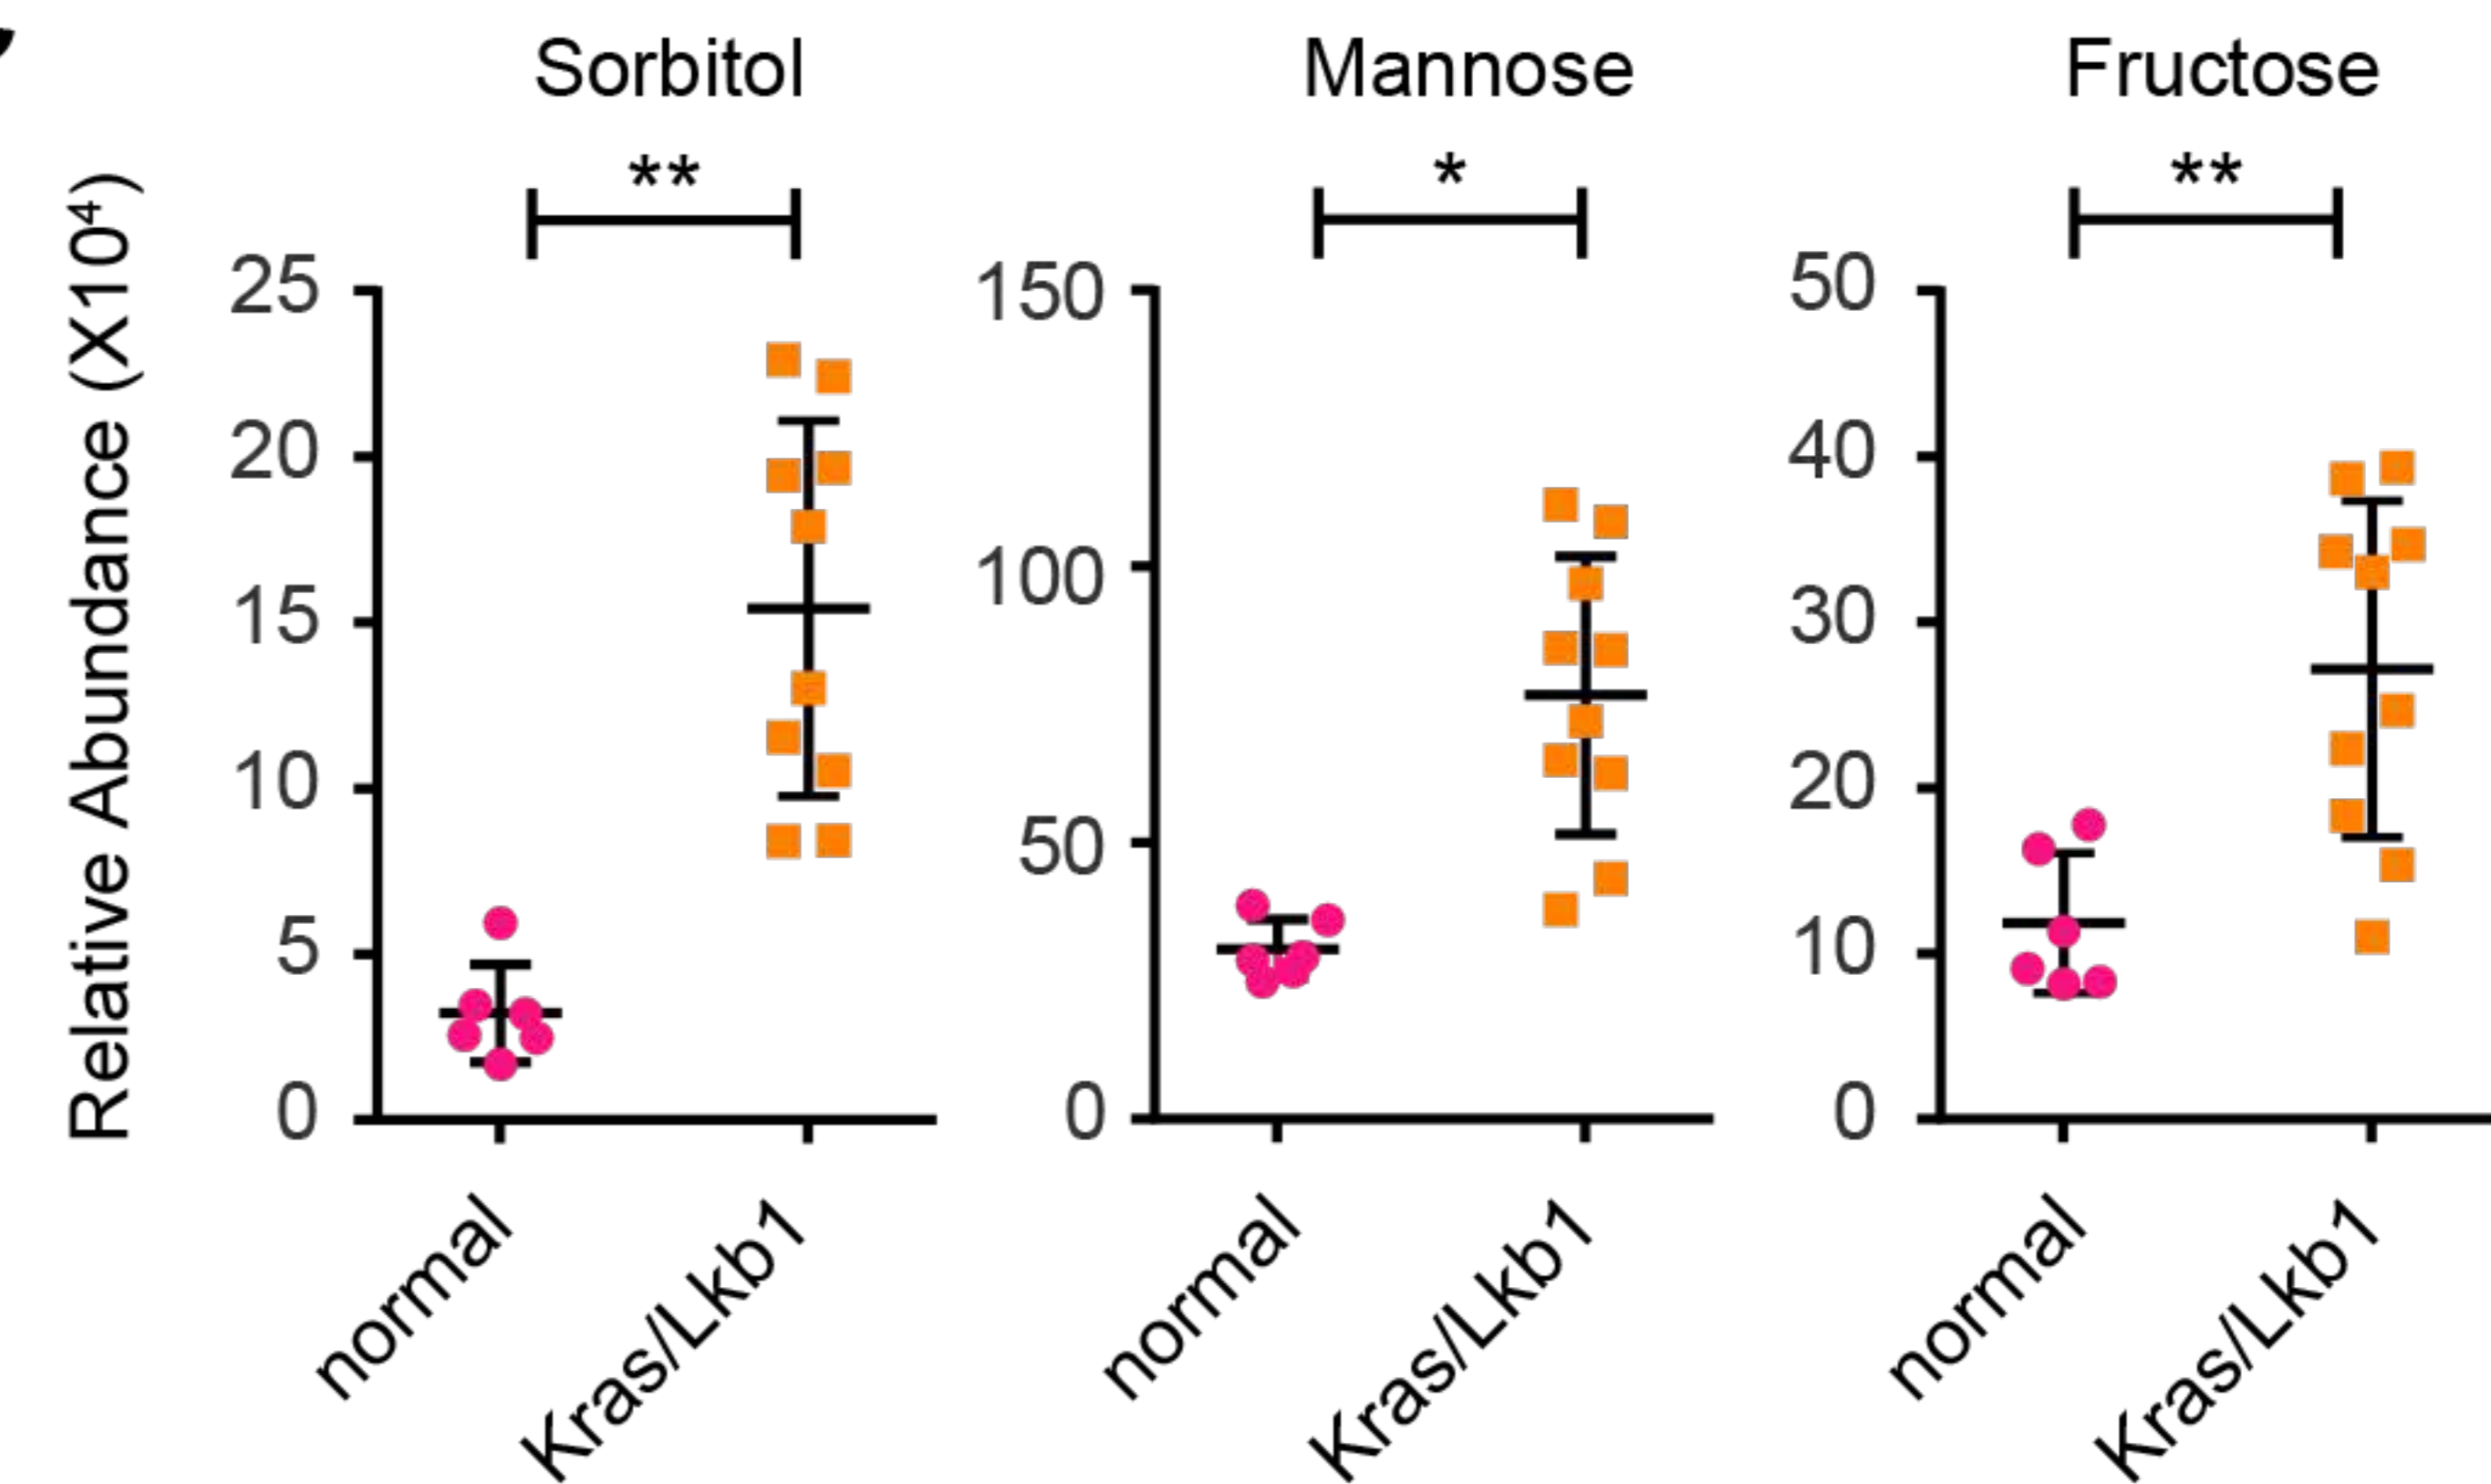



# Supplementary Figure 2

**a**

KEGG\_Aminosugar and nucleotide sugar metabolism

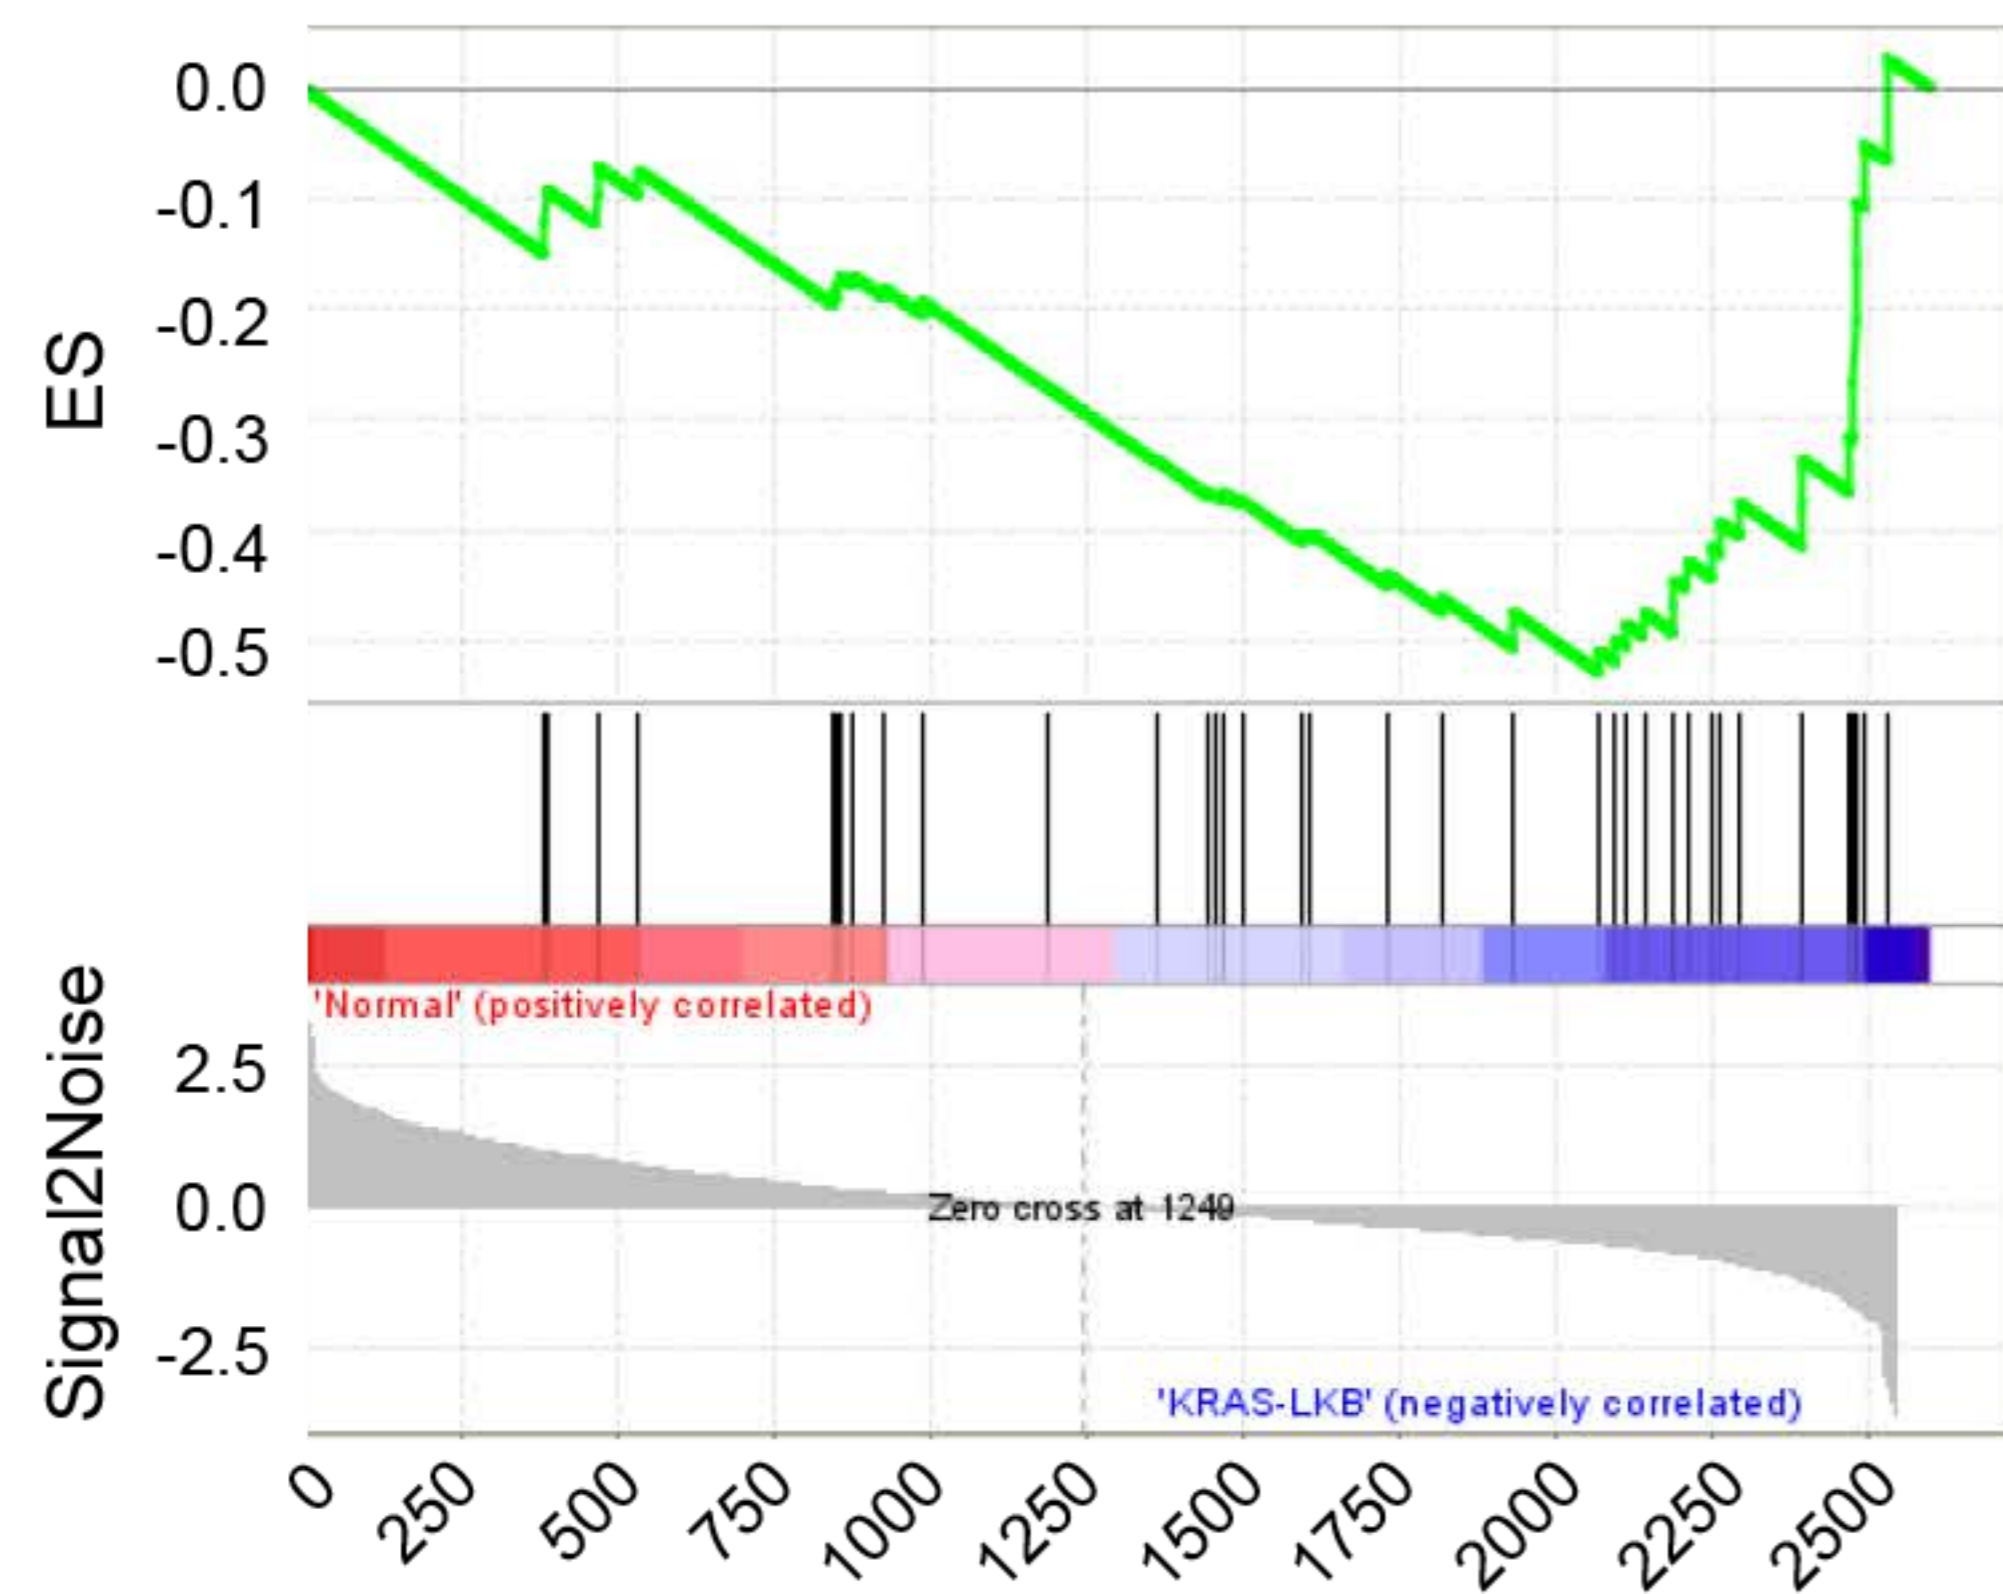

Rank in ordered dataset  
NES=-1.54, Nom. p-val=0.0

KEGG\_Fructose and mannose metabolism

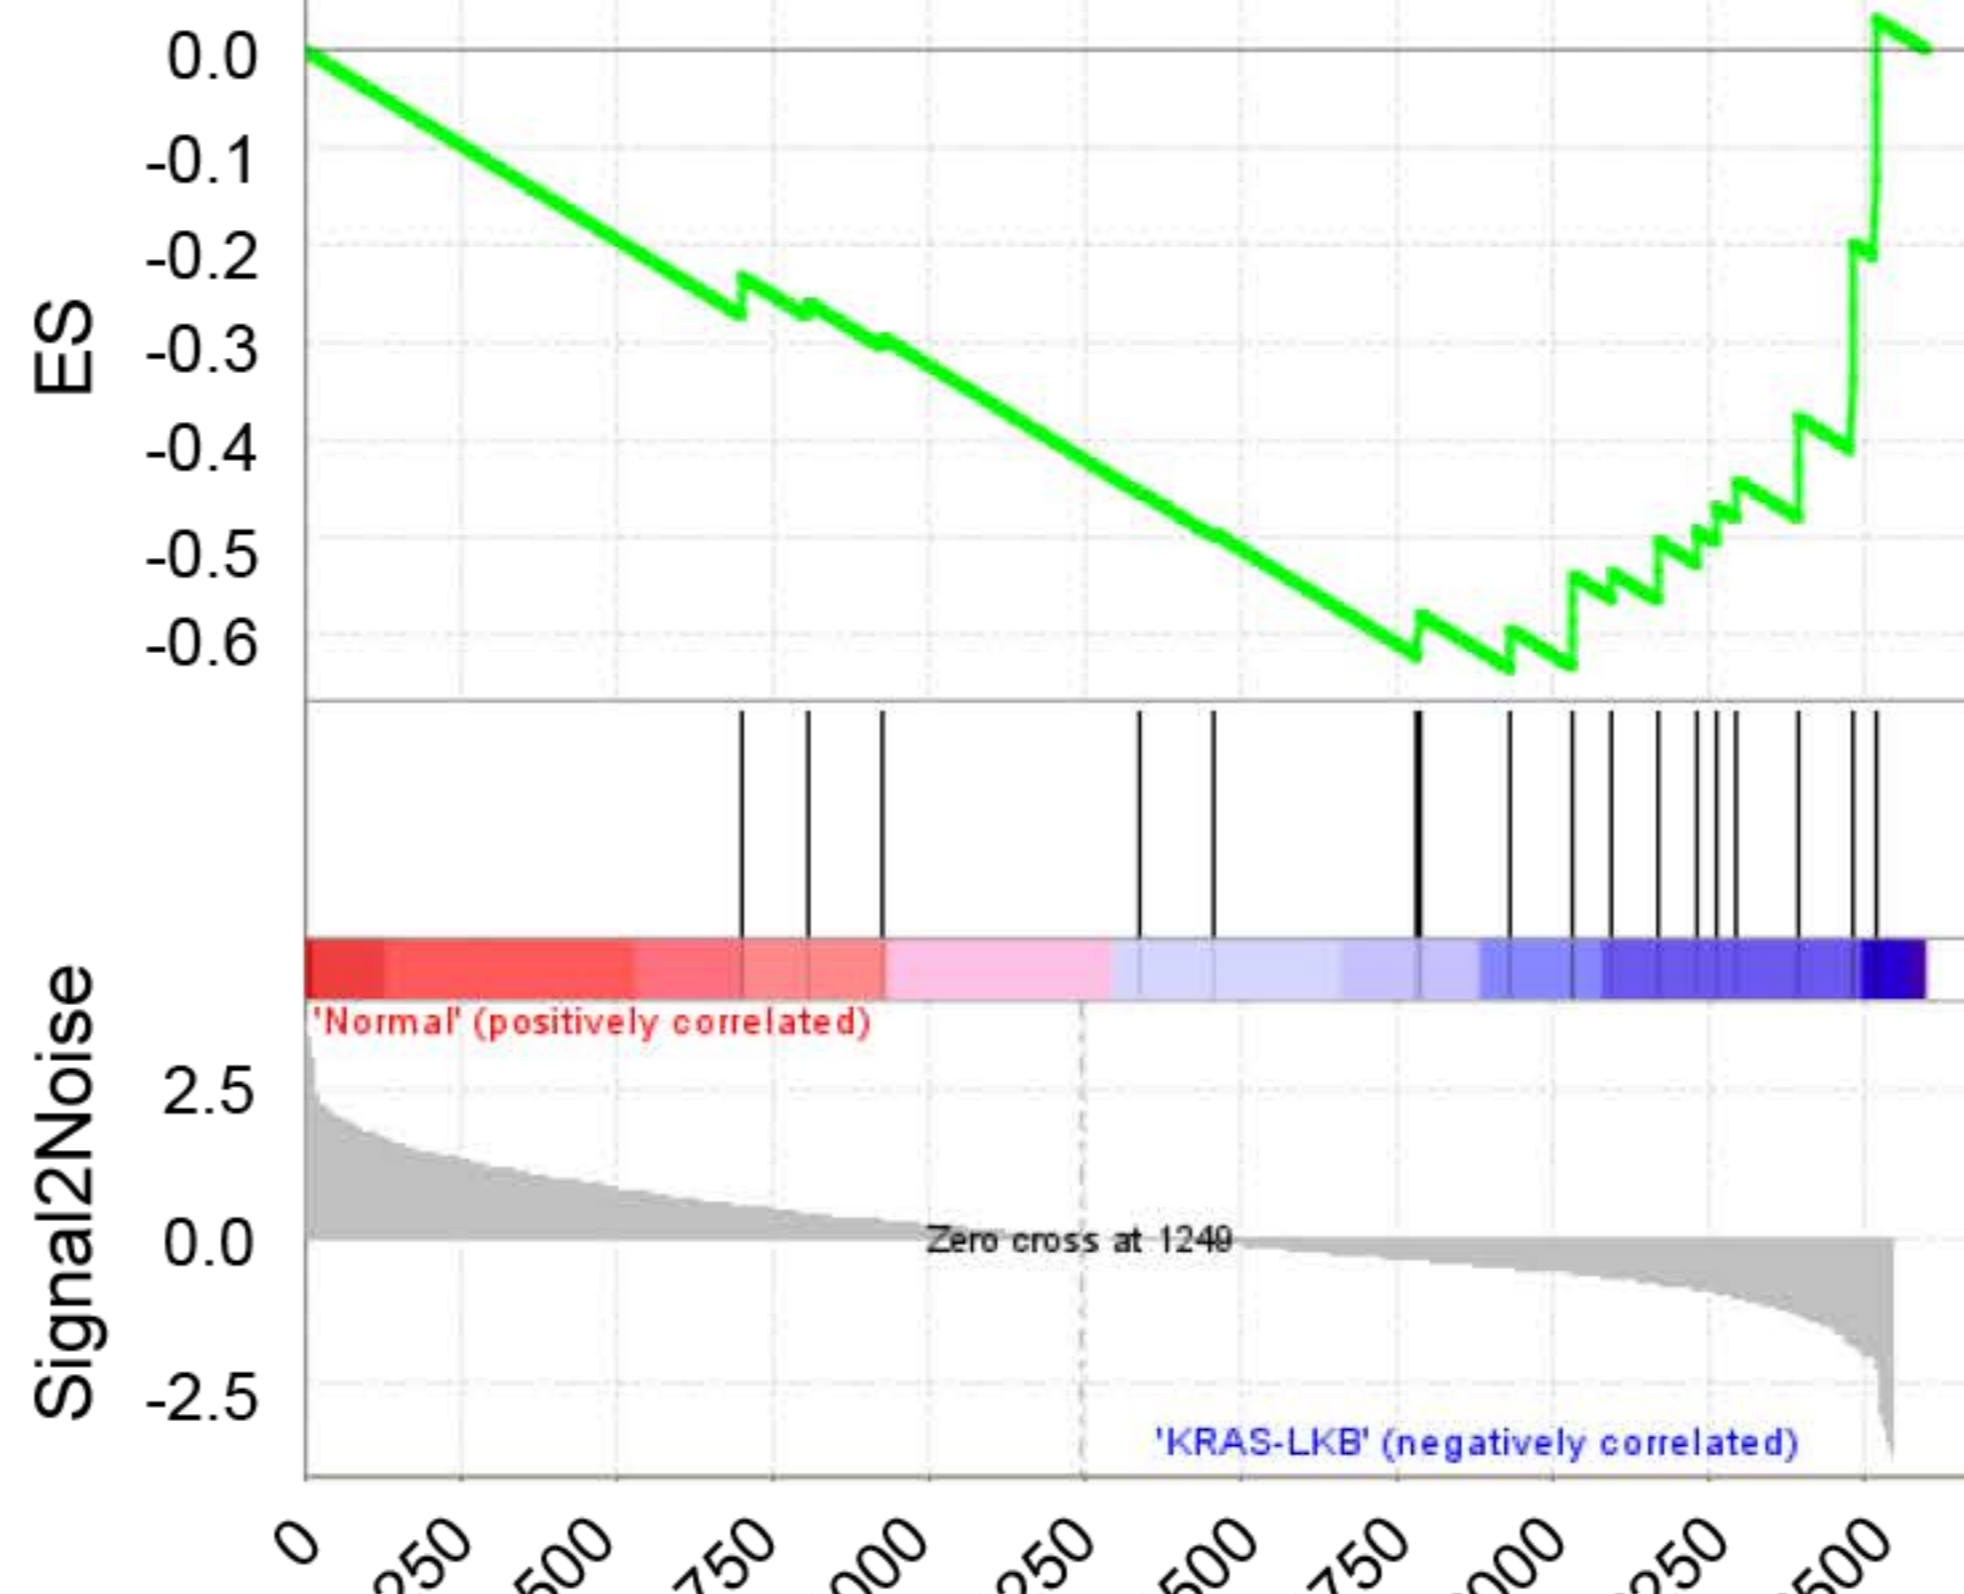

Rank in ordered dataset  
NES=-1.35, Nom. p-val=0.0

KEGG\_Oxidative Phosphorylation

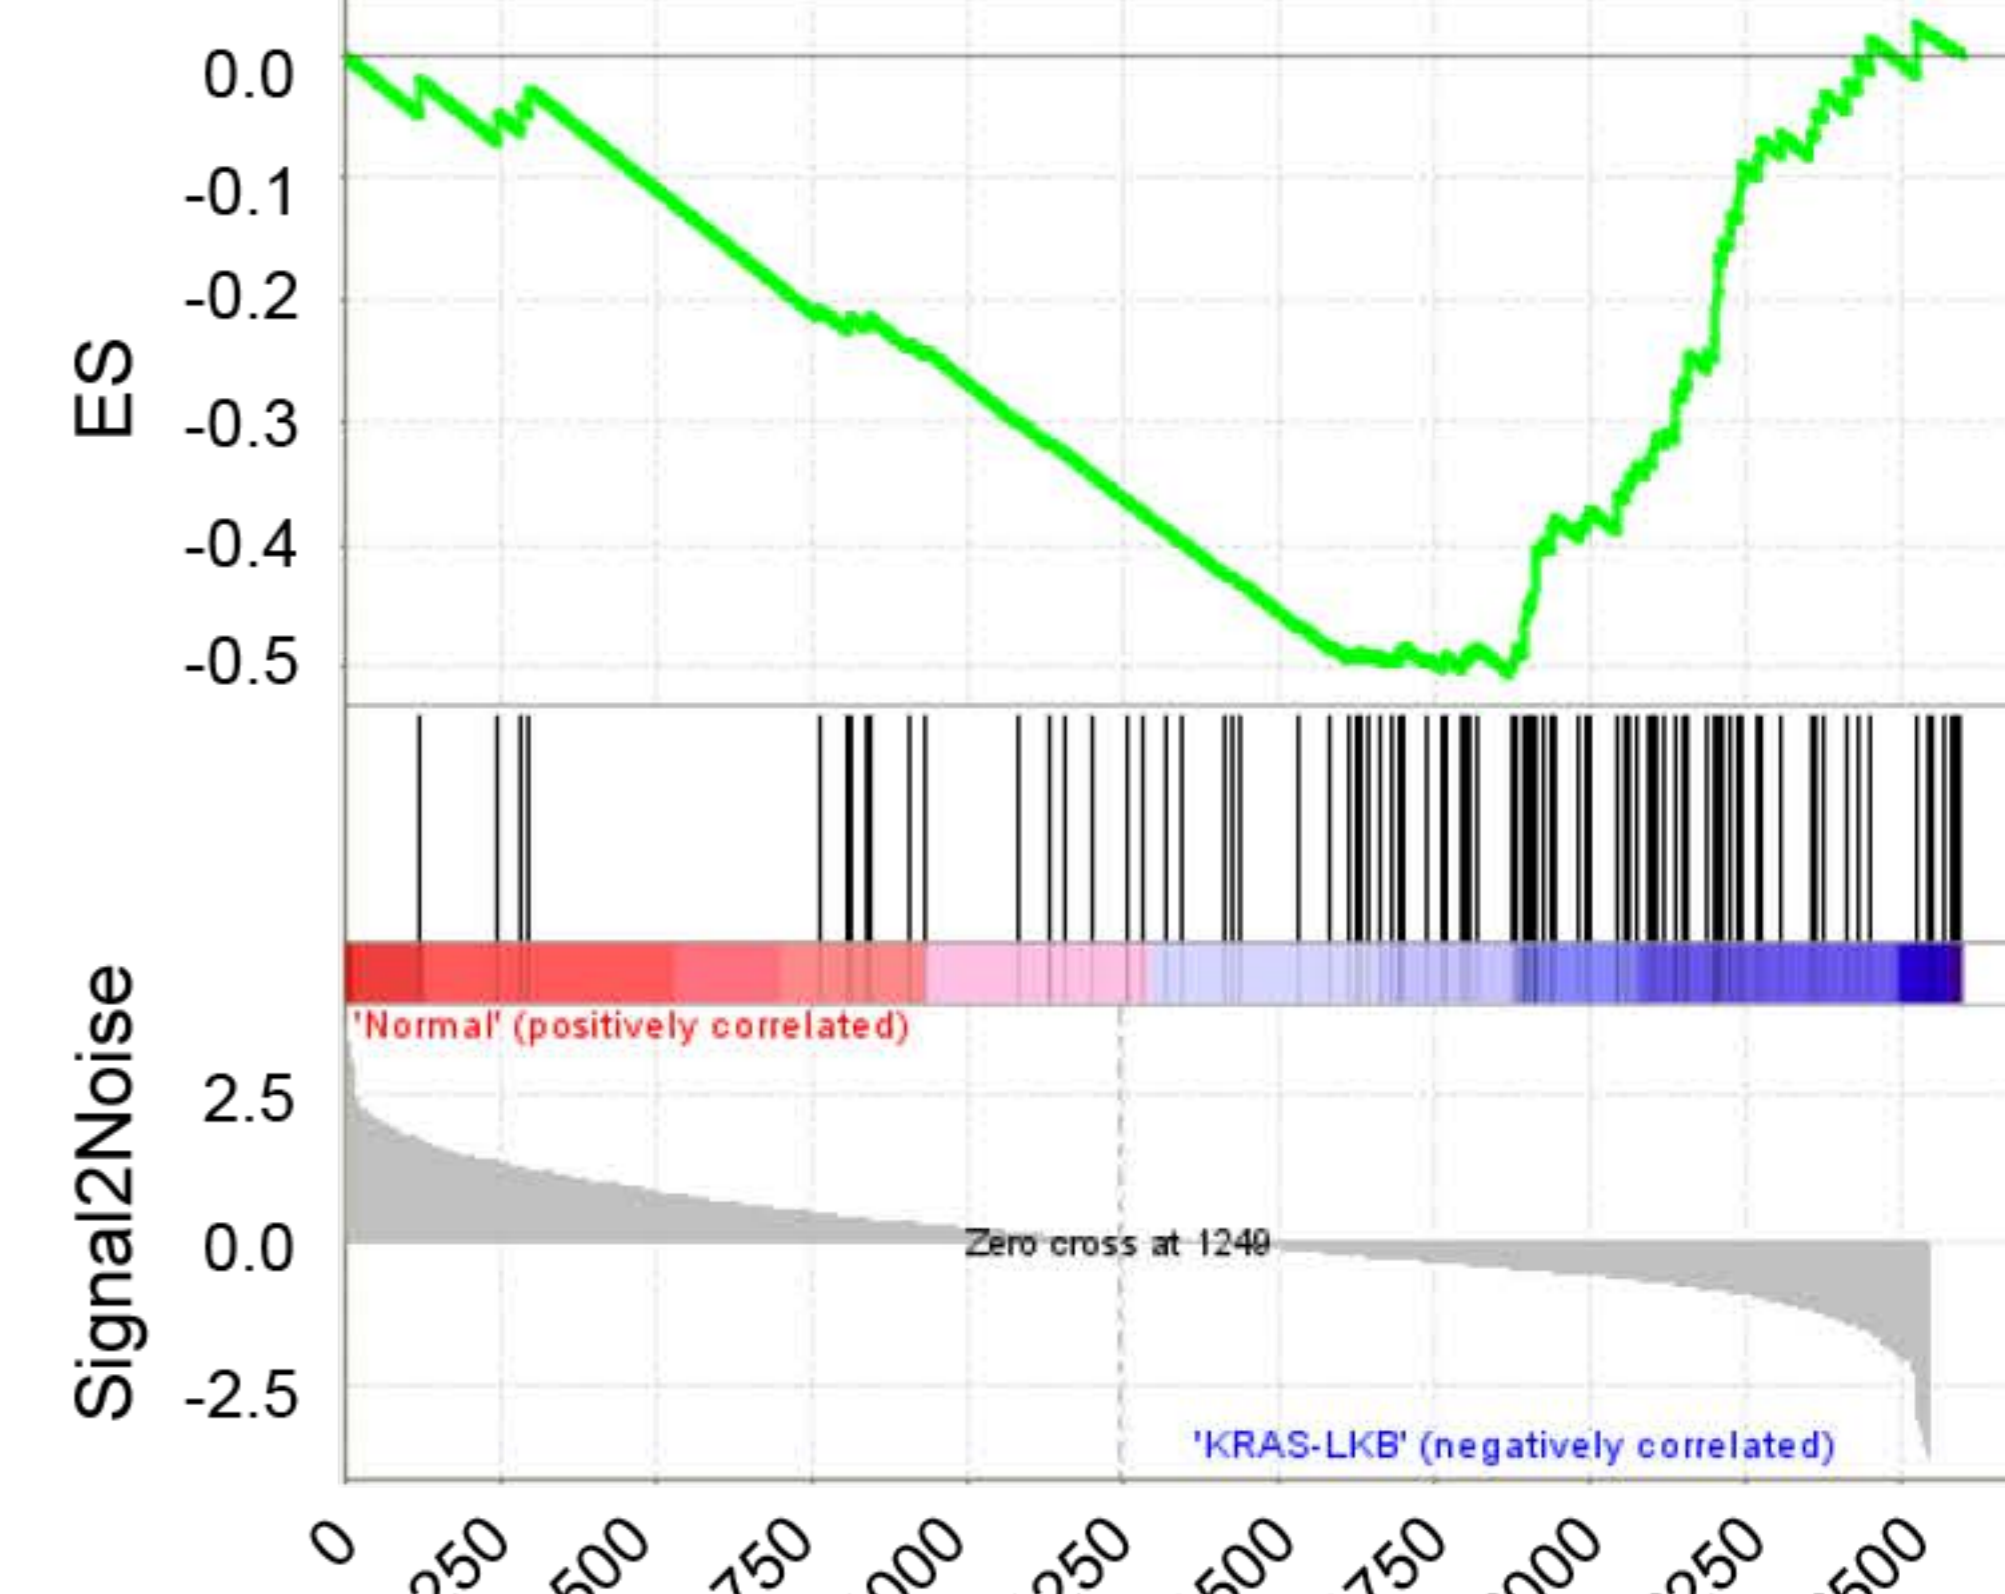

Rank in ordered dataset  
NES=-1.21, Nom. p-val=0.0

**b**

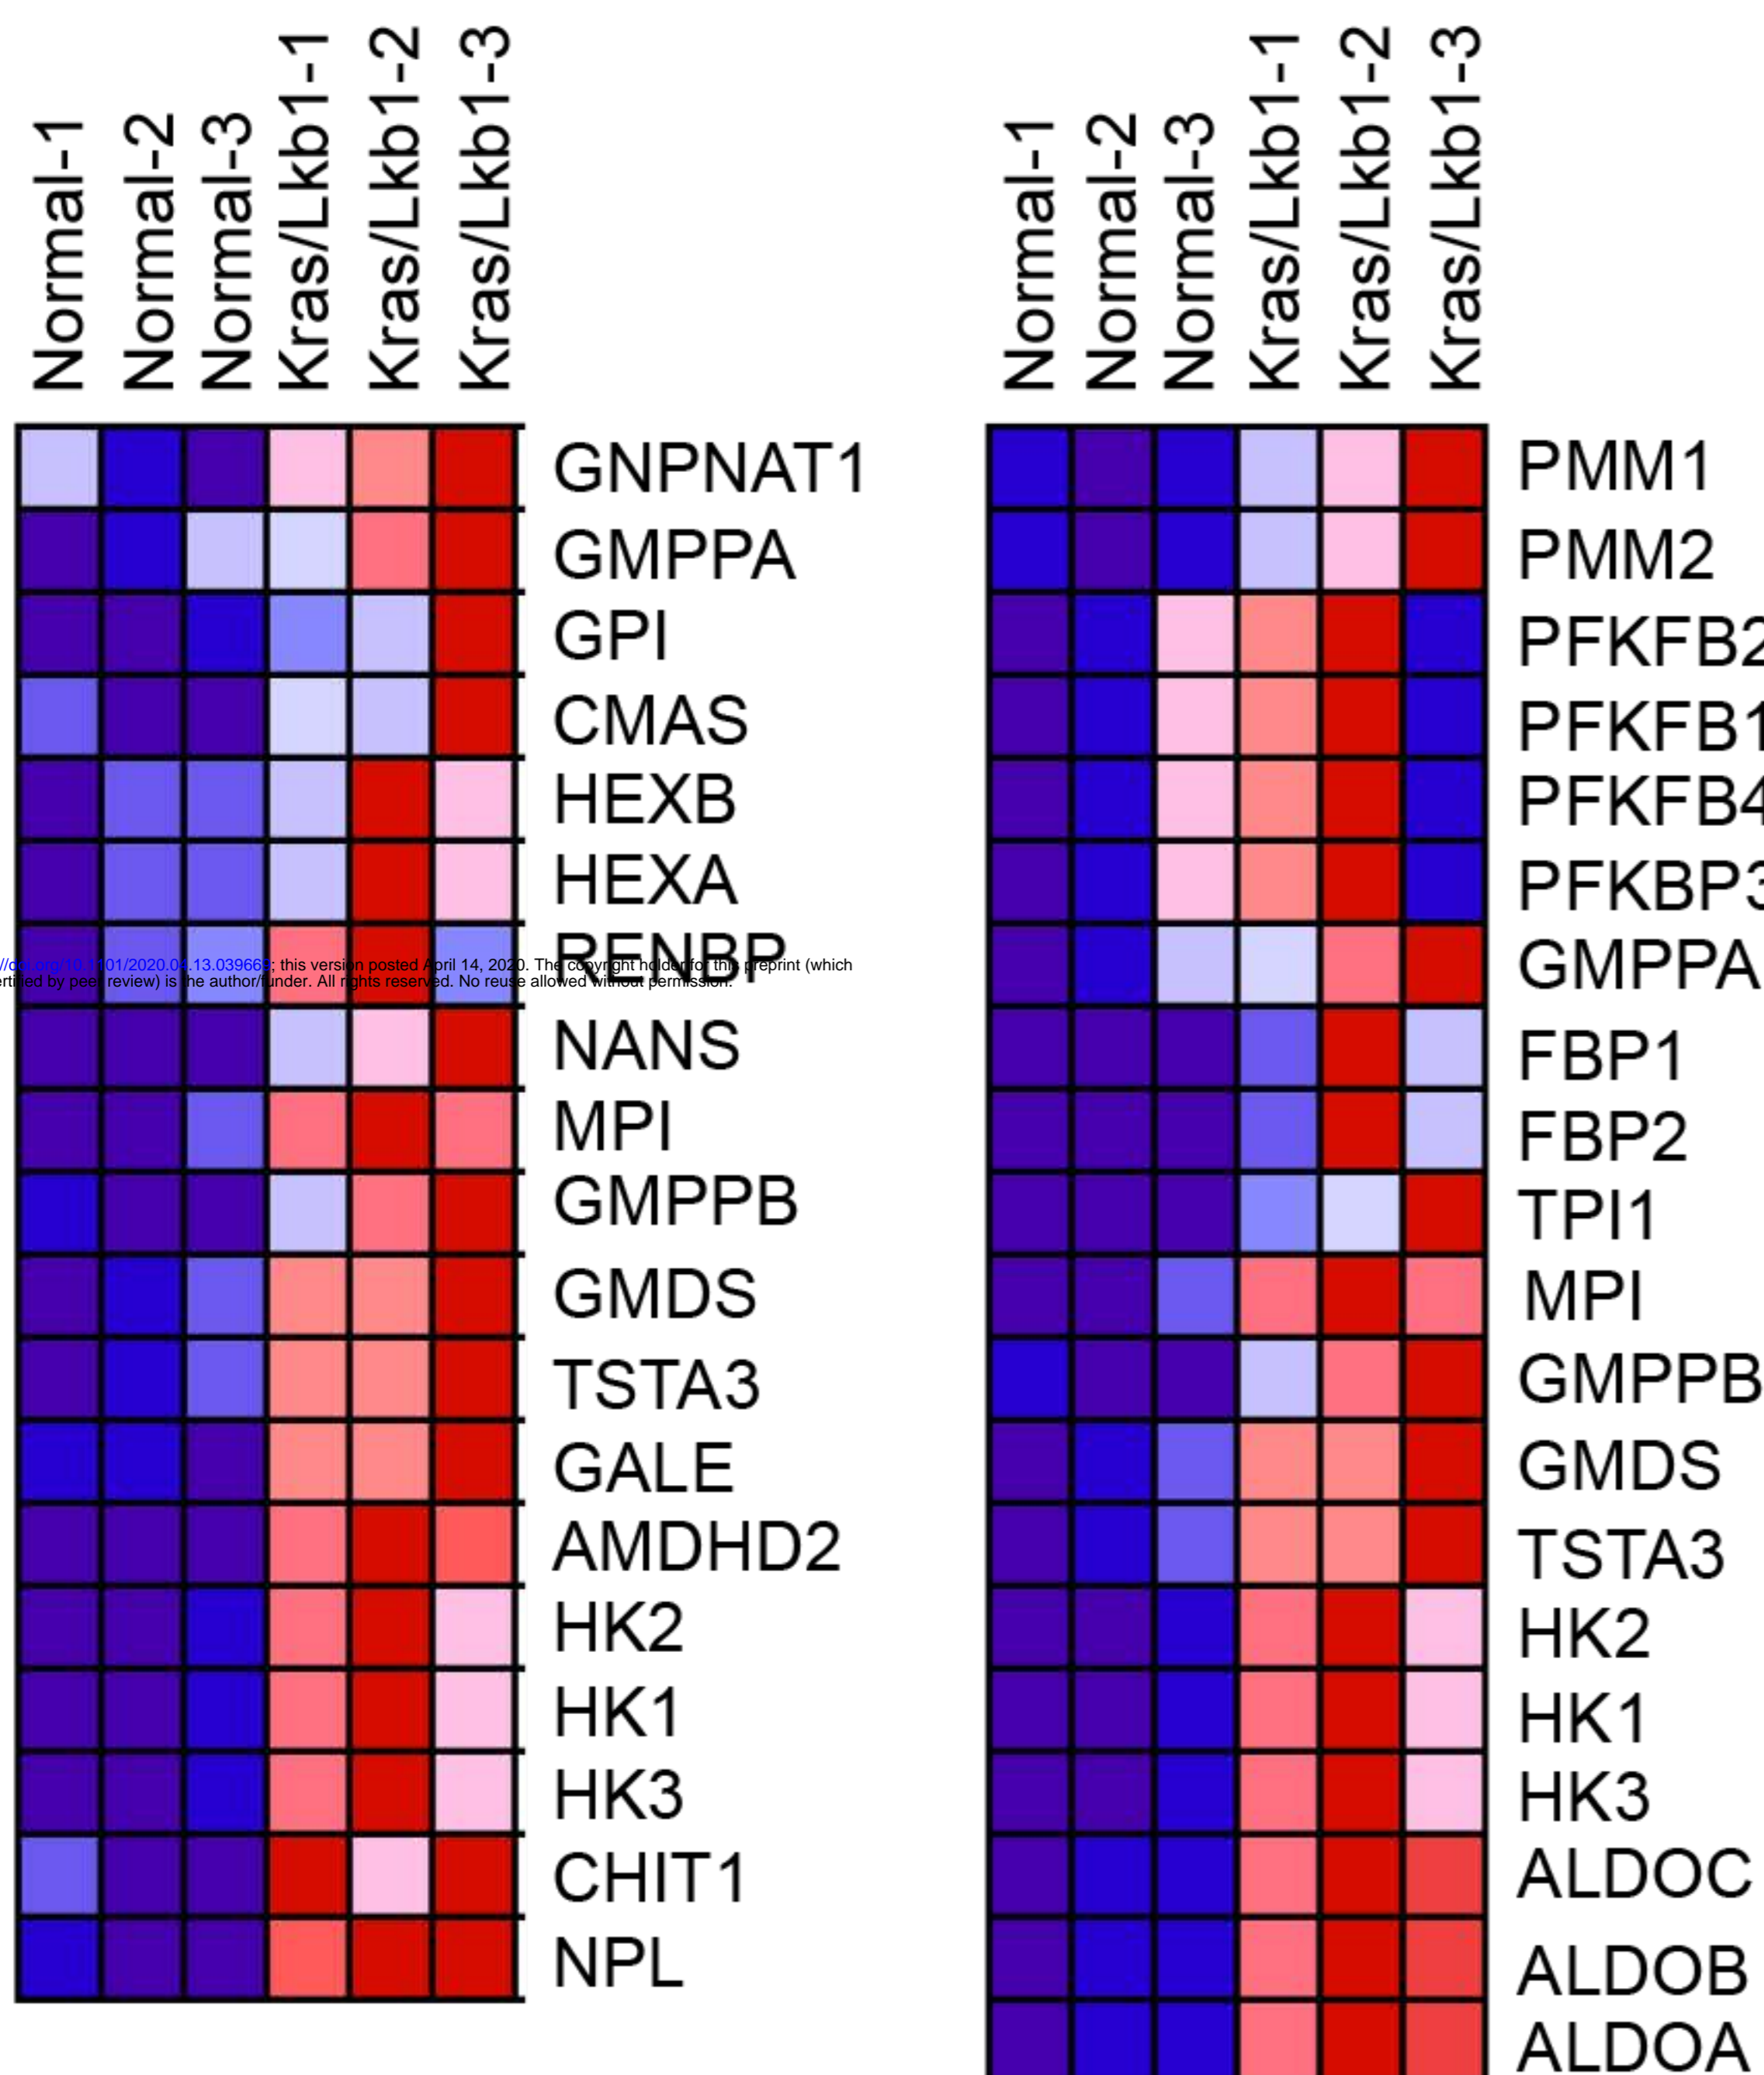

**c**

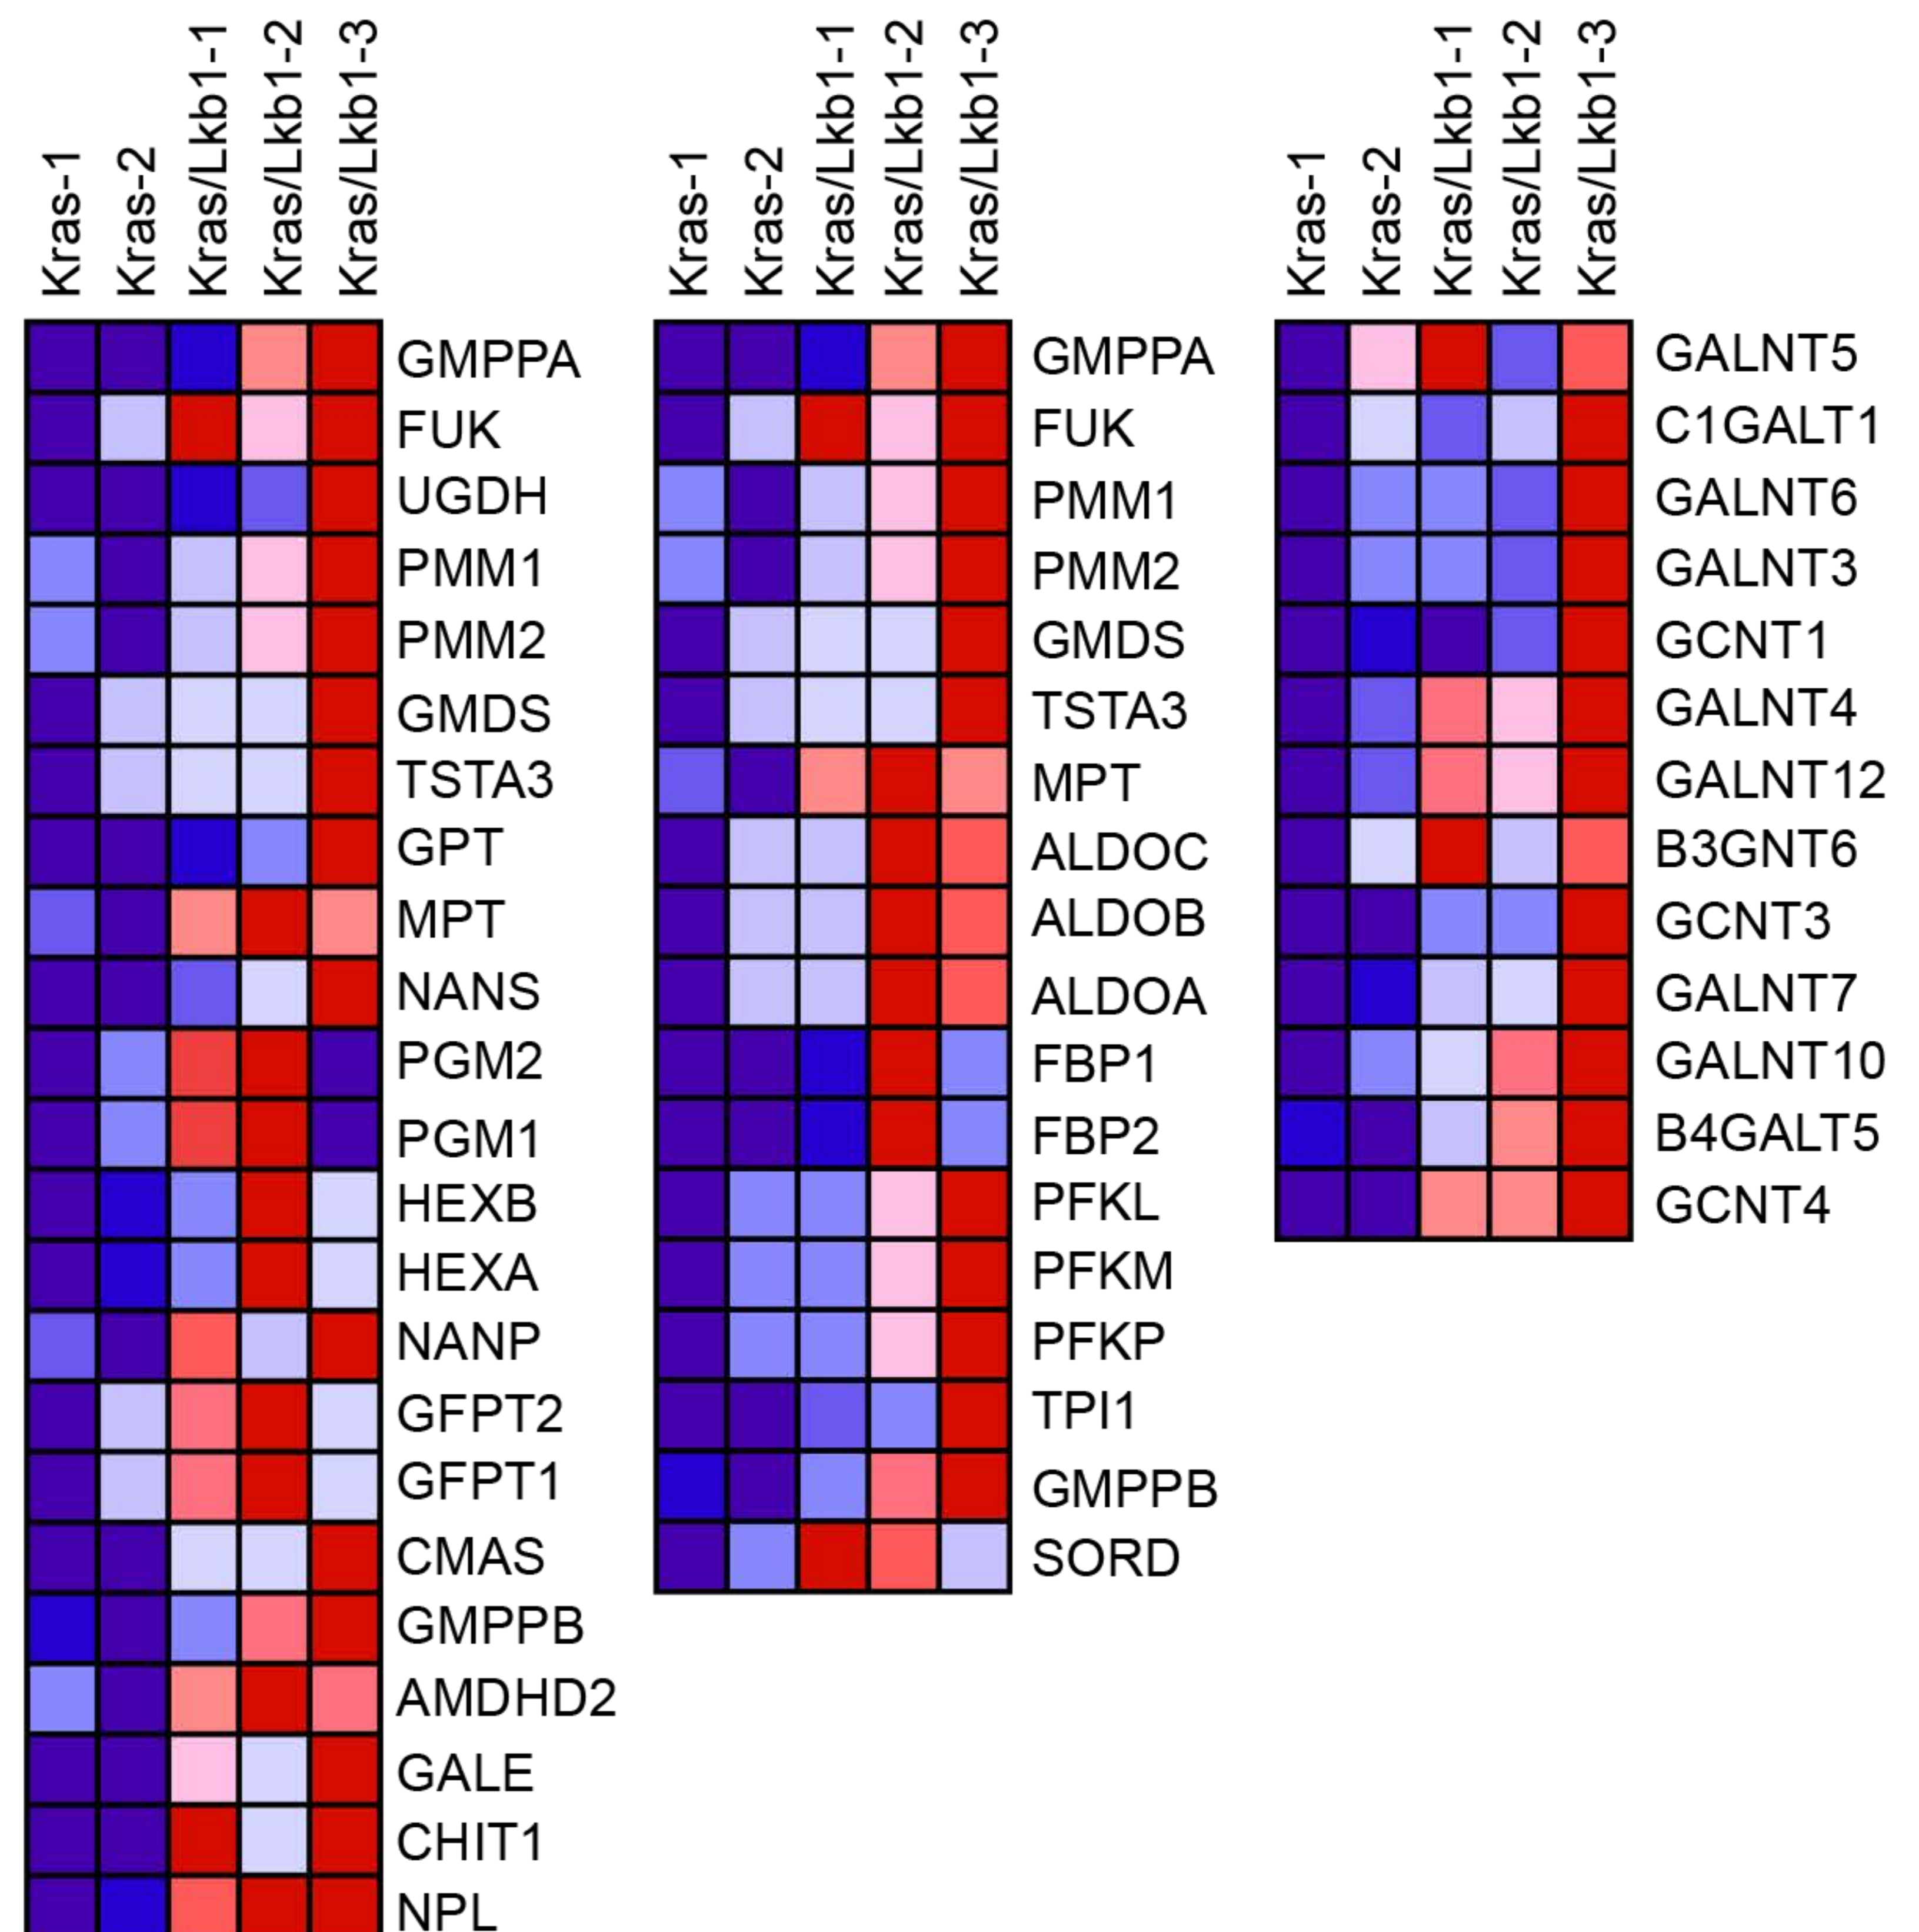





# Supplementary Figure 4

a

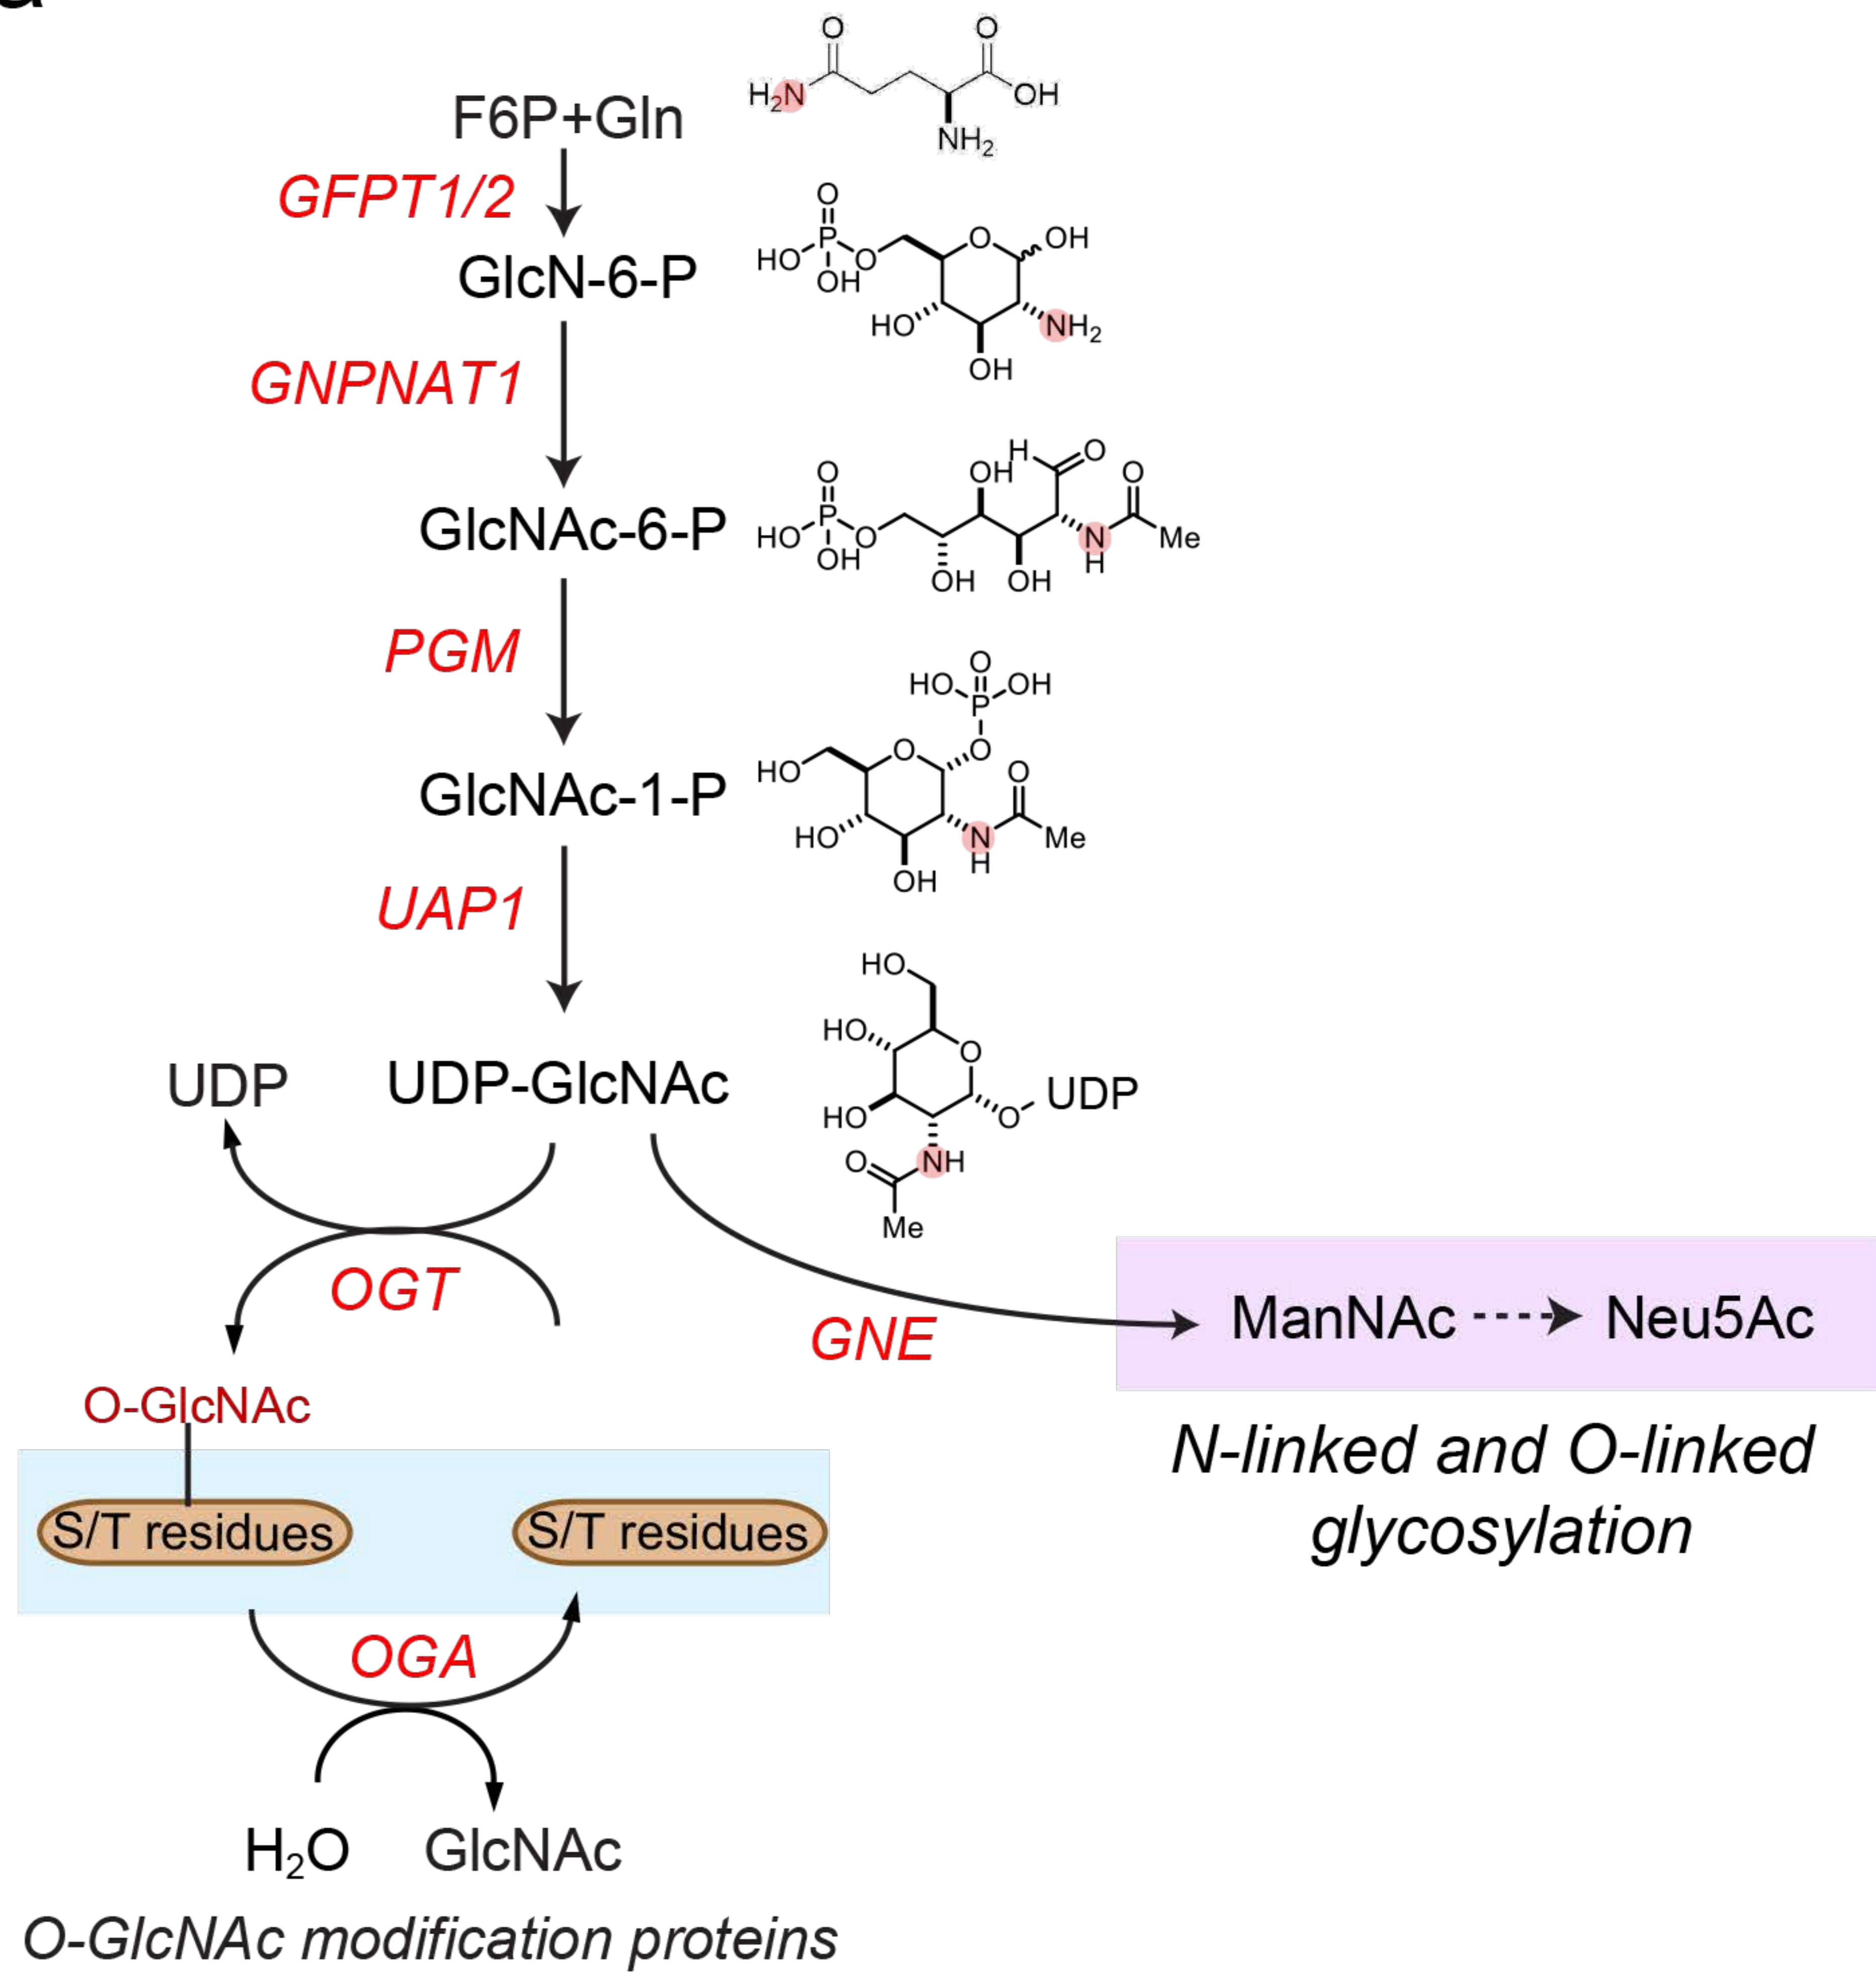

bioRxiv preprint doi: <https://doi.org/10.1101/2020.04.13.039669>; this version posted April 14, 2020. The copyright holder for this preprint (which was not certified by peer review) is the author/funder. All rights reserved. No reuse allowed without permission.

b

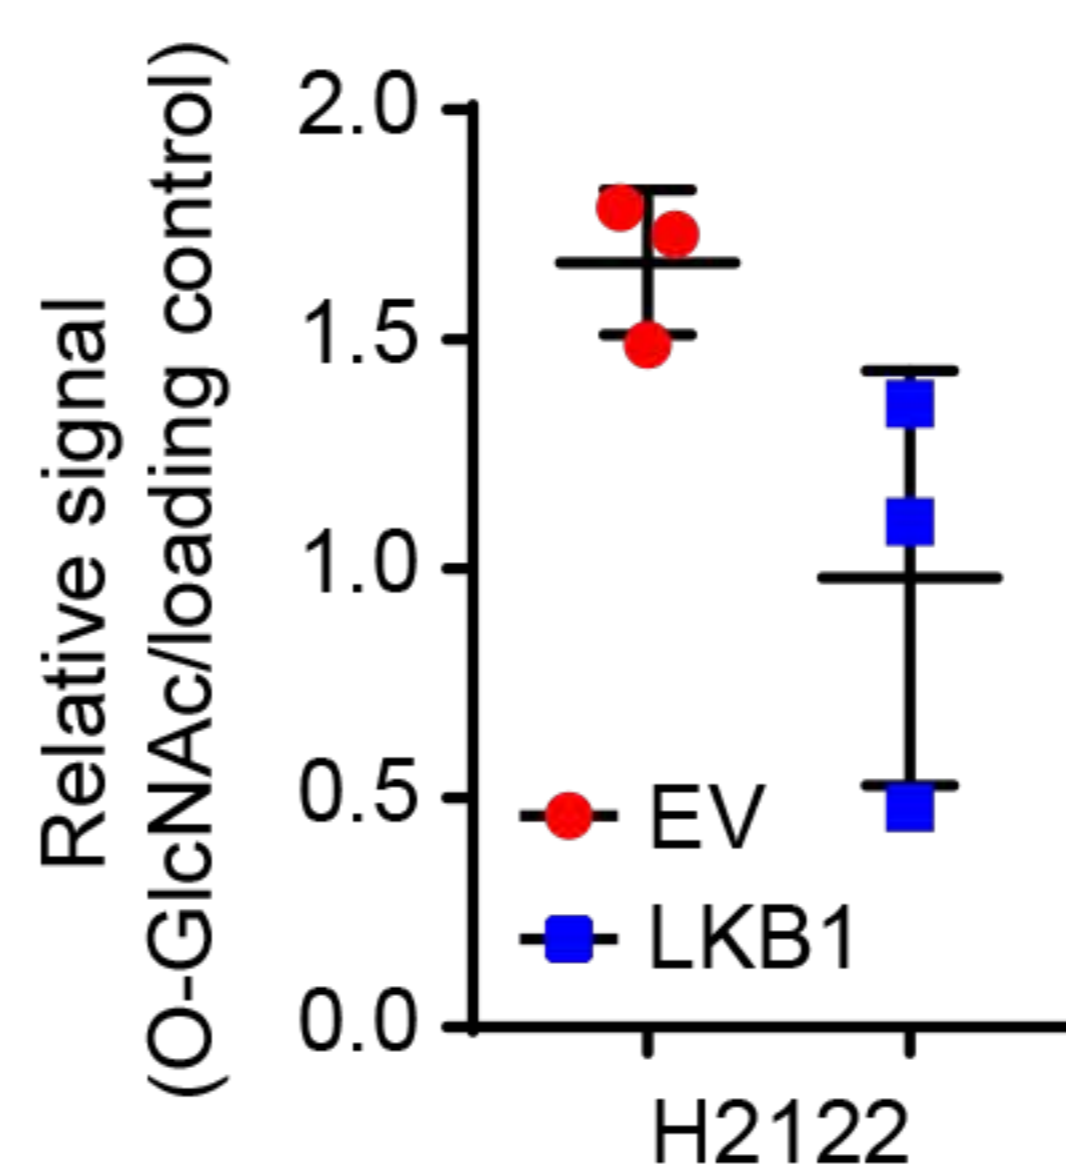



# Supplementary Figure 5

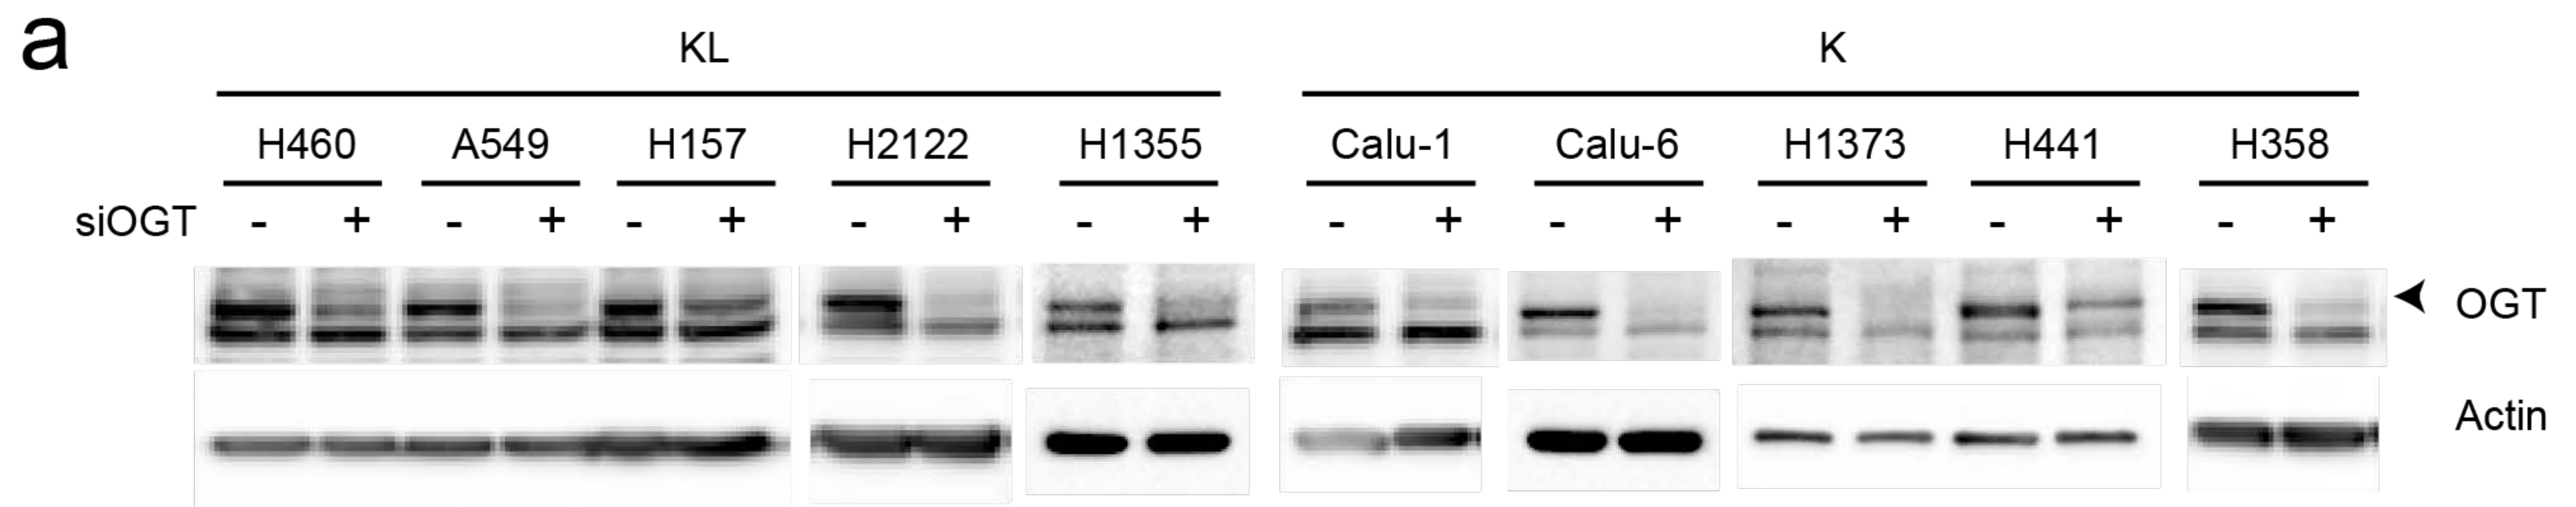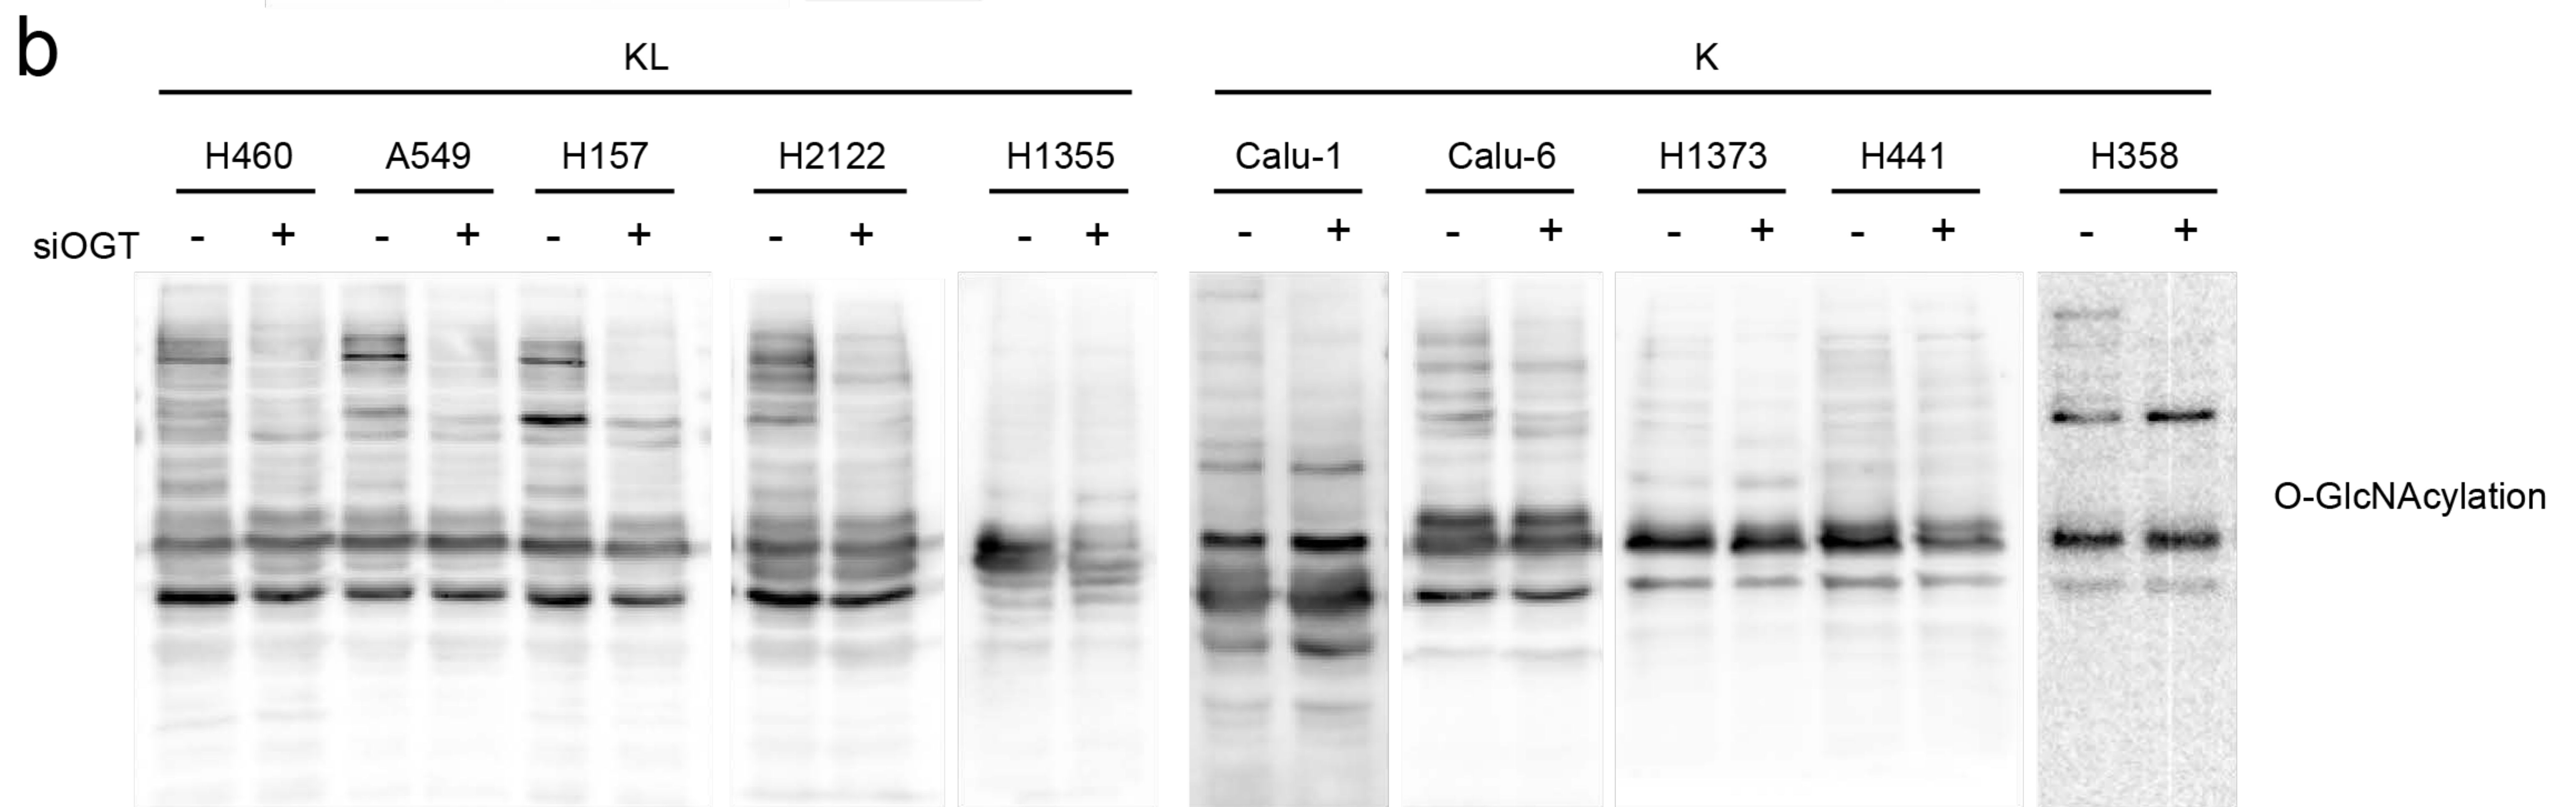

bioRxiv preprint doi: <https://doi.org/10.1101/2020.04.13.039669>; this version posted April 14, 2020. The copyright holder for this preprint (which was not certified by peer review) is the author/funder. All rights reserved. No reuse allowed without permission.

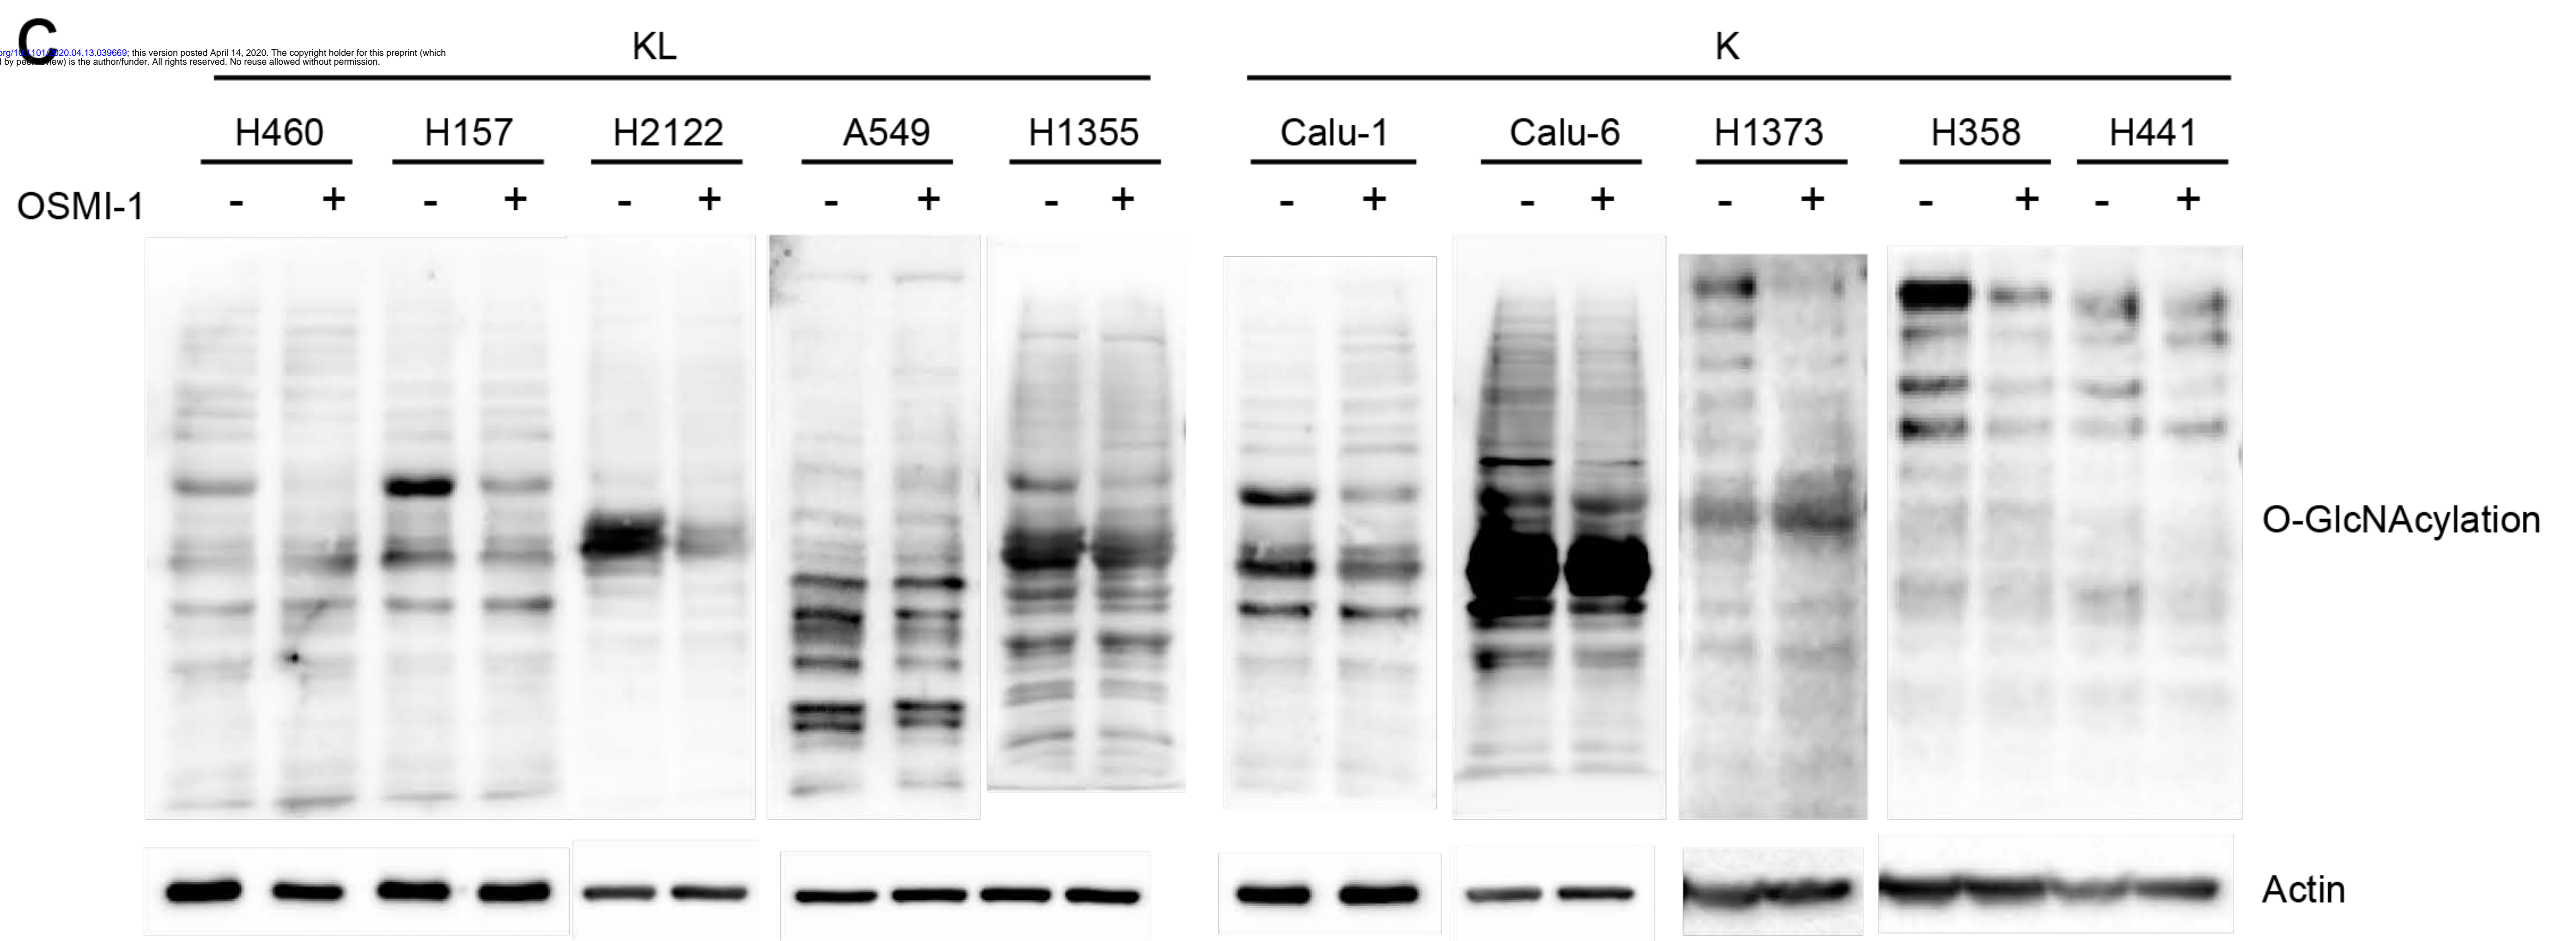



# Supplementary Figure 6

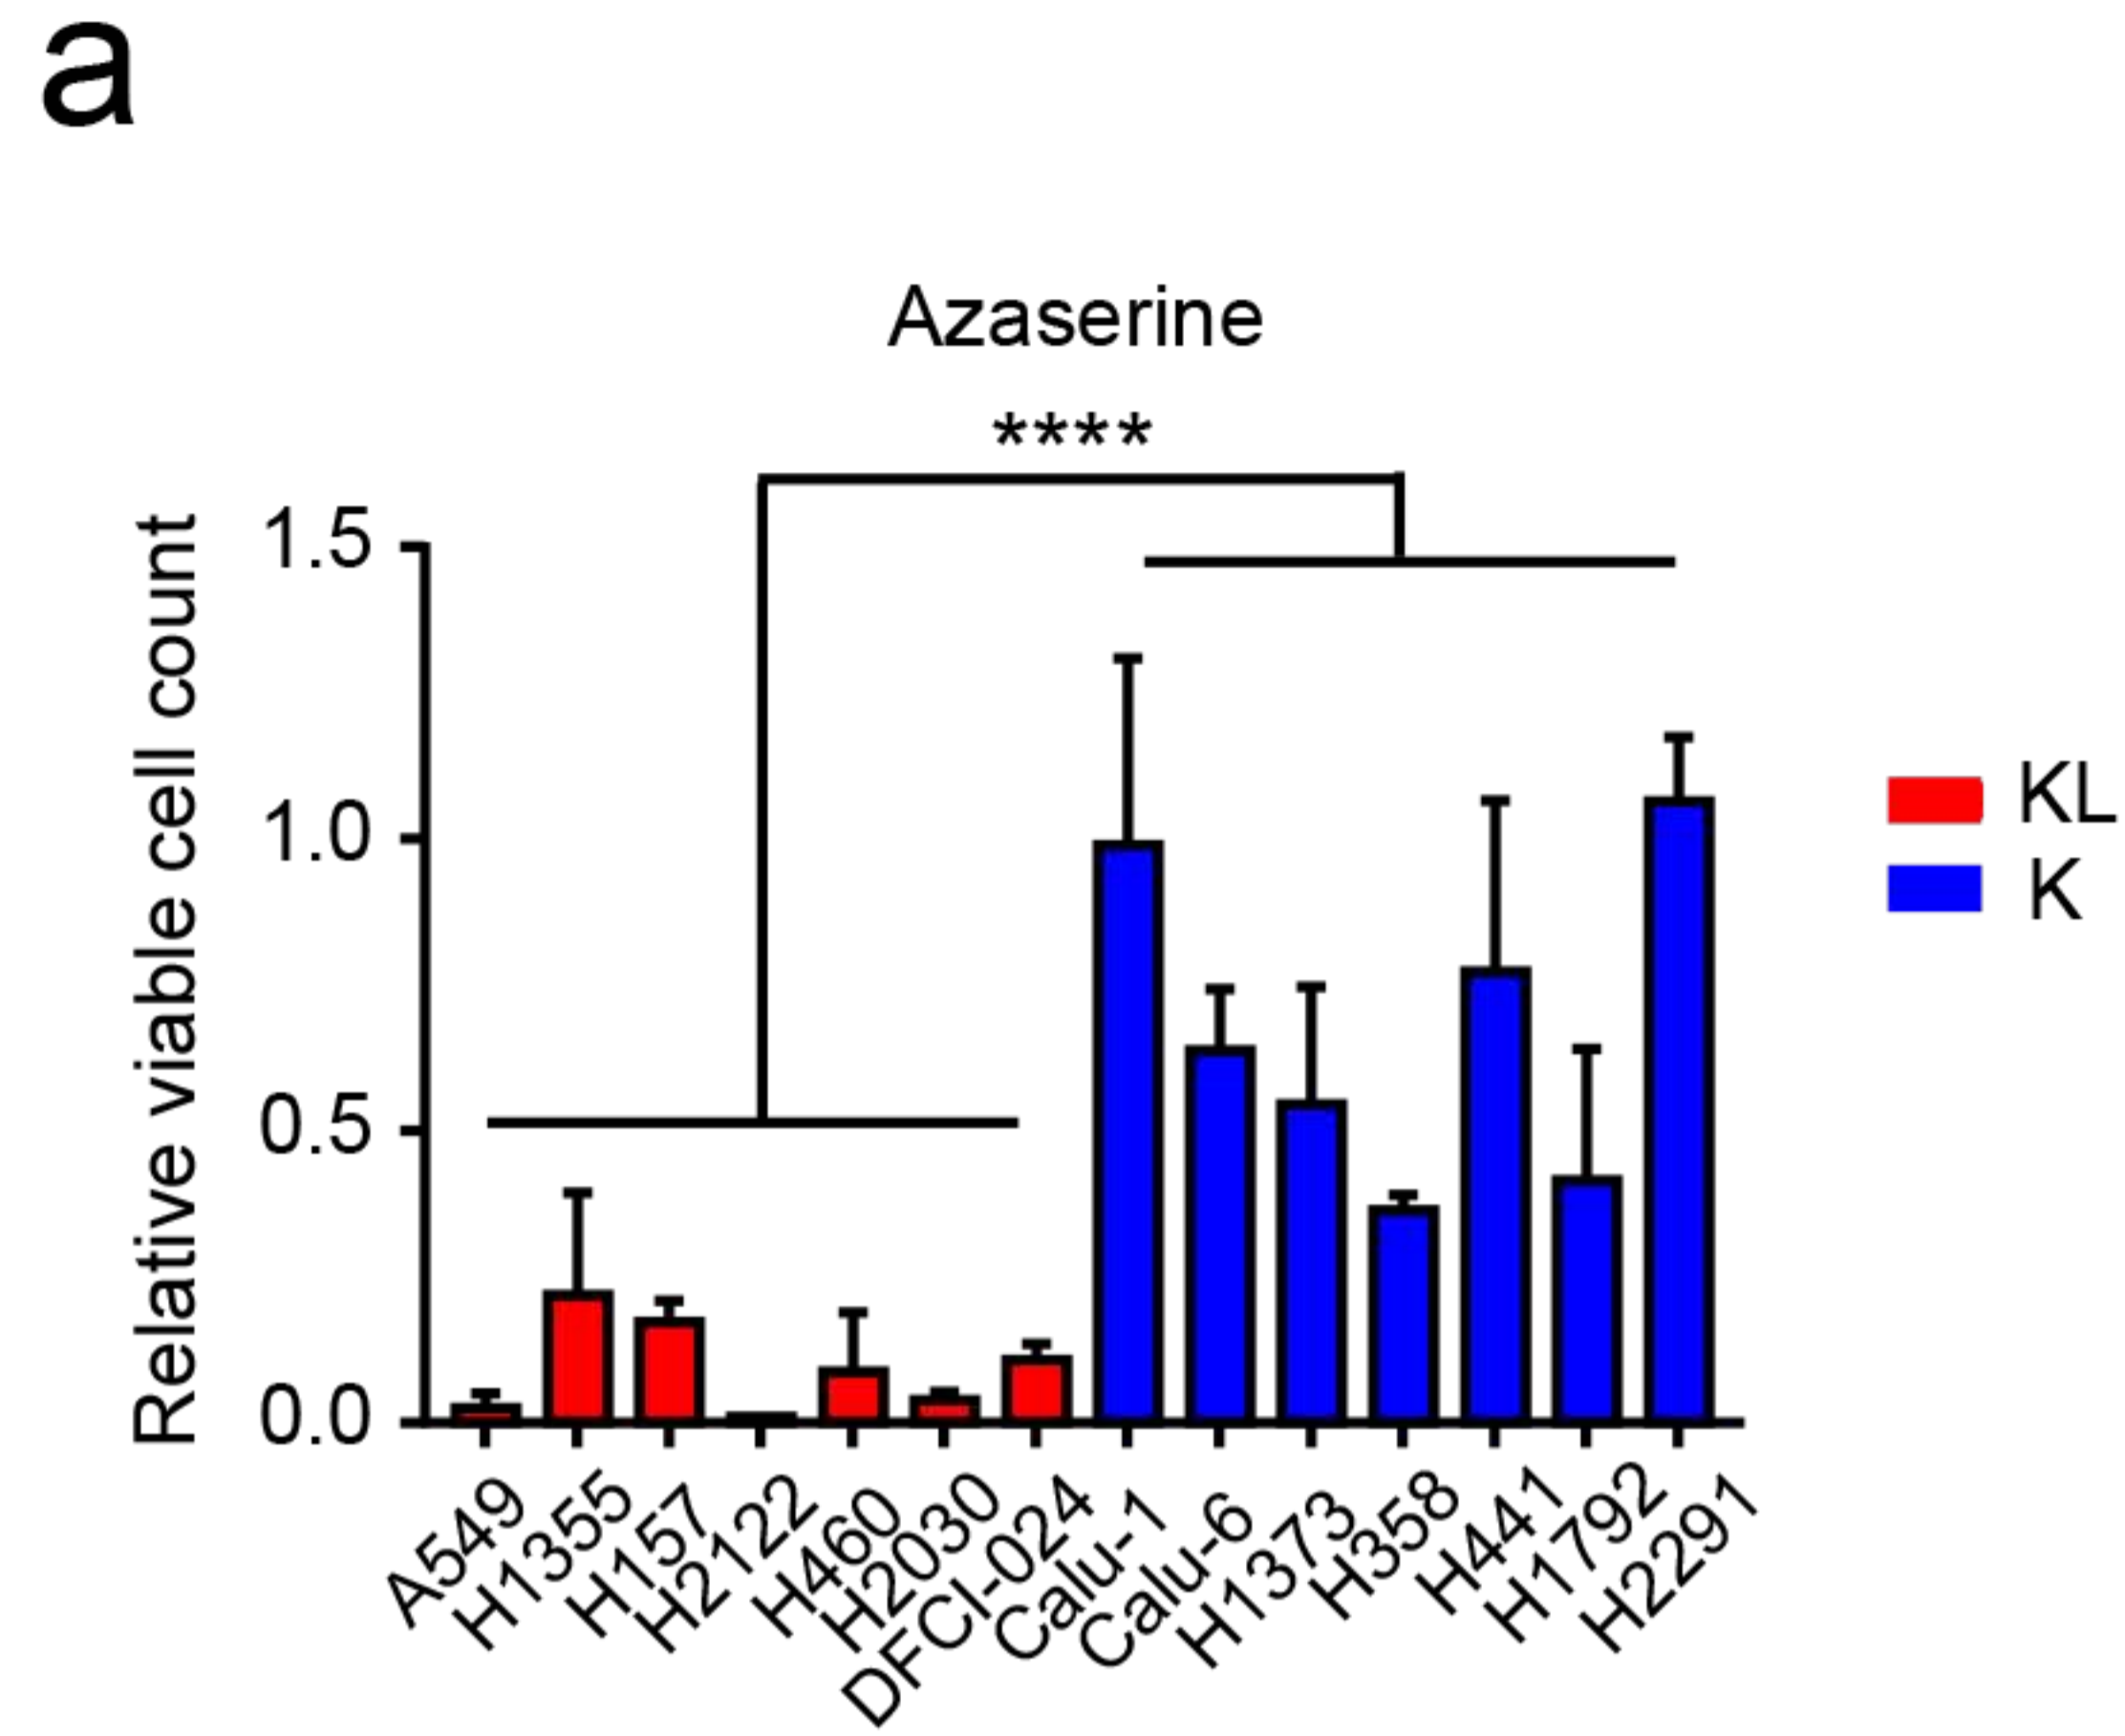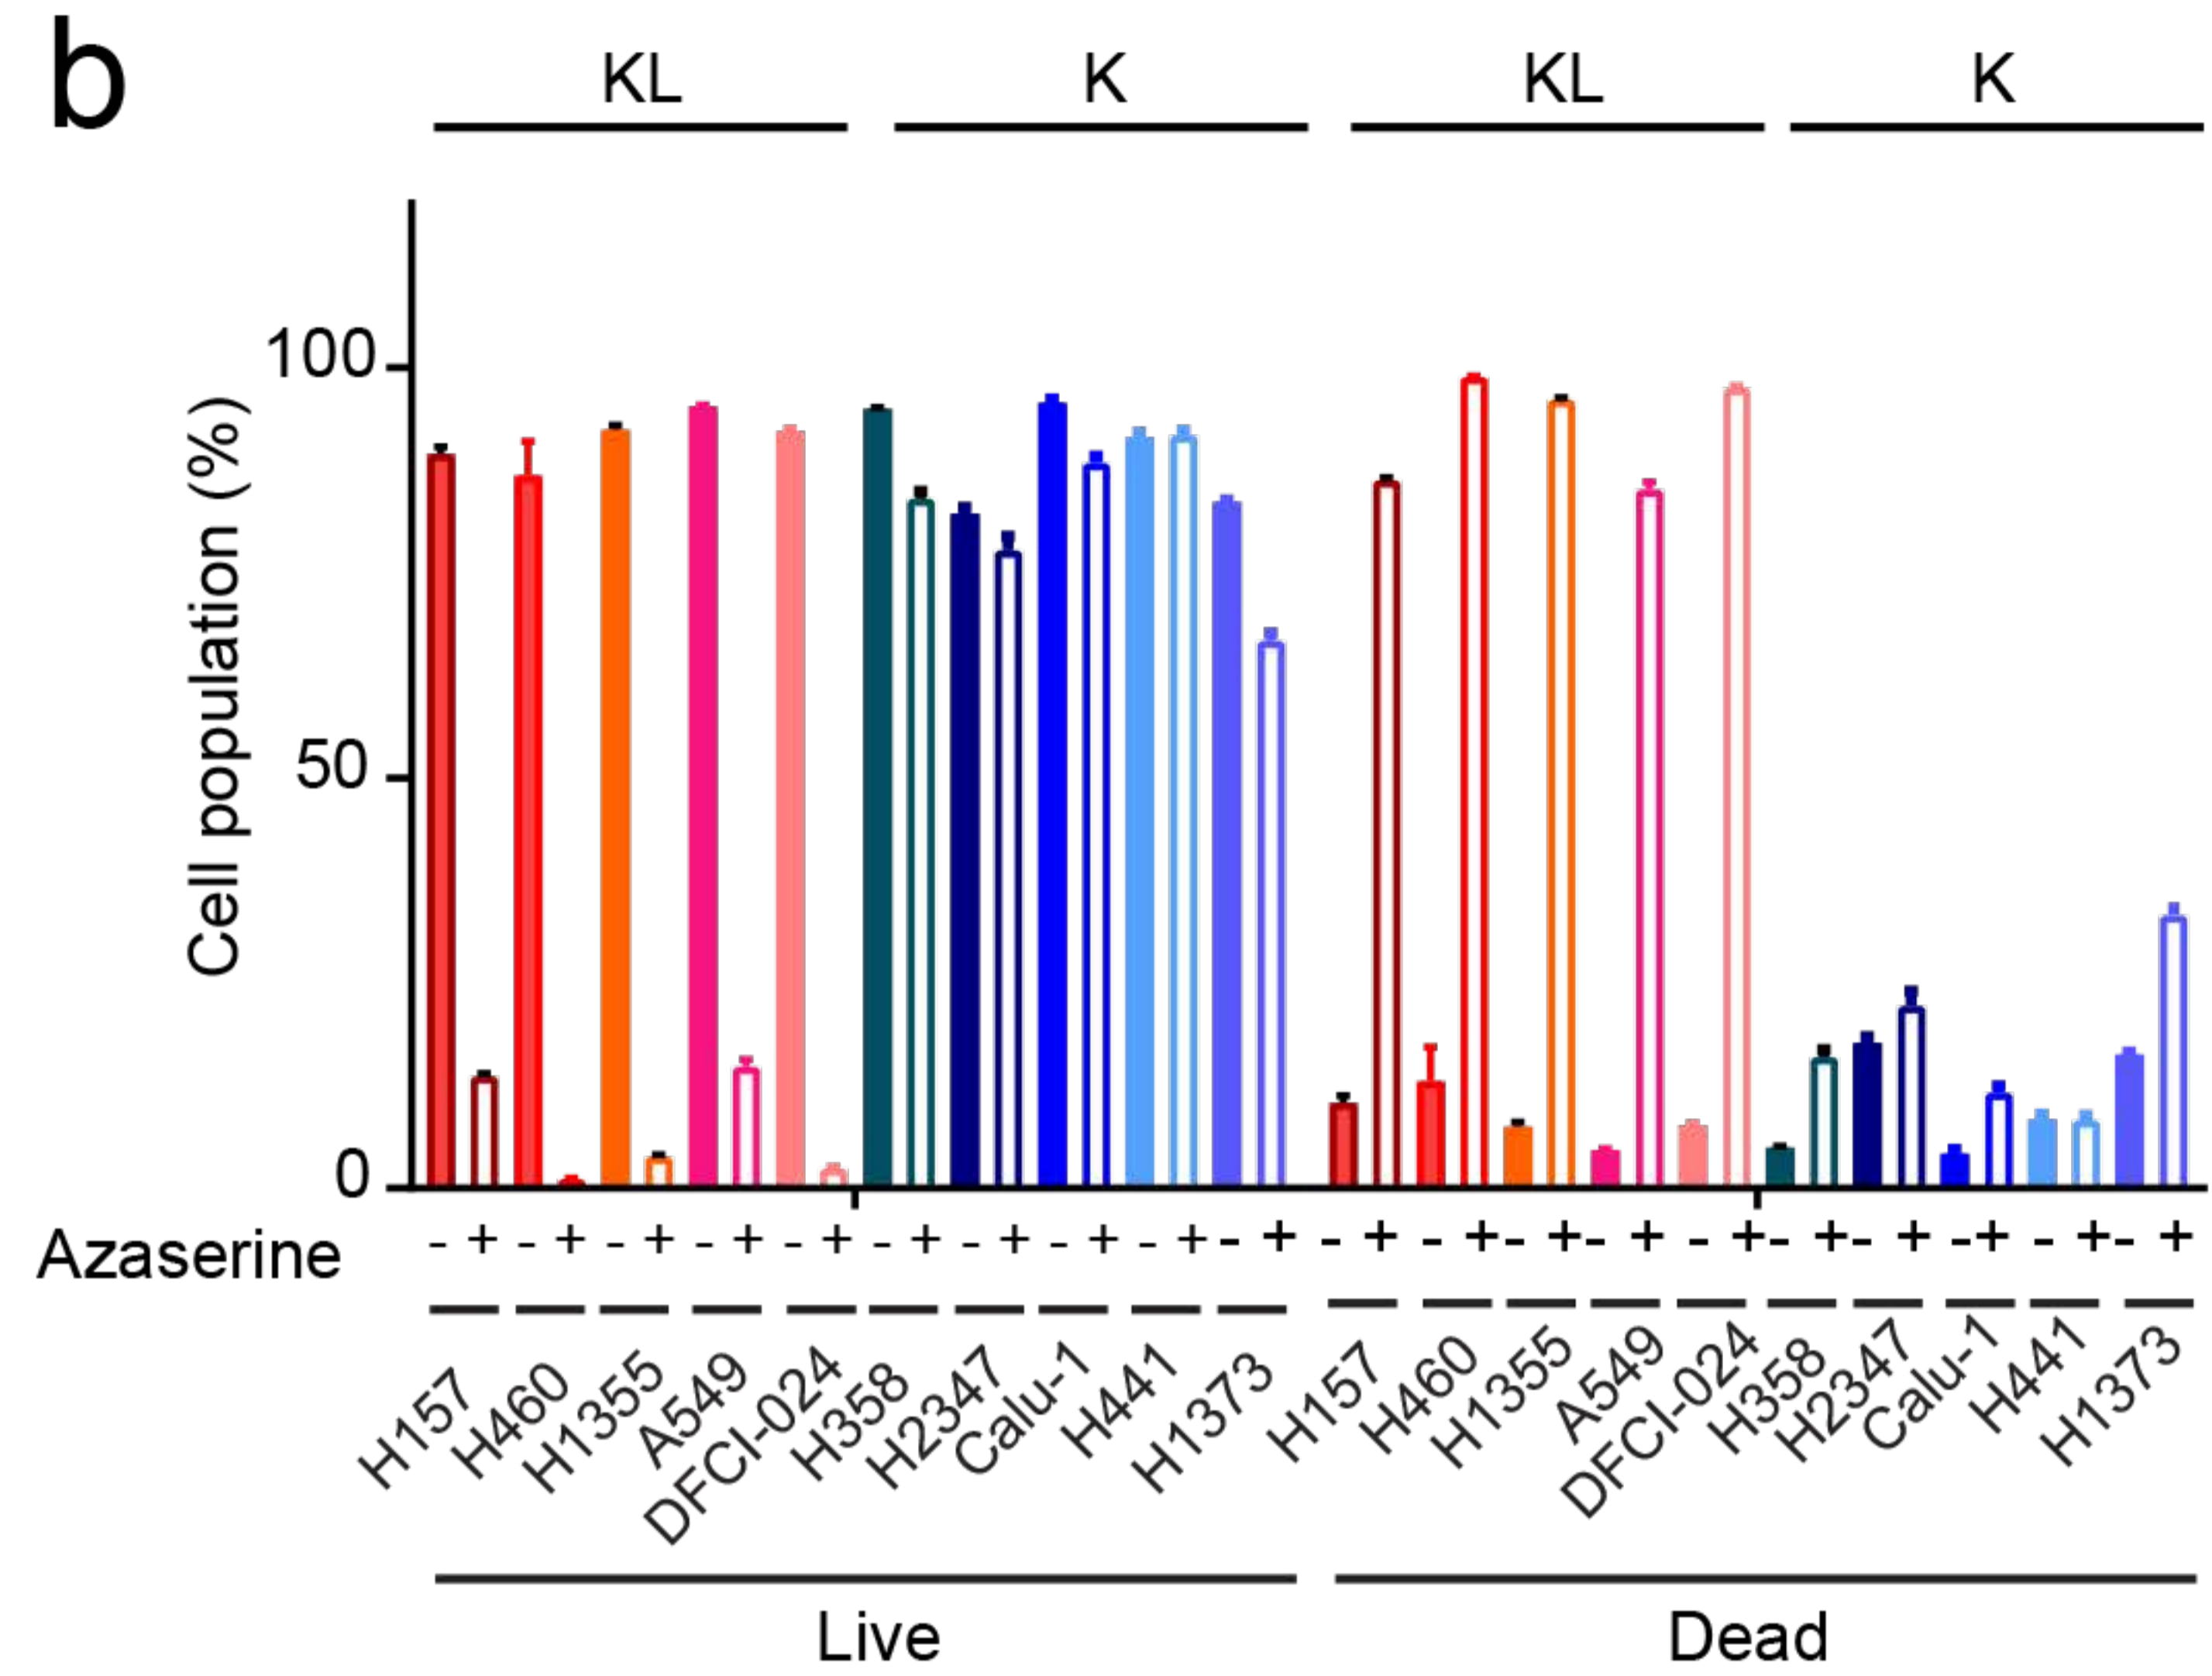

bioRxiv preprint doi: <https://doi.org/10.1101/2020.04.13.039669>; this version posted April 14, 2020. The copyright holder for this preprint (which was not certified by peer review) is the author/funder. All rights reserved. No reuse allowed without permission.

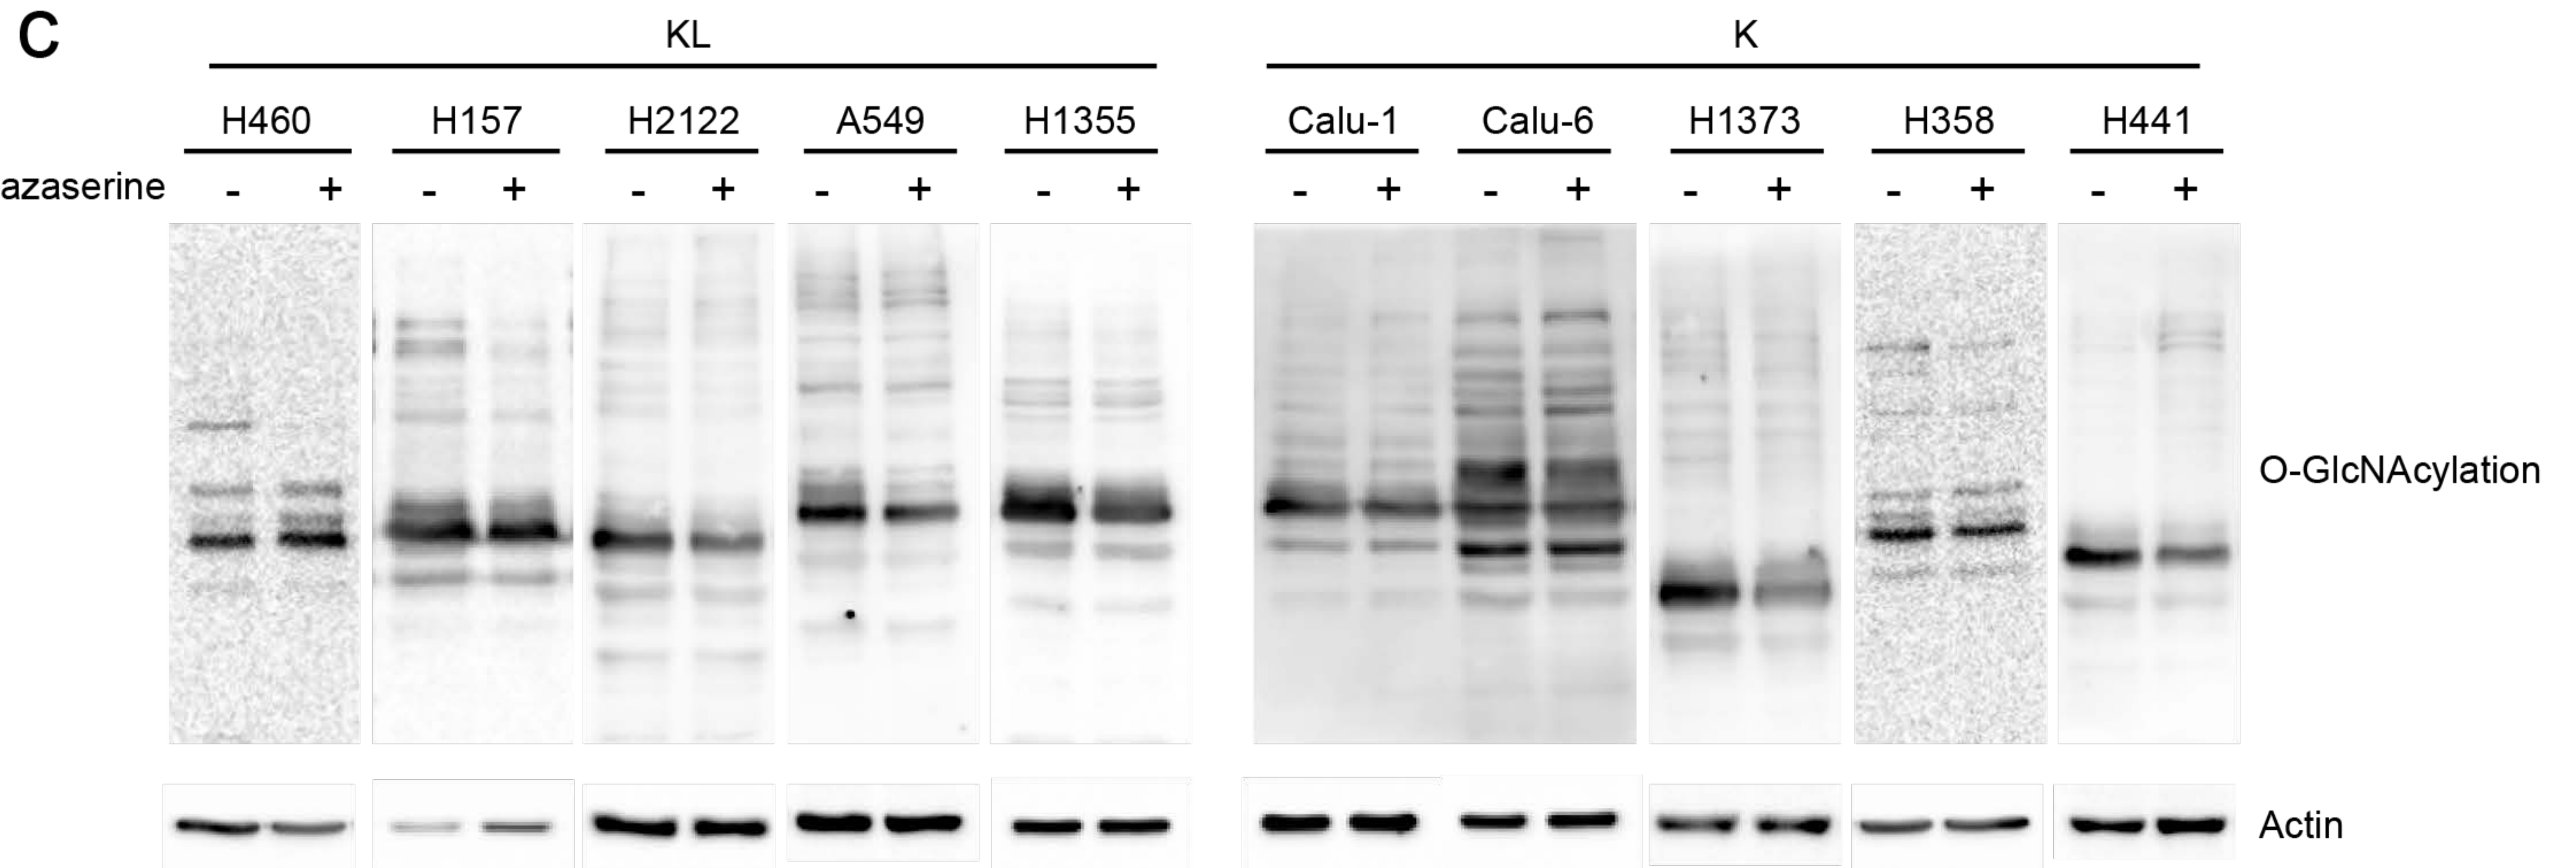



# Supplementary Figure 7

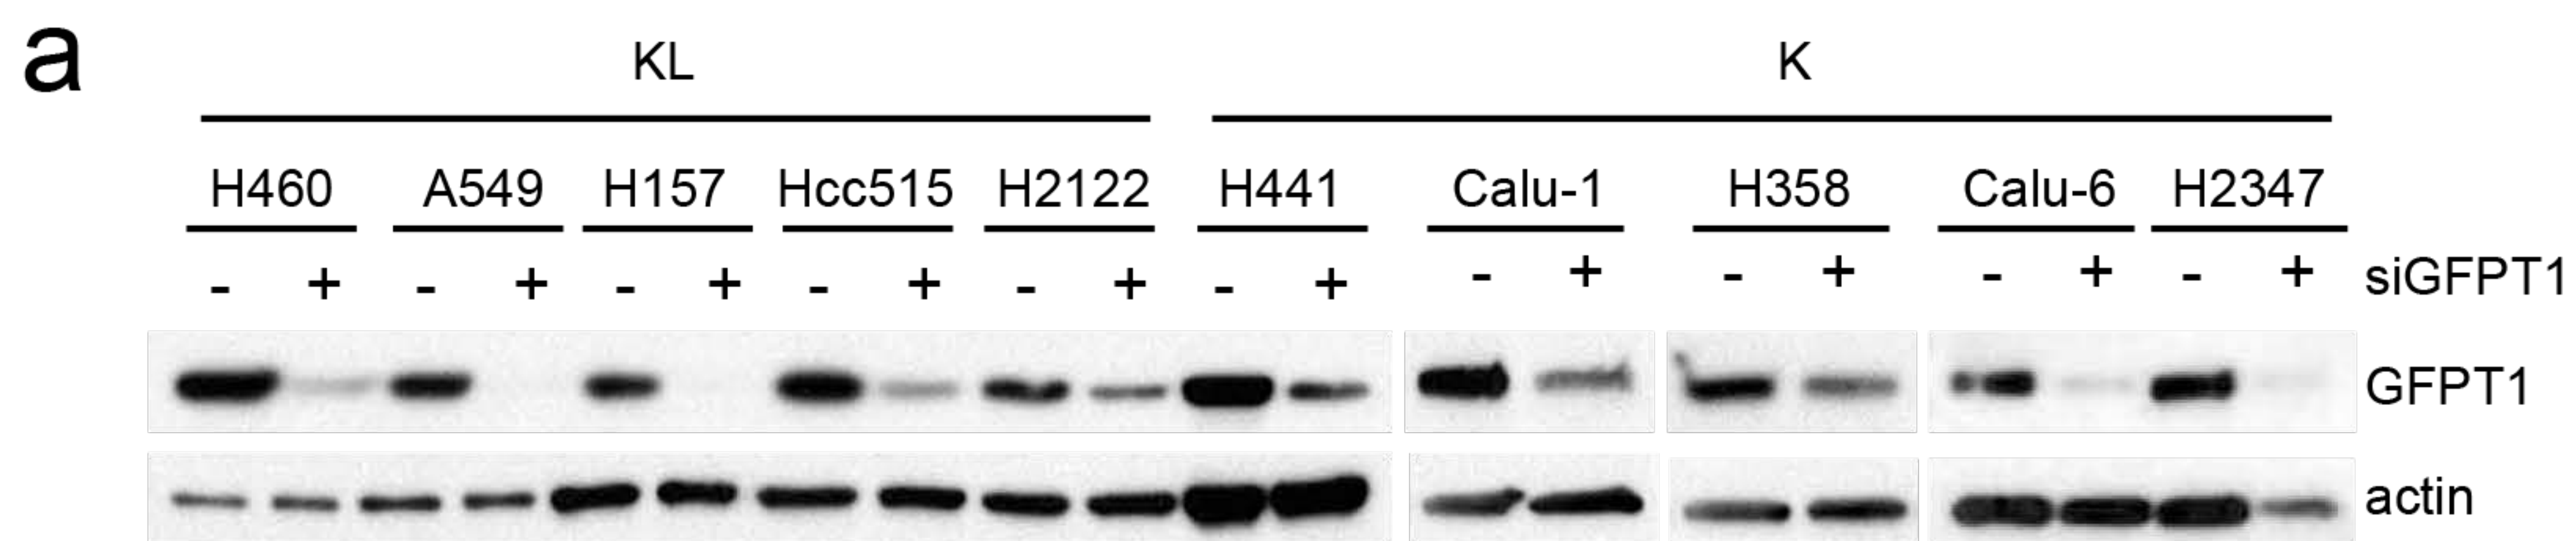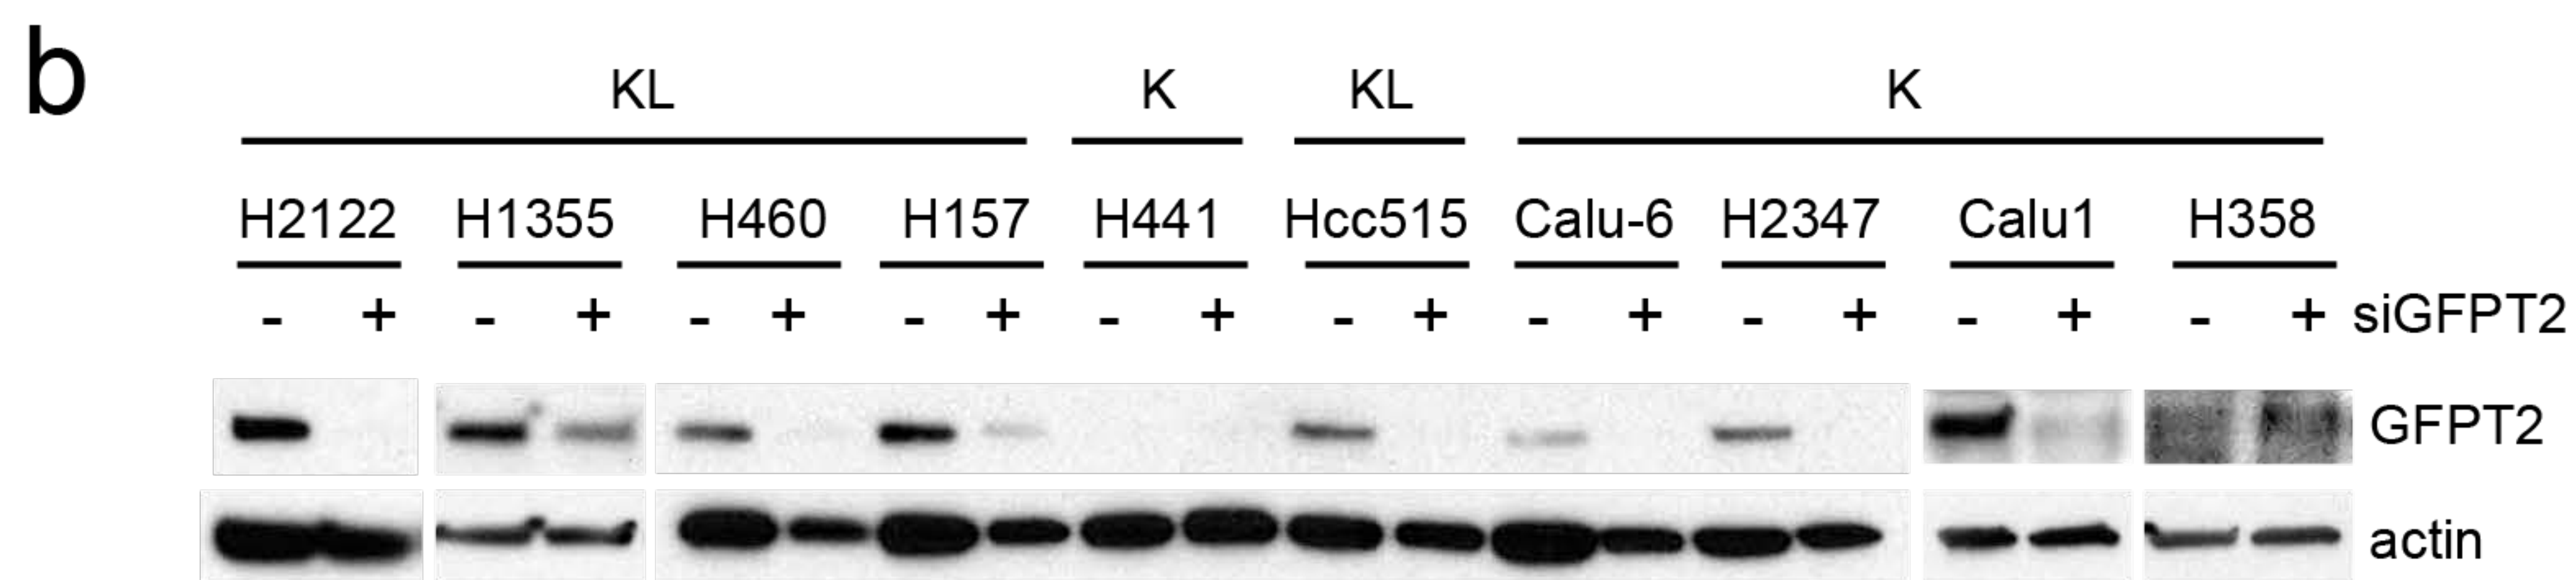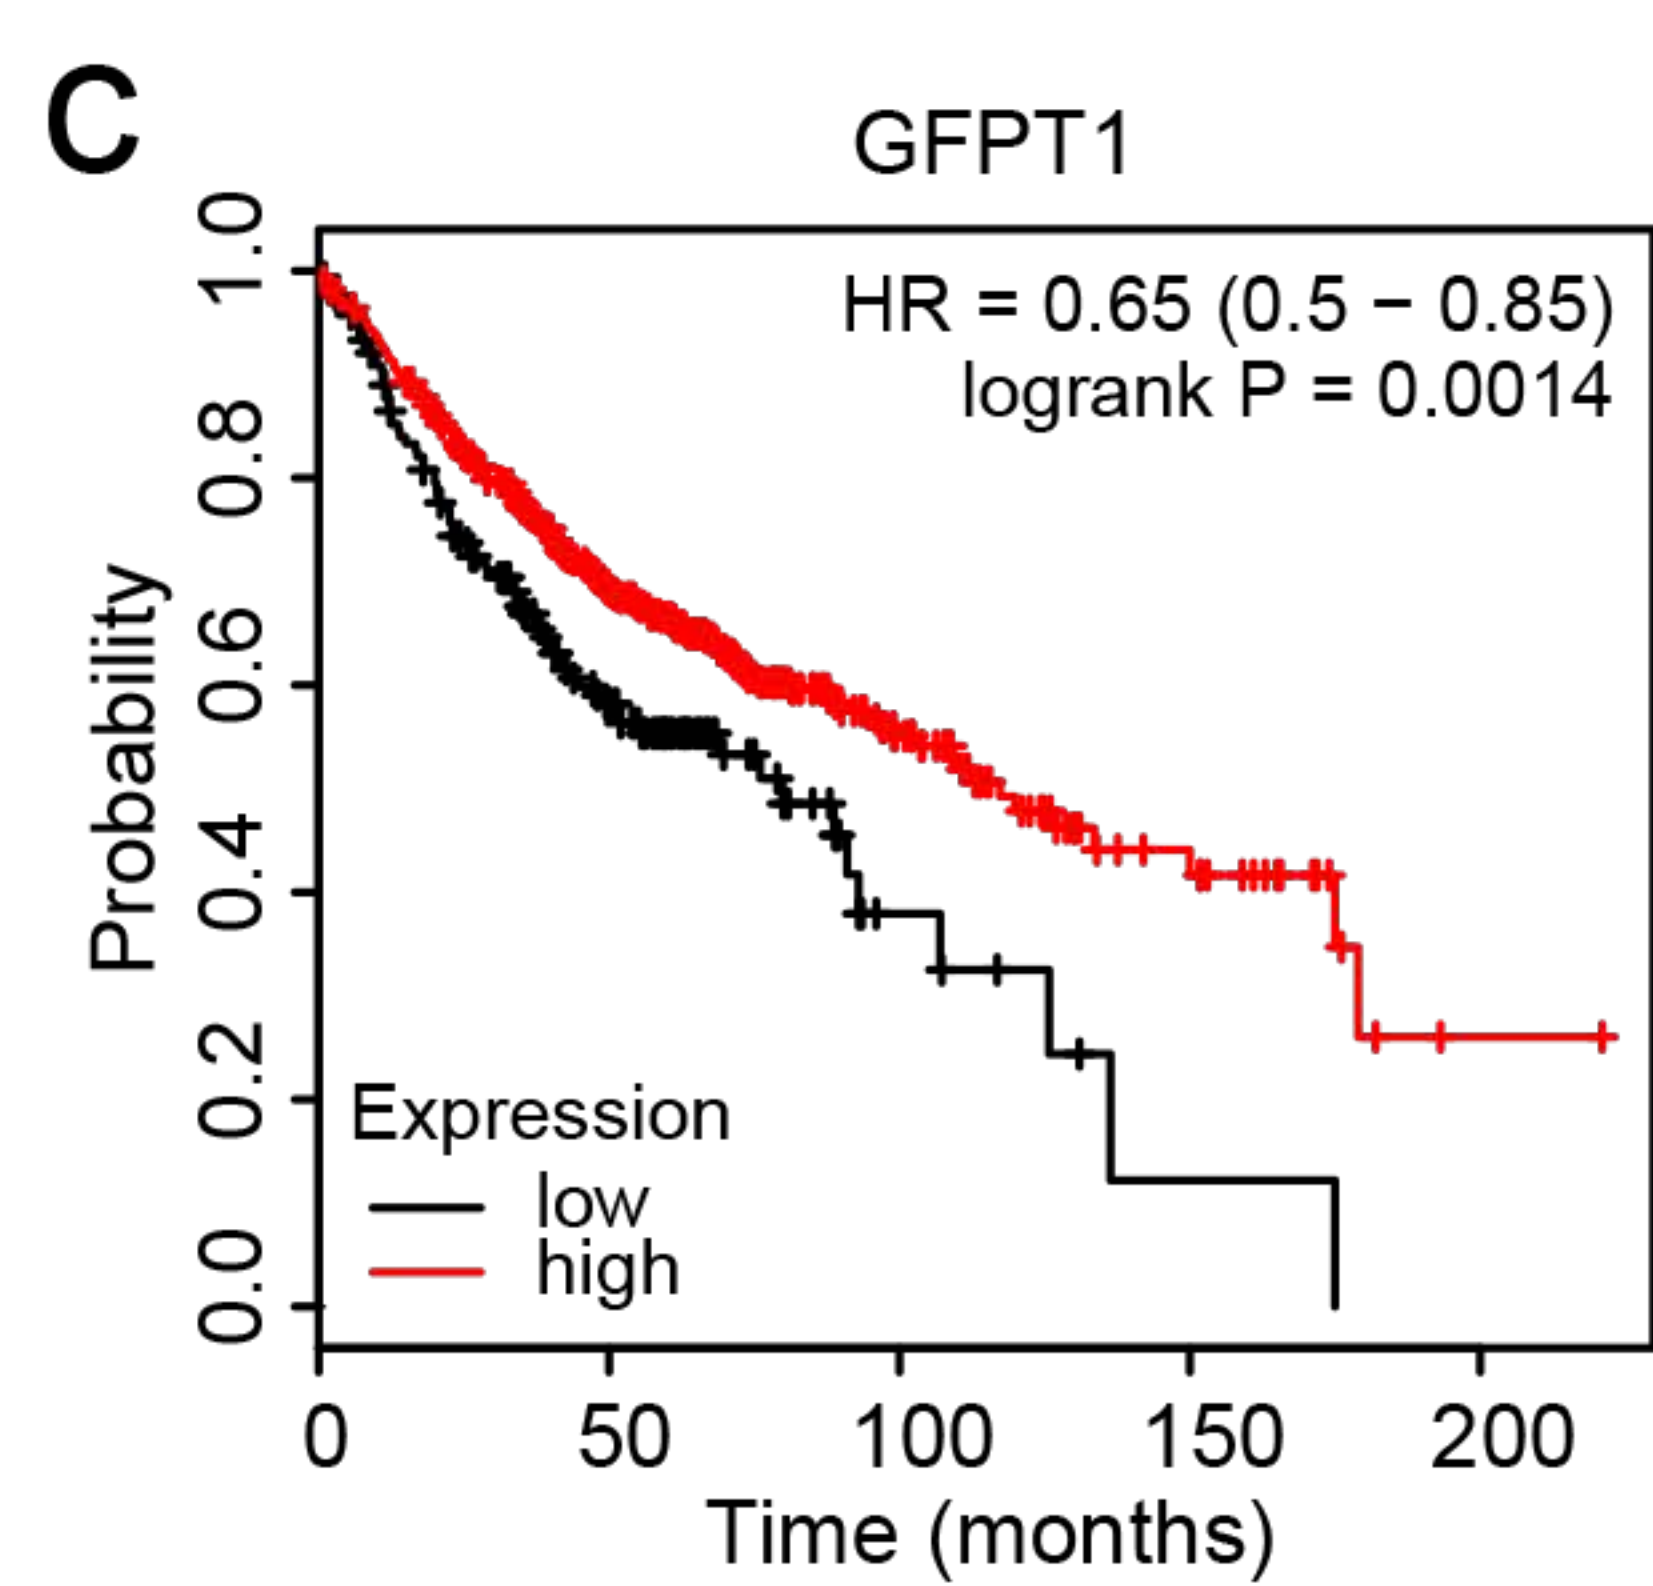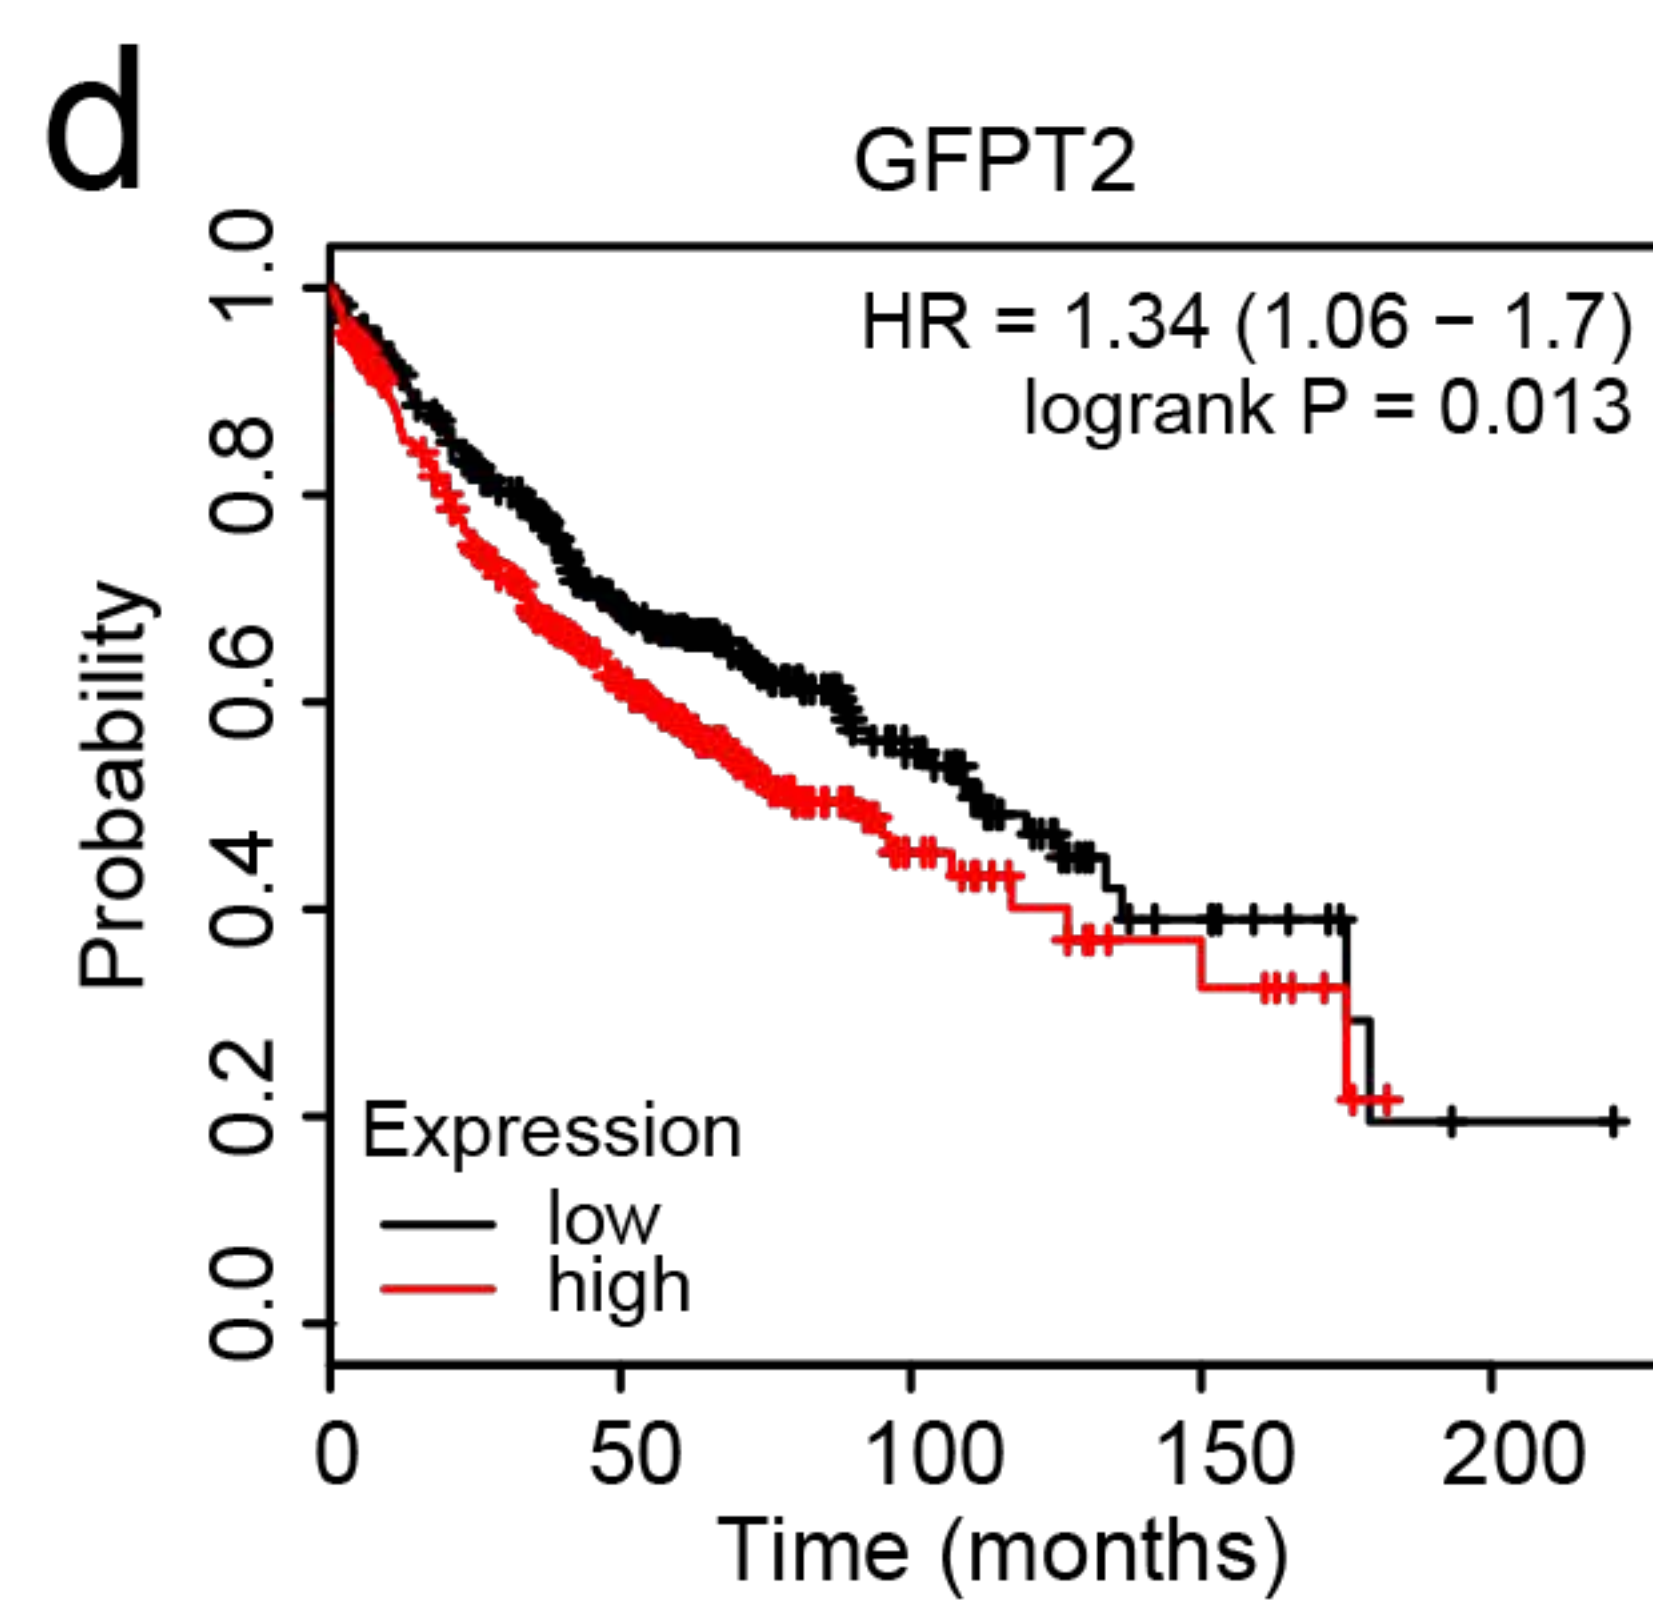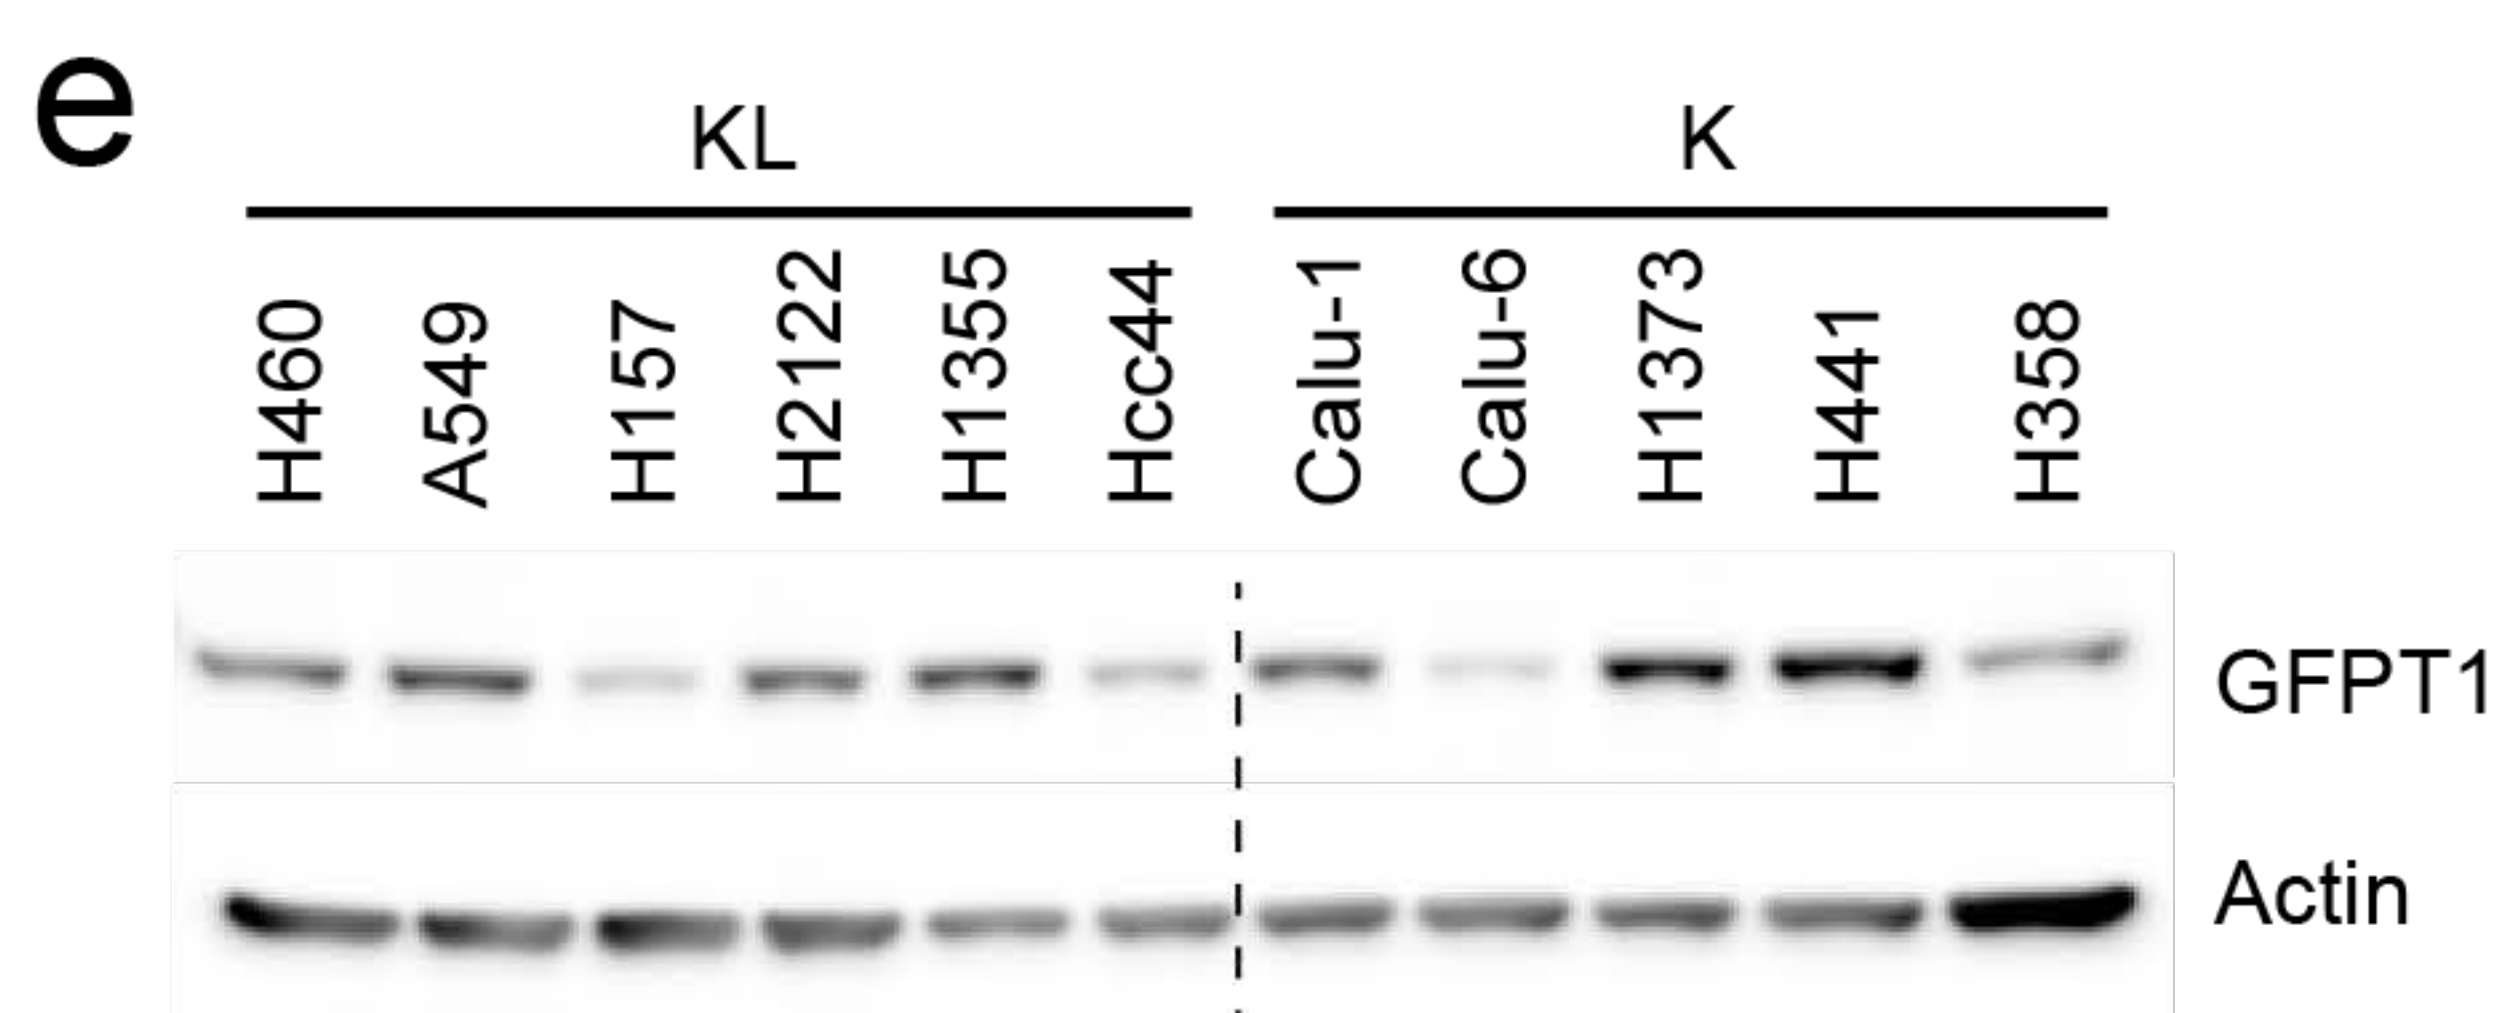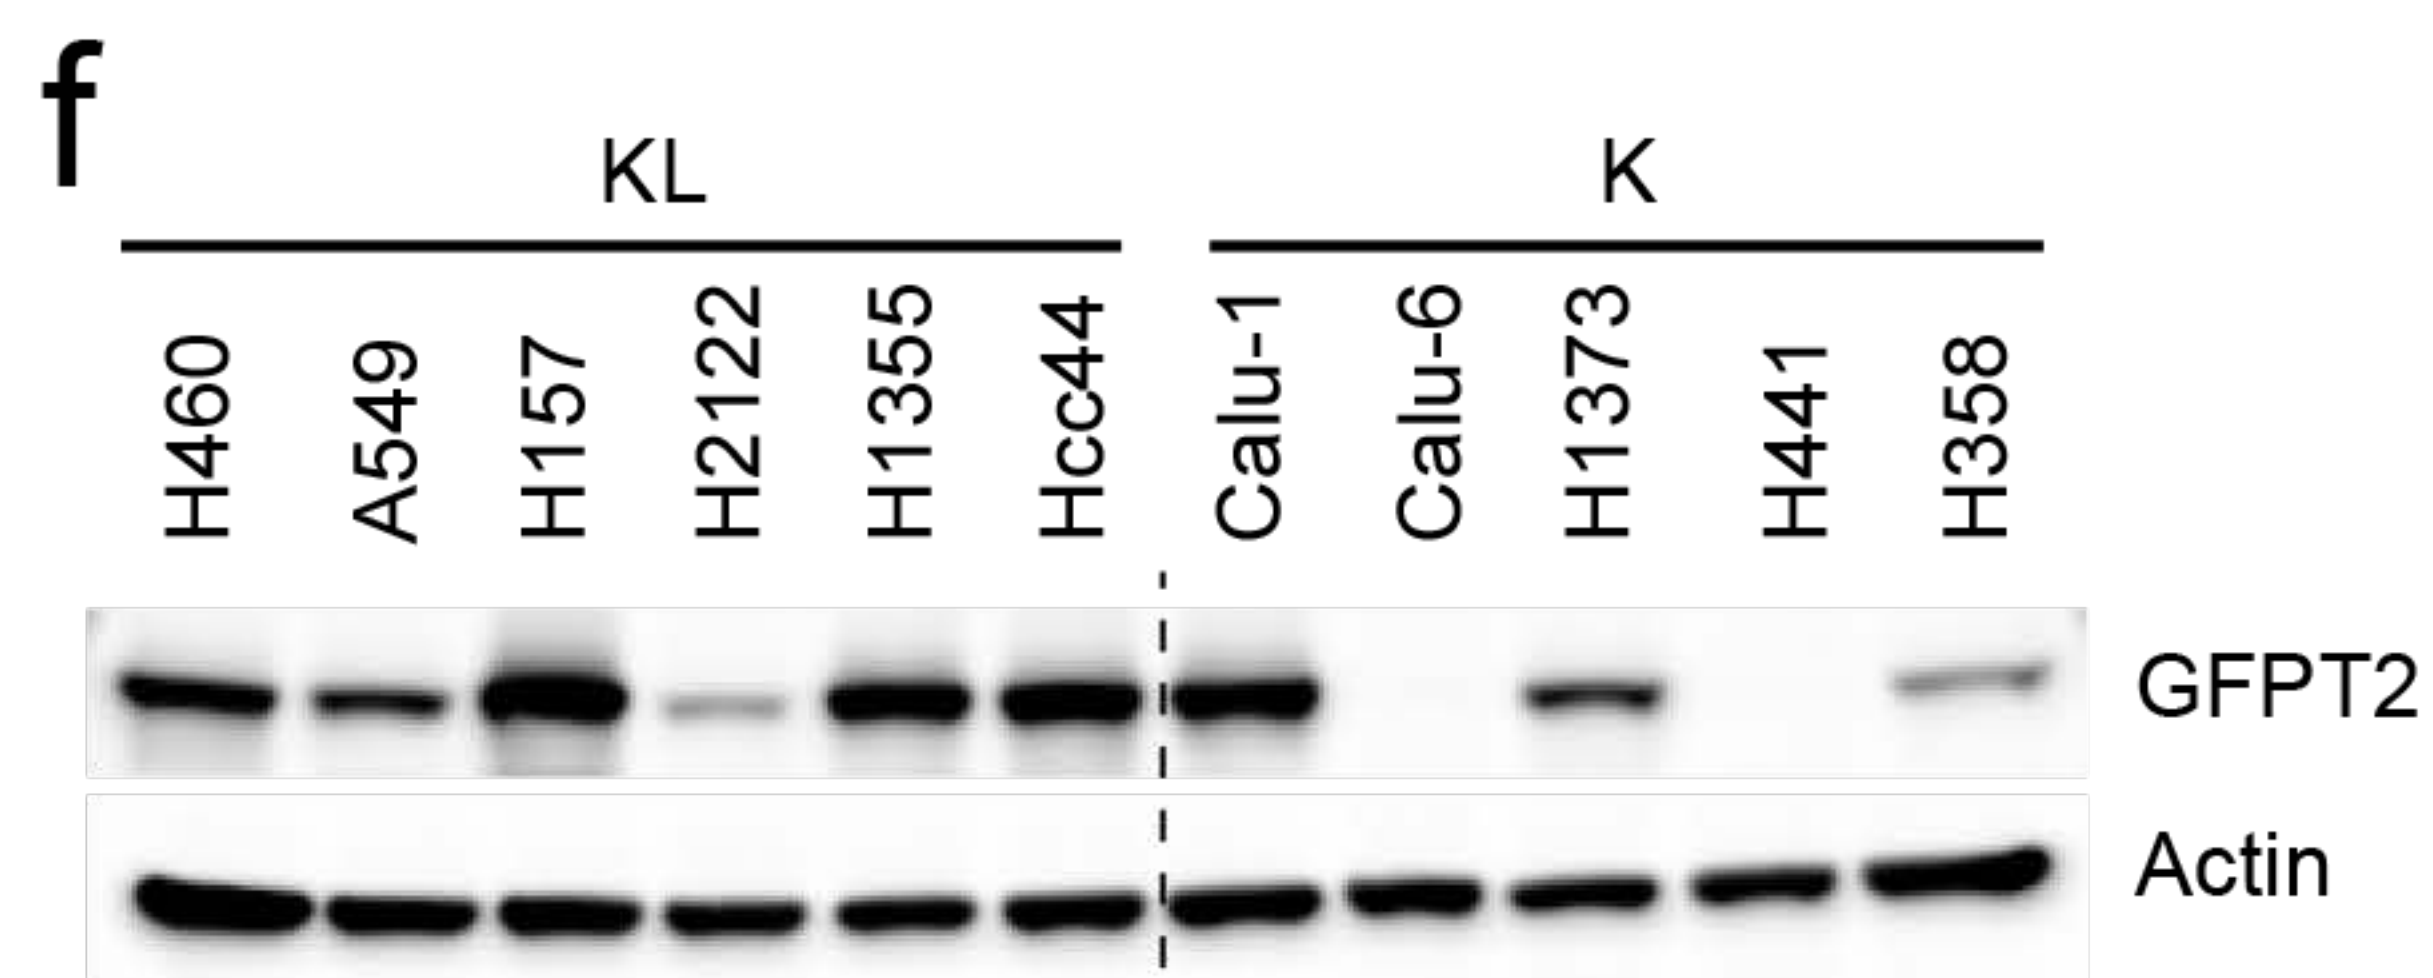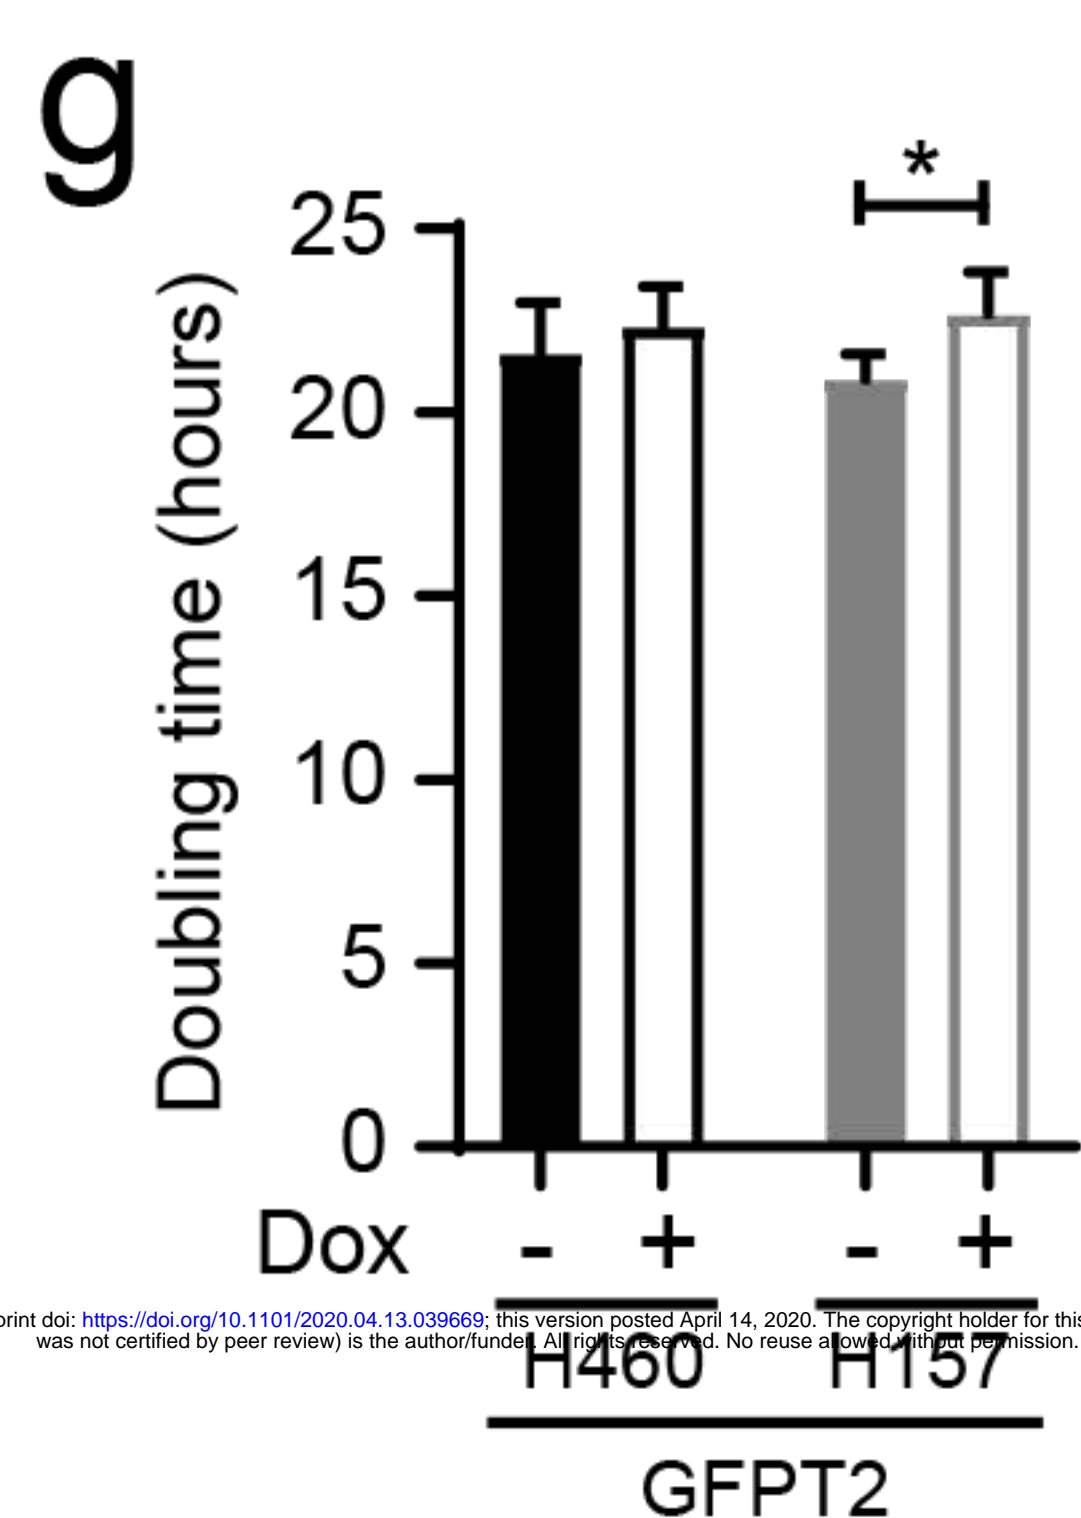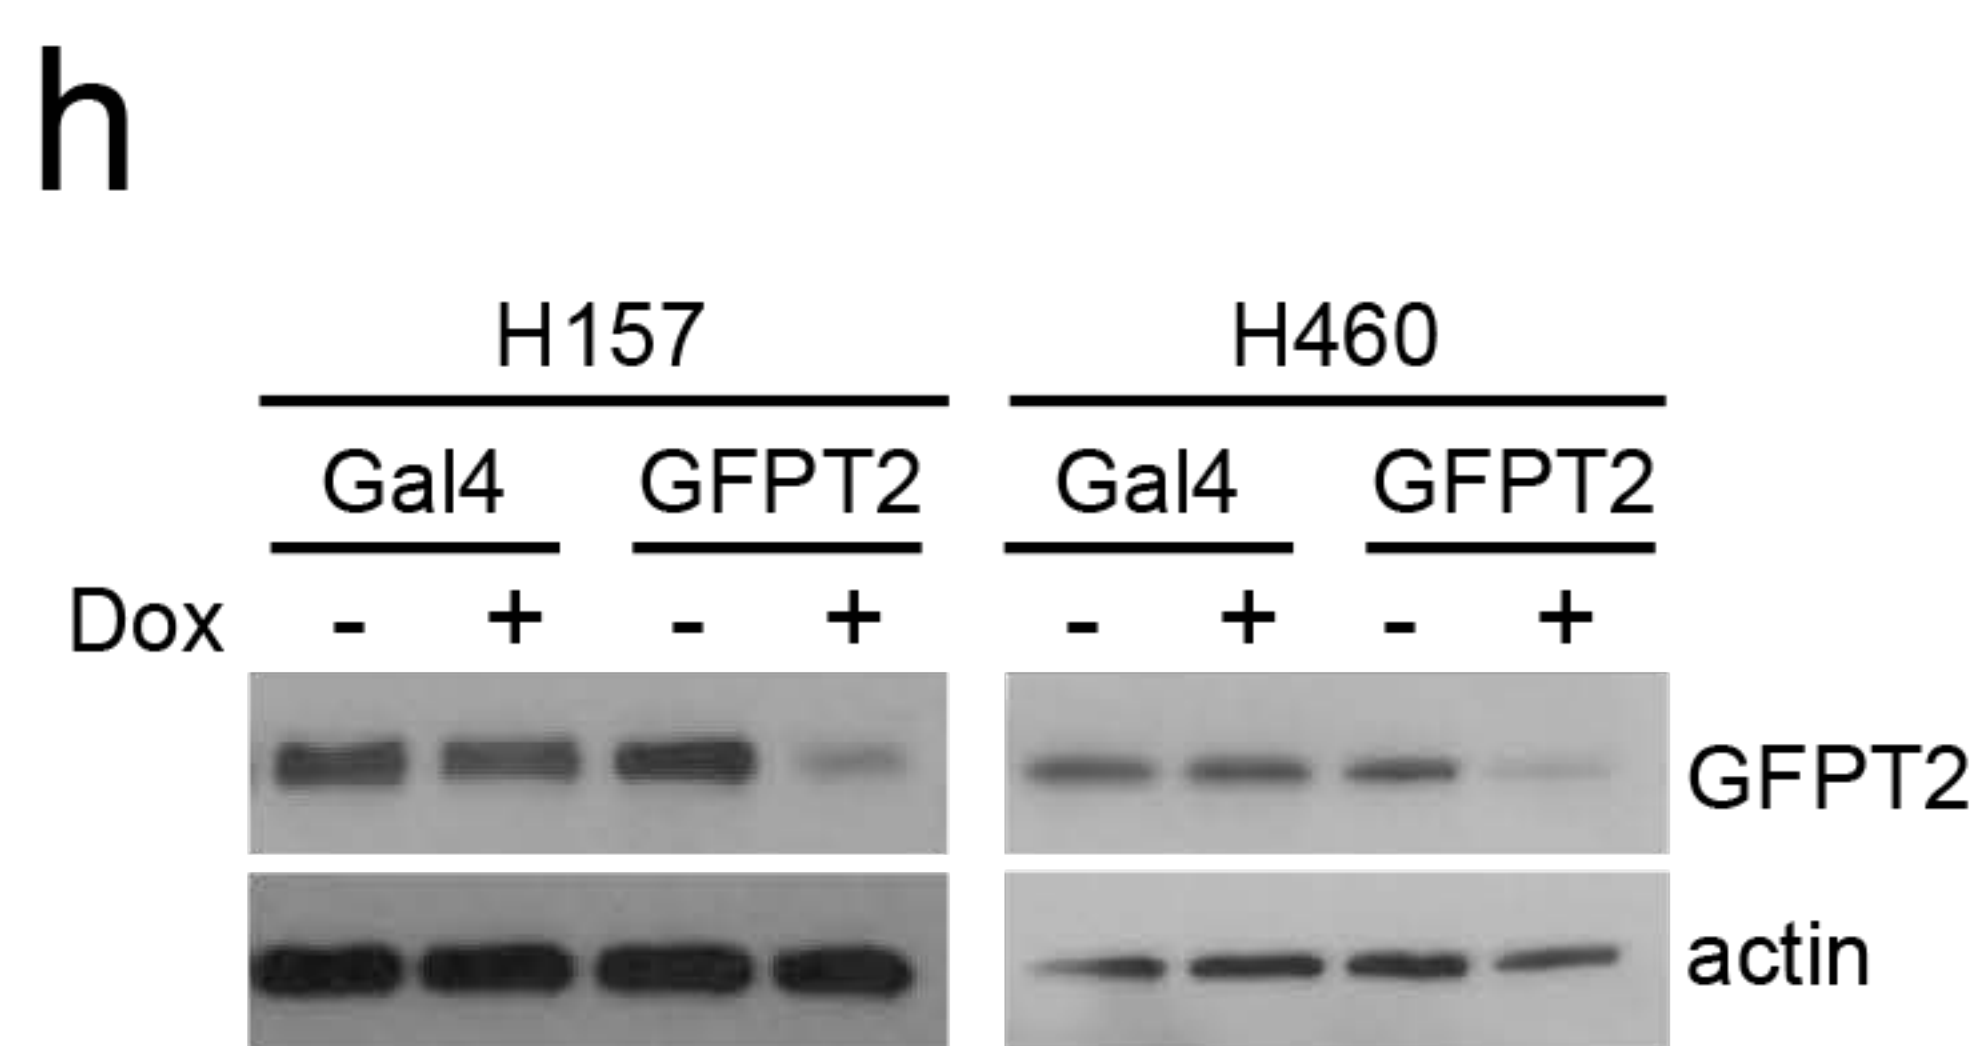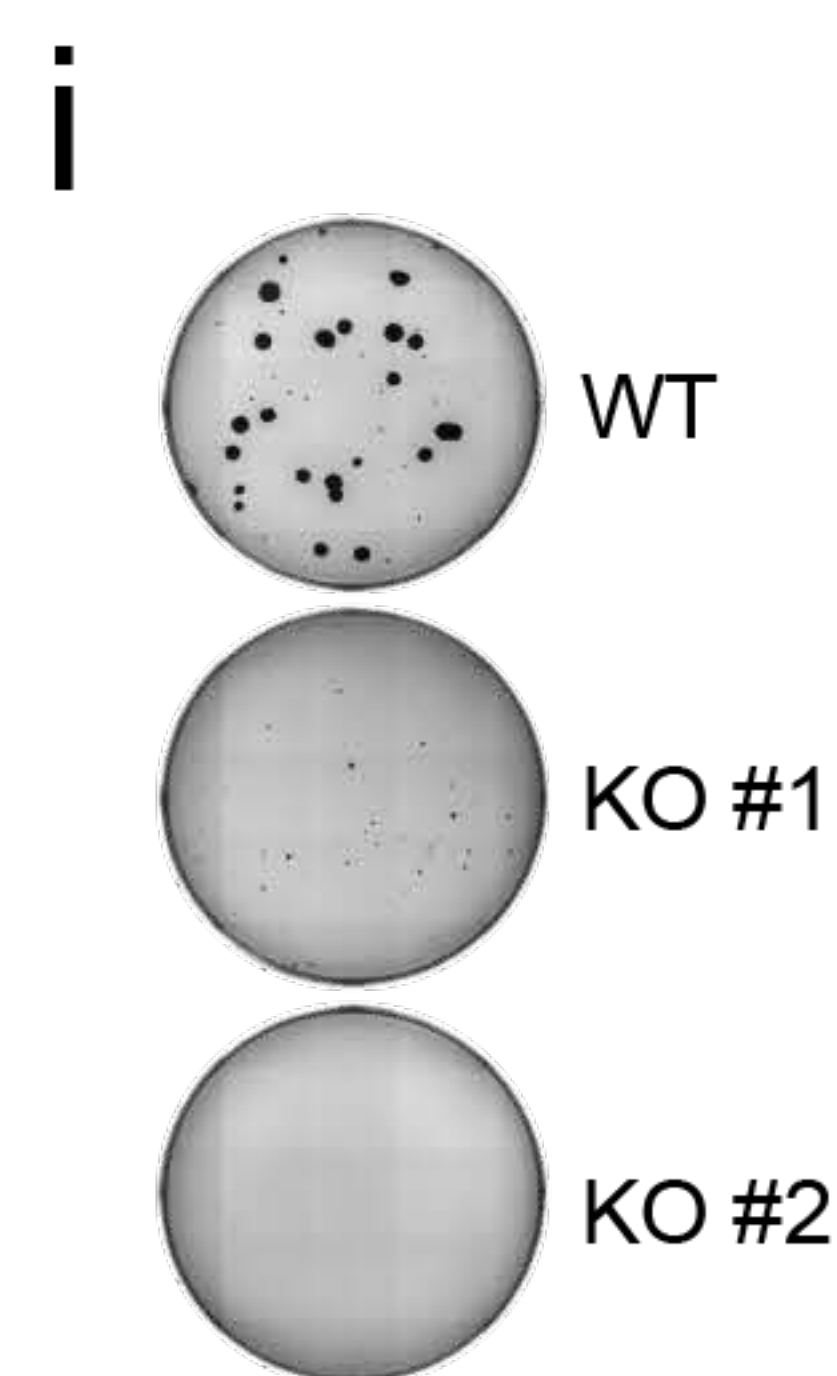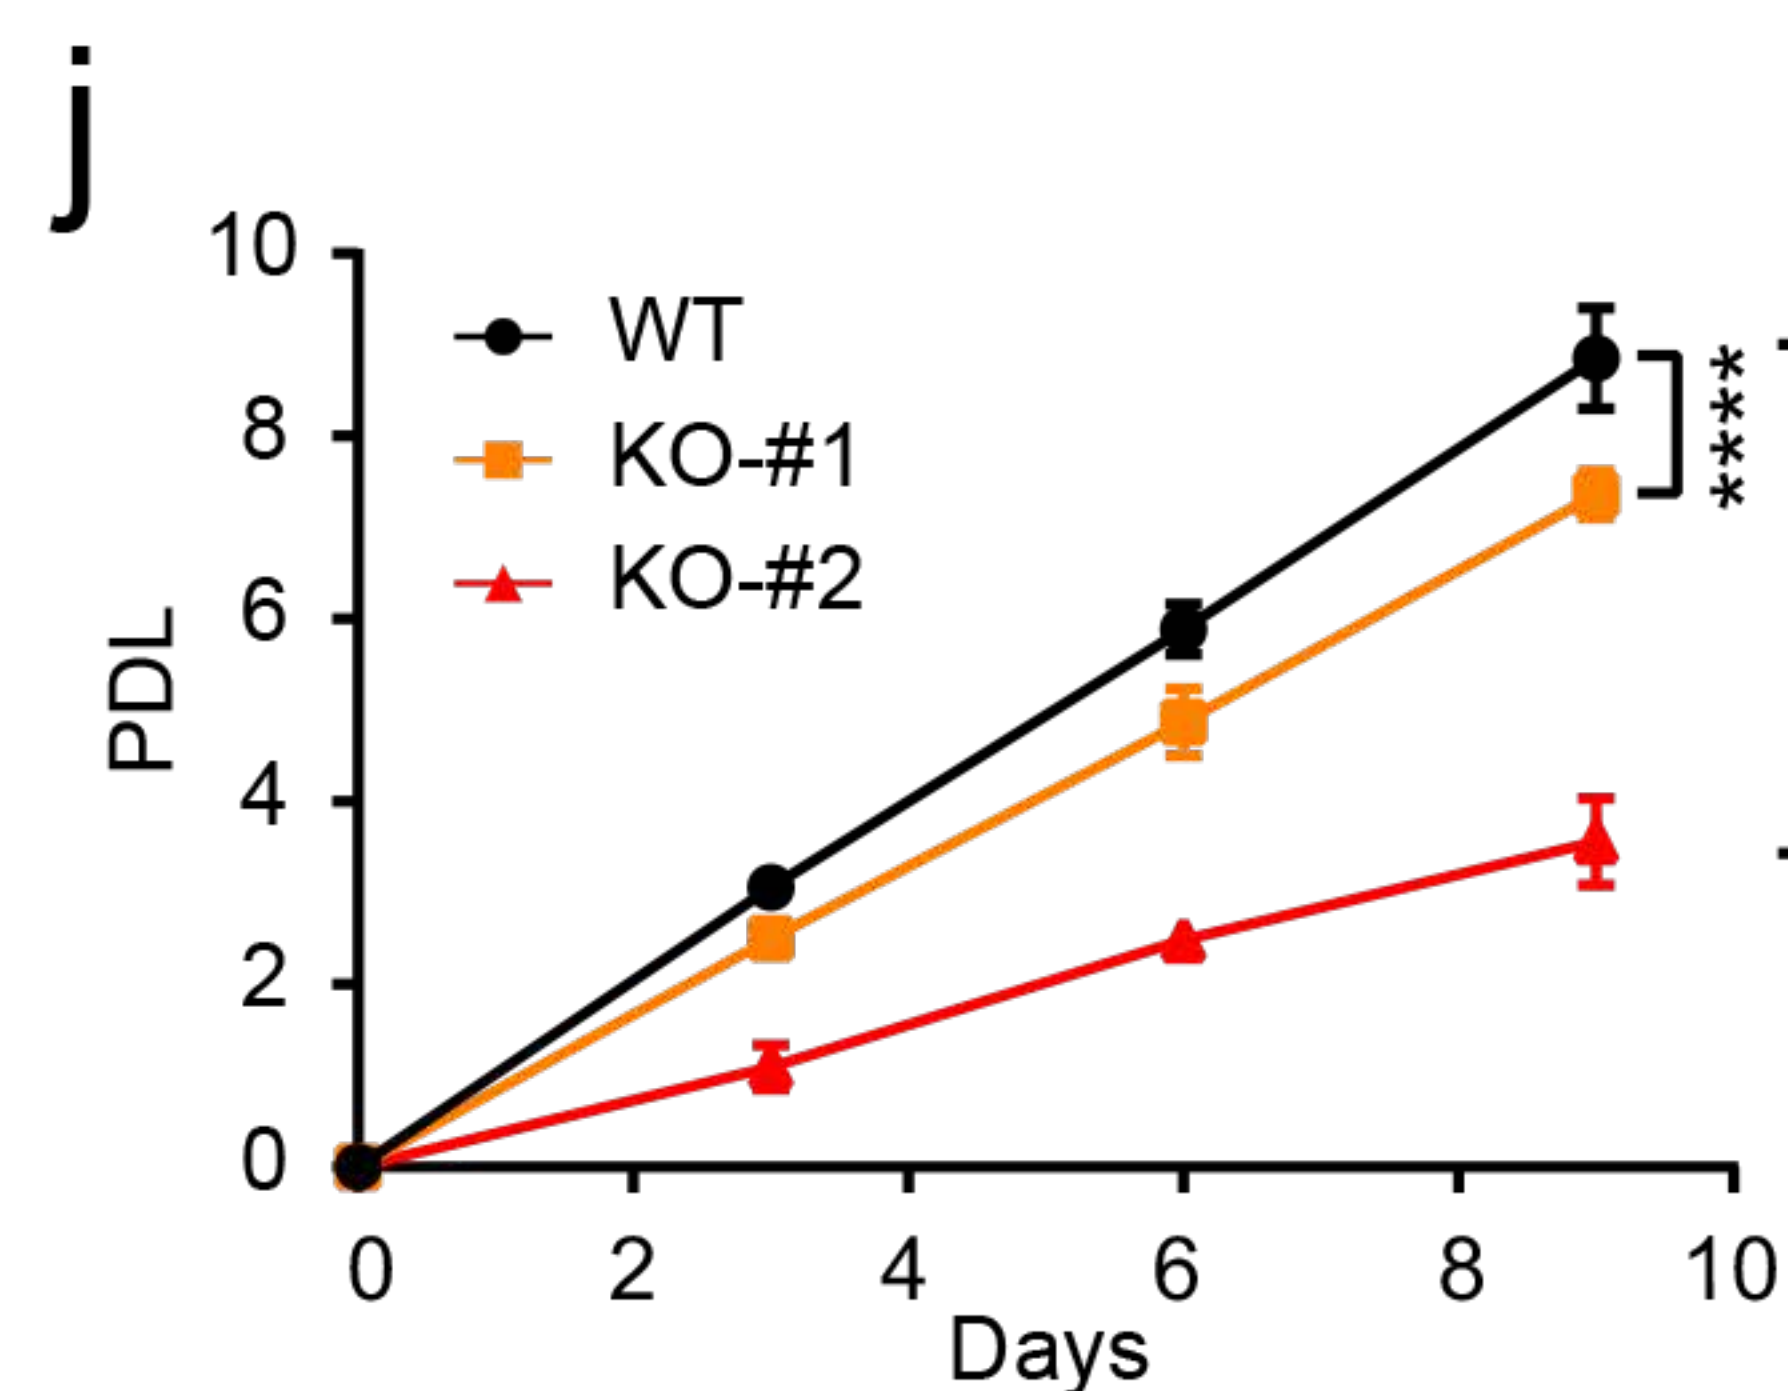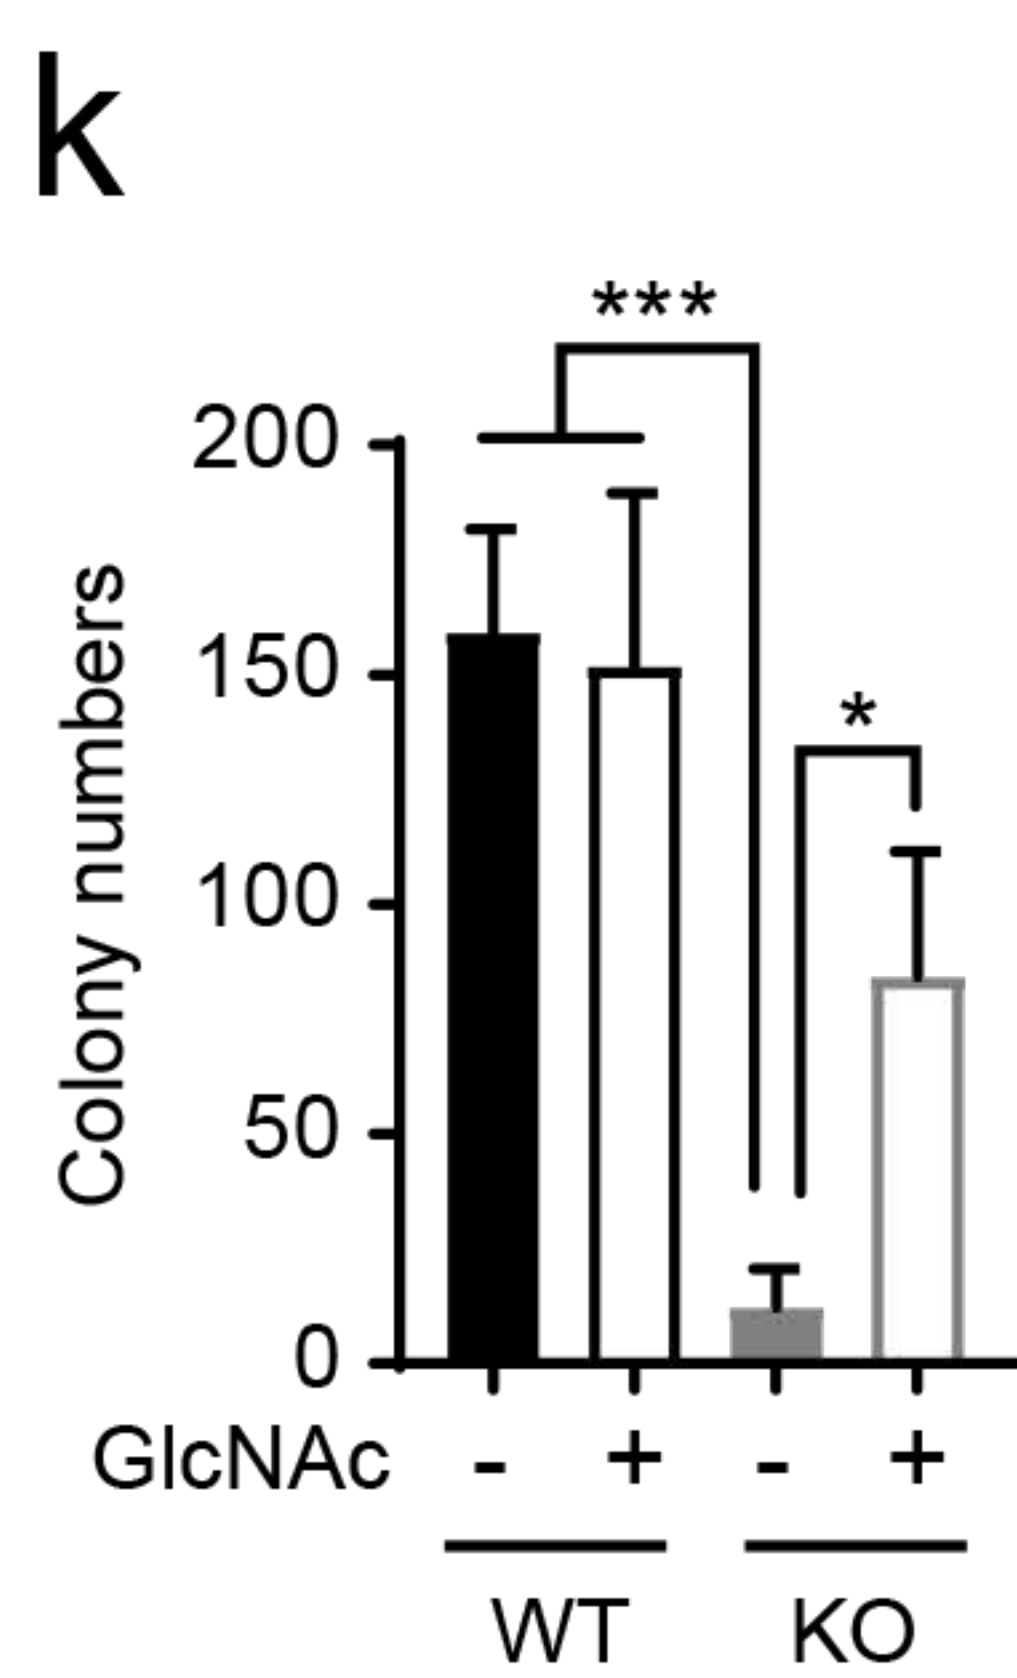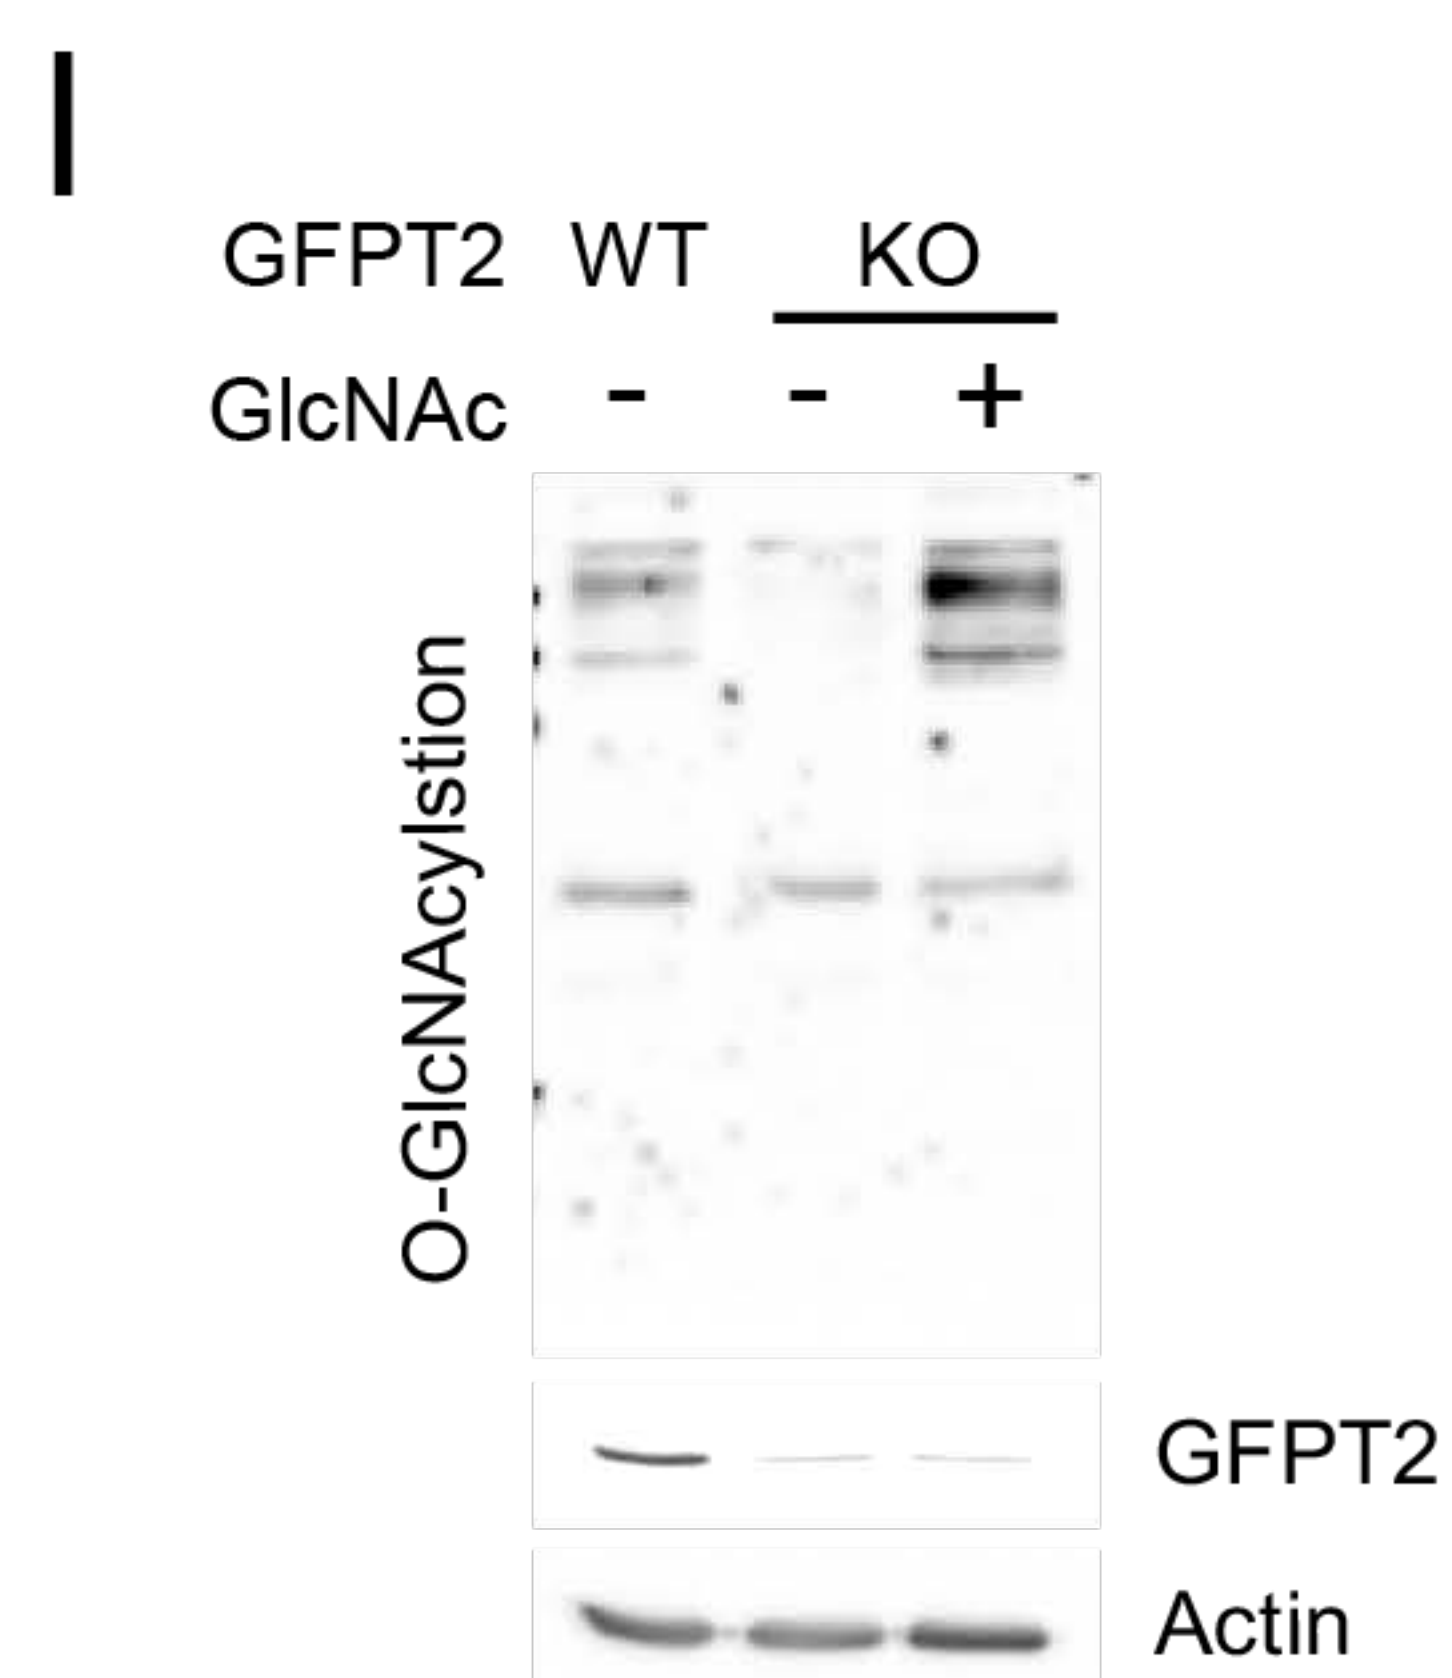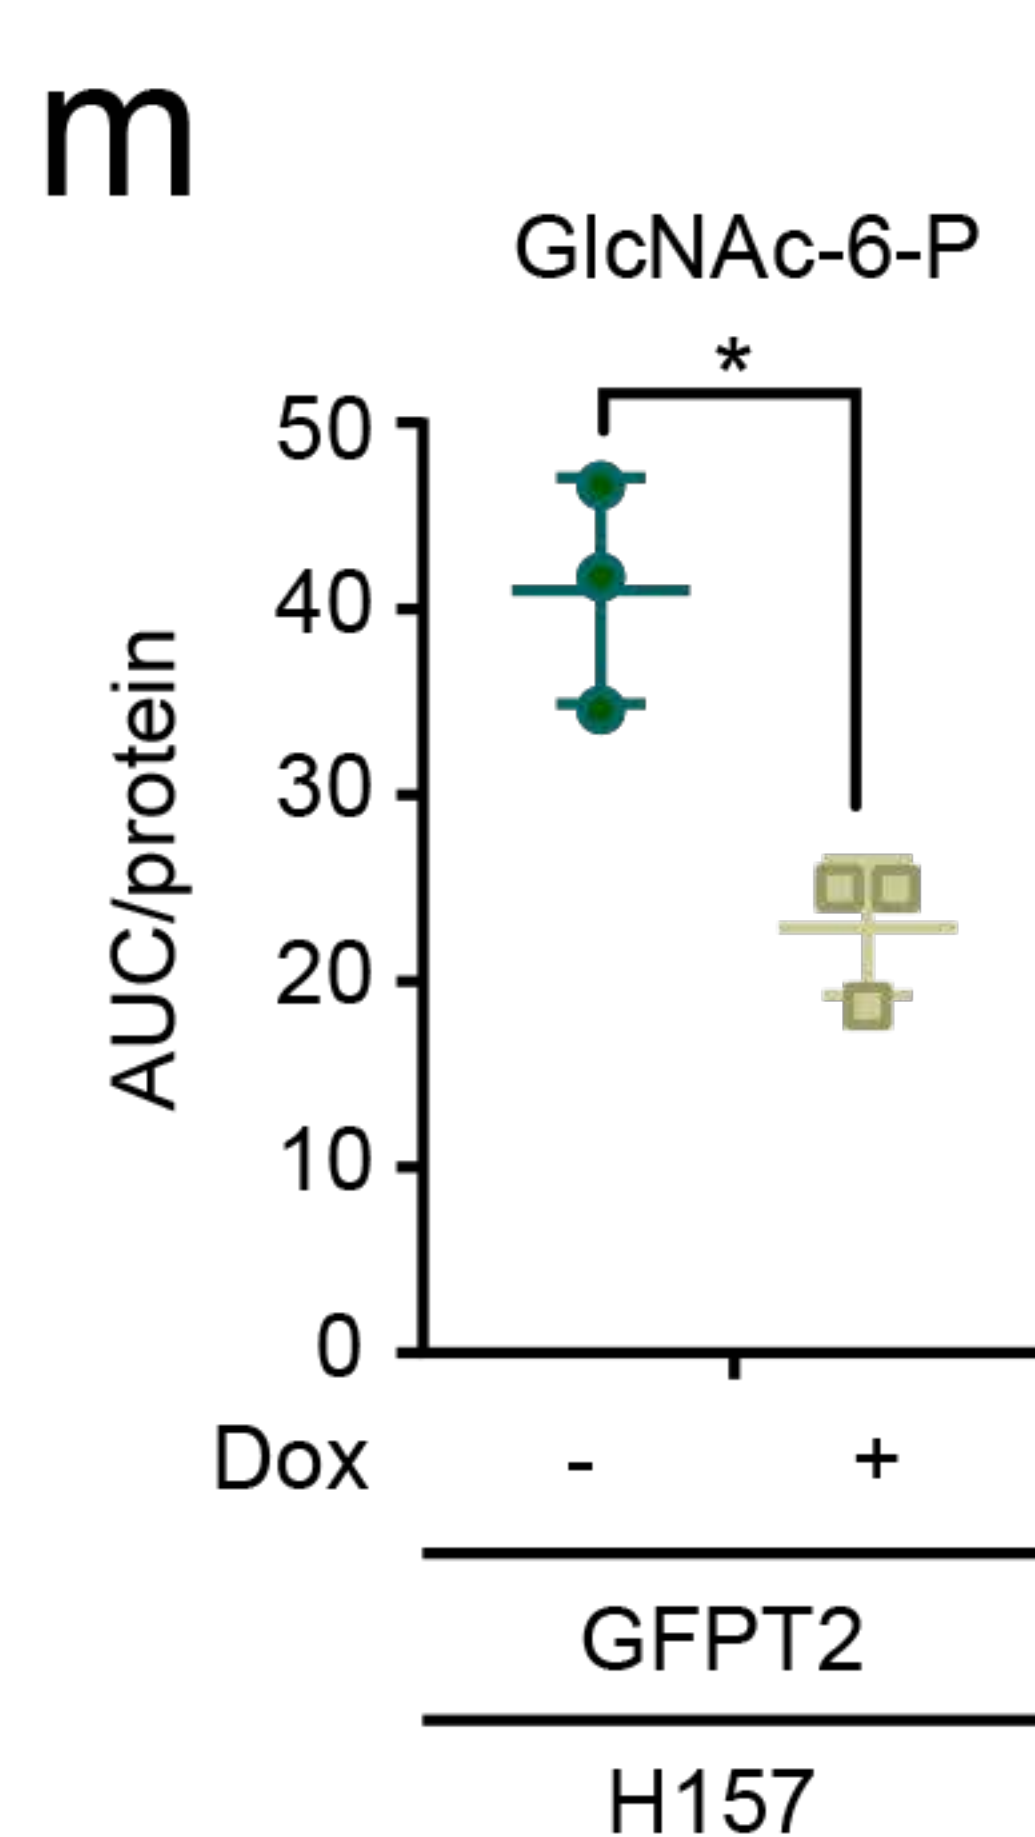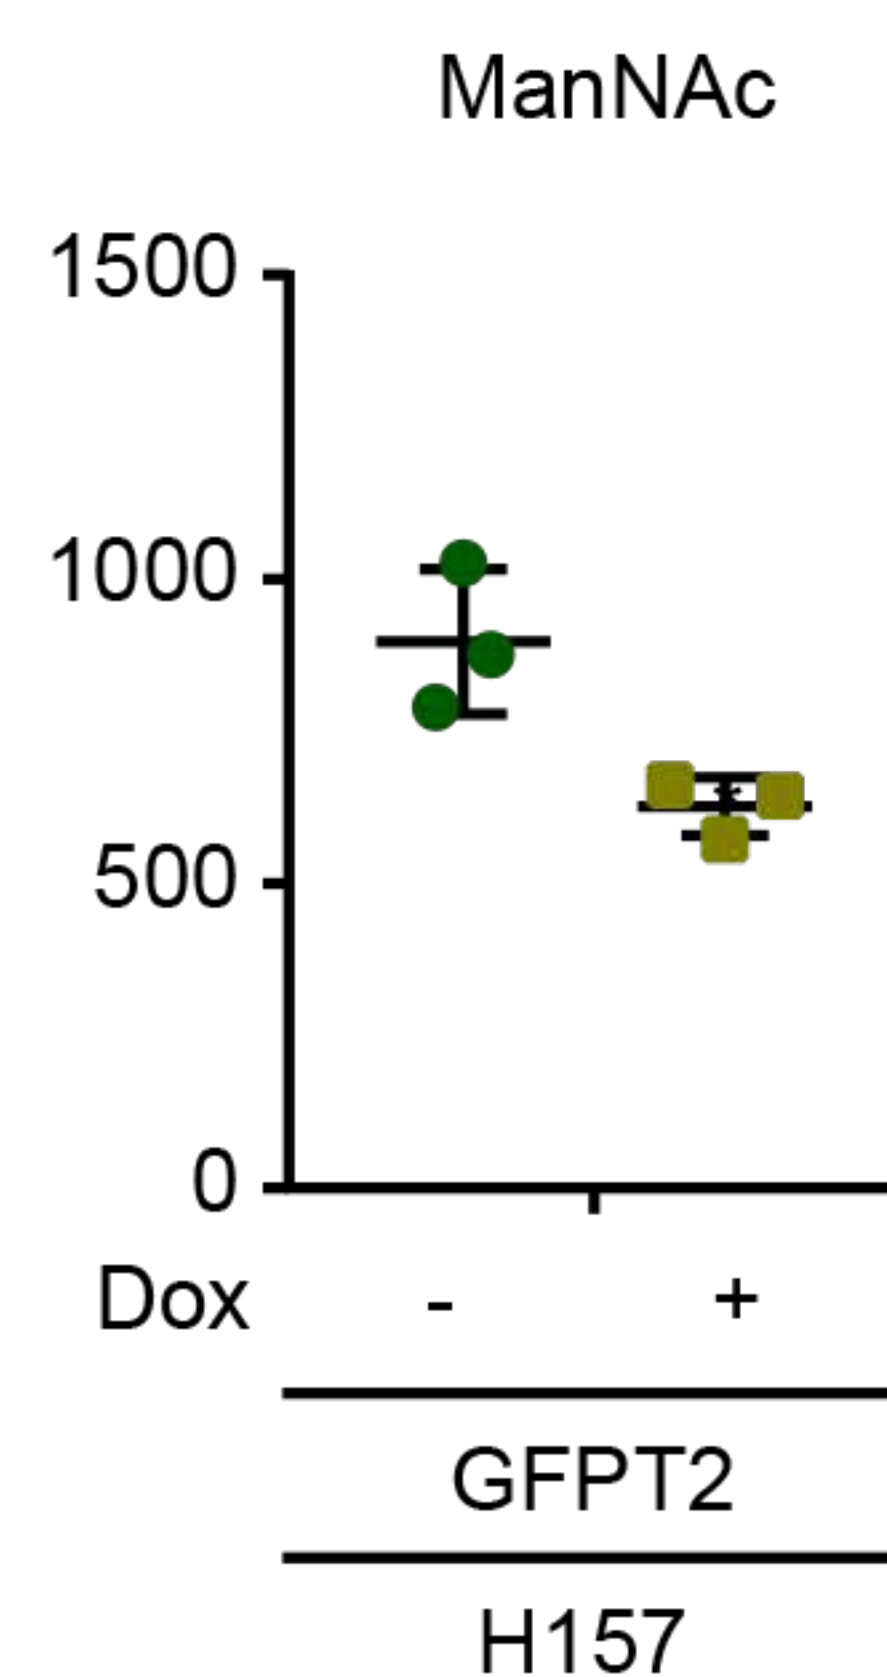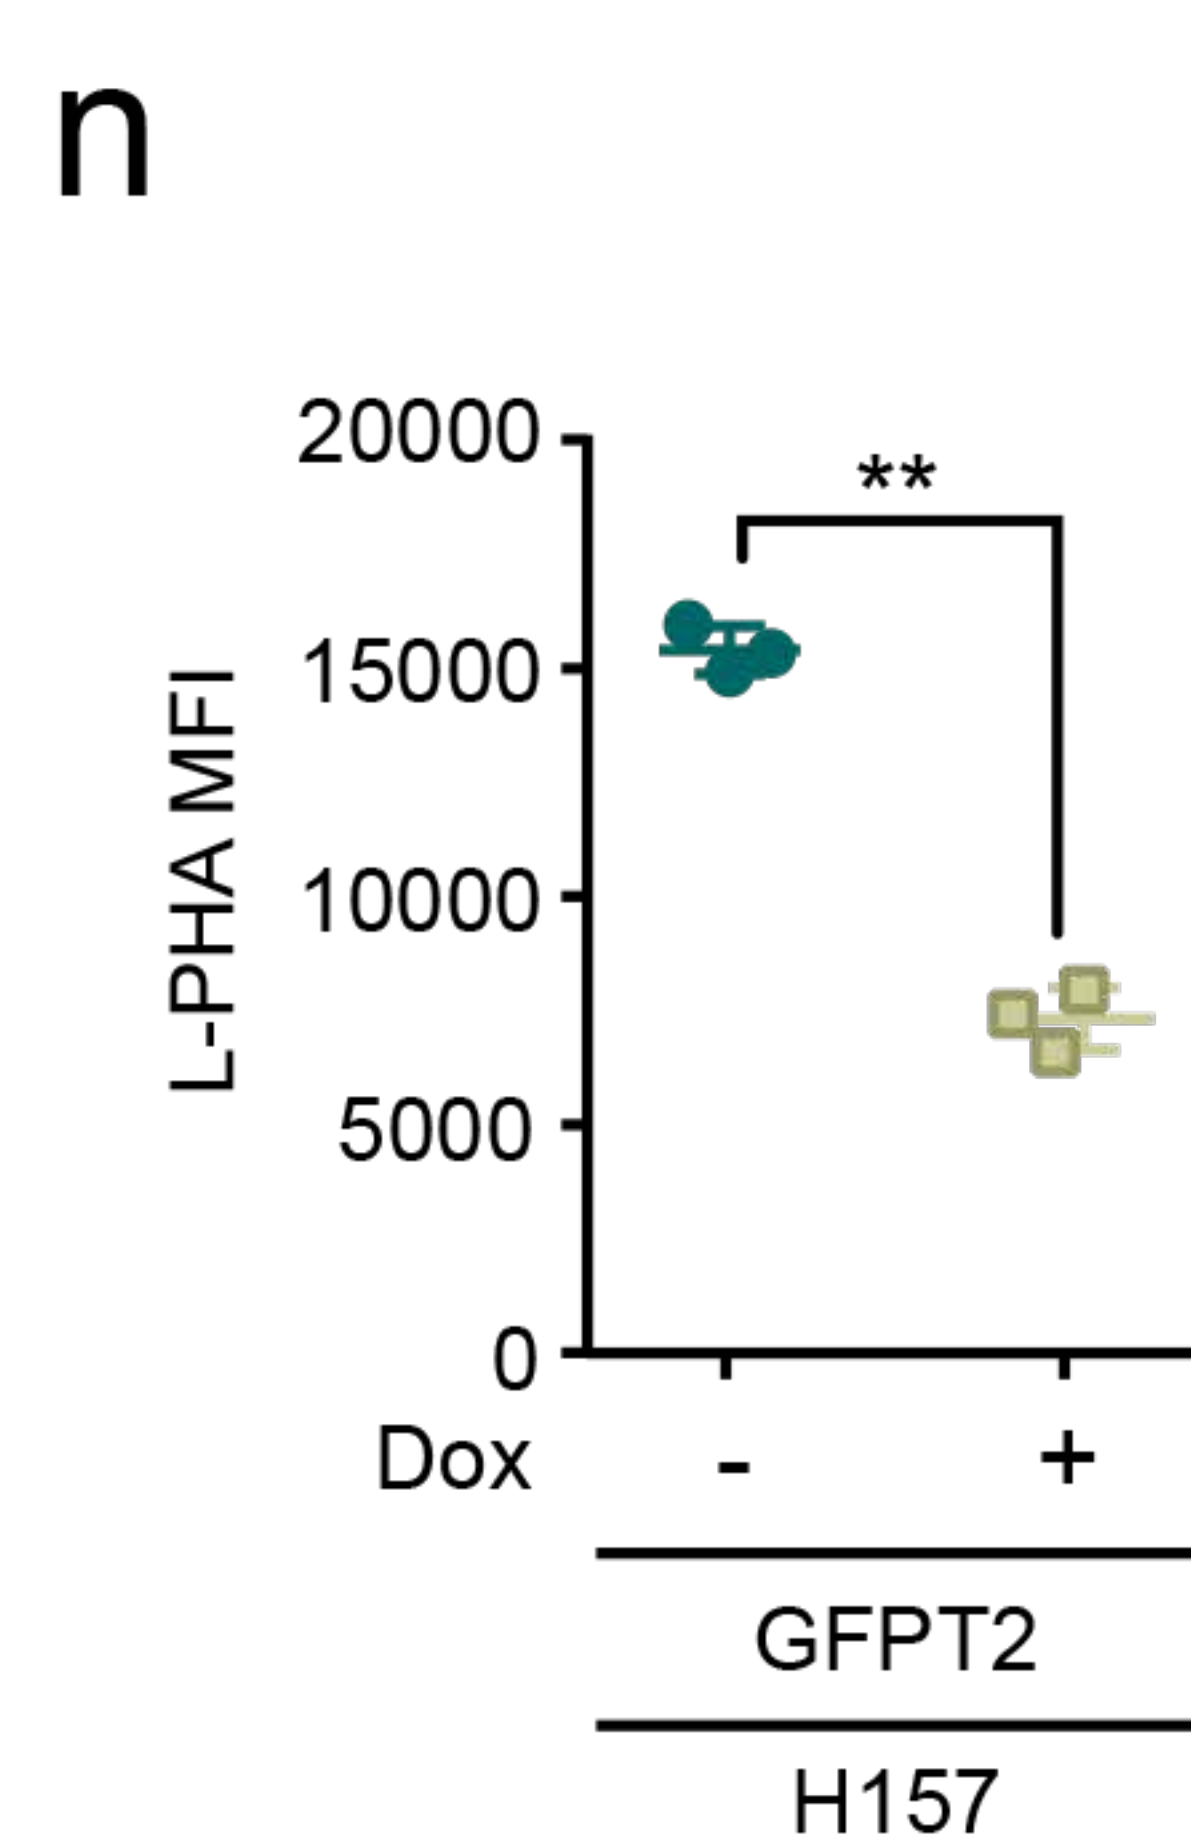



# Supplementary Figure 8

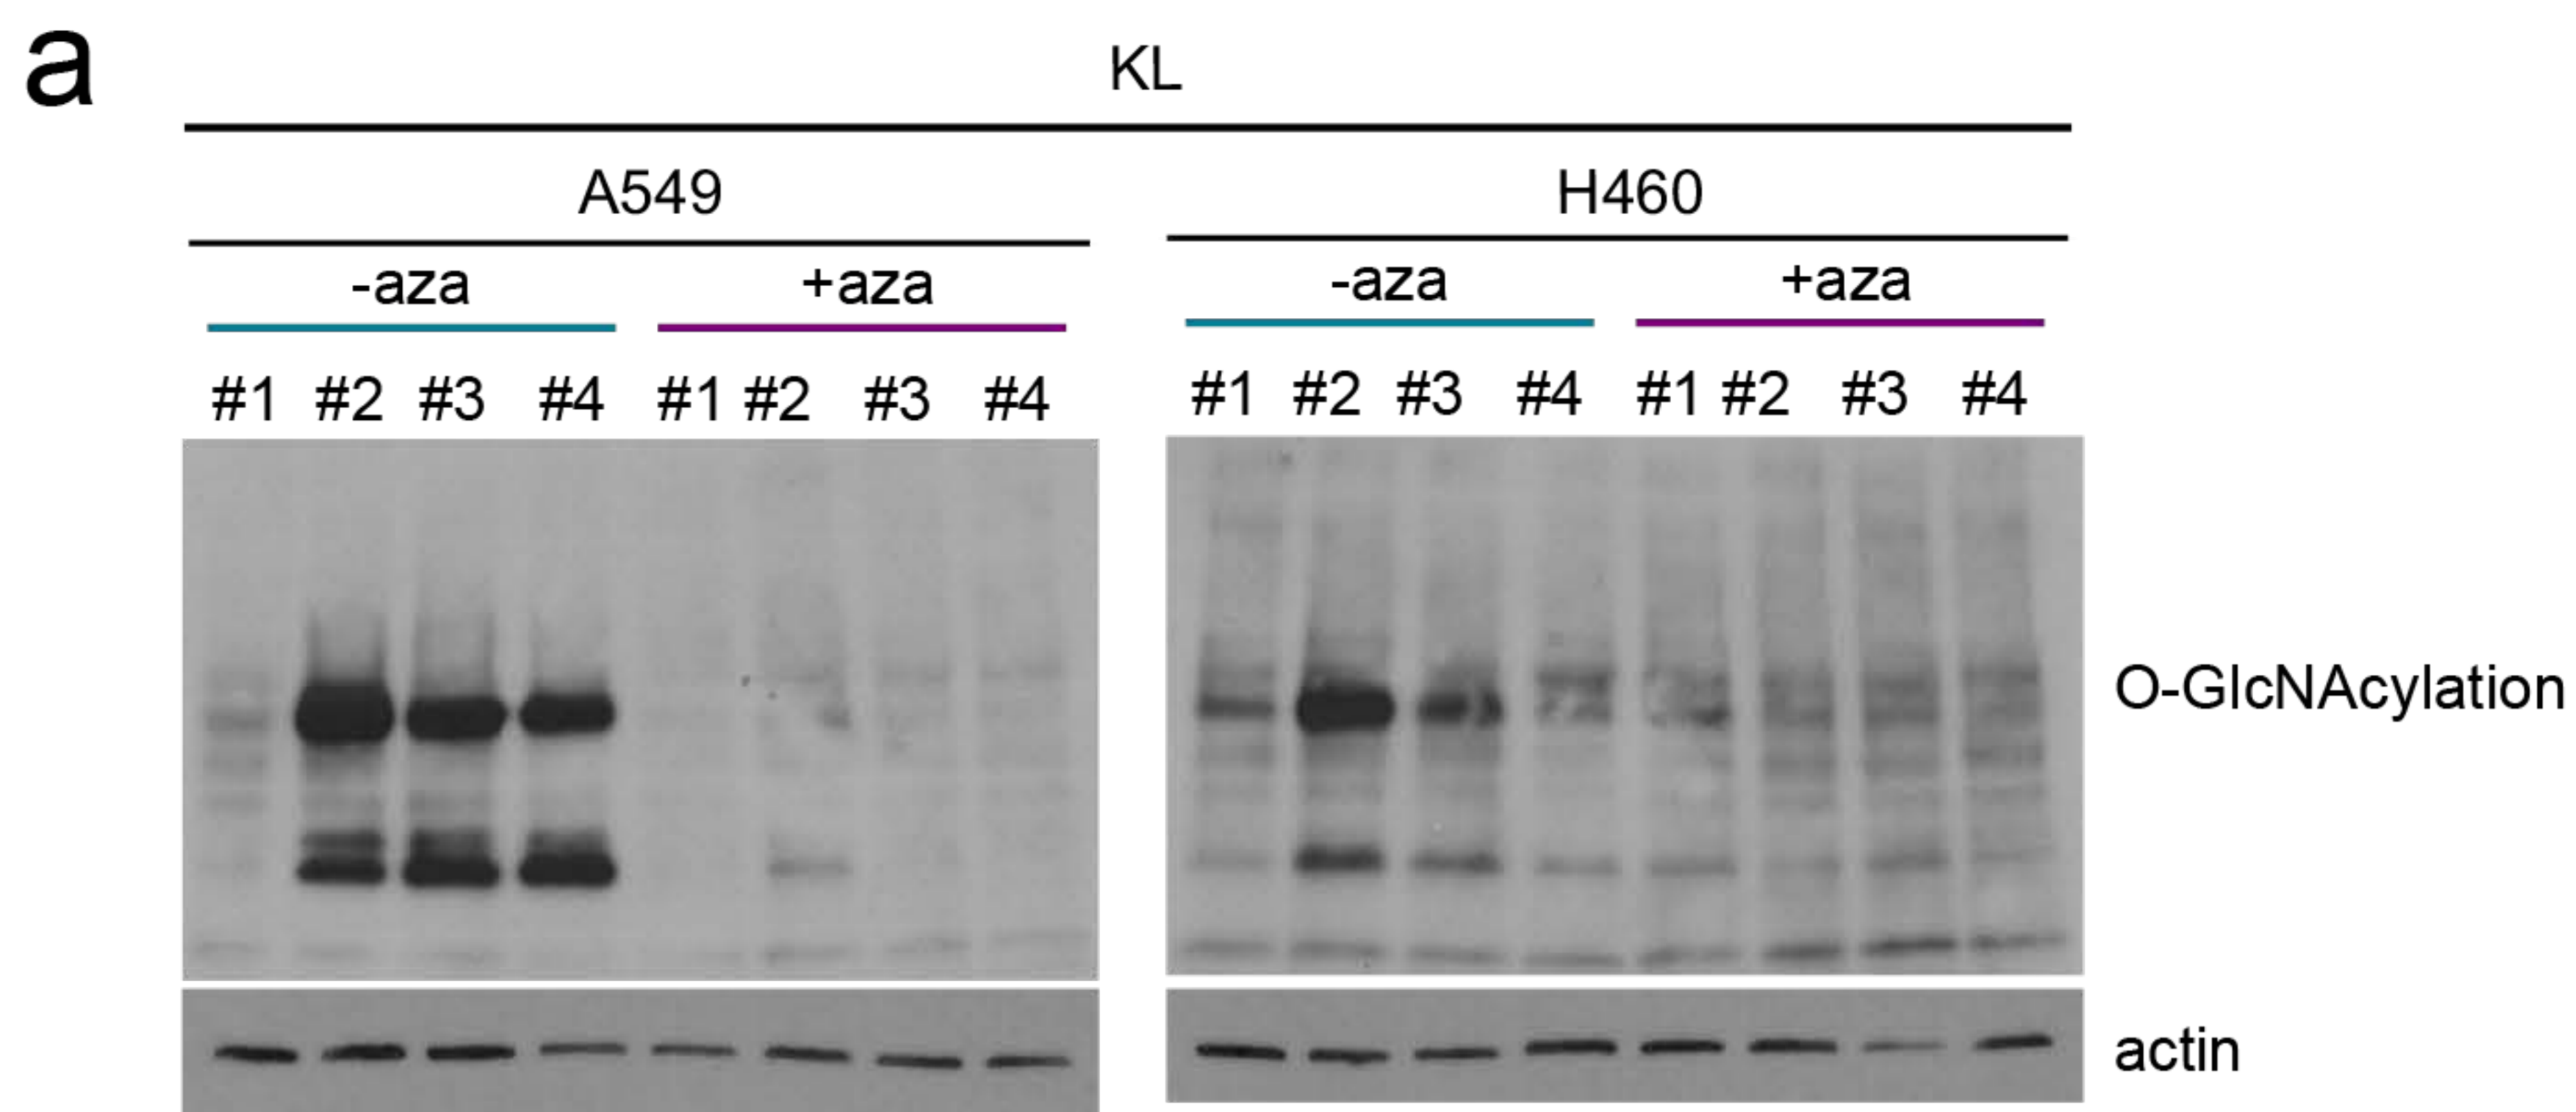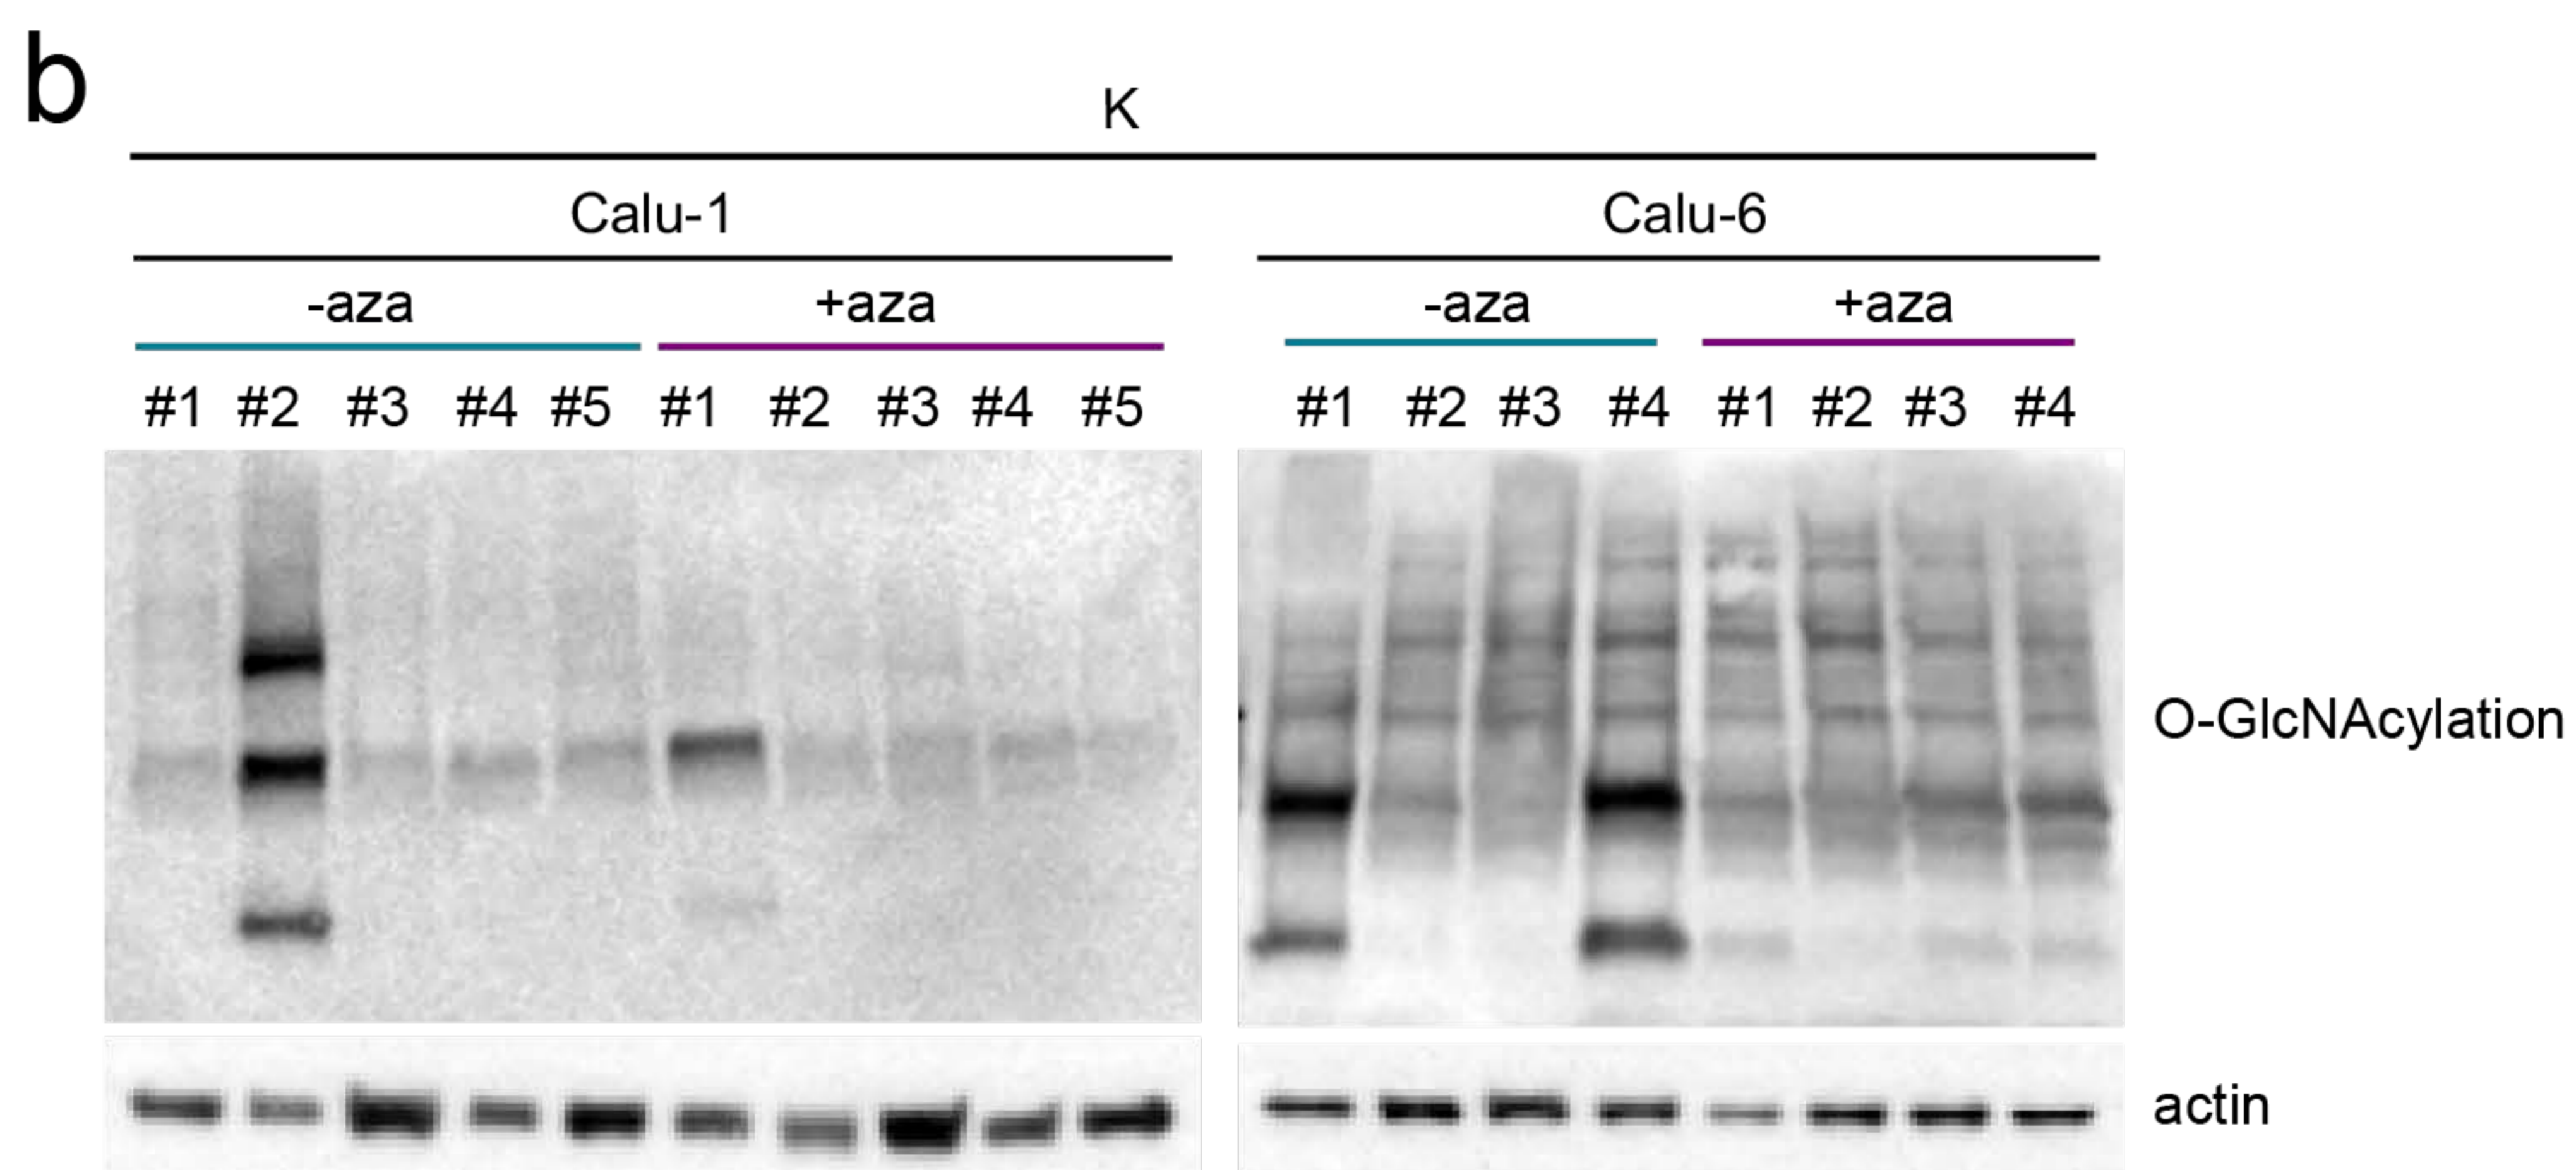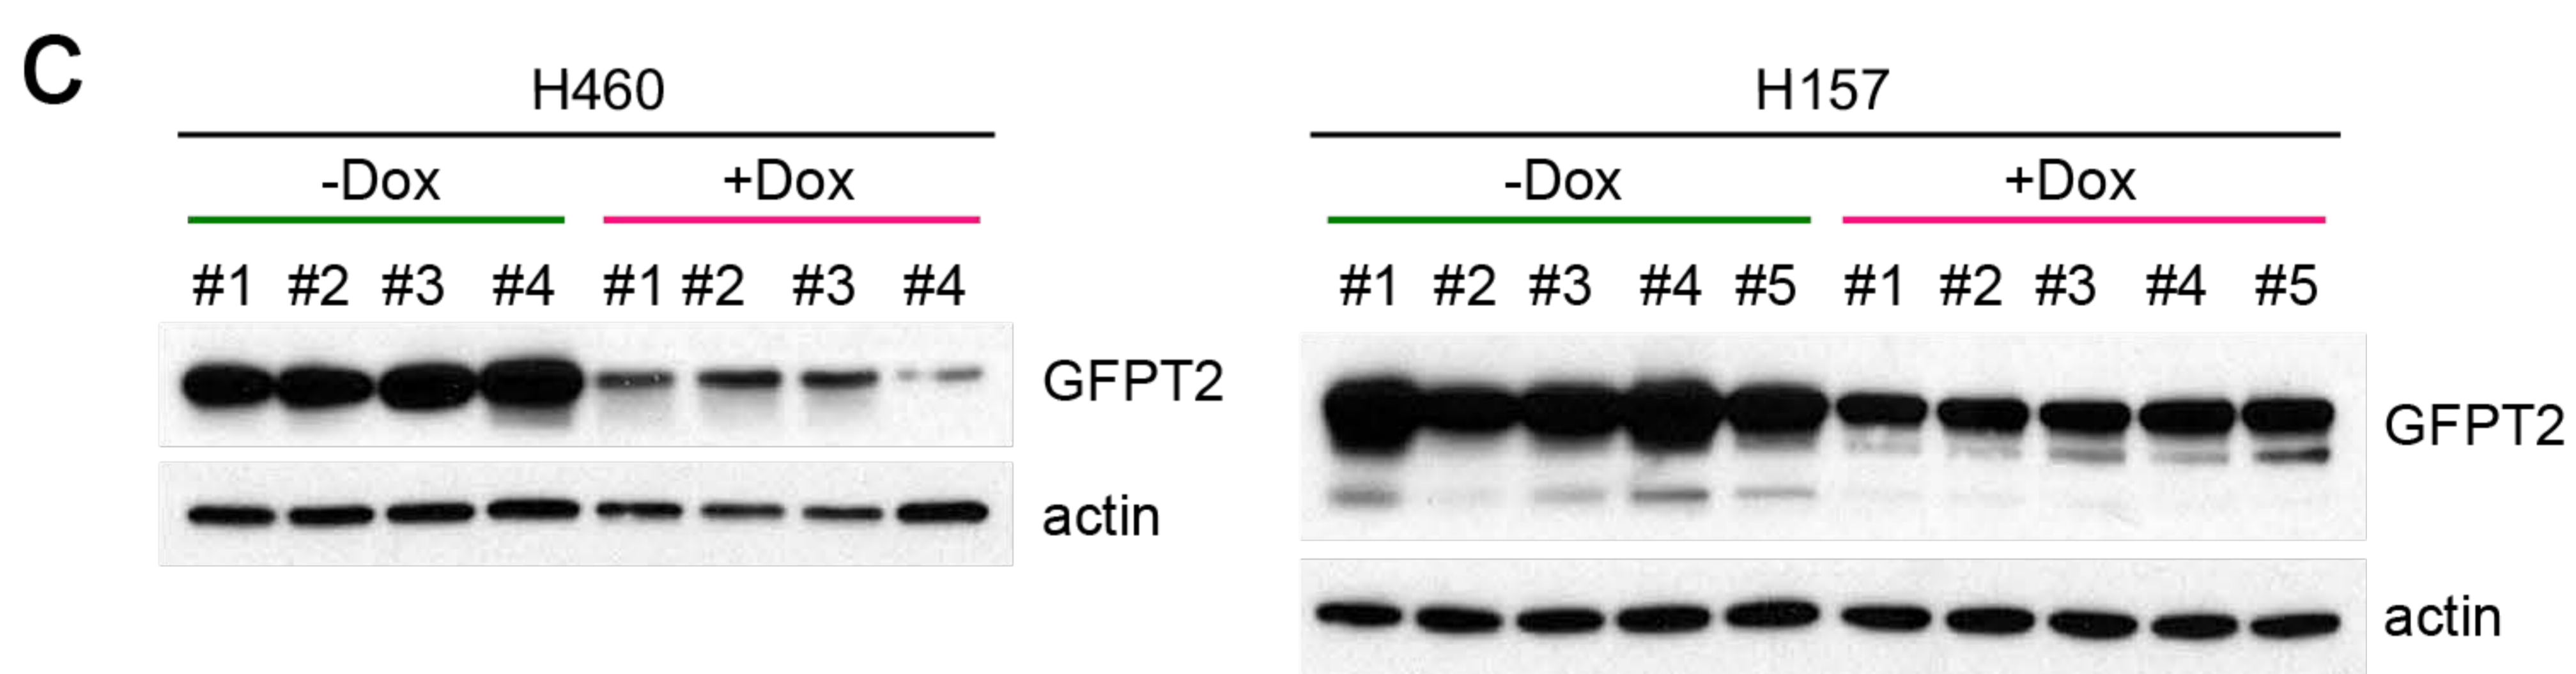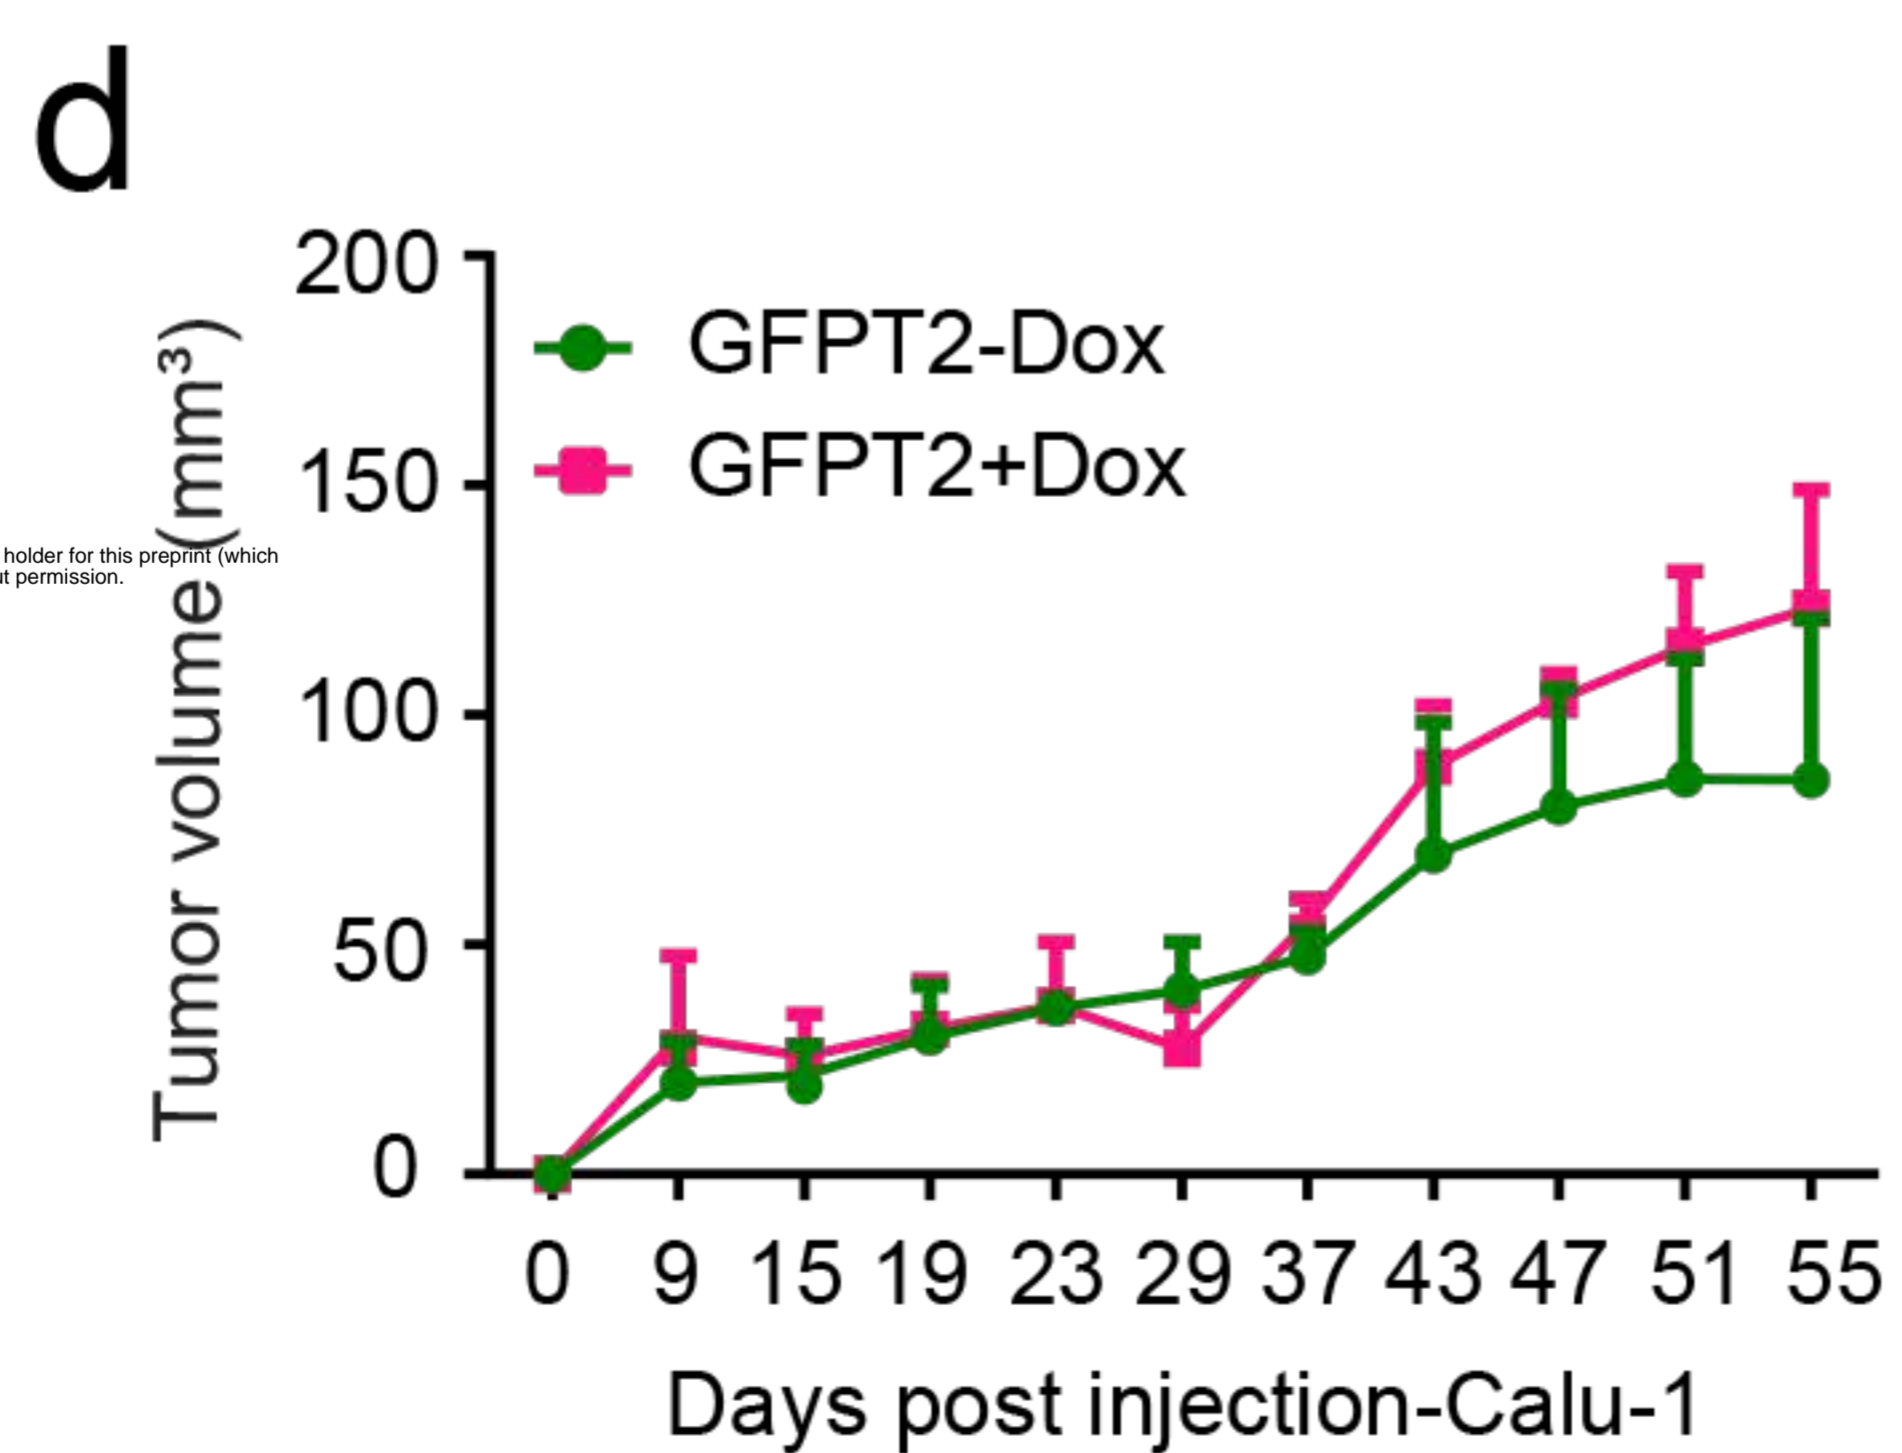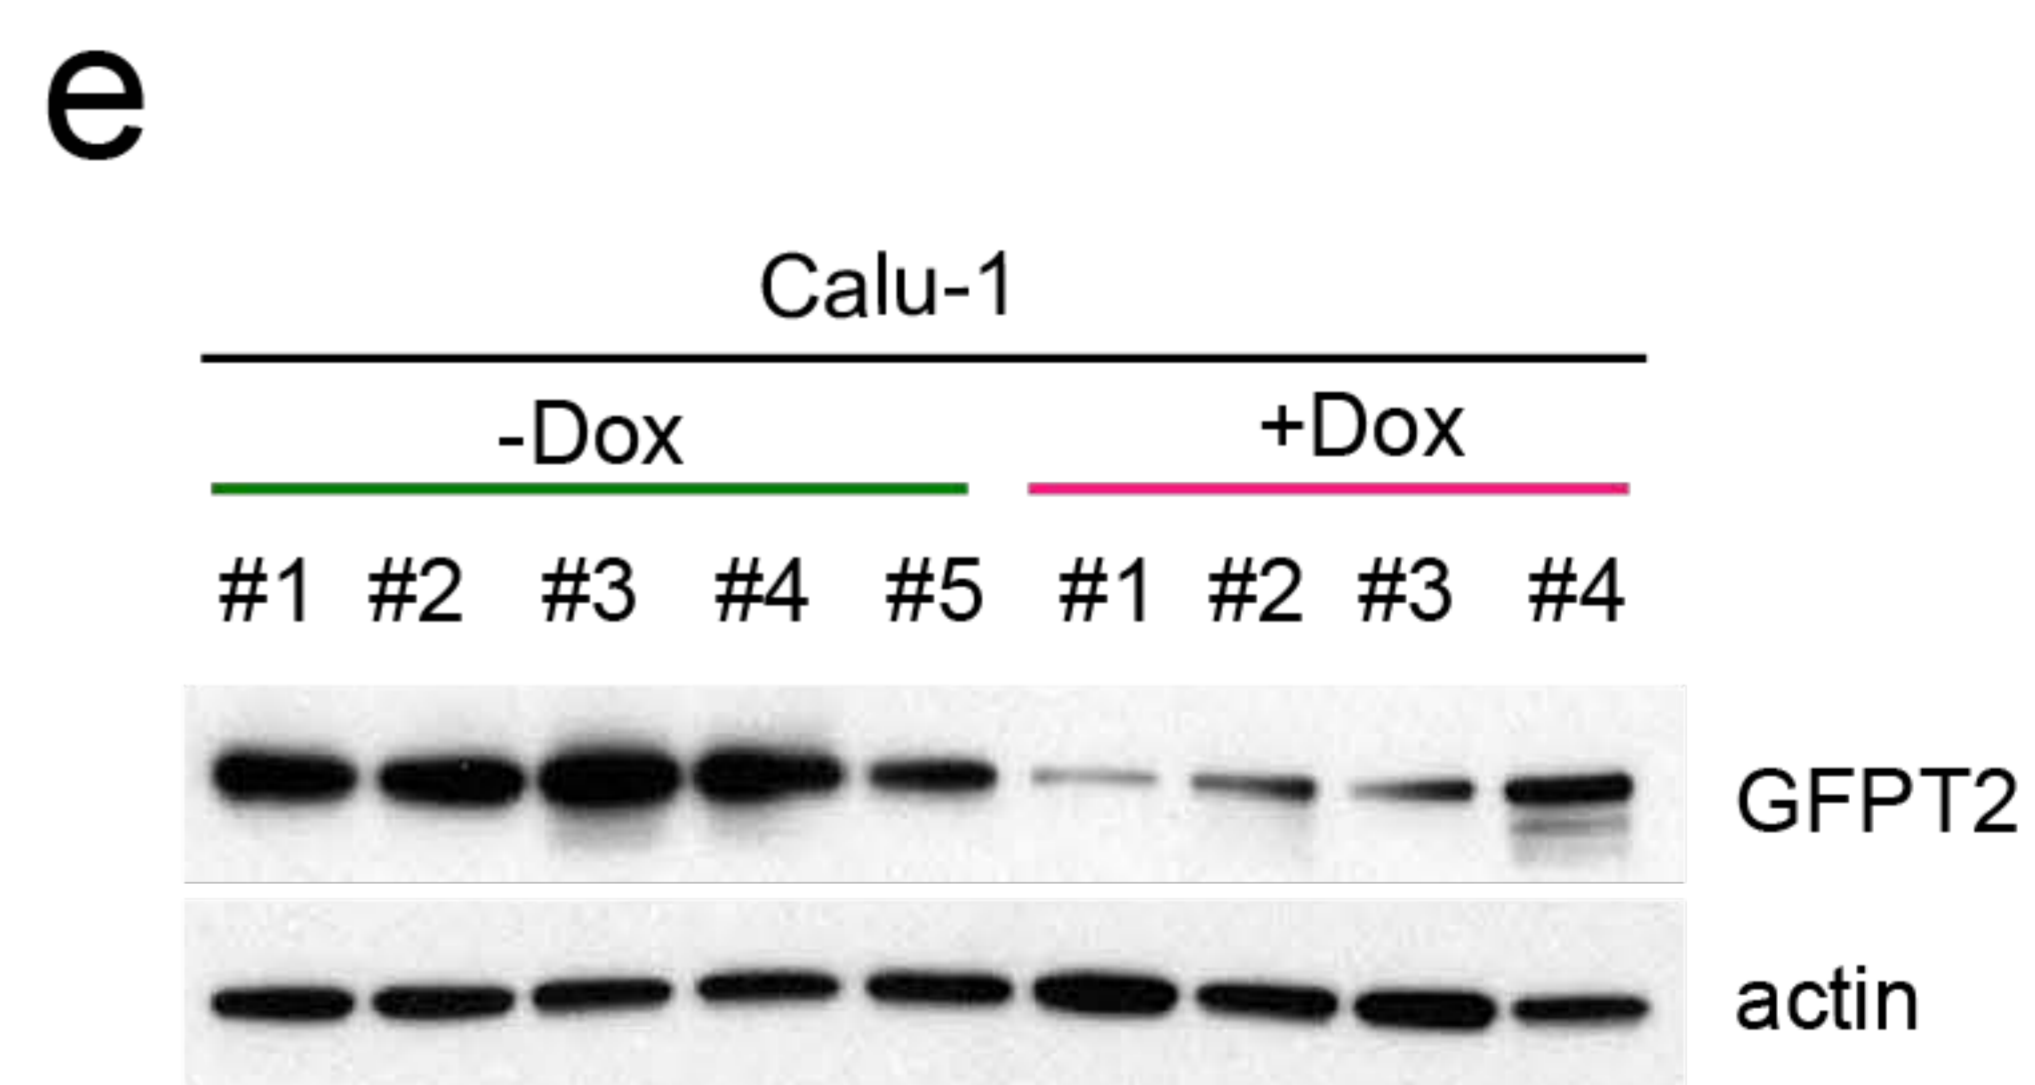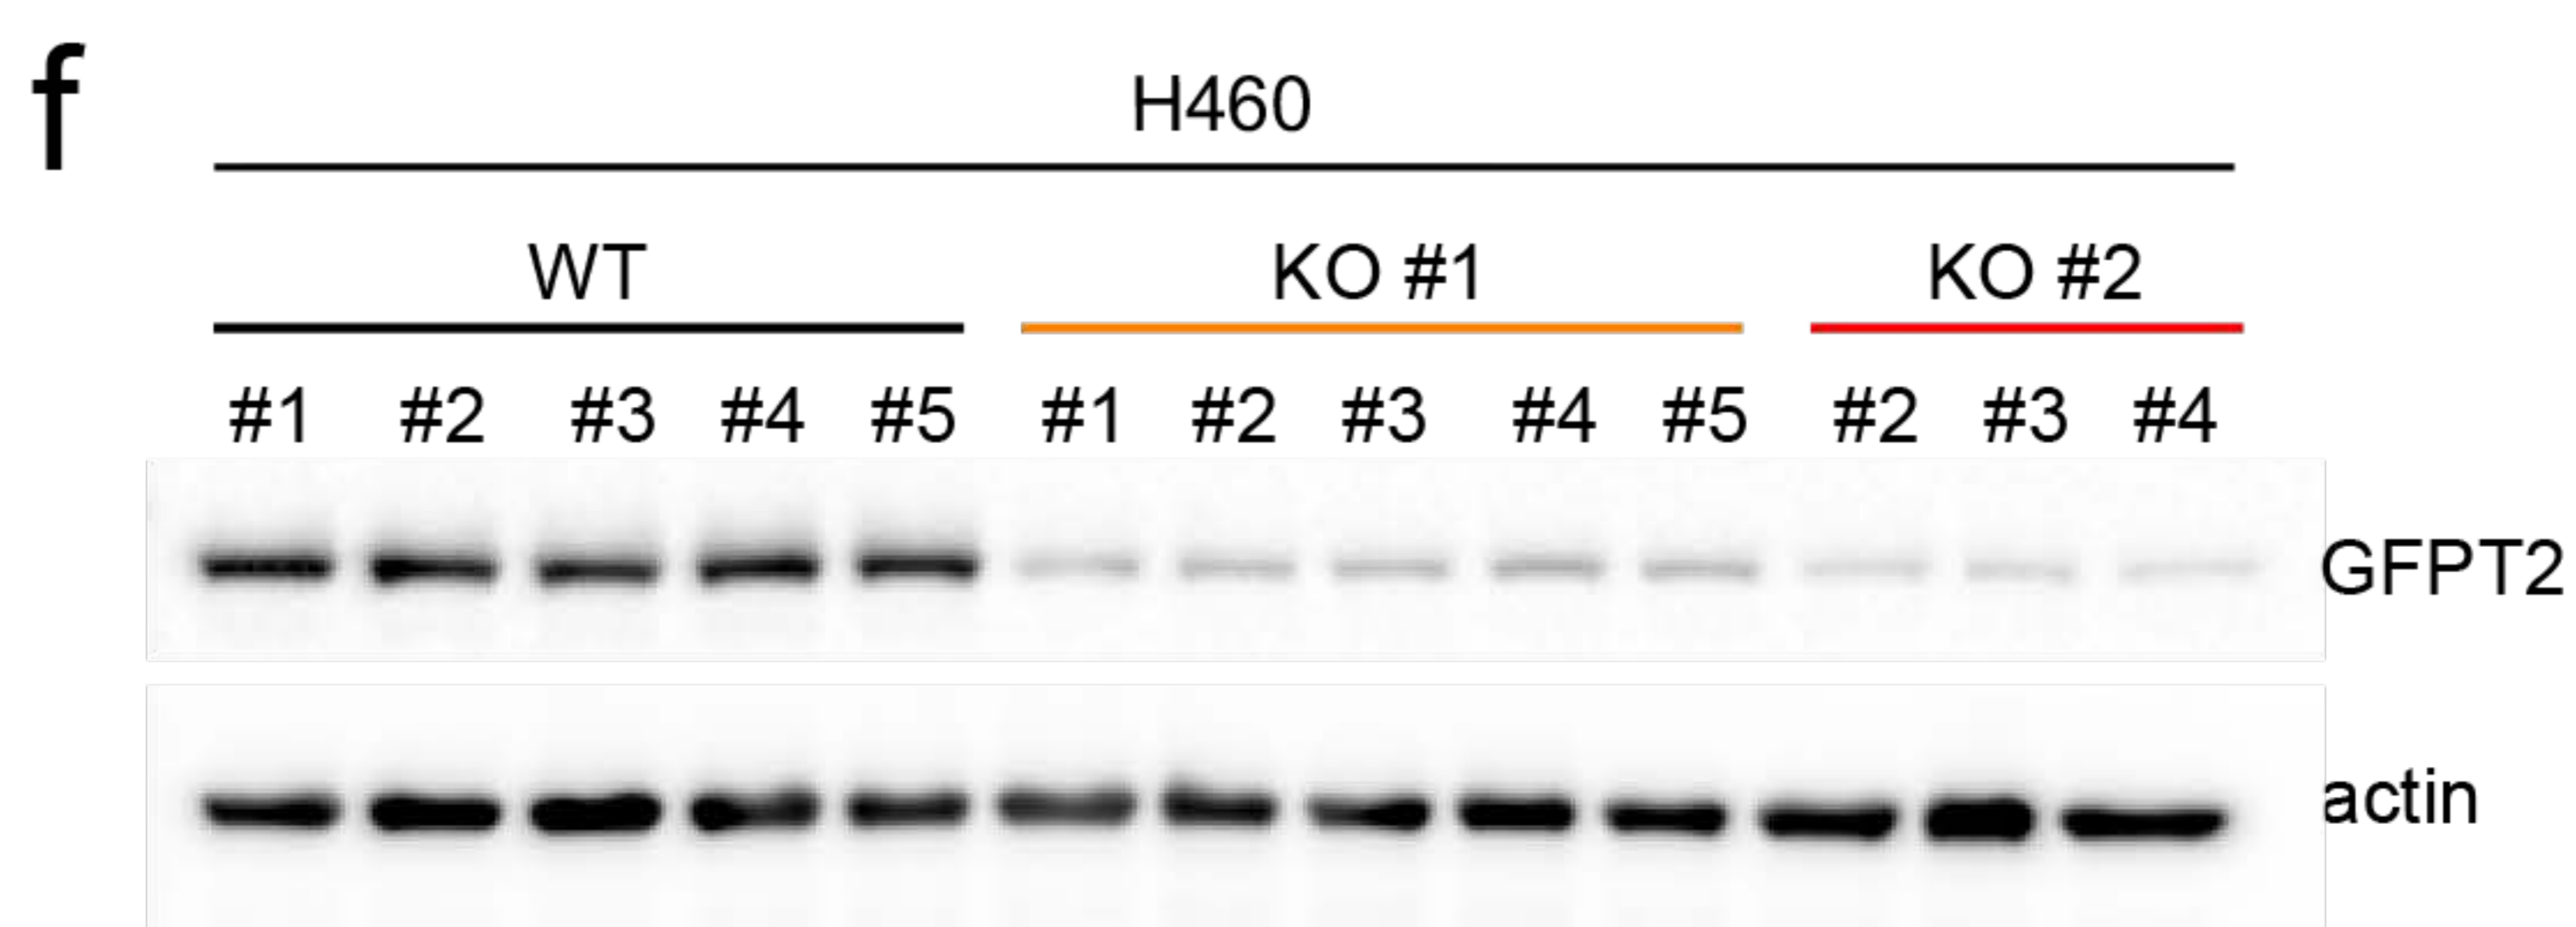



# Supplementary Figure 9

bioRxiv preprint doi: <https://doi.org/10.1101/2020.04.13.039669>; this version posted April 14, 2020. The copyright holder for this preprint (which was not certified by peer review) is the author/funder. All rights reserved. No reuse allowed without permission.

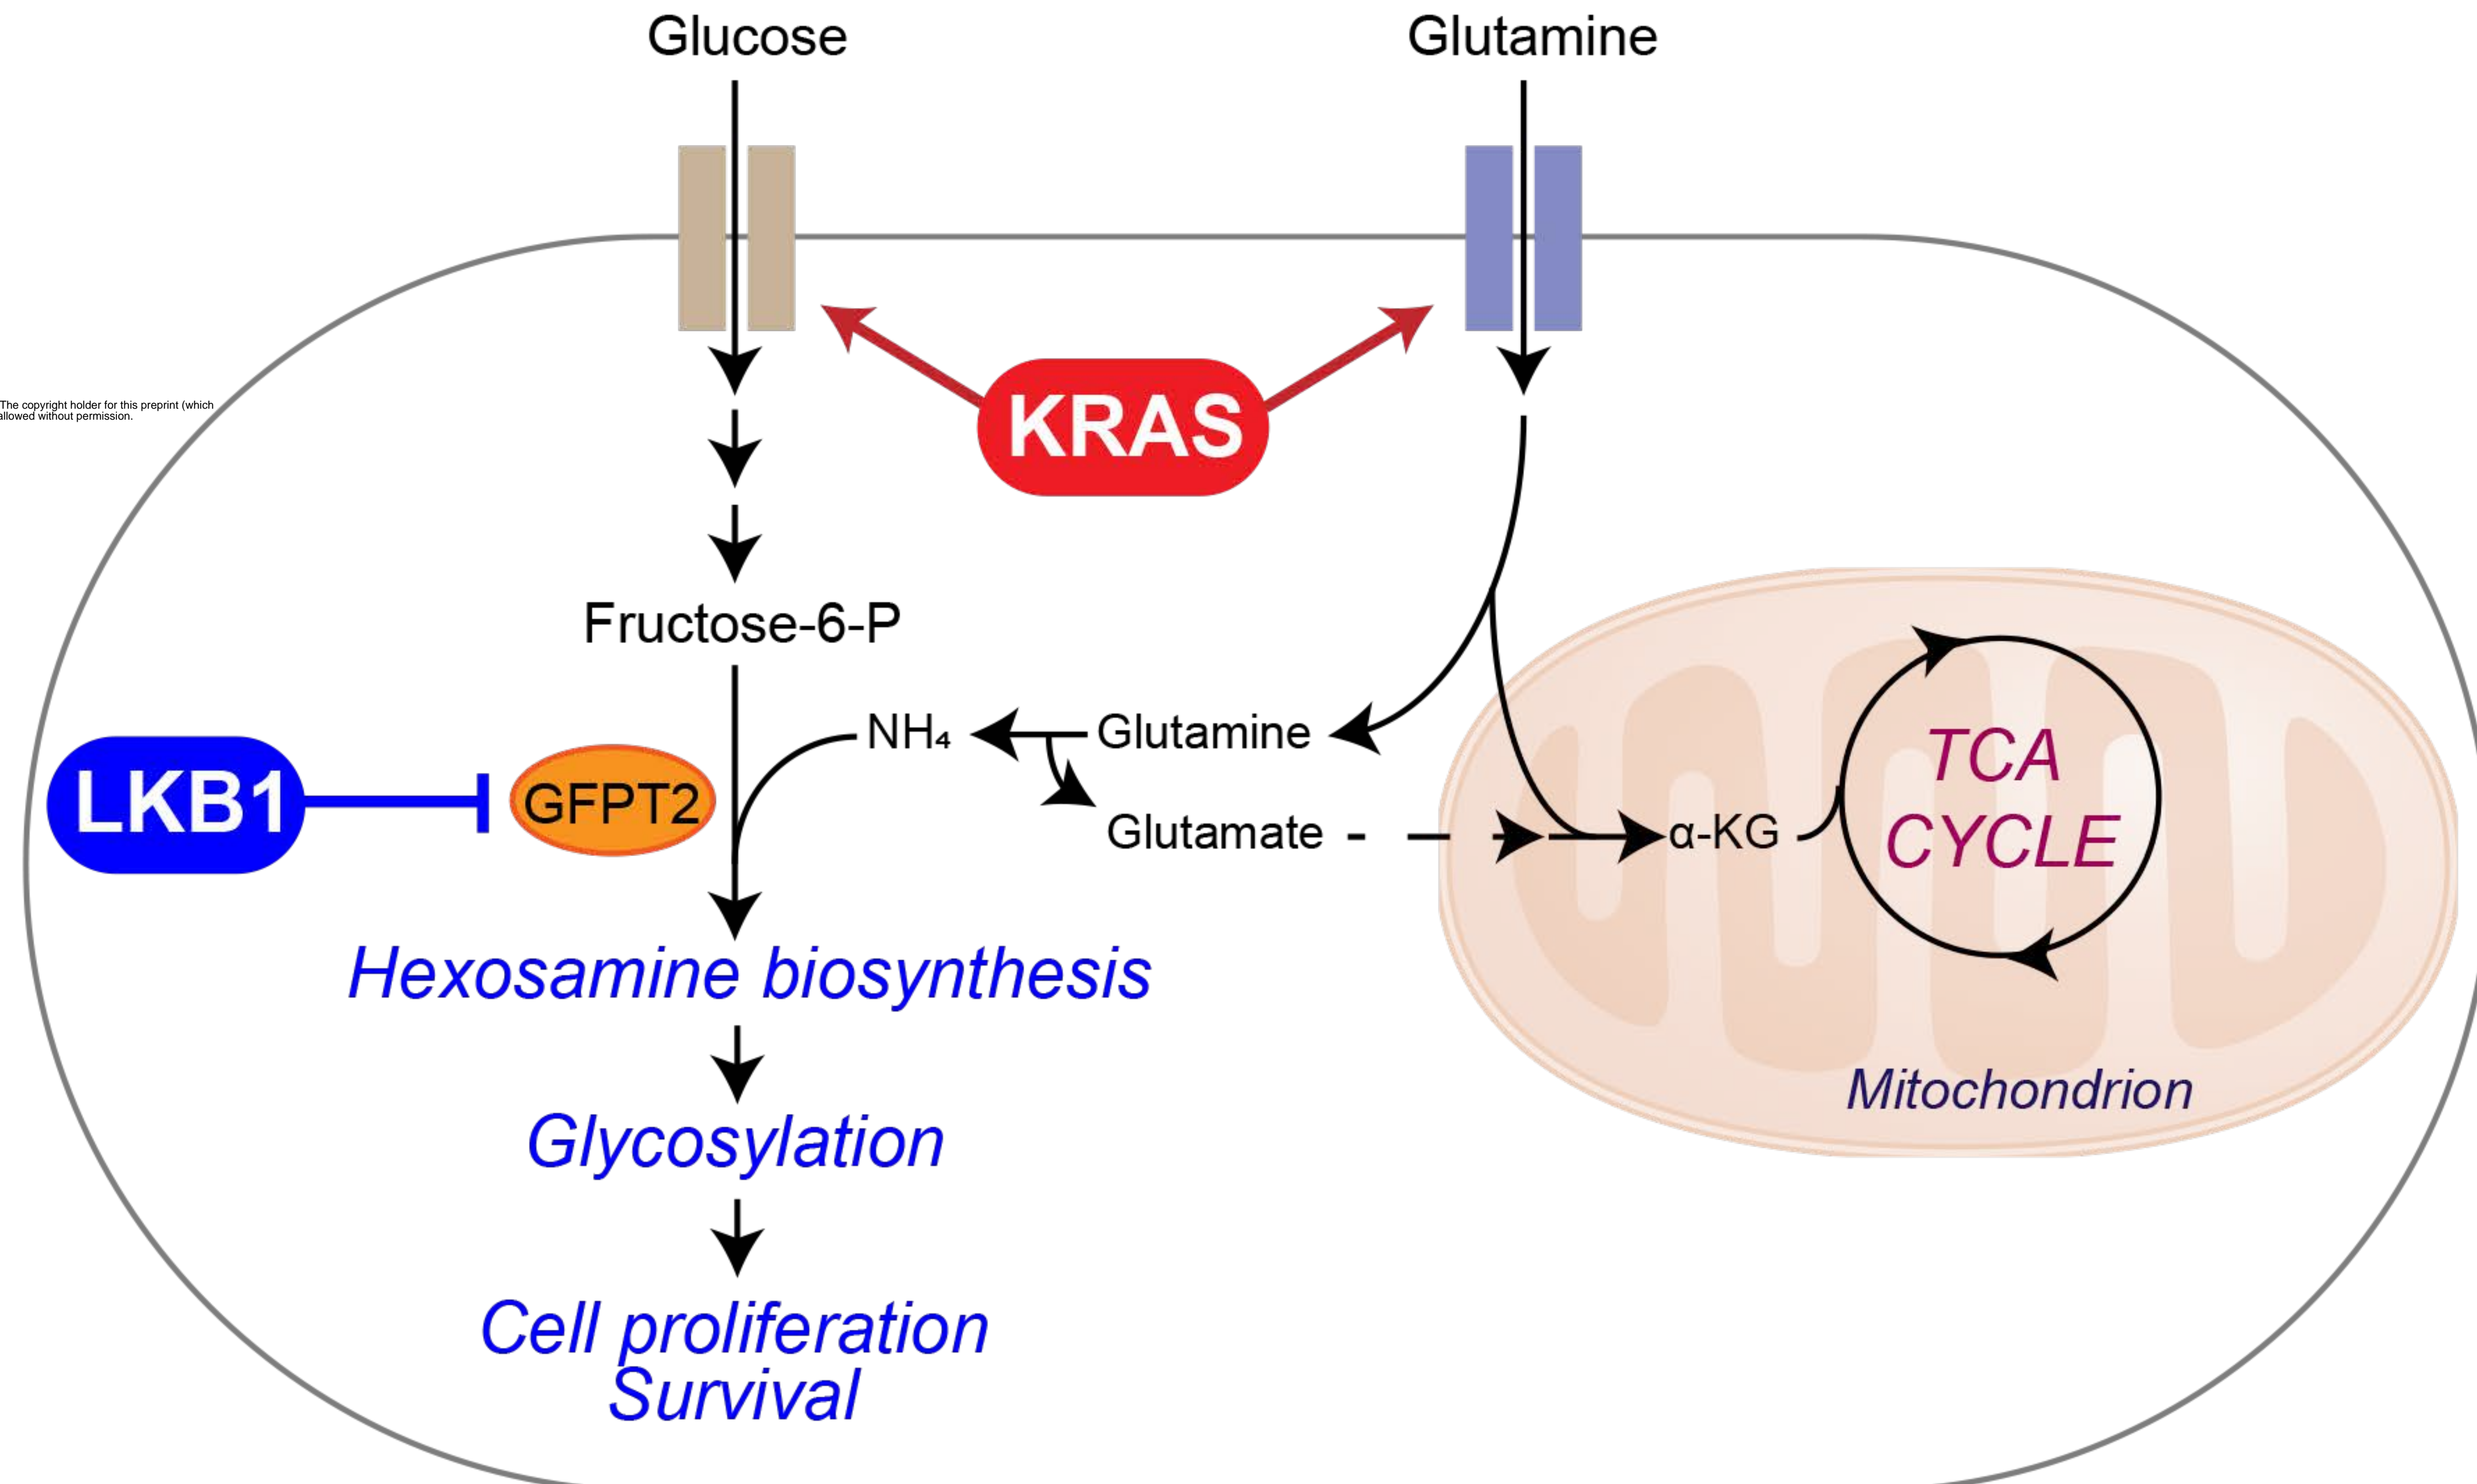

Source: https://www.biorxiv.org/content/biorxiv/early/2020/04/14/2020.04.13.039669.full.pdf
